# Supplementary material for: Palladium-catalysed cyclisation of vinylethylene carbonates and anhydrides: a new approach to diverse medium-sized bislactones
Source: Royal Society of Chemistry journal article supplement (doi:10.1039/d0cc05341d), 2020-01-01
Supplement: d0cc05341d1.pdf [file d0cc05341d1.pdf]

# **Palladium-catalysed Cyclisation of Vinylethylene Carbonates and Anhydrides: A New Approach to Diverse Medium-sized Bislactones**

Qing-Song Dai,<sup>a,b</sup> Ying-Mao Tao,<sup>a</sup> Xiang Zhang,<sup>a</sup> Hai-Jun Leng,<sup>a</sup> Hua Huang,<sup>a</sup> Peng-Xiang,<sup>a</sup>  
Qing-Zhu Li,<sup>a</sup> Qi-Wei Wang,<sup>a</sup> and Jun-Long Li<sup>\*,a</sup>

<sup>a</sup> *Antibiotics Research and Re-evaluation Key Laboratory of Sichuan Province, Sichuan Industrial Institute of Antibiotics, Chengdu University, Chengdu 610052, China. E-mail: lijunlong709@hotmail.com*

<sup>b</sup> *Chengdu Institute of Organic Chemistry, Chinese Academy of Sciences, Chengdu 610041, China.*

## **Supporting Information**

### **Table of Contents**

|                                                                                                  |            |
|--------------------------------------------------------------------------------------------------|------------|
| <b>1. General Information.....</b>                                                               | <b>S2</b>  |
| <b>2. Bioactive Molecules Bearing a (Bis-)Lactone Skeleton and its Synthetic Motivation.....</b> | <b>S3</b>  |
| <b>3. Optimisation Studies.....</b>                                                              | <b>S4</b>  |
| <b>4. General Procedure for the Cyclisation of Isatoic Anhydrides and VECs.....</b>              | <b>S7</b>  |
| <b>5. General Procedure for the Cyclisation of Cyclic Anhydride and VECs.....</b>                | <b>S28</b> |
| <b>6. General Procedure for the Reactions of Linear Anhydrides and VECs.....</b>                 | <b>S45</b> |
| <b>7. Synthetic Transformation of 5a and 10b.....</b>                                            | <b>S47</b> |
| <b>8. Experiments for Mechanism Studies.....</b>                                                 | <b>S49</b> |
| <b>9. Crystal Data and Structure Refinement.....</b>                                             | <b>S51</b> |
| <b>10. References and Notes.....</b>                                                             | <b>S55</b> |
| <b>11. NMR Spectra.....</b>                                                                      | <b>S56</b> |

## 1. General Information

### General Procedures

- All reactions were performed in oven-dried or flame-dried reaction vessels, modified Schlenk flasks, or round-bottom flasks. The flasks were fitted with Teflon screw caps and reactions were conducted under an atmosphere of argon if needed. Gas-tight syringes with stainless steel needles were used to transfer air- and moisture-sensitive liquids. All moisture and/or air sensitive solid compounds were manipulated inside normal desiccators. Flash column chromatography was performed using silica gel (40–63  $\mu\text{m}$ , 230–400 mesh).
- Analytical thin layer chromatography (TLC) was performed on silica gel 60 F<sub>254</sub> aluminum plates (Merck) containing a 254 nm fluorescent indicator. TLC plates were visualized by exposure to short wave ultraviolet light (254 nm) and I<sub>2</sub>.
- Organic solutions were concentrated at 30–50 °C on rotary evaporators at ~10 torr followed by drying on vacuum pump at ~1 torr. Reaction temperatures are reported as the temperature of the bath surrounding the vessel unless otherwise stated.

### Materials

- Commercial reagents and solvents were purchased from Adamas-beta, Aldrich Chemical Co., Alfa Aesar, Macklin and Energy Chemical and used as received with the following exceptions: THF, Et<sub>2</sub>O and toluene were purified by refluxing over Na-benzophenone under positive argon pressure followed by distillation.<sup>1</sup> The isatoic anhydrides **1**<sup>2</sup> and vinylethylene carbonates **2**<sup>3</sup> were prepared according to literature procedure.

### Instrumentation

- Proton nuclear magnetic resonance (<sup>1</sup>H NMR) spectra were recorded with JEOL-600M. Proton chemical shifts are reported in parts per million ( $\delta$  scale), and are referenced using residual protium in the NMR solvent (CDCl<sub>3</sub>:  $\delta$  7.26 (CHCl<sub>3</sub>)). Data are reported as follows: chemical shift [multiplicity (s = singlet, d = doublet, t = triplet, q = quartet, m = multiplet, br s = broad singlet), coupling constant(s) (Hz), integration].
- Carbon-13 nuclear magnetic resonance (<sup>13</sup>C NMR) spectra were recorded with JEOL 150 MHz spectrometers. Carbon chemical shifts are reported in parts per million ( $\delta$  scale), and are referenced using the carbon resonances of the solvent ( $\delta$  77.0 (CHCl<sub>3</sub>)). Data are reported as follows: chemical shift [multiplicity (if not singlet), assignment (C<sub>q</sub> = fully substituted carbon)].
- High resolution mass spectra (HRMS) were recorded on a Waters SYNAPT G2 using an electrospray (ESI) ionisation source.
- Melting points were recorded on WRX-X-4A melting point apparatus.

## 2. Bioactive Molecules Bearing a (Bis-)Lactone Skeleton and its Synthetic Motivation

The medium-sized lactones including bislactones are prevalent in several bioactive molecules (for detail, see Figure S1).<sup>4</sup> However, medium-sized skeletons are rarely found in the current approved drug list. A main reason is probably the difficulty in developing efficient catalytic system to establish diverse medium-sized compound(especially for lactones or bislactones) libraries for drug-leads screening. Therefore, a general protocol for the rapid and diversity-oriented synthesis of medium-sized bislactones in a single-step reaction is significant and highly desirable.

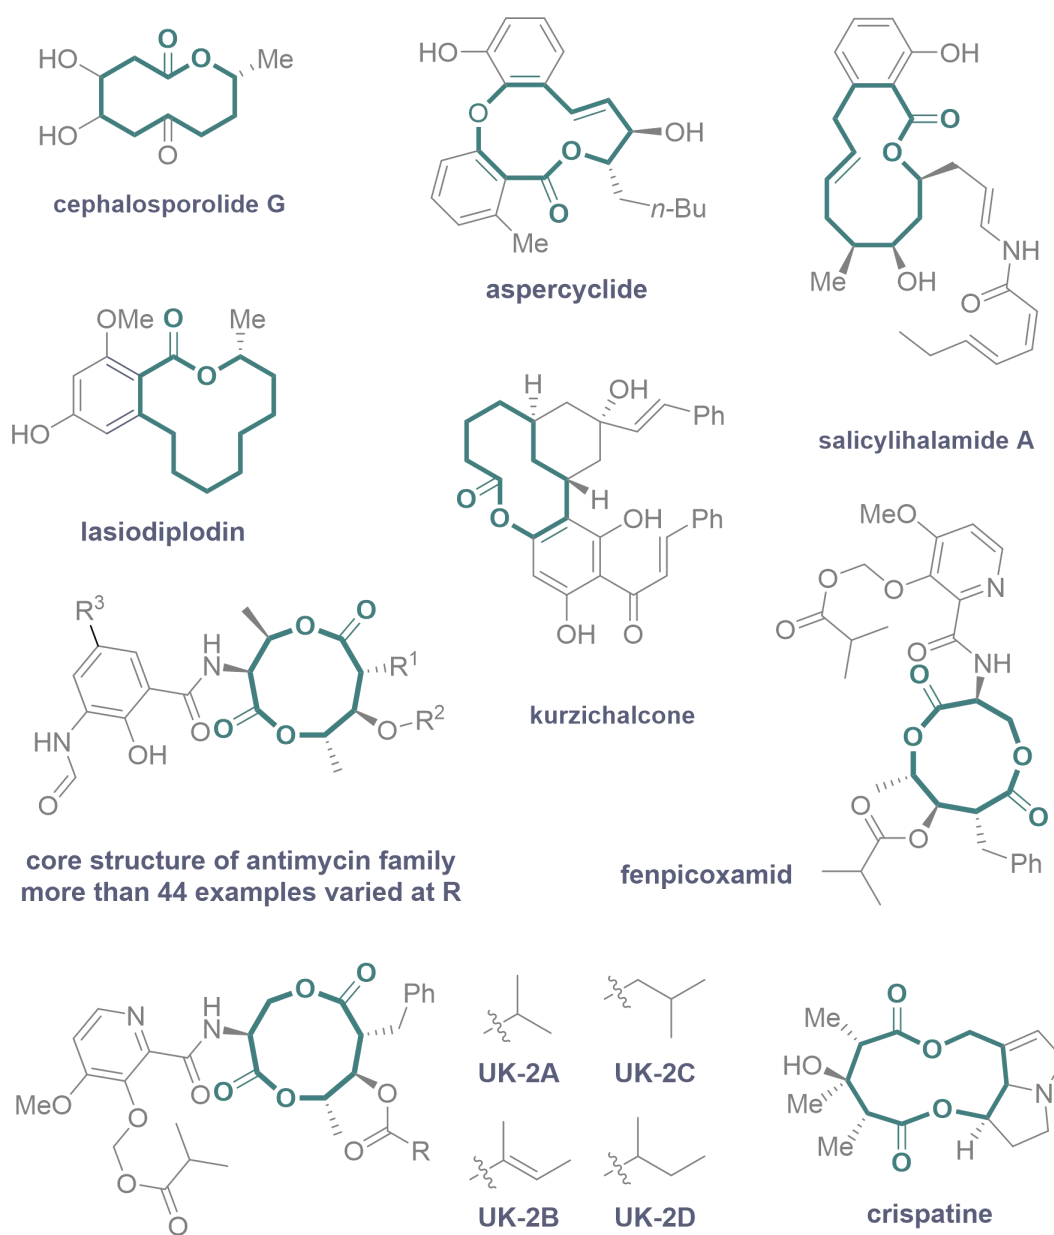

**Figure S1.** Bioactive molecules bearing a (bis-)lactone skeleton.

### 3. Optimisation Studies

**Table S1.** Optimisation of the cyclisation reaction of isatoic anhydride **1a** and VEC **2a** with 10 mol% of the palladium catalyst.<sup>a</sup>

Reaction scheme: Isatoic anhydride **1a** + VEC **2a**  $\xrightarrow[\text{solvent, rt, 4 h}]{[\text{Pd}] \text{ catalyst (10 mol\%)}}$  Product **3a**

**L1**

**L2**

**L3**

**L4**

**L5** n = 0

**L6** n = 1

**L7** n = 2

**L8**

**L9**

**L10**

| Entry          | [Pd]                                                  | Ligand      | Solvent           | Yield (%) <sup>b</sup> |
|----------------|-------------------------------------------------------|-------------|-------------------|------------------------|
| 1              | Pd(PPh <sub>3</sub> ) <sub>4</sub>                    | -           | THF               | 33                     |
| 2              | Pd(PPh <sub>3</sub> ) <sub>4</sub>                    | -           | MeCN              | -                      |
| 3              | Pd(PPh <sub>3</sub> ) <sub>4</sub>                    | -           | PhCl              | -                      |
| 4              | Pd(PPh <sub>3</sub> ) <sub>4</sub>                    | -           | DCM               | 62                     |
| 5              | Pd(PPh <sub>3</sub> ) <sub>4</sub>                    | -           | CHCl <sub>3</sub> | 58                     |
| 6              | Pd(PPh <sub>3</sub> ) <sub>4</sub>                    | -           | toluene           | 45                     |
| 7              | Pd <sub>2</sub> (dba) <sub>3</sub> ·CHCl <sub>3</sub> | <b>L1</b>   | DCM               | 19                     |
| 8              | Pd <sub>2</sub> (dba) <sub>3</sub> ·CHCl <sub>3</sub> | <b>L2</b>   | DCM               | 16                     |
| 9 <sup>c</sup> | Pd <sub>2</sub> (dba) <sub>3</sub> ·CHCl <sub>3</sub> | <b>L3-8</b> | DCM               | <5                     |
| 10             | Pd <sub>2</sub> (dba) <sub>3</sub> ·CHCl <sub>3</sub> | <b>L9</b>   | DCM               | 56                     |
| 11             | Pd <sub>2</sub> (dba) <sub>3</sub> ·CHCl <sub>3</sub> | <b>L10</b>  | DCM               | 59                     |

<sup>a</sup> Unless otherwise noted, reactions were performed with 0.10 mmol of **1a**, 0.15 mmol of **2a**, 10 mol% of the palladium catalyst in 1.0 mL of solvent at room temperature for 4 hours, the Pd/ligand complex was pre-prepared with Pd<sub>2</sub>(dba)<sub>3</sub>·CHCl<sub>3</sub> and ligand in solvent at rt for 1 h. <sup>b</sup> Isolated yield. <sup>c</sup> The reaction was performed for 12 hours. Pd<sub>2</sub>(dba)<sub>3</sub>: tris(dibenzylideneacetone)dipalladium.



**Table S2.** Optimisation of the cyclisation reaction of isatoic anhydride **1a** and VEC **2a** with 5 mol% of the palladium catalyst.<sup>a</sup>

Reaction scheme: **1a** + **2a**  $\xrightarrow[\text{solvent, rt, 4 h}]{\text{[Pd] catalyst (5 mol%)}}$  **3a**

Ligand structures: **L1** (tris(4-methoxyphenyl)phosphine), **L2** (tris(2-furyl)phosphine), **L3** (tris(2-naphthyl)phosphine), **L4** (tris(2-methoxyphenyl)cyclohexylphosphine), **L5** ( $\text{Ph}_2\text{P}(\text{CH}_2)_n\text{PPh}_2$ ), **L6** ( $n=1$ ), **L7** ( $n=2$ ), **L8** (1,2-bis(diphenylphosphino)benzene), **L9** (1,3-bis(diphenylphosphino)benzene), **L10** (1,2-bis(diphenylphosphino)ethane).

| Entry           | [Pd]                                            | Ligand                                     | Solvent         | Yield (%) <sup>b</sup> |
|-----------------|-------------------------------------------------|--------------------------------------------|-----------------|------------------------|
| 1               | $\text{Pd}_2(\text{dba})_3 \cdot \text{CHCl}_3$ | <b>L1</b>                                  | DCM             | 28                     |
| 2               | $\text{Pd}_2(\text{dba})_3 \cdot \text{CHCl}_3$ | <b>L2</b>                                  | DCM             | 14                     |
| 3 <sup>c</sup>  | $\text{Pd}_2(\text{dba})_3 \cdot \text{CHCl}_3$ | <b>L3-8</b>                                | DCM             | <5                     |
| 4               | $\text{Pd}_2(\text{dba})_3 \cdot \text{CHCl}_3$ | <b>L9</b>                                  | DCM             | 42                     |
| 5               | $\text{Pd}_2(\text{dba})_3 \cdot \text{CHCl}_3$ | <b>L10</b>                                 | DCM             | 62                     |
| 6 <sup>d</sup>  | $\text{Pd}_2(\text{dba})_3 \cdot \text{CHCl}_3$ | <b>L10</b>                                 | DCM             | 49                     |
| 7 <sup>e</sup>  | $\text{Pd}_2(\text{dba})_3 \cdot \text{CHCl}_3$ | <b>L10</b>                                 | DCM             | 47                     |
| 8 <sup>f</sup>  | $\text{Pd}_2(\text{dba})_3 \cdot \text{CHCl}_3$ | <b>L10</b>                                 | DCM             | 61                     |
| 9 <sup>g</sup>  | $\text{Pd}_2(\text{dba})_3 \cdot \text{CHCl}_3$ | <b>L10</b>                                 | DCM             | 59                     |
| 10              | $\text{Pd}_2(\text{dba})_3 \cdot \text{CHCl}_3$ | <b>L10</b> /Mg( <i>t</i> BuO) <sub>2</sub> | DCM             | 58                     |
| 11              | $\text{Pd}_2(\text{dba})_3 \cdot \text{CHCl}_3$ | <b>L10</b> /Al( <i>i</i> PrO) <sub>3</sub> | DCM             | 62                     |
| 12              | $\text{Pd}_2(\text{dba})_3 \cdot \text{CHCl}_3$ | <b>L10</b> /Ti( <i>i</i> PrO) <sub>4</sub> | DCM             | 14                     |
| 13              | $\text{Pd}_2(\text{dba})_3 \cdot \text{CHCl}_3$ | <b>L10</b>                                 | toluene         | 95                     |
| 14              | $\text{Pd}_2(\text{dba})_3 \cdot \text{CHCl}_3$ | <b>L10</b>                                 | PhCl            | 68                     |
| 15              | $\text{Pd}_2(\text{dba})_3 \cdot \text{CHCl}_3$ | <b>L10</b>                                 | $\text{CHCl}_3$ | 56                     |
| 16 <sup>c</sup> | $\text{Pd}_2(\text{dba})_3 \cdot \text{CHCl}_3$ | <b>L10</b>                                 | MeCN            | <5                     |
| 17 <sup>c</sup> | $\text{Pd}_2(\text{dba})_3 \cdot \text{CHCl}_3$ | <b>L10</b>                                 | THF             | <5                     |
| 18 <sup>f</sup> | $\text{Pd}_2(\text{dba})_3 \cdot \text{CHCl}_3$ | <b>L10</b>                                 | toluene         | 72                     |
| 19              | $\text{Pd}_2(\text{dba})_3$                     | <b>L10</b>                                 | toluene         | 49                     |
| 20              | $\text{Pd}(\text{OAc})_2$                       | <b>L10</b>                                 | toluene         | 59                     |
| 21              | $\text{Pd}_2(\text{dba})_3 \cdot \text{CHCl}_3$ | -                                          | toluene         | -                      |

<sup>a</sup> Unless otherwise noted, reactions were performed with 0.10 mmol of **1a**, 0.15 mmol of **2a**, 5 mol% of the palladium catalyst in 1.0 mL of solvent at room temperature for 4 hours, the Pd/ligand complex was pre-prepared with  $\text{Pd}_2(\text{dba})_3 \cdot \text{CHCl}_3$  and ligand in solvent at rt for 1 h. <sup>b</sup> Isolated yield. <sup>c</sup> The reaction was performed for 12 hours. <sup>d</sup> The reaction was performed at 40 °C. <sup>e</sup> The reaction was performed at 60 °C. <sup>f</sup> 0.5 mL of solvent was used. <sup>g</sup> 0.25 mL of solvent was used.

**Table S3.** Optimisation of the cyclisation reaction of isatoic anhydride **1a** and VEC **2a**.<sup>a</sup>

$\text{1a} + \text{2a} \xrightarrow[\text{solvent, rt, 4 h}]{[\text{Pd}] \text{ catalyst (x mol\%)}} \text{5a}$

**L1**

**L2**

**L3**

**L4**

**L5** n = 0

**L6** n = 1

**L7** n = 2

**L8**

**L9**

**L10**

| Entry          | [Pd]                                                  | x mol% | Ligand      | Solvent           | Yield (%) <sup>b</sup> |
|----------------|-------------------------------------------------------|--------|-------------|-------------------|------------------------|
| 1              | Pd(PPh <sub>3</sub> ) <sub>4</sub>                    | 5      | -           | THF               | -                      |
| 2              | Pd(PPh <sub>3</sub> ) <sub>4</sub>                    | 5      | -           | MeCN              | -                      |
| 3              | Pd(PPh <sub>3</sub> ) <sub>4</sub>                    | 5      | -           | PhCl              | -                      |
| 4              | Pd(PPh <sub>3</sub> ) <sub>4</sub>                    | 5      | -           | DCM               | <5                     |
| 5              | Pd(PPh <sub>3</sub> ) <sub>4</sub>                    | 5      | -           | toluene           | <5                     |
| 6              | Pd(PPh <sub>3</sub> ) <sub>4</sub>                    | 5      | -           | CHCl <sub>3</sub> |                        |
| 7 <sup>c</sup> | Pd <sub>2</sub> (dba) <sub>3</sub> ·CHCl <sub>3</sub> | 2.5    | <b>L1-8</b> | toluene           | -                      |
| 8              | Pd <sub>2</sub> (dba) <sub>3</sub> ·CHCl <sub>3</sub> | 2.5    | <b>L9</b>   | toluene           | 59                     |
| 9              | Pd <sub>2</sub> (dba) <sub>3</sub> ·CHCl <sub>3</sub> | 2.5    | <b>L10</b>  | toluene           | 80                     |
| 10             | Pd <sub>2</sub> (dba) <sub>3</sub> ·CHCl <sub>3</sub> | 2.5    | <b>L10</b>  | THF               | 42                     |
| 11             | Pd <sub>2</sub> (dba) <sub>3</sub> ·CHCl <sub>3</sub> | 2.5    | <b>L10</b>  | MeCN              | -                      |
| 12             | Pd <sub>2</sub> (dba) <sub>3</sub> ·CHCl <sub>3</sub> | 2.5    | <b>L10</b>  | PhCl              | 14                     |
| 13             | Pd <sub>2</sub> (dba) <sub>3</sub> ·CHCl <sub>3</sub> | 2.5    | <b>L10</b>  | DCM               | -                      |
| 14             | Pd <sub>2</sub> (dba) <sub>3</sub> ·CHCl <sub>3</sub> | 2.5    | <b>L10</b>  | CHCl <sub>3</sub> | -                      |

<sup>a</sup> Unless otherwise noted, reactions were performed with 0.10 mmol of **1a**, 0.15 mmol of **2a**, 2.5 mol% of the palladium catalyst and 10 mol% of the ligand in 1.0 mL of solvent at room temperature for 4 hours. <sup>b</sup> Isolated yield. <sup>c</sup> The reaction was performed for 12 hours.

#### 4. General Procedure for the Cyclisation of Isatoic Anhydrides and VECs

General procedure for the synthesis of 11-membered lactones **3**

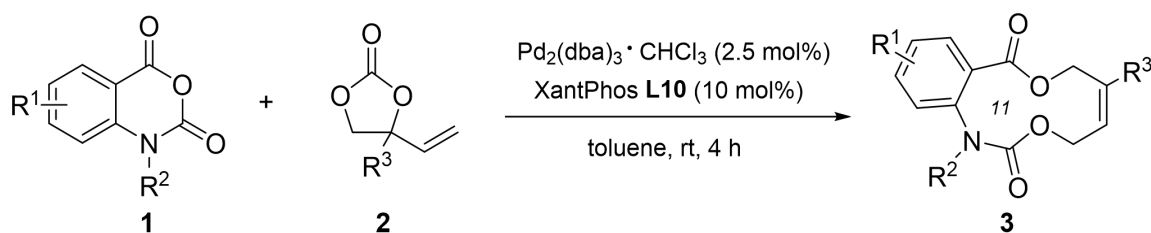

To an oven-dried Schlenk tube was added  $\text{Pd}_2(\text{dba})_3 \cdot \text{CHCl}_3$  (2.5 mol%) and XantPhos (10 mol%), after which the tube was evacuated and back-filled with argon three times. Then under the protection of argon, dry toluene (1.0 mL) was added and stirred at room temperature for 30 min. Subsequently, under the protection of argon, isatoic anhydrides **1** (0.10 mmol) and vinyl ethylene carbonates **2** (0.15 mmol) were added and the reaction mixture was stirred at room temperature for 4 hours. Then the mixture was directly purified by column chromatography on silica gel (petroleum ether/ dichloromethane = 3/1, then petroleum ether/ethyl acetate = 10/1 to 3/1) to afford the corresponding **3** in 68–95% yields, which were dried under vacuum and further analyzed by  $^1\text{H}$  NMR,  $^{13}\text{C}$  NMR, HRMS, *etc.* Influenced by the flexibility of medium-sized rings, the NMR analysis of the following compounds at room temperature met some spin splitting problems and couldn't provide the clear NMR spectra.

Gram-scale synthesis of the eleven-membered lactone **3a**

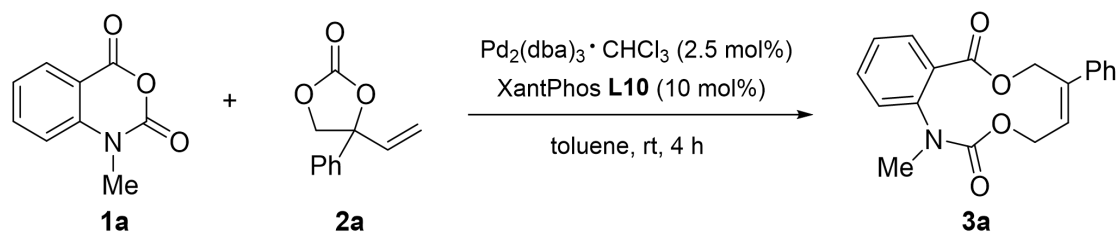

To an oven-dried 100 mL Schlenk flask, was added  $\text{Pd}_2(\text{dba})_3 \cdot \text{CHCl}_3$  (0.225 mmol, 0.233 g) and XantPhos (0.90 mmol, 0.521 g), after which the tube was evacuated and back-filled with argon three times. Then under the protection of argon, dry toluene (10 mL) was added and stirred at room temperature for 30 min. Subsequently, under the protection of argon, isatoic anhydride **1a** (6.00 mmol, 1.06 g) and vinyl ethylene carbonate **2a** (9.00 mmol, 1.71 g) were added and the reaction mixture was stirred at room temperature for 4 hours. Then the mixture was directly purified by column chromatography on silica gel (petroleum ether/

dichloromethane = 3/1, then petroleum ether/ethyl acetate = 10/1) to afford **3a** (0.81 g) as white solid in 76% yields.

**(Z)-1-methyl-6-phenyl-4,7-dihydro-2H-benzo[d][1,7]dioxo[3]azacycloundecine-2,9(1H)-dione 3a**

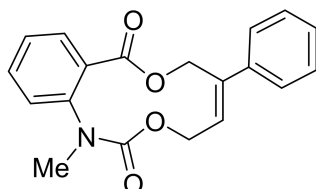

Prepared according to the general procedure to afford **3a** (30.7 mg, m. p. = 115 – 117 °C) in 95% yield as white solid.

*NMR and HRMS data for the product 3a:*

**<sup>1</sup>H NMR (600 MHz, CDCl<sub>3</sub>)** δ (ppm): 7.55 (d, *J* = 7.8 Hz, 1H), 7.48 – 7.44 (m, 3H), 7.38 – 7.35 (m, 2H), 7.33 – 7.31 (m, 1H), 7.24 – 7.23 (m, 2H), 6.08 (t, *J* = 7.2 Hz, 1H), 5.23 (br s, 2H), 4.67 (s, 2H), 3.42 (s, 3H).

**<sup>13</sup>C NMR (150 MHz, CDCl<sub>3</sub>)** δ (ppm): 167.8, 154.1, 145.7, 141.0, 140.7, 131.2, 130.0, 128.5, 128.1, 127.4, 126.7, 125.4, 124.5, 64.1, 61.5, 38.1.

**HRMS (ESI)** *m/z* calculated for C<sub>19</sub>H<sub>17</sub>NO<sub>4</sub>+Na<sup>+</sup>: 346.1050, found: 346.1047.

**(Z)-6-(4-fluorophenyl)-1-methyl-4,7-dihydro-2H-benzo[d][1,7]dioxo[3]azacycloundecine-2,9(1H)-dione 3b**

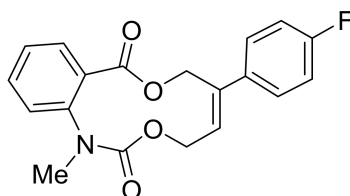

Prepared according to the general procedure to afford **3b** (26.6 mg) in 78% yield as colorless semisolid.

*NMR and HRMS data for the product 3b:*

**<sup>1</sup>H NMR (600 MHz, CDCl<sub>3</sub>)** δ (ppm): 7.55 (d, *J* = 7.2 Hz, 1H), 7.48 – 7.41 (m, 3H), 7.25 – 7.22 (m, 2H), 7.07 – 7.03 (m, 2H), 6.04 (t, *J* = 7.2 Hz, 1H), 5.19 (br s, 2H), 4.65 (s, 2H), 3.41 (s, 3H).

**<sup>13</sup>C NMR (150 MHz, CDCl<sub>3</sub>)** δ (ppm): 167.8, 162.7 (d, *J* = 245.6 Hz, 1C), 154.0, 144.7, 140.8,

137.1, 131.2, 130.0, 128.6 (d,  $J = 7.2$  Hz, 1C), 127.4, 125.4, 124.4 (d,  $J = 28.7$  Hz, 1C), 115.4 (d,  $J = 21.5$  Hz, 1C), 64.3, 61.3, 38.0.

**HRMS (ESI)**  $m/z$  calculated for  $C_{19}H_{16}FNO_4+Na^+$ : 364.0956, found: 364.0952.

**(Z)-6-(4-chlorophenyl)-1-methyl-4,7-dihydro-2H-benzo[d][1,7]dioxo[3]azacycloundecine-2,9(1H)-dione 3c**

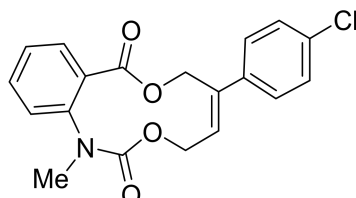

Prepared according to the general procedure to afford **3c** (32.9 mg, m. p. = 120 – 123 °C) in 92% yield as white solid.

*NMR and HRMS data for the product 3c:*

**$^1H$  NMR (600 MHz,  $CDCl_3$ )**  $\delta$  (ppm): 7.55 (d,  $J = 7.8$  Hz, 1H), 7.46 (t,  $J = 7.2$  Hz, 1H), 7.41 (d,  $J = 8.4$  Hz, 2H), 7.33 (d,  $J = 7.8$  Hz, 2H), 7.24 (d,  $J = 7.2$  Hz, 2H), 6.06 (t,  $J = 6.6$  Hz, 1H), 5.18 (br s, 2H), 4.65 (s, 2H), 3.41 (s, 3H).

**$^{13}C$  NMR (150 MHz,  $CDCl_3$ )**  $\delta$  (ppm): 167.8, 154.0, 144.5, 140.8, 139.5, 134.1, 131.3, 129.9, 128.7, 128.2, 127.4, 125.4, 124.9, 124.6, 64.1, 61.3, 38.0.

**HRMS (ESI)**  $m/z$  calculated for  $C_{19}H_{16}ClNO_4+Na^+$ : 380.0660( $^{35}Cl$ ), 382.0631 ( $^{37}Cl$ ), found: 380.0667, 382.0636.

**(Z)-6-(4-bromophenyl)-1-methyl-4,7-dihydro-2H-benzo[d][1,7]dioxo[3]azacycloundecine-2,9(1H)-dione 3d**

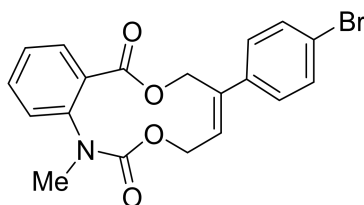

Prepared according to the general procedure to afford **3d** (35.0 mg, m. p. = 114 – 118 °C) in 87% yield as yellowish solid.

*NMR and HRMS data for the product 3d:*

**$^1H$  NMR (600 MHz,  $CDCl_3$ )**  $\delta$  (ppm): 7.55 (d,  $J = 7.2$  Hz, 1H), 7.50 – 7.43 (m, 3H), 7.34 (d,  $J = 7.2$  Hz, 2H), 7.25 – 7.21 (m, 2H), 6.06 (t,  $J = 6.6$  Hz, 1H), 5.17 (br s, 2H), 4.65 (s, 2H), 3.41

(s, 3H).

$^{13}\text{C}$  NMR (150 MHz,  $\text{CDCl}_3$ )  $\delta$  (ppm): 167.7, 154.0, 144.5, 140.8, 140.0, 131.6, 131.3, 129.9, 128.5, 127.4, 125.4, 124.9, 124.6, 122.3, 64.0, 61.2, 38.0.

HRMS (ESI)  $m/z$  calculated for  $\text{C}_{19}\text{H}_{16}\text{BrNO}_4+\text{Na}^+$ : 424.0155 ( $^{79}\text{Br}$ ), 426.0134 ( $^{81}\text{Br}$ ), found: 424.0159, 426.0141.

**(Z)-1-methyl-6-(p-tolyl)-4,7-dihydro-2H-benzo[d][1,7]dioxo[3]azacycloundecine-2,9(1H)-dione 3e**

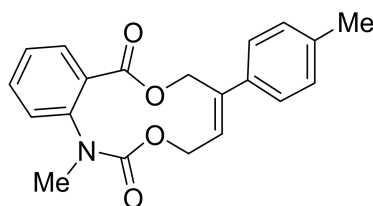

Prepared according to the general procedure to afford **3e** (31.3 mg, m. p. = 97 – 100 °C) in 93% yield as white solid.

*NMR and HRMS data for the product 3e:*

$^1\text{H}$  NMR (600 MHz,  $\text{CDCl}_3$ )  $\delta$  (ppm): 7.55 (d,  $J = 7.8$  Hz, 1H), 7.45 (t,  $J = 7.2$  Hz, 1H), 7.37 (d,  $J = 7.8$  Hz, 2H), 7.23 (d,  $J = 7.8$  Hz, 2H), 7.17 (d,  $J = 7.2$  Hz, 2H), 6.06 (t,  $J = 7.2$  Hz, 1H), 5.22 (br s, 2H), 4.65 (s, 2H), 3.42 (s, 3H), 2.36 (s, 3H).

$^{13}\text{C}$  NMR (150 MHz,  $\text{CDCl}_3$ )  $\delta$  (ppm): 167.9, 154.1, 145.7, 140.7, 138.0, 131.1, 130.0, 129.2, 128.0, 127.4, 126.6, 125.3, 124.5, 123.6, 64.0, 61.6, 38.1, 21.1.

HRMS (ESI)  $m/z$  calculated for  $\text{C}_{20}\text{H}_{19}\text{NO}_4+\text{Na}^+$ : 360.1206, found: 360.1215.

**(Z)-6-(4-ethylphenyl)-1-methyl-4,7-dihydro-2H-benzo[d][1,7]dioxo[3]azacycloundecine-2,9(1H)-dione 3f**

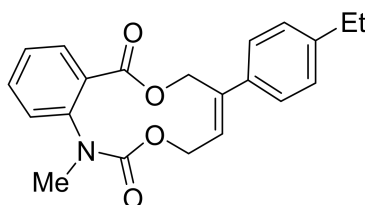

Prepared according to the general procedure to afford **3f** (31.6 mg) in 90% yield as colorless semisolid.

*NMR and HRMS data for the product 3f:*

$^1\text{H}$  NMR (600 MHz,  $\text{CDCl}_3$ )  $\delta$  (ppm): 7.54 (d,  $J = 7.2$  Hz, 1H), 7.45 (t,  $J = 7.2$  Hz, 1H), 7.40

(d,  $J = 7.2$  Hz, 2H), 7.23 (d,  $J = 7.2$  Hz, 2H), 7.19 (d,  $J = 7.8$  Hz, 2H), 6.07 (t,  $J = 7.2$  Hz, 1H), 5.22 (br s, 2H), 4.65 (s, 2H), 3.41 (s, 3H), 2.65 (q,  $J = 7.8$  Hz, 2H), 1.23 (t,  $J = 7.2$  Hz, 3H).

$^{13}\text{C}$  NMR (150 MHz,  $\text{CDCl}_3$ )  $\delta$  (ppm): 167.9, 154.2, 145.7, 144.5, 140.7, 138.3, 131.2, 130.0, 128.0, 127.4, 126.7, 125.4, 124.5, 123.7, 64.0, 61.6, 38.1, 28.5, 15.5.

HRMS (ESI)  $m/z$  calculated for  $\text{C}_{21}\text{H}_{21}\text{NO}_4 + \text{Na}^+$ : 374.1363, found: 374.1360.

**(Z)-6-(4-*iso*-propylphenyl)-1-methyl-4,7-dihydro-2H-benzo[d][1,7]dioxo[3]azacycloundecine-2,9(1H)-dione 3g**

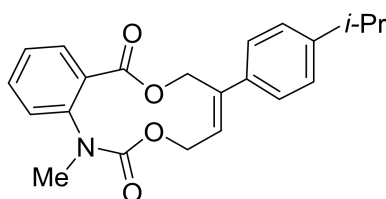

Prepared according to the general procedure to afford **3g** (32.5 mg) in 89% yield as colorless semisolid.

NMR and HRMS data for the product **3g**:

$^1\text{H}$  NMR (600 MHz,  $\text{CDCl}_3$ )  $\delta$  (ppm): 7.54 (d,  $J = 6.6$  Hz, 1H), 7.47 – 7.40 (m, 3H), 7.24 – 7.21 (m, 4H), 6.07 (t,  $J = 6.0$  Hz, 1H), 5.23 (br s, 2H), 4.66 (s, 2H), 3.41 (s, 3H), 2.95 – 2.87 (m, 1H), 1.25 (d,  $J = 7.2$  Hz, 6H).

$^{13}\text{C}$  NMR (150 MHz,  $\text{CDCl}_3$ )  $\delta$  (ppm): 167.9, 154.2, 149.1, 145.7, 140.8, 138.4, 131.1, 130.1, 127.4, 126.7, 126.6, 125.3, 124.5, 123.7, 64.0, 61.6, 38.1, 33.8, 23.9.

HRMS (ESI)  $m/z$  calculated for  $\text{C}_{22}\text{H}_{23}\text{NO}_4 + \text{Na}^+$ : 388.1519, found: 388.1519.

**(Z)-6-(4-methoxyphenyl)-1-methyl-4,7-dihydro-2H-benzo[d][1,7]dioxo[3]azacycloundecine-2,9(1H)-dione 3h**

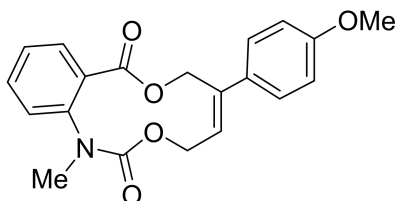

Prepared according to the general procedure to afford **3h** (32.8 mg) in 93% yield as colorless semisolid.

NMR and HRMS data for the product **3h**:

$^1\text{H}$  NMR (600 MHz,  $\text{CDCl}_3$ )  $\delta$  (ppm): 7.53 (d,  $J = 7.8$  Hz, 1H), 7.47 – 7.37 (m, 3H), 7.23 (d,  $J$

= 7.8 Hz, 2H), 6.89 (d,  $J = 9.0$  Hz, 2H), 6.03 (t,  $J = 7.2$  Hz, 1H), 5.20 (br s, 2H), 4.64 (s, 2H), 3.81 (s, 3H), 3.41 (s, 3H).

$^{13}\text{C}$  NMR (150 MHz,  $\text{CDCl}_3$ )  $\delta$  (ppm): 167.9, 159.6, 154.2, 145.5, 140.7, 133.4, 131.1, 130.0, 127.9, 127.4, 125.3, 124.5, 122.8, 113.9, 64.0, 61.6, 55.3, 38.1.

HRMS (ESI)  $m/z$  calculated for  $\text{C}_{20}\text{H}_{19}\text{NO}_5 + \text{Na}^+$ : 376.1155, found: 376.1158.

**(Z)-6-(3-fluorophenyl)-1-methyl-4,7-dihydro-2H-benzo[d][1,7]dioxo[3]azacycloundecine-2,9(1H)-dione 3i**

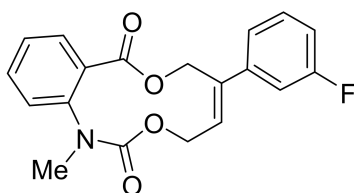

Prepared according to the general procedure to afford **3i** (28.0 mg) in 82% yield as colorless semisolid.

*NMR and HRMS data for the product 3i:*

$^1\text{H}$  NMR (600 MHz,  $\text{CDCl}_3$ )  $\delta$  (ppm): 7.56 (d,  $J = 7.8$  Hz, 1H), 7.46 (t,  $J = 7.2$  Hz, 1H), 7.35 – 7.30 (m, 1H), 7.25 – 7.23 (m, 3H), 7.19 (d,  $J = 9.6$  Hz, 1H), 7.01 (td,  $J = 8.4, 2.4$  Hz, 1H), 6.10 (t,  $J = 7.2$  Hz, 1H), 5.19 (br s, 2H), 4.66 (s, 2H), 3.41 (s, 3H).

$^{13}\text{C}$  NMR (150 MHz,  $\text{CDCl}_3$ )  $\delta$  (ppm): 167.8, 165.5 (d,  $J = 224.2$  Hz, 1C), 154.0, 144.5, 143.3 (d,  $J = 8.6$  Hz, 1C), 140.8, 131.3, 130.0 (d,  $J = 8.6$  Hz, 1C), 129.9, 127.5, 125.4 (d,  $J = 8.6$  Hz, 1C), 124.6, 122.5, 115.1 (d,  $J = 20.1$  Hz, 1C), 113.9 (d,  $J = 21.5$  Hz, 1C), 64.0, 61.2, 38.0.

HRMS (ESI)  $m/z$  calculated for  $\text{C}_{19}\text{H}_{16}\text{FNO}_4 + \text{H}^+$ : 342.1136, found: 342.1133.

**(Z)-6-(3-chlorophenyl)-1-methyl-4,7-dihydro-2H-benzo[d][1,7]dioxo[3]azacycloundecine-2,9(1H)-dione 3j**

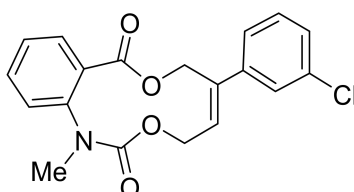

Prepared according to the general procedure to afford **3j** (32.6 mg, m. p. = 121 – 127 °C) in 91% yield as yellowish solid.

*NMR and HRMS data for the product 3j:*



**<sup>1</sup>H NMR (600 MHz, CDCl<sub>3</sub>)** δ (ppm): 7.56 (d, *J* = 7.2 Hz, 1H), 7.51 – 7.43 (m, 2H), 7.38 – 7.32 (m, 1H), 7.31 – 7.28 (m, 2H), 7.25 – 7.22 (m, 2H), 6.08 (t, *J* = 7.2 Hz, 1H), 5.18 (br s, 2H), 4.66 (s, 2H), 3.42 (s, 3H).

**<sup>13</sup>C NMR (150 MHz, CDCl<sub>3</sub>)** δ (ppm): 167.8, 154.0, 144.3, 142.9, 140.8, 134.4, 131.3, 129.9, 129.8, 128.2, 127.5, 127.0, 125.5, 125.1, 124.6, 64.0, 61.2, 38.0.

**HRMS (ESI)** *m/z* calculated for C<sub>19</sub>H<sub>16</sub>ClNO<sub>4</sub>+Na<sup>+</sup>: 380.0660(<sup>35</sup>Cl), 382.0631 (<sup>37</sup>Cl), found: 380.0656, 382.0618.

**(Z)-6-(3-bromophenyl)-1-methyl-4,7-dihydro-2H-benzo[d][1,7]dioxo[3]azacycloundecine-2,9(1H)-dione 3k**

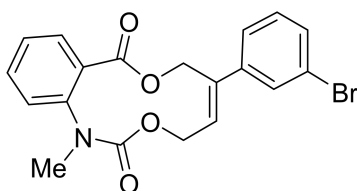

Prepared according to the general procedure to afford **3k** (35.0 mg, m. p. = 123 – 127 °C) in 87% yield as white solid.

*NMR and HRMS data for the product 3:*

**<sup>1</sup>H NMR (600 MHz, CDCl<sub>3</sub>)** δ (ppm): 7.62 (s, 1H), 7.56 (d, *J* = 7.8 Hz, 1H), 7.50 – 7.44 (m, 2H), 7.40 (d, *J* = 7.8 Hz, 1H), 7.25 – 7.21 (m, 3H), 6.07 (t, *J* = 7.2 Hz, 1H), 5.17 (br s, 2H), 4.65 (s, 2H), 3.41 (s, 3H).

**<sup>13</sup>C NMR (150 MHz, CDCl<sub>3</sub>)** δ (ppm): 167.7, 154.0, 144.1, 143.1, 140.8, 131.3, 131.1, 130.0, 129.9, 127.5, 125.5, 125.4, 124.5, 122.5, 64.0, 61.2, 38.0.

**HRMS (ESI)** *m/z* calculated for C<sub>19</sub>H<sub>16</sub>BrNO<sub>4</sub>+Na<sup>+</sup>: 424.0155 (<sup>79</sup>Br), 426.0134 (<sup>81</sup>Br), found: 424.0154, 426.0138.

**(Z)-6-(3-methoxyphenyl)-1-methyl-4,7-dihydro-2H-benzo[d][1,7]dioxo[3]azacycloundecine-2,9(1H)-dione 3l**

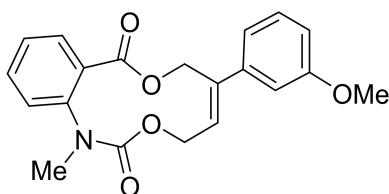

Prepared according to the general procedure to afford **3l** (31.8 mg) in 90% yield as colorless

semisolid.

*NMR and HRMS data for the product 3l:*

**<sup>1</sup>H NMR (600 MHz, CDCl<sub>3</sub>)** δ (ppm): 7.56 (d, *J* = 7.2 Hz, 1H), 7.46 (t, *J* = 7.2 Hz, 1H), 7.28 (d, *J* = 8.4 Hz, 1H), 7.23 (d, *J* = 8.4 Hz, 2H), 7.05 (d, *J* = 7.8 Hz, 1H), 7.01 (s, 1H), 6.87 (dd, *J* = 8.4, 2.4 Hz, 1H), 6.09 (t, *J* = 6.0 Hz, 1H), 5.22 (br s, 2H), 4.66 (s, 2H), 3.83 (s, 3H), 3.42 (s, 3H).

**<sup>13</sup>C NMR (150 MHz, CDCl<sub>3</sub>)** δ (ppm): 167.8, 159.6, 154.1, 145.5, 142.5, 140.8, 131.2, 129.9, 129.5, 127.5, 125.4, 124.5, 119.2, 113.5, 112.5, 64.1, 61.5, 55.3, 38.1.

**HRMS (ESI)** *m/z* calculated for C<sub>20</sub>H<sub>19</sub>NO<sub>5</sub>+Na<sup>+</sup>: 376.1155, found: 376.1150.

**(Z)-6-(2-fluorophenyl)-1-methyl-4,7-dihydro-2H-benzo[d][1,7]dioxo[3]azacycloundecine-2,9(1H)-dione 3m**

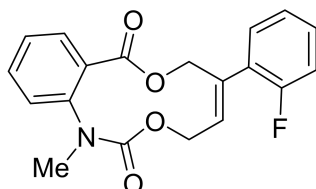

Prepared according to the general procedure to afford **3m** (29.3 mg) in 86% yield as colorless semisolid.

*NMR and HRMS data for the product 3m:*

**<sup>1</sup>H NMR (600 MHz, CDCl<sub>3</sub>)** δ (ppm): 7.54 (d, *J* = 7.2 Hz, 1H), 7.48 – 7.38 (m, 2H), 7.31 – 7.27 (m, 1H), 7.25 – 7.20 (m, 2H), 7.15 (t, *J* = 7.2 Hz, 1H), 7.05 (t, *J* = 9.0 Hz, 1H), 6.08 (t, *J* = 6.6 Hz, 1H), 5.15 (br s, 2H), 4.67 (s, 2H), 3.43 (s, 3H).

**<sup>13</sup>C NMR (150 MHz, CDCl<sub>3</sub>)** δ (ppm): 167.6, 159.5 (d, *J* = 245.6 Hz, 1C), 154.0, 140.8 (d, *J* = 15.8 Hz, 1C), 131.2, 130.5, 130.1, 129.7 (d, *J* = 14.4 Hz, 1C), 129.2 (d, *J* = 14.4 Hz, 1C), 127.4, 127.2, 125.4, 124.5, 124.4, 115.5 (d, *J* = 21.6 Hz, 1C), 64.2 (d, *J* = 4.2 Hz, 1C), 61.2, 37.9.

**HRMS (ESI)** *m/z* calculated for C<sub>19</sub>H<sub>16</sub>FNO<sub>4</sub>+Na<sup>+</sup>: 364.0956, found: 364.0958.

**(Z)-6-(2-chlorophenyl)-1-methyl-4,7-dihydro-2H-benzo[d][1,7]dioxo[3]azacycloundecine-2,9(1H)-dione 3n**

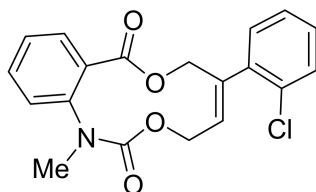

Prepared according to the general procedure to afford **3n** (27.9 mg) in 78% yield as colorless semisolid.

*NMR and HRMS data for the product 3n:*

**<sup>1</sup>H NMR (600 MHz, CDCl<sub>3</sub>)** δ (ppm): 7.55 (d, *J* = 7.2 Hz, 1H), 7.49 – 7.45 (m, 2H), 7.36 (d, *J* = 8.4 Hz, 1H), 7.28 – 7.20 (m, 4H), 5.94 (t, *J* = 6.6 Hz, 1H), 5.12 (br s, 2H), 4.68 (s, 2H), 3.43 (s, 3H).

**<sup>13</sup>C NMR (150 MHz, CDCl<sub>3</sub>)** δ (ppm): 167.6, 154.0, 143.5, 141.0, 131.8, 131.3, 131.2, 130.1, 129.2, 129.1, 127.7, 127.3, 127.1, 125.4, 124.6, 64.4, 61.2, 37.9.

**HRMS (ESI)** *m/z* calculated for C<sub>19</sub>H<sub>16</sub>ClNO<sub>4</sub>+Na<sup>+</sup>: 380.0660(<sup>35</sup>Cl), 382.0631 (<sup>37</sup>Cl), found: 380.0656, 382.0618.

**(Z)-6-(2-bromophenyl)-1-methyl-4,7-dihydro-2H-benzo[d][1,7]dioxo[3]azacycloundecine-2,9(1H)-dione 3o**

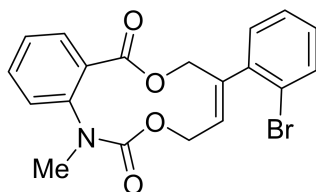

Prepared according to the general procedure to afford **3o** (30.2 mg) in 75% yield as colorless semisolid.

*NMR and HRMS data for the product 3o:*

**<sup>1</sup>H NMR (600 MHz, CDCl<sub>3</sub>)** δ (ppm): 7.55 (d, *J* = 7.8 Hz, 2H), 7.49 – 7.43 (m, 2H), 7.32 (t, *J* = 7.2 Hz, 1H), 7.26 – 7.21 (m, 2H), 7.17 (t, *J* = 7.2 Hz, 1H), 5.90 (t, *J* = 6.6 Hz, 1H), 5.11 (br s, 2H), 4.68 (s, 2H), 3.43 (s, 3H).

**<sup>13</sup>C NMR (150 MHz, CDCl<sub>3</sub>)** δ (ppm): 167.6, 154.0, 144.6, 142.9, 141.0, 132.3, 131.3, 131.3, 130.0, 129.2, 127.7, 127.6, 127.1, 125.4, 124.5, 121.6, 64.4, 61.1, 37.9.

**HRMS (ESI)** *m/z* calculated for C<sub>19</sub>H<sub>16</sub>BrNO<sub>4</sub>+H<sup>+</sup>: 402.0335 (<sup>79</sup>Br), 404.0315 (<sup>81</sup>Br), found: 402.0342, 404.0306.

**(Z)-1-methyl-6-(2-nitrophenyl)-4,7-dihydro-2H-benzo[d][1,7]dioxo[3]azacycloundecine-2,9(1H)-dione 3p**

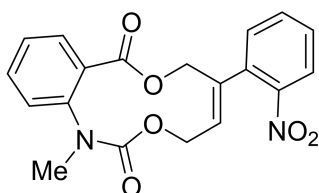

Prepared according to the general procedure to afford **3p** (34.2 mg) in 93% yield as colorless semisolid.

*NMR and HRMS data for the product 3p:*

**<sup>1</sup>H NMR (600 MHz, CDCl<sub>3</sub>)** δ (ppm): 8.00 (d, *J* = 7.2 Hz, 1H), 7.72 (d, *J* = 7.8 Hz, 1H), 7.65 (t, *J* = 7.8 Hz, 1H), 7.55 – 7.42 (m, 3H), 7.27 – 7.21 (m, 2H), 5.88 (t, *J* = 7.2 Hz, 1H), 5.12 (br s, 2H), 4.61 (s, 2H), 3.42 (s, 3H).

**<sup>13</sup>C NMR (150 MHz, CDCl<sub>3</sub>)** δ (ppm): 167.9, 153.9, 147.5, 143.2, 140.9, 137.3, 133.7, 132.5, 131.2, 130.6, 128.8, 127.2, 125.5, 125.3, 124.5, 124.1, 65.1, 60.8, 37.7

**HRMS (ESI)** *m/z* calculated for C<sub>19</sub>H<sub>16</sub>N<sub>2</sub>O<sub>6</sub>+Na<sup>+</sup>: 391.0901, found: 391.0902.

**(Z)-1-methyl-6-(*o*-tolyl)-4,7-dihydro-2H-benzo[d][1,7]dioxo[3]azacycloundecine-2,9(1H)-dione 3q**

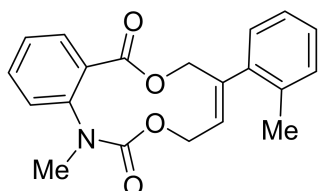

Prepared according to the general procedure to afford **3q** (25.6 mg) in 76% yield as colorless semisolid.

*NMR and HRMS data for the product 3q:*

**<sup>1</sup>H NMR (600 MHz, CDCl<sub>3</sub>)** δ (ppm): 7.63 (d, *J* = 7.8 Hz, 1H), 7.49 (t, *J* = 7.2 Hz, 1H), 7.29 – 7.23 (m, 3H), 7.22 – 7.16 (m, 3H), 5.70 (t, *J* = 6.0 Hz, 1H), 5.01 (br s, 2H), 4.68 (s, 2H), 3.45 (s, 3H), 2.35 (s, 3H).

**<sup>13</sup>C NMR (150 MHz, CDCl<sub>3</sub>)** δ (ppm): 167.6, 154.1, 143.5, 141.3, 135.3, 131.6, 130.3, 129.4, 128.9, 128.3, 127.7, 125.8, 125.5, 125.4, 124.5, 64.7, 61.6, 38.0, 19.8.

**HRMS (ESI)** *m/z* calculated for C<sub>20</sub>H<sub>19</sub>NO<sub>4</sub>+Na<sup>+</sup>: 360.1206, found: 360.1207.

**(Z)-6-(3,4-dichlorophenyl)-1-methyl-4,7-dihydro-2H-benzo[d][1,7]dioxo[3]azacycloundecine-2,9(1H)-dione 3r**

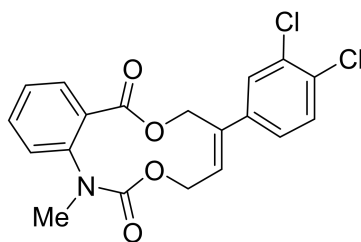

Prepared according to the general procedure to afford **3r** (34.5 mg) in 88% yield as colorless semisolid.

*NMR and HRMS data for the product 3r:*

**<sup>1</sup>H NMR (600 MHz, CDCl<sub>3</sub>)** δ (ppm): 7.60 – 7.52 (m, 2H), 7.47 (t, *J* = 7.2 Hz, 1H), 7.43 (d, *J* = 8.4 Hz, 1H), 7.31 (d, *J* = 7.8 Hz, 1H), 7.24 (d, *J* = 8.4 Hz, 2H), 6.08 (t, *J* = 6.6 Hz, 1H), 5.14 (br s, 2H), 4.65 (s, 2H), 3.41 (s, 3H).

**<sup>13</sup>C NMR (150 MHz, CDCl<sub>3</sub>)** δ (ppm): 167.7, 153.9, 143.3, 141.1, 140.8, 132.6, 132.2, 131.4, 130.4, 129.8, 128.8, 127.4, 126.3, 125.8, 125.5, 124.6, 64.0, 61.0, 38.0.

**HRMS (ESI)** *m/z* calculated for C<sub>19</sub>H<sub>15</sub>Cl<sub>2</sub>NO<sub>4</sub>+Na<sup>+</sup>: 414.0270 (<sup>35</sup>Cl), 416.0241 (<sup>37</sup>Cl), found: 414.0273, 416.0249.

**(Z)-6-(3,4-dimethoxyphenyl)-1-methyl-4,7-dihydro-2H-benzo[d][1,7]dioxo[3]azacycloundecine-2,9(1H)-dione 3s**

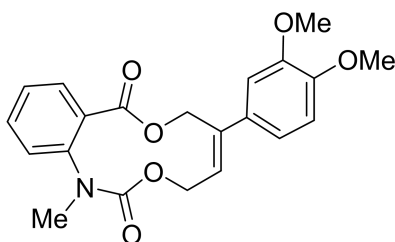

Prepared according to the general procedure to afford **3s** (27.6 mg) in 72% yield as colorless semisolid.

*NMR and HRMS data for the product 3s:*

**<sup>1</sup>H NMR (600 MHz, CDCl<sub>3</sub>)** δ (ppm): 7.54 (d, *J* = 7.2 Hz, 1H), 7.45 (t, *J* = 7.2 Hz, 1H), 7.23 (d, *J* = 7.8 Hz, 2H), 7.08 – 6.96 (m, 2H), 6.85 (d, *J* = 8.4 Hz, 1H), 6.04 (t, *J* = 6.6 Hz, 1H), 5.21 (br s, 2H), 4.65 (s, 2H), 3.90 (s, 3H), 3.88 (s, 3H), 3.41 (s, 3H).

**<sup>13</sup>C NMR (150 MHz, CDCl<sub>3</sub>)** δ (ppm): 167.9, 154.1, 149.2, 148.8, 145.5, 140.7, 133.8, 131.2, 130.0, 127.4, 125.4, 124.5, 123.0, 119.4, 110.9, 110.0, 64.2, 61.6, 55.9, 38.0, 29.7.

HRMS (ESI)  $m/z$  calculated for  $C_{21}H_{21}NO_6+Na^+$ : 406.1261, found: 406.1257.

**(Z)-6-(2,4-dichlorophenyl)-1-methyl-4,7-dihydro-2H-benzo[d][1,7]dioxo[3]azacycloundecine-2,9(1H)-dione 3t**

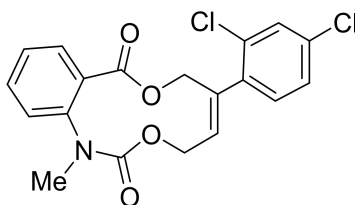

Prepared according to the general procedure to afford **3t** (28.2 mg, m. p. = 112 – 117 °C) in 72% yield as white solid.

*NMR and HRMS data for the product 3t:*

$^1H$  NMR (600 MHz,  $CDCl_3$ )  $\delta$  (ppm): 7.54 (d,  $J = 7.8$  Hz, 1H), 7.48 (t,  $J = 7.2$  Hz, 1H), 7.43 – 7.35 (m, 2H), 7.29 – 7.23 (m, 3H), 5.93 (t,  $J = 6.6$  Hz, 1H), 5.06 (br s, 2H), 4.66 (s, 2H), 3.43 (s, 3H).

$^{13}C$  NMR (150 MHz,  $CDCl_3$ )  $\delta$  (ppm): 167.6, 154.0, 142.3, 141.0, 139.5, 134.3, 132.6, 132.1, 131.4, 130.1, 129.0, 127.8, 127.6, 127.4, 125.5, 124.6, 64.4, 61.0, 37.8.

HRMS (ESI)  $m/z$  calculated for  $C_{19}H_{15}Cl_2NO_4+Na^+$ : 414.0270 ( $^{35}Cl$ ), 416.0241 ( $^{37}Cl$ ), found: 414.0274, 416.0248.

**(Z)-6-(2,5-dichlorophenyl)-1-methyl-4,7-dihydro-2H-benzo[d][1,7]dioxo[3]azacycloundecine-2,9(1H)-dione 3u**

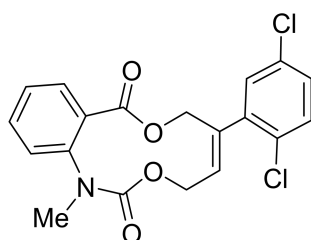

Prepared according to the general procedure to afford **3u** (26.7 mg) in 68% yield as colorless semisolid.

*NMR and HRMS data for the product 3u:*

$^1H$  NMR (600 MHz,  $CDCl_3$ )  $\delta$  (ppm): 7.56 (d,  $J = 6.6$  Hz, 1H), 7.50 – 7.47 (m, 2H), 7.30 – 7.27 (m, 2H), 7.25 – 7.22 (m, 2H), 5.93 (t,  $J = 6.0$  Hz, 1H), 5.07 (br s, 2H), 4.67 (s, 2H), 3.44 (s, 3H).

<sup>13</sup>C NMR (150 MHz, CDCl<sub>3</sub>) δ (ppm): 167.5, 154.0, 142.3, 142.1, 141.0, 132.9, 131.4, 130.9, 130.4, 130.3, 129.8, 129.2, 128.0, 127.8, 125.5, 124.6, 64.1, 60.9, 37.9.

HRMS (ESI) m/z calculated for C<sub>19</sub>H<sub>15</sub>Cl<sub>2</sub>NO<sub>4</sub>+Na<sup>+</sup>: 414.0270 (<sup>35</sup>Cl), 416.0241 (<sup>37</sup>Cl), found: 414.0274, 416.0253.

**(Z)-1-methyl-6-(naphthalen-2-yl)-4,7-dihydro-2H-benzo[d][1,7]dioxo[3]azacycloundecine-2,9(1H)-dione 3v**

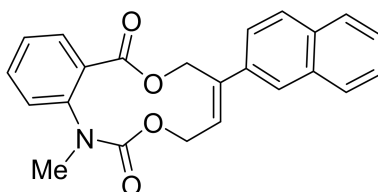

Prepared according to the general procedure to afford **3v** (29.8 mg, m. p. = 118 – 122 °C) in 80% yield as white solid.

*NMR and HRMS data for the product 3v:*

<sup>1</sup>H NMR (600 MHz, CDCl<sub>3</sub>) δ (ppm): 7.92 (s, 1H), 7.89 – 7.80 (m, 4H), 7.60 (t, *J* = 7.8 Hz, 2H), 7.51 – 7.43 (m, 3H), 7.24 – 7.21 (m, 1H), 6.22 (t, *J* = 6.6 Hz, 1H), 5.34 (br s, 2H), 4.73 (s, 2H), 3.44 (s, 3H).

<sup>13</sup>C NMR (150 MHz, CDCl<sub>3</sub>) δ (ppm): 167.9, 154.2, 145.6, 140.8, 138.3, 133.2, 133.0, 131.2, 130.0, 128.2, 127.6, 126.4, 126.3, 125.8, 125.4, 124.9, 124.8, 124.6, 64.1, 61.6, 38.1.

HRMS (ESI) m/z calculated for C<sub>23</sub>H<sub>19</sub>NO<sub>4</sub>+Na<sup>+</sup>: 396.1206, found: 396.1216.

**(Z)-6-([1,1'-biphenyl]-4-yl)-1-methyl-4,7-dihydro-2H-benzo[d][1,7]dioxo[3]azacycloundecine-2,9(1H)-dione 3w**

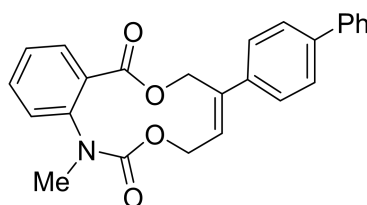

Prepared according to the general procedure to afford **3w** (33.9 mg, m. p. = 177 – 179 °C) in 85% yield as white solid.

*NMR and HRMS data for the product 3w:*

<sup>1</sup>H NMR (600 MHz, CDCl<sub>3</sub>) δ (ppm): 7.64 – 7.59 (m, 4H), 7.56 – 7.55 (m, 3H), 7.46 – 7.44 (m, 3H), 7.36 (t, *J* = 7.2 Hz, 1H), 7.25 – 7.21 (m, 2H), 6.15 (t, *J* = 6.6 Hz, 1H), 5.28 (br s, 2H),

4.69 (s, 2H), 3.43 (s, 3H).

$^{13}\text{C}$  NMR (150 MHz,  $\text{CDCl}_3$ )  $\delta$  (ppm): 167.9, 154.1, 145.3, 141.0, 140.8, 140.5, 139.9, 131.2, 130.0, 128.8, 127.5, 127.2, 127.2, 127.0, 125.4, 124.6, 124.4, 64.0, 61.5, 38.1.

HRMS (ESI)  $m/z$  calculated for  $\text{C}_{25}\text{H}_{21}\text{NO}_4+\text{Na}^+$ : 422.1363, found: 422.1359.

**(Z)-12-fluoro-1-methyl-6-phenyl-4,7-dihydro-2H-benzo[d][1,7]dioxo[3]azacycloundecine-2,9(1H)-dione 3x**

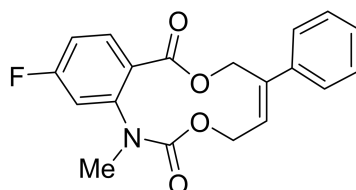

Prepared according to the general procedure to afford **3x** (30.7 mg) in 90% yield as colorless semisolid.

*NMR and HRMS data for the product 3x:*

$^1\text{H}$  NMR (600 MHz,  $\text{CDCl}_3$ )  $\delta$  (ppm): 7.58 (br s, 1H), 7.46 (d,  $J = 7.8$  Hz, 2H), 7.37 (t,  $J = 7.8$  Hz, 2H), 7.34 – 7.31 (m, 1H), 6.97 – 6.92 (m, 2H), 6.05 (br s, 1H), 5.23 (br s, 2H), 4.68 (s, 2H), 3.41 (s, 3H).

$^{13}\text{C}$  NMR (150 MHz,  $\text{CDCl}_3$ )  $\delta$  (ppm): 167.1, 163.9 (d,  $J = 249.9$  Hz, 1C), 153.9, 145.6, 143.0, 140.9, 129.6, 128.5, 128.2, 126.7, 125.9, 124.3, 112.3 (d,  $J = 21.5$  Hz, 1C), 112.00 (d,  $J = 23.1$  Hz, 1C), 64.1, 61.7, 38.0.

HRMS (ESI)  $m/z$  calculated for  $\text{C}_{19}\text{H}_{16}\text{FNO}_4+\text{Na}^+$ : 364.0956, found: 364.0952.

**(Z)-12-chloro-1-methyl-6-phenyl-4,7-dihydro-2H-benzo[d][1,7]dioxo[3]azacycloundecine-2,9(1H)-dione 3y**

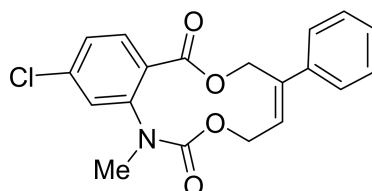

Prepared according to the general procedure to afford **3y** (31.1 mg) in 87% yield as colorless semisolid.

*NMR and HRMS data for the product 3y:*

$^1\text{H}$  NMR (600 MHz,  $\text{CDCl}_3$ )  $\delta$  (ppm): 7.51 (d,  $J = 7.8$  Hz, 1H), 7.46 (d,  $J = 7.8$  Hz, 2H), 7.39



– 7.31 (m, 3H), 7.24 – 7.18 (m, 2H), 6.07 (br s, 1H), 5.23 (br s, 2H), 4.67 (s, 2H), 3.41 (s, 3H).  
<sup>13</sup>C NMR (150 MHz, CDCl<sub>3</sub>) δ (ppm): 167.1, 153.8, 145.6, 142.2, 140.9, 136.9, 128.8, 128.6, 128.2, 126.7, 125.5, 124.9, 124.3, 64.2, 61.7, 38.0.

HRMS (ESI) m/z calculated for C<sub>19</sub>H<sub>16</sub>ClNO<sub>4</sub>+Na<sup>+</sup>: 380.0660(<sup>35</sup>Cl), 382.0631 (<sup>37</sup>Cl), found: 380.0659, 382.0635.

**(Z)-12-bromo-1-methyl-6-phenyl-4,7-dihydro-2H-benzo[d][1,7]dioxo[3]azacycloundecine-2,9(1H)-dione 3z**

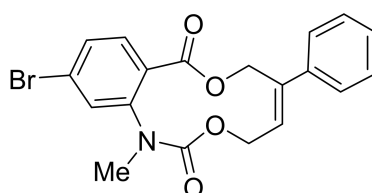

Prepared according to the general procedure to afford **3z** (34.6 mg) in 86% yield as colorless semisolid.

*NMR and HRMS data for the product 3z:*

<sup>1</sup>H NMR (600 MHz, CDCl<sub>3</sub>) δ (ppm): 7.50 – 7.42 (m, 3H), 7.40 – 7.35 (m, 4H), 7.34 – 7.28 (m, 1H), 6.07 (t, *J* = 6.0 Hz, 1H), 5.22 (br s, 2H), 4.66 (s, 2H), 3.41 (s, 3H).

<sup>13</sup>C NMR (150 MHz, CDCl<sub>3</sub>) δ (ppm): 167.2, 153.8, 145.7, 142.1, 140.8, 128.8, 128.7, 128.5, 128.4, 128.2, 127.7, 126.7, 124.9, 124.2, 64.2, 61.7, 38.0.

HRMS (ESI) m/z calculated for C<sub>19</sub>H<sub>16</sub>BrNO<sub>4</sub>+Na<sup>+</sup>: 424.0155 (<sup>79</sup>Br), 426.0134 (<sup>81</sup>Br), found: 424.0155, 426.0138.

**(Z)-12-methoxy-1-methyl-6-phenyl-4,7-dihydro-2H-benzo[d][1,7]dioxo[3]azacycloundecine-2,9(1H)-dione 3aa**

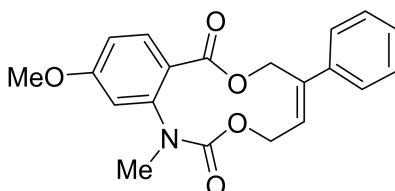

Prepared according to the general procedure to afford **3aa** (28.9 mg) in 82% yield as colorless semisolid.

*NMR and HRMS data for the product 3aa:*

<sup>1</sup>H NMR (600 MHz, CDCl<sub>3</sub>) δ (ppm): 7.63 (d, *J* = 8.4 Hz, 1H), 7.46 (d, *J* = 7.8 Hz, 2H), 7.36

(t,  $J = 7.2$  Hz, 2H), 7.33 – 7.29 (m, 1H), 6.82 – 6.72 (m, 2H), 5.98 (t,  $J = 7.2$  Hz, 1H), 5.21 (br s, 2H), 4.71 (s, 2H), 3.84 (s, 3H), 3.41 (s, 3H).

$^{13}\text{C}$  NMR (150 MHz,  $\text{CDCl}_3$ )  $\delta$  (ppm): 167.5, 162.1, 154.5, 144.8, 143.0, 141.4, 130.1, 128.5, 128.0, 126.8, 124.8, 121.7, 111.2, 110.3, 63.9, 61.7, 55.6, 38.3.

HRMS (ESI)  $m/z$  calculated for  $\text{C}_{20}\text{H}_{19}\text{NO}_5 + \text{Na}^+$ : 376.1155, found: 376.1156.

**(Z)-11-fluoro-1-methyl-6-phenyl-4,7-dihydro-2H-benzo[d][1,7]dioxo[3]azacycloundecine-2,9(1H)-dione 3ab**

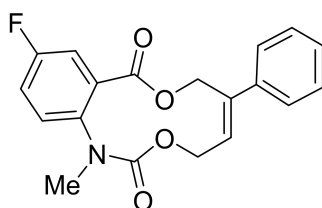

Prepared according to the general procedure to afford **3ab** (30.7 mg, m. p. = 124 – 126 °C) in 90% yield as white solid.

*NMR and HRMS data for the product 3ab:*

$^1\text{H}$  NMR (600 MHz,  $\text{CDCl}_3$ )  $\delta$  (ppm): 7.47 (d,  $J = 7.2$  Hz, 2H), 7.37 (t,  $J = 7.2$  Hz, 2H), 7.35 – 7.31 (m, 1H), 7.28 – 7.24 (m, 1H), 7.23 – 7.19 (m, 1H), 7.17 – 7.12 (m, 1H), 6.10 (t,  $J = 6.6$  Hz, 1H), 5.22 (br s, 2H), 4.66 (s, 2H), 3.39 (s, 3H).

$^{13}\text{C}$  NMR (150 MHz,  $\text{CDCl}_3$ )  $\delta$  (ppm): 166.6, 159.0 (d,  $J = 245.7$  Hz, 1C), 154.0, 145.6, 140.9, 136.9, 131.6 (d,  $J = 4.2$  Hz, 1C), 128.6, 128.3, 126.7, 126.5 (d,  $J = 7.2$  Hz, 1C), 124.5, 118.1 (d,  $J = 24.5$  Hz, 1C), 114.6 (d,  $J = 24.5$  Hz, 1C), 64.4, 61.5, 38.3.

HRMS (ESI)  $m/z$  calculated for  $\text{C}_{19}\text{H}_{16}\text{FNO}_4 + \text{Na}^+$ : 364.0956, found: 364.0954.

**(Z)-11-chloro-1-methyl-6-phenyl-4,7-dihydro-2H-benzo[d][1,7]dioxo[3]azacycloundecine-2,9(1H)-dione 3ac**

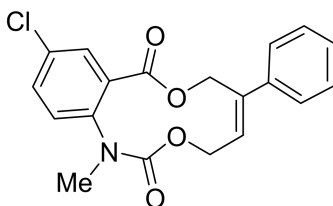

Prepared according to the general procedure to afford **3ac** (29.7 mg, m. p. = 121 – 124 °C) in 83% yield as yellowish solid.

*NMR and HRMS data for the product 3ac:*

**<sup>1</sup>H NMR (600 MHz, CDCl<sub>3</sub>)** δ (ppm): 7.52 (s, 1H), 7.46 (d, *J* = 6.6 Hz, 2H), 7.42 (d, *J* = 8.4 Hz, 1H), 7.39 – 7.35 (m, 2H), 7.35 – 7.31 (m, 1H), 7.17 (d, *J* = 9.0 Hz, 1H), 6.10 (t, *J* = 6.6 Hz, 1H), 5.23 (br s, 2H), 4.65 (s, 2H), 3.39 (s, 3H).

**<sup>13</sup>C NMR (150 MHz, CDCl<sub>3</sub>)** δ (ppm): 166.6, 153.9, 145.8, 140.8, 139.4, 131.3, 131.1, 130.9, 128.6, 128.3, 127.5, 126.7, 125.8, 124.3, 64.3, 61.6, 38.0.

**HRMS (ESI)** *m/z* calculated for C<sub>19</sub>H<sub>16</sub>ClNO<sub>4</sub>+H<sup>+</sup>: 358.0841 (<sup>35</sup>Cl), 360.0811 (<sup>37</sup>Cl), found: 358.0836, 360.0801.

**(Z)-11-bromo-1-methyl-6-phenyl-4,7-dihydro-2H-benzo[d][1,7]dioxo[3]azacycloundecine-2,9(1H)-dione 3ad**

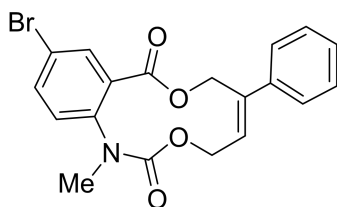

Prepared according to the general procedure to afford **3ad** (36.6 mg, m. p. = 117 – 123 °C) in 91% yield as white solid.

*NMR and HRMS data for the product 3ad:*

**<sup>1</sup>H NMR (600 MHz, CDCl<sub>3</sub>)** δ (ppm): 7.66 (s, 1H), 7.56 (d, *J* = 8.4 Hz, 1H), 7.47 (d, *J* = 7.8 Hz, 2H), 7.37 (t, *J* = 7.8 Hz, 2H), 7.35 – 7.30 (m, 1H), 7.11 (d, *J* = 9.0 Hz, 1H), 6.10 (t, *J* = 6.6 Hz, 1H), 5.24 (br s, 2H), 4.65 (s, 2H), 3.39 (s, 3H).

**<sup>13</sup>C NMR (150 MHz, CDCl<sub>3</sub>)** δ (ppm): 166.5, 153.8, 145.9, 140.8, 139.8, 134.1, 131.6, 130.3, 128.6, 128.4, 128.3, 126.7, 126.1, 124.3, 118.5, 64.3, 61.6, 38.0.

**HRMS (ESI)** *m/z* calculated for C<sub>19</sub>H<sub>16</sub>BrNO<sub>4</sub>+H<sup>+</sup>: 402.0335 (<sup>79</sup>Br), 404.0315 (<sup>81</sup>Br), found: 402.0331, 404.0307.

**(Z)-1,11-dimethyl-6-phenyl-4,7-dihydro-2H-benzo[d][1,7]dioxo[3]azacycloundecine-2,9(1H)-dione 3ae**

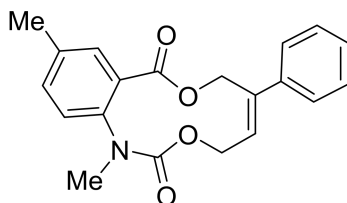

Prepared according to the general procedure to afford **3ae** (24.9 mg, m. p. = 83 – 90 °C) in 74% yield as yellowish solid.

*NMR and HRMS data for the product 3ae:*

**<sup>1</sup>H NMR (600 MHz, CDCl<sub>3</sub>)** δ (ppm): 7.48 (d, *J* = 7.8 Hz, 2H), 7.39 – 7.35 (m, 3H), 7.33 – 7.29 (m, 1H), 7.28 – 7.24 (m, 1H), 7.12 (d, *J* = 8.4 Hz, 1H), 6.08 (t, *J* = 7.2 Hz, 1H), 5.22 (br s, 2H), 4.66 (s, 2H), 3.39 (s, 3H), 2.36 (s, 3H).

**<sup>13</sup>C NMR (150 MHz, CDCl<sub>3</sub>)** δ (ppm): 167.9, 154.3, 145.6, 141.0, 138.2, 135.4, 131.8, 129.7, 128.5, 128.1, 127.9, 126.8, 124.5, 124.5, 64.0, 61.4, 38.1, 20.7.

**HRMS (ESI)** *m/z* calculated for C<sub>20</sub>H<sub>19</sub>NO<sub>4</sub>+Na<sup>+</sup>: 360.1206, found: 360.1194.

**(Z)-11-methoxy-1-methyl-6-phenyl-4,7-dihydro-2H-benzo[d][1,7]dioxo[3]azacycloundecine-2,9(1H)-dione 3af**

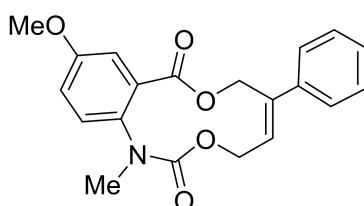

Prepared according to the general procedure to afford **3af** (25.4 mg) in 72% yield as colorless semisolid.

*NMR and HRMS data for the product 3af:*

**<sup>1</sup>H NMR (600 MHz, CDCl<sub>3</sub>)** δ (ppm): 7.48 (d, *J* = 7.2 Hz, 2H), 7.36 (t, *J* = 7.2 Hz, 2H), 7.33 (d, *J* = 6.6 Hz, 1H), 7.16 (d, *J* = 9.0 Hz, 1H), 7.08 (d, *J* = 3.0 Hz, 1H), 6.98 (dd, *J* = 9.0, 3.0 Hz, 1H), 6.08 (t, *J* = 7.2 Hz, 1H), 5.21 (br s, 2H), 4.66 (s, 2H), 3.82 (s, 3H), 3.37 (s, 3H).

**<sup>13</sup>C NMR (150 MHz, CDCl<sub>3</sub>)** δ (ppm): 167.5, 156.8, 154.4, 145.3, 141.1, 133.8, 130.9, 128.5, 128.1, 126.8, 126.1, 124.7, 116.8, 112.5, 64.2, 61.4, 55.6, 38.3.

**HRMS (ESI)** *m/z* calculated for C<sub>20</sub>H<sub>19</sub>NO<sub>5</sub>+Na<sup>+</sup>: 376.1155, found: 376.1149.

**(Z)-10-chloro-1-methyl-6-phenyl-4,7-dihydro-2H-benzo[d][1,7]dioxo[3]azacycloundecine-2,9(1H)-dione 3ag**

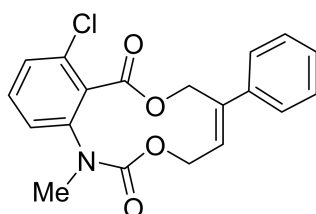

Prepared according to the general procedure to afford **3ag** (32.2 mg, m. p. = 74 – 82 °C) in 90% yield as yellowish solid.

*NMR and HRMS data for the product 3ag:*

**<sup>1</sup>H NMR (600 MHz, CDCl<sub>3</sub>)** δ (ppm): 7.52 (d, *J* = 7.8 Hz, 2H), 7.43 – 7.31 (m, 4H), 7.28 (d, *J* = 8.4 Hz, 1H), 7.15 (d, *J* = 7.2 Hz, 1H), 6.17 (t, *J* = 7.2 Hz, 1H), 5.22 (br s, 2H), 4.65 (s, 2H), 3.33 (s, 3H).

**<sup>13</sup>C NMR (150 MHz, CDCl<sub>3</sub>)** δ (ppm): 165.7, 153.3, 145.4, 142.1, 140.6, 131.6, 131.0, 130.8, 128.5, 128.2, 127.1, 127.0, 124.1, 123.4, 65.4, 61.4, 38.1.

**HRMS (ESI)** *m/z* calculated for C<sub>19</sub>H<sub>16</sub>ClNO<sub>4</sub>+Na<sup>+</sup>: 380.0660(<sup>35</sup>Cl), 382.0631 (<sup>37</sup>Cl), found: 380.0662, 382.0636.

**(Z)-10-methoxy-1-methyl-6-phenyl-4,7-dihydro-2H-benzo[d][1,7]dioxo[3]azacycloundecine-2,9(1H)-dione 3ah**

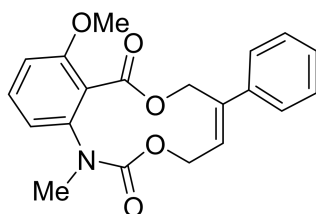

Prepared according to the general procedure to afford **3ah** (31.1 mg) in 88% yield as colorless semisolid.

*NMR and HRMS data for the product 3ah:*

**<sup>1</sup>H NMR (600 MHz, CDCl<sub>3</sub>)** δ (ppm): 7.52 (d, *J* = 7.8 Hz, 2H), 7.39 – 7.33 (m, 3H), 7.32 – 7.28 (m, 1H), 6.83 (dd, *J* = 12.0, 8.4 Hz, 2H), 6.14 (t, *J* = 7.2 Hz, 1H), 5.19 (br s, 2H), 4.66 (s, 2H), 3.87 (s, 3H), 3.32 (s, 3H).

**<sup>13</sup>C NMR (150 MHz, CDCl<sub>3</sub>)** δ (ppm): 166.9, 156.4, 153.6, 145.0, 141.7, 141.0, 130.9, 128.4, 128.1, 127.1, 124.2, 121.6, 117.2, 108.9, 65.5, 61.4, 56.2, 37.9.

**HRMS (ESI)** *m/z* calculated for C<sub>20</sub>H<sub>19</sub>NO<sub>5</sub>+Na<sup>+</sup>: 376.1155, found: 376.1151.

**(Z)-1-ethyl-6-phenyl-4,7-dihydro-2H-benzo[d][1,7]dioxo[3]azacycloundecine-2,9(1H)-dione 3ai**

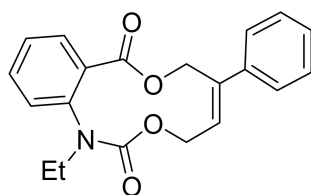

Prepared according to the general procedure to afford **3ai** (28.6 mg, m. p. = 109 – 113 °C) in 85% yield as yellowish solid.

*NMR and HRMS data for the product 3ai:*

**<sup>1</sup>H NMR (600 MHz, CDCl<sub>3</sub>)** δ (ppm): 7.57 (d, *J* = 7.8 Hz, 1H), 7.51 – 7.42 (m, 3H), 7.36 (t, *J* = 7.8 Hz, 2H), 7.32 (t, *J* = 7.2 Hz, 1H), 7.29 – 7.21 (m, 2H), 6.08 (t, *J* = 7.2 Hz, 1H), 5.21 (br s, 2H), 4.66 (s, 2H), 3.89 (br s, 2H), 1.25 (t, *J* = 7.2 Hz, 3H).

**<sup>13</sup>C NMR (150 MHz, CDCl<sub>3</sub>)** δ (ppm): 167.6, 153.7, 145.6, 141.1, 139.5, 131.2, 130.8, 128.5, 128.1, 127.6, 126.7, 125.5, 124.9, 124.6, 64.0, 61.4, 46.0, 13.2.

**HRMS (ESI)** *m/z* calculated for C<sub>20</sub>H<sub>19</sub>NO<sub>4</sub>+Na<sup>+</sup>: 360.1206, found: 360.1204.

**(Z)-1-benzyl-6-phenyl-4,7-dihydro-2H-benzo[d][1,7]dioxo[3]azacycloundecine-2,9(1H)-dione 3aj**

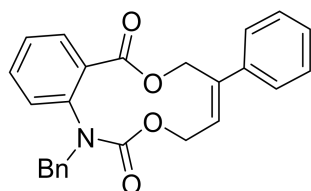

Prepared according to the general procedure to afford **3aj** (27.1 mg, m. p. = 170 – 173 °C) in 68% yield as white solid.

*NMR and HRMS data for the product 3aj:*

**<sup>1</sup>H NMR (600 MHz, CDCl<sub>3</sub>)** δ (ppm): 7.55 (d, *J* = 7.2 Hz, 1H), 7.48 (d, *J* = 7.2 Hz, 2H), 7.43 – 7.28 (m, 7H), 7.25 – 7.23 (m, 2H), 7.20 (t, *J* = 7.2 Hz, 1H), 7.15 (d, *J* = 8.4 Hz, 1H), 6.09 (t, *J* = 7.2 Hz, 1H), 5.40 – 4.91 (m, 4H), 4.73 (s, 2H).

**<sup>13</sup>C NMR (150 MHz, CDCl<sub>3</sub>)** δ (ppm): 167.7, 154.5, 145.8, 141.0, 140.0, 137.5, 131.2, 129.8, 128.5, 128.4, 128.2, 127.8, 127.6, 127.3, 126.7, 125.5, 124.4, 124.2, 63.8, 61.8, 54.4.

**HRMS (ESI)** *m/z* calculated for C<sub>25</sub>H<sub>21</sub>NO<sub>4</sub>+Na<sup>+</sup>: 422.1363, found: 422.1362.

**(Z)-1-allyl-6-phenyl-4,7-dihydro-2H-benzo[d][1,7]dioxo[3]azacycloundecine-2,9(1H)-dione 3ak**

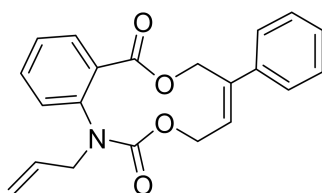

Prepared according to the general procedure to afford **3ak** (25.8 mg, m. p. = 108 – 110 °C) in 74% yield as white solid.

*NMR and HRMS data for the product 3ak:*

**<sup>1</sup>H NMR (600 MHz, CDCl<sub>3</sub>)** δ (ppm): 7.56 (d, *J* = 6.6 Hz, 1H), 7.48 (d, *J* = 7.8 Hz, 2H), 7.43 (t, *J* = 7.8 Hz, 1H), 7.37 (t, *J* = 7.8 Hz, 2H), 7.33 (d, *J* = 7.2 Hz, 1H), 7.32 – 7.28 (m, 1H), 7.23 (t, *J* = 7.8 Hz, 1H), 6.10 – 6.00 (m, 2H), 5.37 – 5.05 (m, 4H), 4.68 (br s, 2H), 4.43 (br s, 2H).

**<sup>13</sup>C NMR (150 MHz, CDCl<sub>3</sub>)** δ (ppm): 167.7, 153.8, 145.8, 141.0, 139.9, 133.9, 131.1, 130.0, 128.5, 128.1, 127.5, 126.7, 125.4, 124.4, 116.9, 63.9, 61.6, 53.7.

**HRMS (ESI)** *m/z* calculated for C<sub>21</sub>H<sub>19</sub>NO<sub>4</sub>+Na<sup>+</sup>: 372.1206, found: 372.1211.

## 5. General Procedure for the Cyclisation of Cyclic Anhydride and VECs

General procedure for the synthesis of 10-, 11- or 12-membered products **5**, **6** or **7**

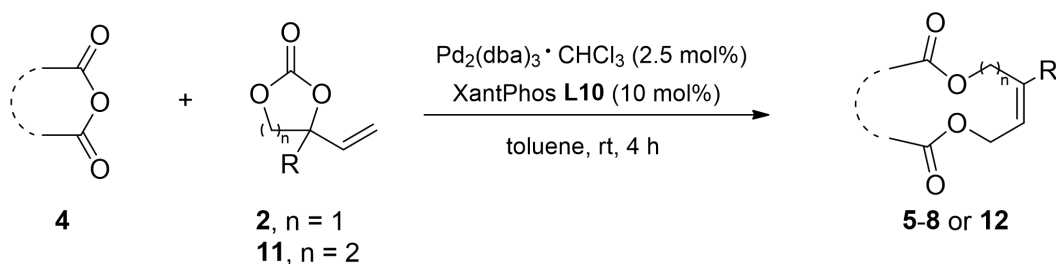

To an oven-dried Schlenk tube was added  $\text{Pd}_2(\text{dba})_3 \cdot \text{CHCl}_3$  (2.5 mol%) and XantPhos (10 mol%), after which the tube was evacuated and back-filled with argon three times. Then under the protection of argon, dry toluene (1.0 mL) was added and stirred at room temperature for 30 min. Subsequently, under the protection of argon, cyclic anhydrides **4** or **8** (0.10 mmol) and vinyl ethylene carbonates **2** or **12** (0.15 mmol) were added and the reaction mixture was stirred at room temperature for 4 hours. Then the mixture was directly purified by column chromatography on silica gel (petroleum ether/ dichloromethane = 3/1, then petroleum ether/ethyl acetate = 30/1 to 10/1) to afford the corresponding products in 52–88% yields, which were dried under vacuum and further analyzed by  $^1\text{H}$  NMR,  $^{13}\text{C}$  NMR, HRMS, *etc.*

Gram-scale synthesis of the 10-membered lactone **5q**

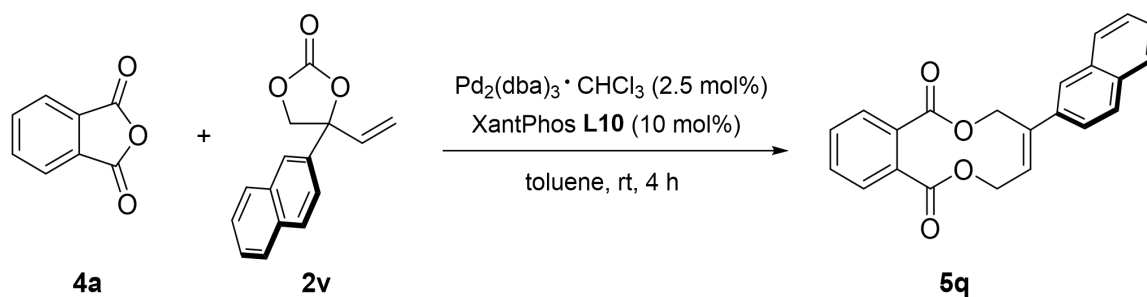

To an oven-dried 100 mL Schlenk flask, was added  $\text{Pd}_2(\text{dba})_3 \cdot \text{CHCl}_3$  (0.225 mmol, 0.233 g) and XantPhos (0.90 mmol, 0.521 g), after which the tube was evacuated and back-filled with argon three times. Then under the protection of argon, dry toluene (10 mL) was added and stirred at room temperature for 30 min. Subsequently, under the protection of argon, phthalic anhydride **1a** (6.00 mmol, 0.89 g) and vinyl ethylene carbonate **2v** (9.00 mmol, 2.16 g) were added and the reaction mixture was stirred at room temperature for 4 hours. Then the mixture was concentrated and purified by column chromatography on silica gel (petroleum ether/



dichloromethane = 3/1, then petroleum ether/ethyl acetate = 30:1) to afford **5q** (0.51 g) as white solid in 57% yields.

**(Z)-4-phenyl-3,6-dihydrobenzo[c][1,6]dioxecine-1,8-dione 5a**

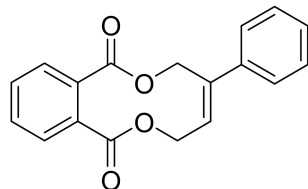

Prepared according to the general procedure to afford **5a** (23.5 mg, m. p. = 82 – 90 °C) in 80% yield as white solid.

*NMR and HRMS data for the product 5a:*

**<sup>1</sup>H NMR (600 MHz, CDCl<sub>3</sub>)** δ (ppm): 7.83 – 7.78 (m, 2H), 7.62 – 7.58 (m, 2H), 7.51 – 7.48 (m, 2H), 7.39 – 7.35 (m, 2H), 7.34 – 7.30 (m, 1H), 6.27 (t, *J* = 6.6 Hz, 1H), 5.19 (s, 2H), 4.95 (d, *J* = 6.0 Hz, 2H).

**<sup>13</sup>C NMR (150 MHz, CDCl<sub>3</sub>)** δ (ppm): 168.4, 168.0, 143.8, 140.8, 132.7, 132.6, 131.6, 129.1, 129.1, 128.6, 128.2, 126.7, 126.5, 124.8, 66.2, 62.1.

**HRMS (ESI)** *m/z* calculated for C<sub>18</sub>H<sub>14</sub>O<sub>4</sub>+Na<sup>+</sup>: 317.0784, found: 317.0783.

**(Z)-4-(4-fluorophenyl)-3,6-dihydrobenzo[c][1,6]dioxecine-1,8-dione 5b**

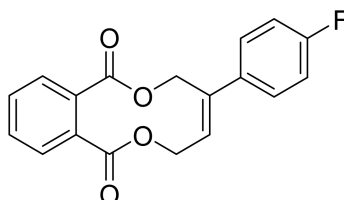

Prepared according to the general procedure to afford **5b** (25.6 mg, m. p. = 150 – 152 °C) in 82% yield as white solid.

*NMR and HRMS data for the product 5b:*

**<sup>1</sup>H NMR (600 MHz, CDCl<sub>3</sub>)** δ (ppm): 7.83 – 7.78 (m, 2H), 7.63 – 7.58 (m, 2H), 7.50 – 7.46 (m, 2H), 7.05 (t, *J* = 9.0 Hz, 2H), 6.22 (t, *J* = 6.6 Hz, 1H), 5.14 (s, 2H), 4.93 (d, *J* = 6.0 Hz, 2H).

**<sup>13</sup>C NMR (150 MHz, CDCl<sub>3</sub>)** δ (ppm): 168.3, 168.1, 162.7 (d, *J* = 247.1 Hz, 1C), 143.1, 136.9 (d, *J* = 4.4 Hz, 1C), 132.8, 132.5, 131.7 (d, *J* = 11.6 Hz, 1C), 129.1, 129.1, 128.6, 128.5, 126.3, 115.5 (d, *J* = 21.6 Hz, 1C), 66.2, 62.1.

**HRMS (ESI)** m/z calculated for C<sub>18</sub>H<sub>13</sub>FO<sub>4</sub>+Na<sup>+</sup>: 335.0690, found: 335.0682.

**(Z)-4-(4-chlorophenyl)-3,6-dihydrobenzo[c][1,6]dioxecine-1,8-dione 5c**

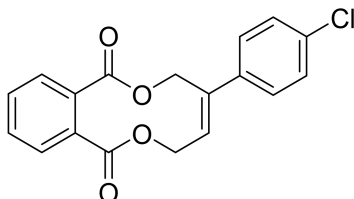

Prepared according to the general procedure to afford **5c** (26.3 mg, m. p. = 132 – 138 °C) in 80% yield as white solid.

*NMR and HRMS data for the product 5c:*

**<sup>1</sup>H NMR (600 MHz, CDCl<sub>3</sub>)** δ (ppm): 7.83 – 7.78 (m, 2H), 7.63 – 7.59 (m, 2H), 7.44 (d, *J* = 9.0 Hz, 2H), 7.33 (d, *J* = 7.8 Hz, 2H), 6.26 (t, *J* = 6.0 Hz, 1H), 5.14 (s, 2H), 4.94 (d, *J* = 6.0 Hz, 2H).

**<sup>13</sup>C NMR (150 MHz, CDCl<sub>3</sub>)** δ (ppm): 168.3, 168.0, 143.0, 139.3, 132.7, 132.5, 131.8, 131.7, 129.1, 128.8, 128.1, 127.0, 125.7, 66.0, 62.0.

**HRMS (ESI)** m/z calculated for C<sub>18</sub>H<sub>13</sub>ClO<sub>4</sub>+Na<sup>+</sup>: 351.0395(<sup>35</sup>Cl), 353.0365 (<sup>37</sup>Cl), found: 351.0401, 353.0367.

**(Z)-4-(4-bromophenyl)-3,6-dihydrobenzo[c][1,6]dioxecine-1,8-dione 5d**

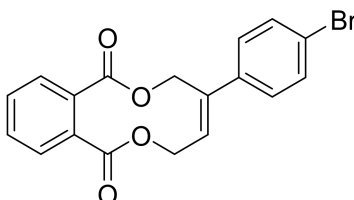

Prepared according to the general procedure to afford **5d** (26.9 mg, m. p. = 139 – 141 °C) in 72% yield as white solid.

*NMR and HRMS data for the product 5d:*

**<sup>1</sup>H NMR (600 MHz, CDCl<sub>3</sub>)** δ (ppm): 7.83 – 7.78 (m, 2H), 7.64 – 7.58 (m, 2H), 7.48 (d, *J* = 9.0 Hz, 2H), 7.37 (d, *J* = 7.8 Hz, 2H), 6.26 (t, *J* = 6.6 Hz, 1H), 5.13 (s, 2H), 4.93 (d, *J* = 6.0 Hz, 2H).

**<sup>13</sup>C NMR (150 MHz, CDCl<sub>3</sub>)** δ (ppm): 168.3, 168.0, 143.0, 139.7, 132.7, 132.4, 131.7, 131.7, 131.7, 129.1, 128.4, 127.0, 122.4, 65.9, 62.0.

**HRMS (ESI)** m/z calculated for C<sub>18</sub>H<sub>13</sub>BrO<sub>4</sub>+Na<sup>+</sup>: 394.9889 (<sup>79</sup>Br), 396.9869 (<sup>81</sup>Br), found:

394.9892, 396.9875.

**(Z)-4-(p-tolyl)-3,6-dihydrobenzo[c][1,6]dioxecine-1,8-dione 5e**

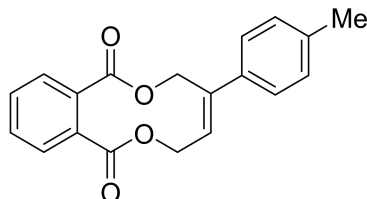

Prepared according to the general procedure to afford **5e** (25.6 mg, m. p. = 101 – 105 °C) in 83% yield as white solid.

*NMR and HRMS data for the product 5e:*

**<sup>1</sup>H NMR (600 MHz, CDCl<sub>3</sub>)** δ (ppm): 7.83 – 7.78 (m, 2H), 7.62 – 7.58 (m, 2H), 7.39 (d, *J* = 7.8 Hz, 2H), 7.17 (d, *J* = 7.8 Hz, 2H), 6.24 (t, *J* = 6.0 Hz, 1H), 5.17 (s, 2H), 4.94 (d, *J* = 6.6 Hz, 2H), 2.35 (s, 3H).

**<sup>13</sup>C NMR (150 MHz, CDCl<sub>3</sub>)** δ (ppm): 168.4, 168.1, 143.8, 138.2, 137.9, 132.8, 132.7, 131.6, 129.3, 129.1, 126.6, 125.8, 125.6, 124.9, 66.3, 62.2, 21.1.

**HRMS (ESI)** *m/z* calculated for C<sub>19</sub>H<sub>16</sub>O<sub>4</sub>+Na<sup>+</sup>: 331.0941, found: 331.0935.

**(Z)-4-(4-ethylphenyl)-3,6-dihydrobenzo[c][1,6]dioxecine-1,8-dione 5f**

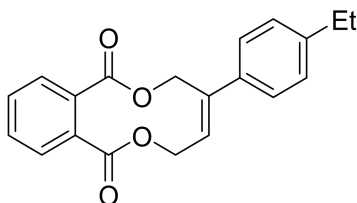

Prepared according to the general procedure to afford **5f** (26.1 mg, m. p. = 63 – 66 °C) in 81% yield as white solid.

*NMR and HRMS data for the product 5f:*

**<sup>1</sup>H NMR (600 MHz, CDCl<sub>3</sub>)** δ (ppm): 7.83 – 7.76 (m, 2H), 7.62 – 7.57 (m, 2H), 7.43 (d, *J* = 7.8 Hz, 2H), 7.20 (d, *J* = 8.4 Hz, 2H), 6.23 (t, *J* = 6.6 Hz, 1H), 5.18 (s, 2H), 4.94 (d, *J* = 6.0 Hz, 2H), 2.65 (q, *J* = 7.8 Hz, 2H), 1.24 (t, *J* = 7.8 Hz, 3H).

**<sup>13</sup>C NMR (150 MHz, CDCl<sub>3</sub>)** δ (ppm): 168.4, 168.0, 144.5, 143.8, 138.1, 132.8, 132.6, 131.6, 129.1, 128.1, 126.7, 125.6, 66.3, 62.2, 28.5, 15.5.

**HRMS (ESI)** *m/z* calculated for C<sub>20</sub>H<sub>18</sub>O<sub>4</sub>+Na<sup>+</sup>: 345.1097, found: 345.1095.

**(Z)-4-(4-*iso*-propylphenyl)-3,6-dihydrobenzo[*c*][1,6]dioxecine-1,8-dione 5g**

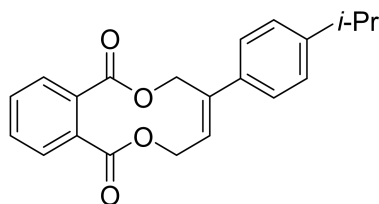

Prepared according to the general procedure to afford **5g** (25.5 mg, m. p. = 54 – 58 °C) in 76% yield as white solid.

*NMR and HRMS data for the product 5g:*

**<sup>1</sup>H NMR (600 MHz, CDCl<sub>3</sub>)** δ (ppm): 7.83 – 7.78 (m, 2H), 7.63 – 7.58 (m, 2H), 7.43 (d, *J* = 8.4 Hz, 2H), 7.20 (d, *J* = 7.8 Hz, 2H), 6.25 (t, *J* = 6.6 Hz, 1H), 5.18 (s, 2H), 4.94 (d, *J* = 6.0 Hz, 2H), 2.95 – 2.87 (m, 1H), 1.25 (d, *J* = 6.6 Hz, 6H).

**<sup>13</sup>C NMR (150 MHz, CDCl<sub>3</sub>)** δ (ppm): 168.4, 168.0, 149.1, 143.8, 138.2, 136.0, 132.8, 132.7, 131.6, 129.1, 126.7, 126.7, 125.7, 66.3, 62.2, 33.8, 23.9.

**HRMS (ESI)** *m/z* calculated for C<sub>21</sub>H<sub>20</sub>O<sub>4</sub>+Na<sup>+</sup>: 359.1254, found: 359.1259.

**(Z)-4-(3-fluorophenyl)-3,6-dihydrobenzo[*c*][1,6]dioxecine-1,8-dione 5h**

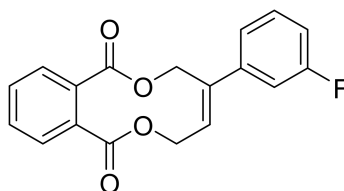

Prepared according to the general procedure to afford **5h** (23.1 mg, m. p. = 81 – 85 °C) in 74% yield as white solid.

*NMR and HRMS data for the product 5h:*

**<sup>1</sup>H NMR (600 MHz, CDCl<sub>3</sub>)** δ (ppm): 7.83 – 7.78 (m, 2H), 7.63 – 7.59 (m, 2H), 7.36 – 7.30 (m, 2H), 7.22 (dt, *J* = 10.2, 2.4 Hz, 1H), 7.02 (td, *J* = 8.4, 3.0 Hz, 1H), 6.30 (t, *J* = 6.0 Hz, 1H), 5.15 (s, 2H), 4.94 (d, *J* = 7.2 Hz, 2H).

**<sup>13</sup>C NMR (150 MHz, CDCl<sub>3</sub>)** δ (ppm): 168.4, 167.9, 162.8 (d, *J* = 244.1 Hz, 1C), 143.0 (d, *J* = 7.2 Hz, 1C), 142.7, 132.7, 132.5, 131.7 (d, *J* = 2.9 Hz, 1C), 130.1 (d, *J* = 7.2 Hz, 1C), 129.2, 129.1, 127.6, 125.7, 122.4 (d, *J* = 5.7 Hz, 1C), 115.1 (d, *J* = 21.6 Hz, 1C), 113.8 (d, *J* = 21.5 Hz, 1C), 66.0, 61.9.

**HRMS (ESI)** *m/z* calculated for C<sub>18</sub>H<sub>13</sub>FO<sub>4</sub>+Na<sup>+</sup>: 335.0690, found: 335.0699.

**(Z)-4-(3-chlorophenyl)-3,6-dihydrobenzo[c][1,6]dioxecine-1,8-dione 5i**

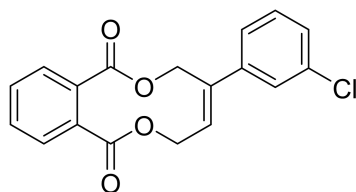

Prepared according to the general procedure to afford **5i** (25.0 mg, m. p. = 91 – 93 °C) in 76% yield as white solid.

*NMR and HRMS data for the product 5i:*

**<sup>1</sup>H NMR (600 MHz, CDCl<sub>3</sub>)** δ (ppm): 7.83 – 7.78 (m, 2H), 7.63 – 7.58 (m, 2H), 7.48 (s, 1H), 7.40 – 7.36 (m, 1H), 7.31 – 7.28 (m, 2H), 6.29 (t, *J* = 6.0 Hz, 1H), 5.14 (s, 2H), 4.94 (d, *J* = 6.6 Hz, 2H).

**<sup>13</sup>C NMR (150 MHz, CDCl<sub>3</sub>)** δ (ppm): 168.4, 167.9, 142.6, 134.5, 132.6, 132.4, 131.7, 131.7, 129.8, 129.2, 129.1, 128.3, 127.7, 126.9, 124.9, 65.9, 61.9.

**HRMS (ESI)** *m/z* calculated for C<sub>18</sub>H<sub>13</sub>ClO<sub>4</sub>+Na<sup>+</sup>: 351.0395(<sup>35</sup>Cl), 353.0365 (<sup>37</sup>Cl), found: 351.0392, 353.0356.

**(Z)-4-(3-bromophenyl)-3,6-dihydrobenzo[c][1,6]dioxecine-1,8-dione 5j**

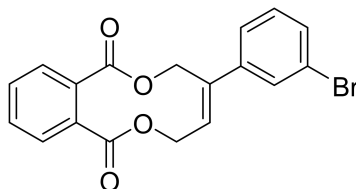

Prepared according to the general procedure to afford **5j** (26.5 mg, m. p. = 91 – 94 °C) in 71% yield as white solid.

*NMR and HRMS data for the product 5j:*

**<sup>1</sup>H NMR (600 MHz, CDCl<sub>3</sub>)** δ (ppm): 7.83 – 7.78 (m, 2H), 7.65 – 7.58 (m, 3H), 7.45 (t, *J* = 9.6 Hz, 2H), 7.24 (t, *J* = 8.4 Hz, 1H), 6.29 (t, *J* = 6.0 Hz, 1H), 5.13 (s, 2H), 4.94 (d, *J* = 6.6 Hz, 2H).

**<sup>13</sup>C NMR (150 MHz, CDCl<sub>3</sub>)** δ (ppm): 168.4, 167.9, 142.9, 142.5, 132.6, 132.4, 131.7, 131.2, 130.1, 129.8, 129.2, 129.1, 127.8, 125.4, 122.7, 65.9, 61.9.

**HRMS (ESI)** *m/z* calculated for C<sub>18</sub>H<sub>13</sub>BrO<sub>4</sub>+H<sup>+</sup>: 373.0070 (<sup>79</sup>Br), 375.0050 (<sup>81</sup>Br), found: 373.0083, 375.0042.

**(Z)-4-(*m*-tolyl)-3,6-dihydrobenzo[*c*][1,6]dioxecine-1,8-dione 5k**

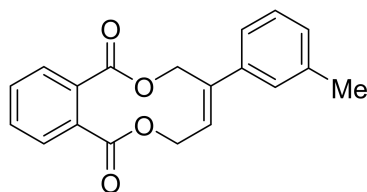

Prepared according to the general procedure to afford **5k** (22.2 mg, m. p. = 75 – 78 °C) in 72% yield as white solid.

*NMR and HRMS data for the product 5k:*

**<sup>1</sup>H NMR (600 MHz, CDCl<sub>3</sub>)** δ (ppm): 7.83 – 7.78 (m, 2H), 7.63 – 7.57 (m, 2H), 7.32 – 7.23 (m, 3H), 7.14 (d, *J* = 7.8 Hz, 1H), 6.26 (t, *J* = 6.0 Hz, 1H), 5.18 (s, 2H), 4.94 (d, *J* = 5.4 Hz, 2H), 2.37 (s, 3H).

**<sup>13</sup>C NMR (150 MHz, CDCl<sub>3</sub>)** δ (ppm): 168.5, 168.0, 143.8, 140.8, 138.2, 132.8, 132.7, 131.6, 129.2, 129.1, 129.0, 128.5, 127.4, 126.3, 123.8, 66.3, 62.1, 21.4.

**HRMS (ESI)** *m/z* calculated for C<sub>19</sub>H<sub>16</sub>O<sub>4</sub>+Na<sup>+</sup>: 331.0941, found: 331.0941.

**(Z)-4-(2-fluorophenyl)-3,6-dihydrobenzo[*c*][1,6]dioxecine-1,8-dione 5l**

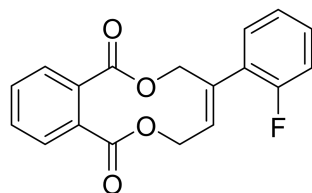

Prepared according to the general procedure to afford **5l** (22.2 mg) in 71% yield as colorless semisolid.

*NMR and HRMS data for the product 5l:*

**<sup>1</sup>H NMR (600 MHz, CDCl<sub>3</sub>)** δ (ppm): 7.82 – 7.76 (m, 2H), 7.62 – 7.58 (m, 2H), 7.39 (td, *J* = 7.8, 1.2 Hz, 1H), 7.31 – 7.27 (m, 1H), 7.14 (t, *J* = 7.8 Hz, 1H), 7.09 – 7.04 (m, 1H), 6.25 (t, *J* = 6.0 Hz, 1H), 5.12 (s, 2H), 4.96 (d, *J* = 6.0 Hz, 2H).

**<sup>13</sup>C NMR (150 MHz, CDCl<sub>3</sub>)** δ (ppm): 168.3, 167.9, 159.6 (d, *J* = 244.2 Hz, 1C), 138.7, 132.6 (d, *J* = 4.4 Hz, 1C), 131.7 (d, *J* = 5.7 Hz, 1C), 130.1 (d, *J* = 4.4 Hz, 1C), 129.8, 129.8, 129.1, 129.1, 129.0, 124.4 (d, *J* = 2.9 Hz, 1C), 115.7 (d, *J* = 21.5 Hz, 1C), 65.8 (d, *J* = 5.9 Hz, 1C), 61.9.

**HRMS (ESI)** *m/z* calculated for C<sub>18</sub>H<sub>13</sub>FO<sub>4</sub>+Na<sup>+</sup>: 335.0690, found: 335.0700.

**(Z)-4-(*o*-tolyl)-3,6-dihydrobenzo[*c*][1,6]dioxecine-1,8-dione 5m**

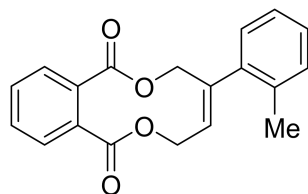

Prepared according to the general procedure to afford **5m** (16.0 mg) in 52% yield as colorless semisolid.

*NMR and HRMS data for the product 5m:*

**<sup>1</sup>H NMR (600 MHz, CDCl<sub>3</sub>)** δ (ppm): 7.84 – 7.78 (m, 2H), 7.63 – 7.58 (m, 2H), 7.24 – 7.16 (m, 4H), 5.96 (t, *J* = 6.0 Hz, 1H), 5.02 (s, 2H), 4.98 (d, *J* = 6.0 Hz, 2H), 2.31 (s, 3H).

**<sup>13</sup>C NMR (150 MHz, CDCl<sub>3</sub>)** δ (ppm): 168.4, 167.9, 143.1, 141.5, 135.0, 132.7, 132.7, 131.7, 131.7, 130.3, 129.2, 129.1, 128.8, 128.1, 127.8, 125.9, 66.2, 61.9, 20.0.

**HRMS (ESI)** *m/z* calculated for C<sub>19</sub>H<sub>16</sub>O<sub>4</sub>+Na<sup>+</sup>: 331.0941, found: 331.0945.

**(Z)-4-(2,4-dichlorophenyl)-3,6-dihydrobenzo[*c*][1,6]dioxecine-1,8-dione 5n**

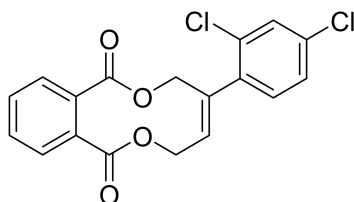

Prepared according to the general procedure to afford **5n** (27.2 mg, m. p. = 58 – 65 °C) in 75% yield as white solid.

*NMR and HRMS data for the product 5n:*

**<sup>1</sup>H NMR (600 MHz, CDCl<sub>3</sub>)** δ (ppm): 7.82 – 7.75 (m, 2H), 7.63 – 7.58 (m, 2H), 7.40 (d, *J* = 1.8 Hz, 1H), 7.31 (d, *J* = 8.4 Hz, 1H), 7.26 – 7.23 (m, 1H), 6.09 (t, *J* = 6.6 Hz, 1H), 5.06 (s, 2H), 4.95 (d, *J* = 6.6 Hz, 2H).

**<sup>13</sup>C NMR (150 MHz, CDCl<sub>3</sub>)** δ (ppm): 168.0, 168.0, 141.4, 139.3, 134.5, 132.7, 132.7, 132.5, 131.7, 131.7, 131.6, 130.2, 129.2, 129.1, 129.0, 127.4, 65.4, 61.8.

**HRMS (ESI)** *m/z* calculated for C<sub>18</sub>H<sub>12</sub>Cl<sub>2</sub>O<sub>4</sub>+Na<sup>+</sup>: 385.0005(<sup>35</sup>Cl), 386.9975 (<sup>37</sup>Cl), found: 385.0000, 386.9964.

**(Z)-4-(2,5-dichlorophenyl)-3,6-dihydrobenzo[*c*][1,6]dioxecine-1,8-dione 5o**

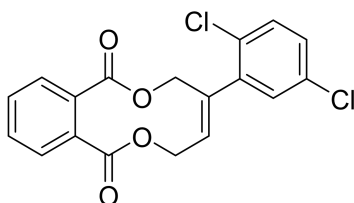

Prepared according to the general procedure to afford **5o** (30.5 mg, m. p. = 106 – 108 °C) in 84% yield as yellowish solid.

*NMR and HRMS data for the product 5o:*

**<sup>1</sup>H NMR (600 MHz, CDCl<sub>3</sub>)** δ (ppm): 7.82 – 7.76 (m, 2H), 7.63 – 7.57 (m, 2H), 7.37 (d, *J* = 8.4 Hz, 1H), 7.31 (d, *J* = 9.0 Hz, 1H), 7.25 – 7.22 (m, 1H), 6.12 (t, *J* = 6.0 Hz, 1H), 5.07 (s, 2H), 4.95 (d, *J* = 6.0 Hz, 2H).

**<sup>13</sup>C NMR (150 MHz, CDCl<sub>3</sub>)** δ (ppm): 168.0, 167.9, 143.3, 142.1, 141.1, 132.9, 132.6, 132.4, 131.7, 130.6, 130.5, 130.3, 129.3, 129.1, 128.4, 125.4, 65.3, 61.7.

**HRMS (ESI)** m/z calculated for C<sub>18</sub>H<sub>12</sub>Cl<sub>2</sub>O<sub>4</sub>+Na<sup>+</sup>: 385.0005(<sup>35</sup>Cl), 386.9975 (<sup>37</sup>Cl), found: 385.0011, 386.9982.

**(Z)-4-((1,1'-biphenyl)-4-yl)-3,6-dihydrobenzo[c][1,6]dioxecine-1,8-dione 5p**

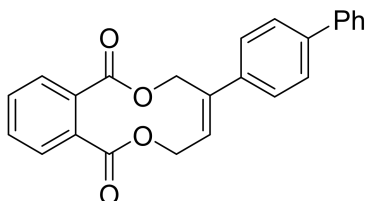

Prepared according to the general procedure to afford **5p** (28.5 mg, m. p. = 143 – 147 °C) in 77% yield as white solid.

*NMR and HRMS data for the product 5p:*

**<sup>1</sup>H NMR (600 MHz, CDCl<sub>3</sub>)** δ (ppm): 7.84 – 7.79 (m, 2H), 7.64 – 7.57 (m, 8H), 7.45 (t, *J* = 7.8 Hz, 2H), 7.36 (t, *J* = 7.8 Hz, 1H), 6.35 (t, *J* = 6.0 Hz, 1H), 5.22 (s, 2H), 4.98 (d, *J* = 6.0 Hz, 2H).

**<sup>13</sup>C NMR (150 MHz, CDCl<sub>3</sub>)** δ (ppm): 168.5, 168.0, 143.4, 141.1, 140.4, 139.6, 132.8, 132.6, 131.7, 131.7, 129.1, 129.1, 128.8, 127.5, 127.3, 127.1, 127.0, 126.4, 66.1, 62.2.

**HRMS (ESI)** m/z calculated for C<sub>24</sub>H<sub>18</sub>O<sub>4</sub>+Na<sup>+</sup>: 393.1097, found: 393.1103 .

**(Z)-4-(naphthalen-2-yl)-3,6-dihydrobenzo[c][1,6]dioxecine-1,8-dione 5q**



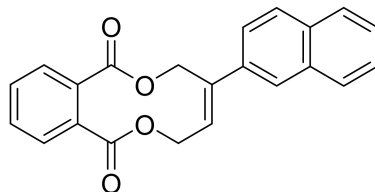

Prepared according to the general procedure to afford **5q** (25.1 mg, m. p. = 80 – 85 °C) in 73% yield as yellowish solid.

*NMR and HRMS data for the product 5q:*

**<sup>1</sup>H NMR (600 MHz, CDCl<sub>3</sub>)** δ (ppm): 8.04 – 8.01 (m, 1H), 7.94 (s, 1H), 7.92 – 7.88 (m, 1H), 7.86 – 7.80 (m, 4H), 7.64 – 7.59 (m, 2H), 7.50 – 7.46 (m, 2H), 6.42 (t, *J* = 6.6 Hz, 1H), 5.29 (s, 2H), 5.01 (d, *J* = 6.6 Hz, 2H).

**<sup>13</sup>C NMR (150 MHz, CDCl<sub>3</sub>)** δ (ppm): 168.6, 168.0, 143.7, 138.1, 136.0, 133.0, 132.8, 132.6, 131.7, 129.2, 129.1, 128.3, 128.2, 127.6, 127.0, 126.4, 126.3, 125.8, 125.7, 124.6, 66.3, 62.2.

**HRMS (ESI)** *m/z* calculated for C<sub>22</sub>H<sub>16</sub>O<sub>4</sub>+H<sup>+</sup>: 345.1121, found: 345.1120.

**(E)-4-(furan-2-yl)-3,6-dihydrobenzo[c][1,6]dioxecine-1,8-dione 5r**

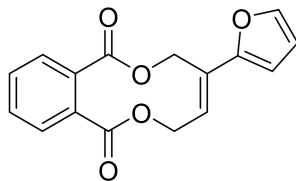

Prepared according to the general procedure to afford **5r** (19.9 mg, m. p. = 145 – 150 °C) in 70% yield as white solid.

*NMR and HRMS data for the product 5r:*

**<sup>1</sup>H NMR (600 MHz, CDCl<sub>3</sub>)** δ (ppm): 7.81 – 7.76 (m, 2H), 7.61 – 7.57 (m, 2H), 7.40 (s, 1H), 6.63 (t, *J* = 6.0 Hz, 1H), 6.52 (d, *J* = 3.6 Hz, 1H), 6.42 (dd, *J* = 3.6, 1.2 Hz, 1H), 5.13 (s, 2H), 4.99 (d, *J* = 6.6 Hz, 2H).

**<sup>13</sup>C NMR (150 MHz, CDCl<sub>3</sub>)** δ (ppm): 168.6, 167.6, 152.5, 143.1, 132.7, 132.4, 131.7, 131.6, 131.3, 129.3, 128.9, 122.6, 111.7, 107.7, 63.2, 61.9.

**HRMS (ESI)** *m/z* calculated for C<sub>16</sub>H<sub>12</sub>O<sub>5</sub>+H<sup>+</sup>: 285.0757, found: 285.0757.

**(E)-4-(thiophen-2-yl)-3,6-dihydrobenzo[c][1,6]dioxecine-1,8-dione 5s**

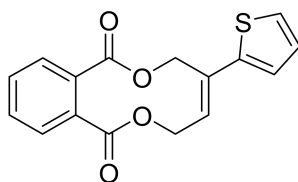

Prepared according to the general procedure to afford **5s** (18.9 mg, m. p. = 136 – 138 °C) in 63% yield as white solid.

*NMR and HRMS data for the product 5s:*

**<sup>1</sup>H NMR (600 MHz, CDCl<sub>3</sub>)** δ (ppm): 7.82 – 7.78 (m, 2H), 7.62 – 7.58 (m, 2H), 7.24 (d, *J* = 4.8 Hz, 2H), 7.03 – 7.00 (m, 1H), 6.45 (t, *J* = 6.6 Hz, 1H), 5.22 (s, 2H), 4.93 (d, *J* = 6.6 Hz, 2H).

**<sup>13</sup>C NMR (150 MHz, CDCl<sub>3</sub>)** δ (ppm): 168.4, 167.9, 143.5, 136.7, 132.7, 132.4, 131.7, 131.7, 129.2, 129.1, 127.8, 125.7, 124.9, 124.3, 65.4, 62.1.

**HRMS (ESI)** *m/z* calculated for C<sub>16</sub>H<sub>12</sub>O<sub>4</sub>S+Na<sup>+</sup>: 323.0349(<sup>34</sup>S), 324.0382 (<sup>32</sup>S), found: 323.0354, 324.0377.

**(Z)-4-phenyl-3,6-dihydro-1H,8H-naphtho[1,8-hi][1,6]dioxacycloundecine-1,8-dione 6a**

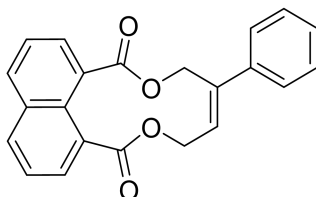

Prepared according to the general procedure to afford **6a** (29.6 mg, m. p. = 174 – 177 °C) in 86% yield as white solid.

*NMR and HRMS data for the product 6a:*

**<sup>1</sup>H NMR (600 MHz, CDCl<sub>3</sub>)** δ (ppm): 8.02 – 7.99 (m, 2H), 7.93 – 7.89 (m, 2H), 7.58 – 7.52 (m, 2H), 7.46 – 7.42 (m, 2H), 7.37 – 7.33 (m, 2H), 7.32 – 7.29 (m, 1H), 6.46 (t, *J* = 7.2 Hz, 1H), 5.39 (s, 2H), 5.11 (d, *J* = 7.2 Hz, 2H).

**<sup>13</sup>C NMR (150 MHz, CDCl<sub>3</sub>)** δ (ppm): 169.6, 169.4, 145.8, 140.6, 134.1, 132.3, 132.3, 129.5, 129.4, 129.4, 129.1, 128.6, 128.3, 127.7, 126.7, 126.1, 125.3, 125.3, 62.5, 59.5.

**HRMS (ESI)** *m/z* calculated for C<sub>22</sub>H<sub>16</sub>O<sub>4</sub>+Na<sup>+</sup>: 367.0941, found: 367.0940.

**(Z)-4-(4-chlorophenyl)-3,6-dihydro-1H,8H-naphtho[1,8-hi][1,6]dioxacycloundecine-1,8-di**

**one 6b**

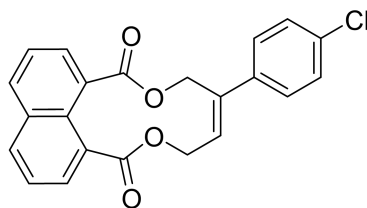

Prepared according to the general procedure to afford **6b** (32.2 mg, m. p. = 142 – 147 °C) in 85% yield as white solid.

*NMR and HRMS data for the product 6b:*

**<sup>1</sup>H NMR (600 MHz, CDCl<sub>3</sub>)** δ (ppm): 8.02 – 7.99 (m, 2H), 7.93 – 7.89 (m, 2H), 7.58 – 7.54 (m, 2H), 7.37 (d, *J* = 9.0 Hz, 2H), 7.32 (d, *J* = 8.4 Hz, 2H), 6.44 (t, *J* = 7.8 Hz, 1H), 5.33 (s, 2H), 5.09 (d, *J* = 7.8 Hz, 2H).

**<sup>13</sup>C NMR (150 MHz, CDCl<sub>3</sub>)** δ (ppm): 169.5, 169.3, 144.6, 139.0, 134.3, 134.0, 132.4, 129.4, 129.3, 129.2, 128.8, 128.2, 127.5, 126.7, 125.3, 125.3, 62.3, 59.3.

**HRMS (ESI)** *m/z* calculated for C<sub>22</sub>H<sub>15</sub>ClO<sub>4</sub>+Na<sup>+</sup>: 401.0551(<sup>35</sup>Cl), 403.0522 (<sup>37</sup>Cl), found: 401.0549, 403.0523.

**(Z)-4-(p-tolyl)-3,6-dihydro-1H,8H-naphtho[1,8-hi][1,6]dioxacycloundecine-1,8-dione 6c**

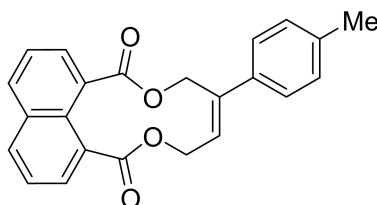

Prepared according to the general procedure to afford **6c** (31.5 mg, m. p. = 123 – 130 °C) in 88% yield as white solid.

*NMR and HRMS data for the product 6c:*

**<sup>1</sup>H NMR (600 MHz, CDCl<sub>3</sub>)** δ (ppm): 7.99 – 7.97 (m, 2H), 7.94 – 7.88 (m, 2H), 7.58 – 7.50 (m, 2H), 7.35 (d, *J* = 7.8 Hz, 2H), 7.18 – 7.15 (m, 2H), 6.43 (t, *J* = 7.2 Hz, 1H), 5.38 (s, 2H), 5.10 (d, *J* = 8.4 Hz, 2H), 2.34 (s, 3H).

**<sup>13</sup>C NMR (150 MHz, CDCl<sub>3</sub>)** δ (ppm): 169.6, 169.3, 145.6, 138.2, 137.6, 134.0, 132.2, 132.2, 129.4, 129.4, 129.2, 129.2, 129.0, 126.6, 126.0, 125.2, 125.2, 62.4, 59.6, 21.1.

**HRMS (ESI)** *m/z* calculated for C<sub>23</sub>H<sub>18</sub>O<sub>4</sub>+Na<sup>+</sup>: 381.1097, found: 381.1103.

**(Z)-8-phenyl-7,10-dihydrodibenzo[h,i][1,6]dioxacyclododecine-5,12-dione 7a**

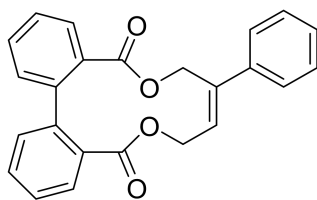

Prepared according to the general procedure to afford **7a** (31.1 mg, m. p. = 146 – 153 °C) in 84% yield as white solid.

*NMR and HRMS data for the product 7a:*

**<sup>1</sup>H NMR (600 MHz, CDCl<sub>3</sub>)** δ (ppm): 7.83 (d, *J* = 7.2 Hz, 1H), 7.70 (d, *J* = 9.0 Hz, 1H), 7.60 – 7.53 (m, 2H), 7.48 – 7.41 (m, 2H), 7.40 (d, *J* = 9.0 Hz, 1H), 7.38 – 7.32 (m, 5H), 7.32 – 7.28 (m, 1H), 5.98 (t, *J* = 4.8 Hz, 1H), 5.62 (d, *J* = 13.2 Hz, 1H), 5.23 – 5.17 (m, 1H), 4.86 (d, *J* = 15.0 Hz, 1H), 4.71 (q, *J* = 6.0 Hz, 1H).

**<sup>13</sup>C NMR (150 MHz, CDCl<sub>3</sub>)** δ (ppm): 167.9, 167.3, 140.9, 140.6, 140.5, 140.3, 132.7, 131.5, 131.2, 131.0, 130.8, 128.8, 128.5, 127.9, 127.5, 127.4, 127.4, 126.7, 124.2, 64.9, 61.1.

**HRMS (ESI)** *m/z* calculated for C<sub>24</sub>H<sub>18</sub>O<sub>4</sub>+Na<sup>+</sup>: 393.1097, found: 393.1097.

**(Z)-8-(4-bromophenyl)-7,10-dihydrodibenzo[h,i][1,6]dioxacyclododecine-5,12-dione 7b**

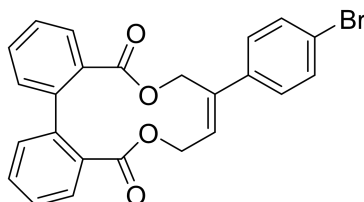

Prepared according to the general procedure to afford **7b** (23.3 mg, m. p. = 143 – 144 °C) in 52% yield as white solid.

*NMR and HRMS data for the product 7b:*

**<sup>1</sup>H NMR (600 MHz, CDCl<sub>3</sub>)** δ (ppm): 7.83 (d, *J* = 7.8 Hz, 1H), 7.70 (d, *J* = 7.8 Hz, 1H), 7.62 – 7.53 (m, 2H), 7.48 – 7.41 (m, 4H), 7.40 – 7.34 (m, 2H), 7.23 (d, *J* = 8.4 Hz, 2H), 5.97 (t, *J* = 4.8 Hz, 1H), 5.54 (d, *J* = 15.0 Hz, 1H), 5.23 – 5.17 (m, 1H), 4.81 (d, *J* = 15.0 Hz, 1H), 4.69 (dd, *J* = 14.4, 6.0 Hz, 1H).

**<sup>13</sup>C NMR (150 MHz, CDCl<sub>3</sub>)** δ (ppm): 167.8, 167.2, 140.6, 140.5, 139.9, 139.1, 132.4, 131.6, 131.3, 131.0, 131.0, 130.8, 128.9, 128.4, 127.6, 127.5, 127.5, 125.1, 122.0, 64.5, 61.0.

**HRMS (ESI)** *m/z* calculated for C<sub>24</sub>H<sub>17</sub>BrO<sub>4</sub>+Na<sup>+</sup>: 471.0202 (<sup>79</sup>Br), 473.0182 (<sup>81</sup>Br), found:

471.0191, 473.0174.

**(Z)-8-(p-tolyl)-7,10-dihydrodibenzo[h,j][1,6]dioxacyclododecine-5,12-dione 7c**

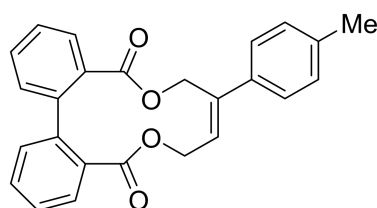

Prepared according to the general procedure to afford **7c** (24.2 mg, m. p. = 136 – 137 °C) in 63% yield as white solid.

*NMR and HRMS data for the product 7c:*

**<sup>1</sup>H NMR (600 MHz, CDCl<sub>3</sub>)** δ (ppm): 7.83 (d, *J* = 7.8 Hz, 1H), 7.71 (d, *J* = 7.2 Hz, 1H), 7.62 – 7.53 (m, 2H), 7.48 – 7.43 (m, 2H), 7.42 – 7.34 (m, 2H), 7.27 (d, *J* = 8.4 Hz, 2H), 7.16 (d, *J* = 7.2 Hz, 2H), 5.97 (t, *J* = 6.6 Hz, 1H), 5.63 (d, *J* = 15.0 Hz, 1H), 5.23 – 5.17 (m, 1H), 4.85 (d, *J* = 15.0 Hz, 1H), 4.69 (dd, *J* = 14.4, 6.0 Hz, 1H), 2.36 (s, 3H).

**<sup>13</sup>C NMR (150 MHz, CDCl<sub>3</sub>)** δ (ppm): 167.9, 167.3, 140.5, 140.4, 140.3, 137.9, 137.8, 132.8, 131.5, 131.1, 131.0, 130.8, 129.1, 128.8, 127.5, 127.4, 126.6, 123.3, 65.0, 61.1, 21.1.

**HRMS (ESI)** *m/z* calculated for C<sub>25</sub>H<sub>20</sub>O<sub>4</sub>+H<sup>+</sup>: 385.1434, found: 385.1438.

**(Z)-3-phenyl-1,6-dioxacycloundec-3-ene-7,11-dione 8a**

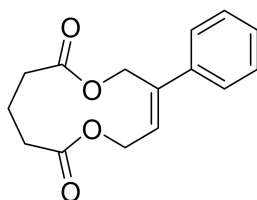

Prepared according to the general procedure to afford **8a** (19.0 mg) in 73% yield as colorless liquid.

*NMR and HRMS data for the product 8a:*

**<sup>1</sup>H NMR (600 MHz, CDCl<sub>3</sub>)** δ (ppm): 7.45 – 7.42 (m, 2H), 7.41 – 7.35 (m, 2H), 7.34 – 7.28 (m, 1H), 6.37 (t, *J* = 7.8 Hz, 1H), 4.98 (s, 2H), 4.72 (d, *J* = 7.8 Hz, 2H), 2.46 – 2.41 (m, 4H), 2.15 – 2.10 (m, 2H).

**<sup>13</sup>C NMR (150 MHz, CDCl<sub>3</sub>)** δ (ppm): 172.9, 172.5, 144.4, 140.6, 128.6, 128.2, 127.5, 126.1, 62.3, 59.1, 34.7, 34.5, 21.9.

**HRMS (ESI)**  $m/z$  calculated for  $C_{15}H_{16}O_4+Na^+$ : 283.0941, found: 283.0940.

**(Z)-3-(naphthalen-2-yl)-1,6-dioxacycloundec-3-ene-7,11-dione 8b**

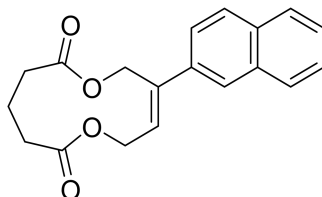

Prepared according to the general procedure to afford **8b** (26.7 mg, m. p. = 105 – 108 °C) in 86% yield as white solid.

*NMR and HRMS data for the product 8b:*

**<sup>1</sup>H NMR (600 MHz, CDCl<sub>3</sub>)**  $\delta$  (ppm): 7.88 (s, 1H), 7.86 – 7.81 (m, 3H), 7.59 – 7.56 (m, 1H), 7.52 – 7.47 (m, 2H), 6.52 (t,  $J$  = 7.2 Hz, 1H), 5.09 (s, 2H), 4.78 (d,  $J$  = 6.6 Hz, 2H), 2.50 – 2.44 (m, 4H), 2.18 – 2.13 (m, 2H).

**<sup>13</sup>C NMR (150 MHz, CDCl<sub>3</sub>)**  $\delta$  (ppm): 173.0, 172.5, 144.2, 137.8, 133.2, 133.0, 128.3, 128.2, 127.9, 127.6, 126.5, 126.4, 125.2, 124.1, 62.2, 59.2, 34.7, 34.5, 21.9.

**HRMS (ESI)**  $m/z$  calculated for  $C_{19}H_{18}O_4+Na^+$ : 333.1097, found: 333.1103.

**(Z)-3-([1,1'-biphenyl]-4-yl)-1,6-dioxacycloundec-3-ene-7,11-dione 8c**

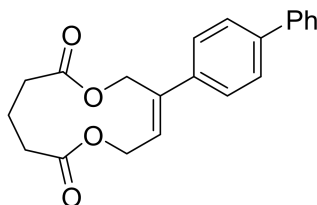

Prepared according to the general procedure to afford **8c** (26.2 mg, m. p. = 135 – 137 °C) in 78% yield as white solid.

*NMR and HRMS data for the product 8c:*

**<sup>1</sup>H NMR (600 MHz, CDCl<sub>3</sub>)**  $\delta$  (ppm): 7.63 – 7.58 (m, 4H), 7.54 – 7.51 (m, 2H), 7.45 (t,  $J$  = 7.8 Hz, 2H), 7.36 (t,  $J$  = 7.2 Hz, 1H), 6.44 (t,  $J$  = 7.2 Hz, 1H), 5.02 (s, 2H), 4.75 (d,  $J$  = 7.2 Hz, 2H), 2.49 – 2.42 (m, 4H), 2.17 – 2.11 (m, 2H).

**<sup>13</sup>C NMR (150 MHz, CDCl<sub>3</sub>)**  $\delta$  (ppm): 172.9, 172.5, 143.9, 141.1, 140.4, 139.4, 128.8, 127.5, 127.4, 127.3, 127.0, 126.6, 62.1, 59.2, 34.7, 34.5, 21.9.

**HRMS (ESI)**  $m/z$  calculated for  $C_{21}H_{20}O_4+Na^+$ : 359.1254, found: 359.1260.

**(Z)-11-phenyl-9,14-dioxaspiro[5.10]hexadec-11-ene-8,15-dione 8d**

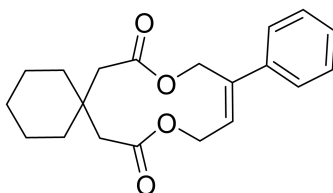

Prepared according to the general procedure to afford **8d** (23.0 mg) in 70% yield as colorless liquid.

*NMR and HRMS data for the product 8d:*

**<sup>1</sup>H NMR (600 MHz, CDCl<sub>3</sub>)** δ (ppm): 7.43 – 7.38 (m, 2H), 7.37 – 7.33 (m, 2H), 7.32 – 7.29 (m, 1H), 6.22 (t, *J* = 6.6 Hz, 1H), 4.99 (s, 2H), 4.74 (d, *J* = 7.2 Hz, 2H), 2.41 (s, 2H), 2.39 (s, 2H), 1.66 – 1.63 (m, 4H), 1.53 – 1.49 (m, 4H), 1.45 – 1.42 (m, 2H).

**<sup>13</sup>C NMR (150 MHz, CDCl<sub>3</sub>)** δ (ppm): 171.6, 171.3, 143.1, 140.9, 128.5, 128.0, 127.0, 126.2, 62.5, 59.2, 43.5, 43.1, 37.7, 37.5, 25.8, 21.6.

**HRMS (ESI)** *m/z* calculated for C<sub>20</sub>H<sub>24</sub>O<sub>4</sub>+Na<sup>+</sup>: 351.1567, found: 351.1567.

**(Z)-4-phenyl-3,6,9,10,11,12-hexahydrobenzo[*c*][1,6]dioxecine-1,8-dione 8e**

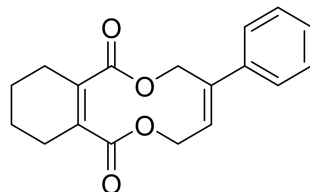

Prepared according to the general procedure to afford **8e** (21.2 mg, m. p. = 82 – 87 °C) in 71% yield as pink solid.

*NMR and HRMS data for the product 8e:*

**<sup>1</sup>H NMR (600 MHz, CDCl<sub>3</sub>)** δ (ppm): 7.45 (d, *J* = 7.2 Hz, 2H), 7.35 (t, *J* = 7.8 Hz, 2H), 7.32 – 7.29 (m, 1H), 6.16 (t, *J* = 6.0 Hz, 1H), 5.02 (s, 2H), 4.79 (d, *J* = 6.0 Hz, 2H), 2.45 – 2.41 (m, 4H), 1.82 – 1.79 (m, 1H), 1.71 – 1.67 (m, 3H).

**<sup>13</sup>C NMR (150 MHz, CDCl<sub>3</sub>)** δ (ppm): 168.9, 168.5, 143.3, 140.9, 137.7, 137.4, 128.5, 128.1, 126.7, 126.1, 65.7, 61.5, 25.7, 21.2, 20.8, 20.7.

**HRMS (ESI)** *m/z* calculated for C<sub>18</sub>H<sub>18</sub>O<sub>4</sub>+Na<sup>+</sup>: 321.1097, found: 321.1093.

**(Z)-6-phenyl-4,7-dihydro-3H-benzo[*c*][1,6]dioxacycloundecine-1,9-dione 12**

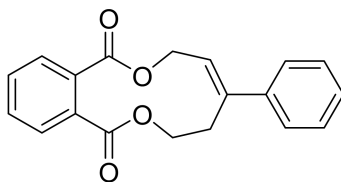

Prepared according to the general procedure to afford **12** (19.7 mg) in 64% yield as colorless liquid.

*NMR and HRMS data for the product 12:*

**<sup>1</sup>H NMR (600 MHz, CDCl<sub>3</sub>)** δ (ppm): 7.87 – 7.83 (m, 1H), 7.63 – 7.59 (m, 1H), 7.58 – 7.53 (m, 2H), 7.40 – 7.38 (m, 2H), 7.36 – 7.28 (m, 3H), 6.40 (t, *J* = 6.6 Hz, 1H), 4.83 (d, *J* = 6.6 Hz, 2H), 4.37 (br s, 2H), 3.02 (br s, 2H).

**<sup>13</sup>C NMR (150 MHz, CDCl<sub>3</sub>)** δ (ppm): 168.6, 166.9, 145.8, 140.4, 133.5, 131.7, 130.9, 130.8, 129.6, 128.6, 128.4, 128.1, 126.9, 124.8, 61.2, 60.3, 30.8.

**HRMS (ESI)** *m/z* calculated for C<sub>19</sub>H<sub>16</sub>O<sub>4</sub>+H<sup>+</sup>: 309.1121, found: 309.1123.



## 6. General Procedure for the Reactions of Linear Anhydrides and VECs

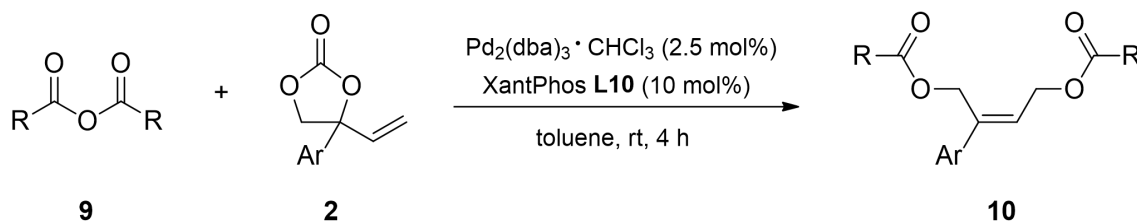

To an oven-dried Schlenk tube was added  $\text{Pd}_2(\text{dba})_3 \cdot \text{CHCl}_3$  (2.5 mol%) and XantPhos (10 mol%), after which the tube was evacuated and back-filled with argon three times. Then under the protection of argon, dry toluene (1.0 mL) was added and stirred at room temperature for 30 min. Subsequently, under the protection of argon, linear anhydrides **9** (0.10 mmol) and vinyl ethylene carbonates **2** (0.15 mmol) were added and the reaction mixture was stirred at room temperature for 4 hours. Then the mixture was directly purified by column chromatography on silica gel (petroleum ether/ethyl acetate = 10/1 to 3/1) to afford the corresponding **10** in 55–57% yields, which were dried under vacuum and further analyzed by  $^1\text{H}$  NMR,  $^{13}\text{C}$  NMR, HRMS, *etc.*

### (Z)-2-phenylbut-2-ene-1,4-diyl dipropionate 10a

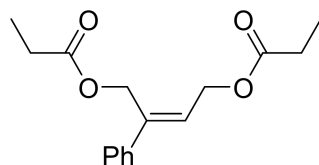

Prepared according to the general procedure to afford **10a** (15.7 mg) in 57% yield as colorless semisolid.

*NMR and HRMS data for the product 10a:*

$^1\text{H}$  NMR (600 MHz,  $\text{CDCl}_3$ )  $\delta$  (ppm): 7.43 – 7.38 (m, 2H), 7.37 – 7.32 (m, 2H), 7.31 – 7.28 (m, 1H), 6.07 (t,  $J = 6.6$  Hz, 1H), 5.07 (s, 2H), 4.88 (d,  $J = 7.2$  Hz, 2H), 2.36 (q,  $J = 7.8$  Hz, 2H), 2.27 (q,  $J = 7.8$  Hz, 2H), 1.16 (t,  $J = 7.8$  Hz, 3H), 1.07 (t,  $J = 7.8$  Hz, 3H).

$^{13}\text{C}$  NMR (150 MHz,  $\text{CDCl}_3$ )  $\delta$  (ppm): 174.2, 174.1, 139.4, 138.7, 128.4, 127.9, 127.3, 126.4, 60.9, 60.7, 27.5, 27.4, 9.0, 9.0.

HRMS (ESI)  $m/z$  calculated for  $\text{C}_{16}\text{H}_{20}\text{O}_4 + \text{Na}^+$ : 299.1254, found: 299.1255.

### (Z)-2-(4-chlorophenyl)but-2-ene-1,4-diyl diacetate 10b

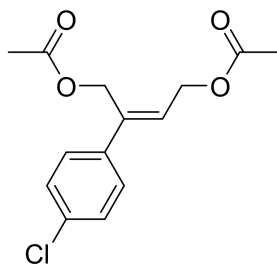

Prepared according to the general procedure to afford **10b** (15.6 mg, m. p. = 51 – 55 °C) in 55% yield as white solid.

*NMR and HRMS data for the product 10b:*

**<sup>1</sup>H NMR (600 MHz, CDCl<sub>3</sub>)** δ (ppm): 7.32 – 7.29 (m, 2H), 7.28 – 7.25 (m, 2H), 6.02 (t, *J* = 6.6 Hz, 1H), 4.99 (s, 2H), 4.83 (d, *J* = 7.2 Hz, 2H), 2.05 (s, 3H), 1.97 (s, 3H).

**<sup>13</sup>C NMR (150 MHz, CDCl<sub>3</sub>)** δ (ppm): 170.5, 170.4, 137.6, 137.4, 133.7, 128.4, 127.6, 127.5, 60.5, 60.5, 20.7, 20.6.

**HRMS (ESI)** *m/z* calculated for C<sub>14</sub>H<sub>15</sub>ClO<sub>4</sub>+Na<sup>+</sup>: 305.0551(<sup>35</sup>Cl), 307.0522 (<sup>37</sup>Cl), found: 305.0564, 307.0504.

## 7. Synthetic Transformation of 5a and 10b

### 7.1 Procedure for the hydrogenation of lactone 3a

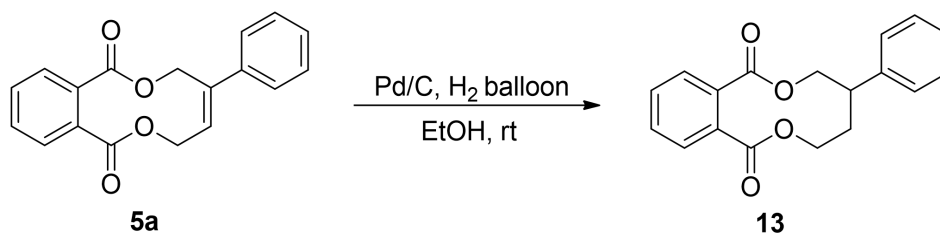

The ten-membered lactone **3a** (0.1 mmol, 29.4 mg) was dissolved in dry ethanol (1.0 mL). This mixture was degassed of dissolved air and purged with an argon atmosphere. To it 5% Pd/C (8.0 mg) was carefully added. The above reaction mixture was degassed and purged with hydrogen. Then the reaction was stirred for 12 hours at room temperature with hydrogen balloon. After the completion of the reaction, the mixture was filtered through a plug of silica (eluting with DCM) and concentrated under reduced pressure. The residue was purified by column chromatography on silica gel (petroleum ether/ ethyl acetate = 50/1 to 40/1) to afford **13** (12.4 mg) as white solid in 42% yields, which was dried under vacuum and further analyzed by  $^1\text{H}$  NMR,  $^{13}\text{C}$  NMR, HRMS, *etc.*

### 4-phenyl-3,4,5,6-tetrahydrobenzo[c][1,6]dioxecine-1,8-dione 13

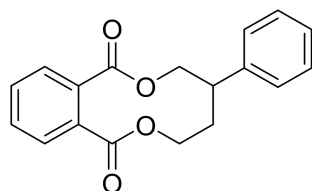

Purification of the crude product *via* column chromatography delivered **13** (12.4 mg, m. p. = 135 – 136 °C) in 42% yield as white solid.

*NMR and HRMS data for the product 13:*

$^1\text{H}$  NMR (600 MHz,  $\text{CDCl}_3$ )  $\delta$  (ppm): 7.78 – 7.75 (m, 2H), 7.60 – 7.56 (m, 2H), 7.37 – 7.33 (m, 2H), 7.28 – 7.23 (m, 3H), 4.92 – 4.87 (m, 1H), 4.76 (dd,  $J = 11.4, 4.8$  Hz, 1H), 4.11 – 4.06 (m, 1H), 3.94 (t,  $J = 10.8$  Hz, 1H), 3.32 – 3.27 (m, 1H), 2.61 – 2.54 (m, 1H), 2.06 (d,  $J = 13.8$  Hz, 1H).

$^{13}\text{C}$  NMR (150 MHz,  $\text{CDCl}_3$ )  $\delta$  (ppm): 168.0, 167.7, 142.2, 133.0, 132.8, 131.5, 131.5, 128.9, 128.9, 128.7, 127.5, 127.2, 69.9, 65.2, 43.8, 34.3.

HRMS (ESI)  $m/z$  calculated for  $\text{C}_{18}\text{H}_{16}\text{O}_4 + \text{H}^+$ : 297.1121, found: 297.1126.

## 7.2 Procedure for the hydrolysis of the linear ester **10b**

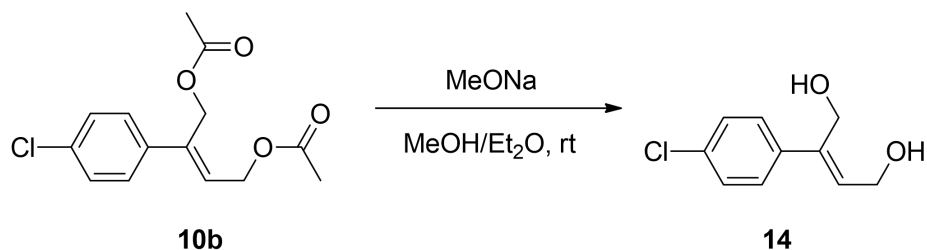

The linear ester **10b** (0.1 mmol, 28.2 mg) was dissolved in the mixture of MeOH/Et<sub>2</sub>O (2 mL, v/v = 1/1) and stirred at room temperature. To this solution was slowly added MeONa (0.02 mmol, 1 mg). The mixture was stirred for 5 h at the same temperature and quenched with 5 mL of saturated aqueous NH<sub>4</sub>Cl. The organic layer was separated and the aqueous layer was extracted with ethyl acetate (5 mL × 3). The organic layer was dried over Na<sub>2</sub>SO<sub>4</sub>, filtered and concentrated in vacuo. The crude product was purified by column chromatography on silica gel (petroleum ether/ethyl acetate = 3/1 to 1/1) to afford **14** (19.1 mg) as colorless semisolid in 96% yields, which was dried under vacuum and further analyzed by <sup>1</sup>H NMR, <sup>13</sup>C NMR, HRMS, *etc.*

### (Z)-2-(4-chlorophenyl)but-2-ene-1,4-diol **14**

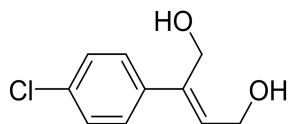

Purification of the crude product *via* column chromatography delivered **14** (19.1 mg) in 96% yield as colorless semisolid.

*NMR and HRMS data for the product **14**:*

**<sup>1</sup>H NMR (600 MHz, CDCl<sub>3</sub>)** δ (ppm): 7.38 – 7.34 (m, 2H), 7.33 – 7.27 (m, 2H), 6.07 (t, *J* = 6.6 Hz, 1H), 4.50 (s, 2H), 4.34 (d, *J* = 7.2 Hz, 2H), 2.82 (br s, 2H).

**<sup>13</sup>C NMR (150 MHz, CDCl<sub>3</sub>)** δ (ppm): 141.5, 138.9, 133.6, 130.1, 128.6, 127.6, 60.0, 58.7.

**HRMS (ESI)** *m/z* calculated for C<sub>10</sub>H<sub>11</sub>ClO<sub>2</sub>+Na<sup>+</sup>: 221.0340 (<sup>35</sup>Cl), 223.0310 (<sup>37</sup>Cl), found: 221.0339, 223.0304.

## 8. Experiments for Mechanism Studies

### 8.1 The competition experiments

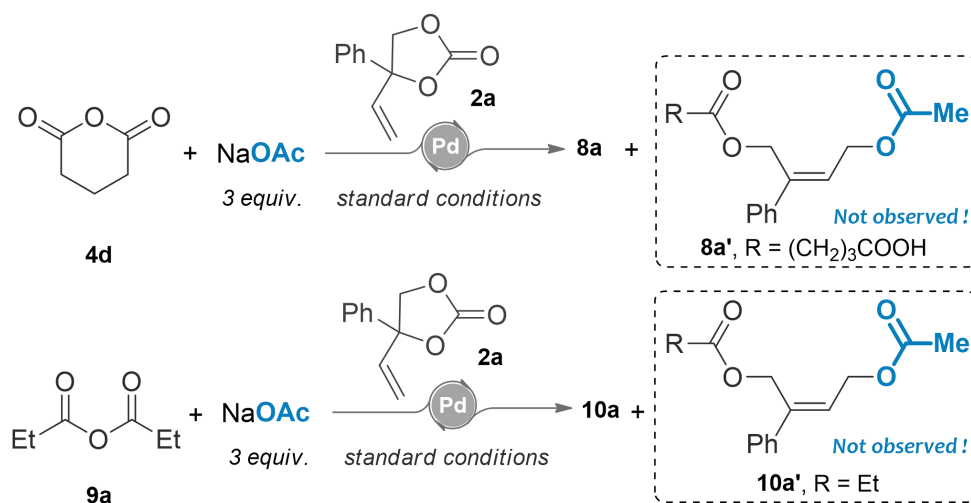

To explore the reaction mechanism, we performed several competition experiments based on the reaction of vinyl ethylene carbonate **2a** with cyclic anhydride **4d** or linear anhydride **9a**.

To three oven-dried Schlenk tubes were added Pd<sub>2</sub>(dba)<sub>3</sub>·CHCl<sub>3</sub> (2.5 mol%) and XantPhos (10 mol%), after which the tubes were evacuated and back-filled with argon three times. Then under the protection of argon, dry toluene (1.0 mL) was added and stirred at room temperature for 30 min. Subsequently, under the protection of argon, anhydride **4d** or **9a** (0.10 mmol), sodium acetate and vinyl ethylene carbonate **2a** (0.15 mmol) were added. The amounts of sodium acetate in the three reactions respectively refer to 0.10 mmol, 0.20 mmol and 0.30 mmol.

Then, the three reactions were stirred at room temperature for 4 hours, respectively. After then, the mixtures were filtered through a plug of silica (eluting with ethyl acetate) and concentrated, which were dried under vacuum further analyzed by <sup>1</sup>H NMR.

Even when three equivalents of the sodium acetate was added into the reaction mixture, the competitive product **8a'** or **10a'** was not observed, probably because the in-situ generated carboxylate is more likely to coordinate with palladium catalyst and then triggered an intramolecular attack of the π-allyl palladium moiety to deliver **8a** or **10a**.

## 8.2 Proposed reaction mechanism

Based on the results of competition experiments, a plausible mechanism for the catalytic cyclisation was proposed. As shown in Figure S1, the reaction was initiated by the palladium-catalysed decarboxylation of VEC **2a** to generate the zwitterionic  $\pi$ -allyl palladium intermediate **I**. Subsequently, the anhydride substrate was attacked by the alkoxide to form the intermediate **II**, in which the carboxylate moiety might be coordinated with palladium catalyst. Finally, a regioselective intramolecular allylation of the carboxylate and  $\pi$ -allyl palladium moieties occurred, which delivered diverse medium-sized lactone products.

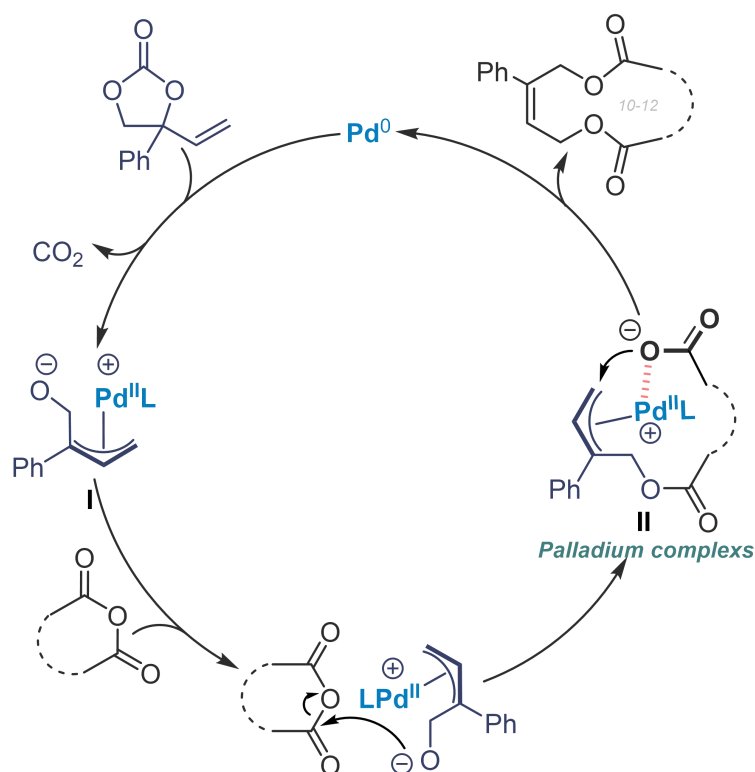

**Figure S1.** Proposed mechanism.

## 9. Crystal Data and Structure Refinement

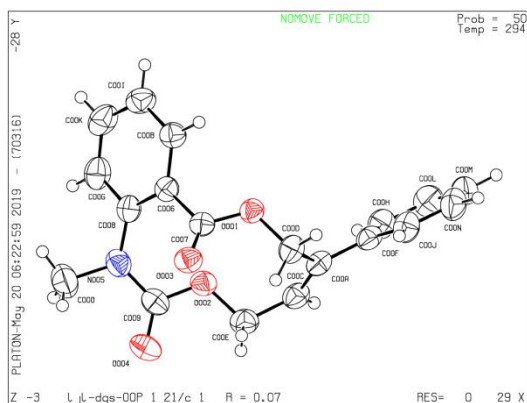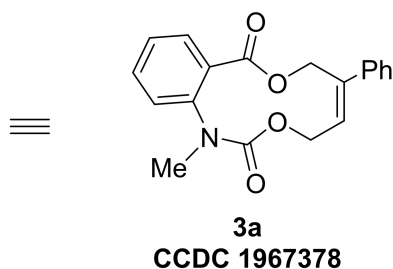

|                                             |                                                               |
|---------------------------------------------|---------------------------------------------------------------|
| Identification code                         | <b>3a</b>                                                     |
| Empirical formula                           | C <sub>19</sub> H <sub>17</sub> NO <sub>4</sub>               |
| Formula weight                              | 323.33                                                        |
| Temperature/K                               | 294(1)                                                        |
| Crystal system                              | monoclinic                                                    |
| Space group                                 | P2 <sub>1</sub> /c                                            |
| a/Å                                         | 15.6331(7)                                                    |
| b/Å                                         | 8.0735(3)                                                     |
| c/Å                                         | 12.5699(4)                                                    |
| α/°                                         | 90                                                            |
| β/°                                         | 92.556(3)                                                     |
| γ/°                                         | 90                                                            |
| Volume/Å <sup>3</sup>                       | 1584.92(11)                                                   |
| Z                                           | 4                                                             |
| ρ <sub>calc</sub> /cm <sup>3</sup>          | 1.355                                                         |
| μ/mm <sup>-1</sup>                          | 0.784                                                         |
| F(000)                                      | 680.0                                                         |
| Crystal size/mm <sup>3</sup>                | 0.5 × 0.4 × 0.1                                               |
| Radiation                                   | CuKα (λ = 1.54184)                                            |
| 2θ range for data collection/°              | 11.332 to 143.58                                              |
| Index ranges                                | -17 ≤ h ≤ 19, -9 ≤ k ≤ 7, -15 ≤ l ≤ 15                        |
| Reflections collected                       | 7262                                                          |
| Independent reflections                     | 3046 [R <sub>int</sub> = 0.0470, R <sub>sigma</sub> = 0.0466] |
| Data/restraints/parameters                  | 3046/0/218                                                    |
| Goodness-of-fit on F <sup>2</sup>           | 1.030                                                         |
| Final R indexes [I >= 2σ (I)]               | R <sub>1</sub> = 0.0698, wR <sub>2</sub> = 0.1807             |
| Final R indexes [all data]                  | R <sub>1</sub> = 0.0845, wR <sub>2</sub> = 0.2040             |
| Largest diff. peak/hole / e Å <sup>-3</sup> | 0.29/-0.40                                                    |

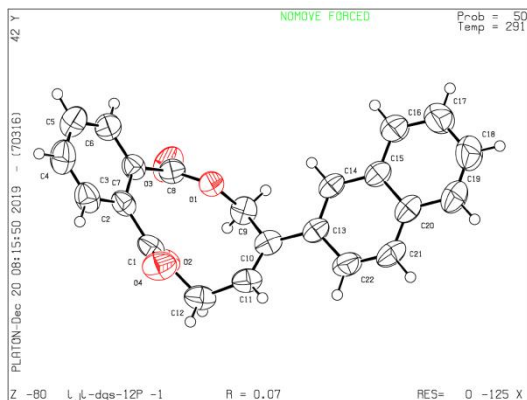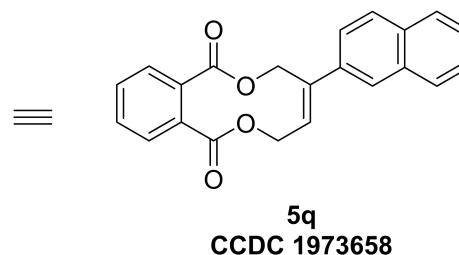

|                                             |                                                               |
|---------------------------------------------|---------------------------------------------------------------|
| Identification code                         | <b>5q</b>                                                     |
| Empirical formula                           | C <sub>22</sub> H <sub>16</sub> O <sub>4</sub>                |
| Formula weight                              | 344.35                                                        |
| Temperature/K                               | 291.3(6)                                                      |
| Crystal system                              | triclinic                                                     |
| Space group                                 | P-1                                                           |
| a/Å                                         | 4.8570(4)                                                     |
| b/Å                                         | 13.6775(14)                                                   |
| c/Å                                         | 14.0943(12)                                                   |
| α/°                                         | 114.792(9)                                                    |
| β/°                                         | 97.894(7)                                                     |
| γ/°                                         | 91.103(7)                                                     |
| Volume/Å <sup>3</sup>                       | 838.88(14)                                                    |
| Z                                           | 2                                                             |
| ρ <sub>calc</sub> /cm <sup>3</sup>          | 1.363                                                         |
| μ/mm <sup>-1</sup>                          | 0.764                                                         |
| F(000)                                      | 360.0                                                         |
| Crystal size/mm <sup>3</sup>                | 0.6 × 0.3 × 0.1                                               |
| Radiation                                   | CuKα (λ = 1.54184)                                            |
| 2θ range for data collection/°              | 6.998 to 142.692                                              |
| Index ranges                                | -4 ≤ h ≤ 5, -16 ≤ k ≤ 14, -17 ≤ l ≤ 17                        |
| Reflections collected                       | 6278                                                          |
| Independent reflections                     | 3145 [R <sub>int</sub> = 0.0334, R <sub>sigma</sub> = 0.0416] |
| Data/restraints/parameters                  | 3145/0/235                                                    |
| Goodness-of-fit on F <sup>2</sup>           | 1.067                                                         |
| Final R indexes [I ≥ 2σ (I)]                | R <sub>1</sub> = 0.0745, wR <sub>2</sub> = 0.2093             |
| Final R indexes [all data]                  | R <sub>1</sub> = 0.0846, wR <sub>2</sub> = 0.2242             |
| Largest diff. peak/hole / e Å <sup>-3</sup> | 0.27/-0.32                                                    |



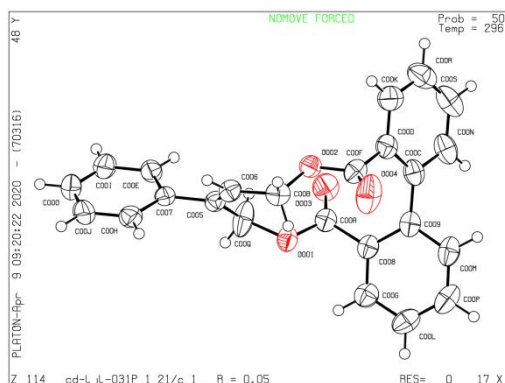

≡

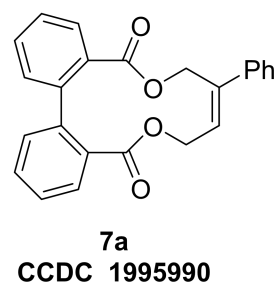

|                                             |                                                               |
|---------------------------------------------|---------------------------------------------------------------|
| Identification code                         | <b>7a</b>                                                     |
| Empirical formula                           | C <sub>24</sub> H <sub>18</sub> O <sub>4</sub>                |
| Formula weight                              | 370.38                                                        |
| Temperature/K                               | 295.9(2)                                                      |
| Crystal system                              | monoclinic                                                    |
| Space group                                 | P2 <sub>1</sub> /c                                            |
| a/Å                                         | 11.2786(3)                                                    |
| b/Å                                         | 10.8706(4)                                                    |
| c/Å                                         | 15.3317(4)                                                    |
| α/°                                         | 90                                                            |
| β/°                                         | 97.475(3)                                                     |
| γ/°                                         | 90                                                            |
| Volume/Å <sup>3</sup>                       | 1863.77(10)                                                   |
| Z                                           | 4                                                             |
| ρ <sub>calc</sub> /cm <sup>3</sup>          | 1.320                                                         |
| μ/mm <sup>-1</sup>                          | 0.727                                                         |
| F(000)                                      | 776.0                                                         |
| Crystal size/mm <sup>3</sup>                | 0.65 × 0.6 × 0.5                                              |
| Radiation                                   | CuKα (λ = 1.54184)                                            |
| 2θ range for data collection/°              | 7.906 to 142.576                                              |
| Index ranges                                | -8 ≤ h ≤ 13, -8 ≤ k ≤ 13, -18 ≤ l ≤ 18                        |
| Reflections collected                       | 11540                                                         |
| Independent reflections                     | 3544 [R <sub>int</sub> = 0.0521, R <sub>sigma</sub> = 0.0303] |
| Data/restraints/parameters                  | 3544/0/253                                                    |
| Goodness-of-fit on F <sup>2</sup>           | 1.076                                                         |
| Final R indexes [I >= 2σ (I)]               | R <sub>1</sub> = 0.0542, wR <sub>2</sub> = 0.1376             |
| Final R indexes [all data]                  | R <sub>1</sub> = 0.0603, wR <sub>2</sub> = 0.1443             |
| Largest diff. peak/hole / e Å <sup>-3</sup> | 0.25/-0.33                                                    |

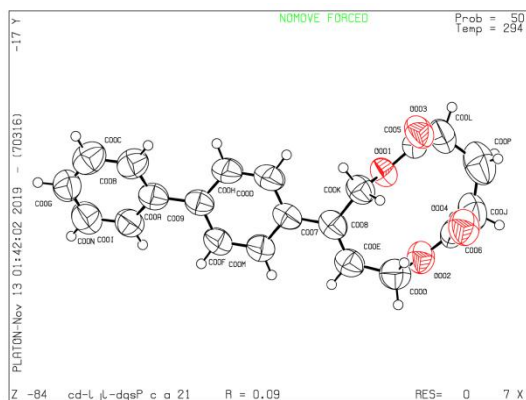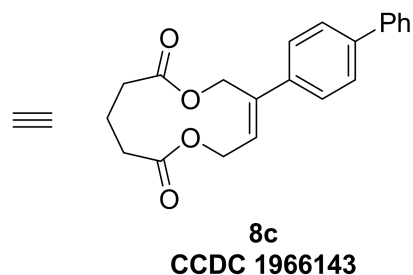

|                                             |                                                               |
|---------------------------------------------|---------------------------------------------------------------|
| Identification code                         | <b>8c</b>                                                     |
| Empirical formula                           | C <sub>21</sub> H <sub>20</sub> O <sub>4</sub>                |
| Formula weight                              | 336.37                                                        |
| Temperature/K                               | 293.9(5)                                                      |
| Crystal system                              | orthorhombic                                                  |
| Space group                                 | Pca2 <sub>1</sub>                                             |
| a/Å                                         | 10.5308(10)                                                   |
| b/Å                                         | 18.5025(16)                                                   |
| c/Å                                         | 8.7370(7)                                                     |
| α/°                                         | 90                                                            |
| β/°                                         | 90                                                            |
| γ/°                                         | 90                                                            |
| Volume/Å <sup>3</sup>                       | 1702.4(3)                                                     |
| Z                                           | 4                                                             |
| ρ <sub>calc</sub> /cm <sup>3</sup>          | 1.312                                                         |
| μ/mm <sup>-1</sup>                          | 0.732                                                         |
| F(000)                                      | 712.0                                                         |
| Crystal size/mm <sup>3</sup>                | 0.5 × 0.3 × 0.1                                               |
| Radiation                                   | CuKα (λ = 1.54184)                                            |
| 2θ range for data collection/°              | 9.56 to 143.526                                               |
| Index ranges                                | -12 ≤ h ≤ 12, -22 ≤ k ≤ 21, -10 ≤ l ≤ 8                       |
| Reflections collected                       | 5135                                                          |
| Independent reflections                     | 2438 [R <sub>int</sub> = 0.0394, R <sub>sigma</sub> = 0.0340] |
| Data/restraints/parameters                  | 2438/1/226                                                    |
| Goodness-of-fit on F <sup>2</sup>           | 1.043                                                         |
| Final R indexes [I ≥ 2σ (I)]                | R <sub>1</sub> = 0.0879, wR <sub>2</sub> = 0.2521             |
| Final R indexes [all data]                  | R <sub>1</sub> = 0.1008, wR <sub>2</sub> = 0.2838             |
| Largest diff. peak/hole / e Å <sup>-3</sup> | 0.60/-0.29                                                    |

## 10. References and Notes

- 1 (a) E. Krell, *Handbook of Laboratory Distillation*, Elsevier Publishing Company: Amsterdam-London-New York, 1963; (b) M. J. Rosengart, *The Technique of Distillation and Rectification in the Laboratory*, VEB Verlag Technik: Berlin, 1954; (c) F. Stage, *Angew. Chem.*, 1947, **19**, 175.
- 2 (a) F. Pin, S. Comesse and A. Daïch, *Tetrahedron*, 2011, **67**, 5564; (b) R. L. Clark, C. J. Clements, M. P. Barrett, S. P. Mackay, R. P. Rathnam, G. Owusu-Dapaah, J. Spencer and J. K. Huggan, *Bioorg. Med. Chem.*, 2012, **20**, 6019.
- 3 A. Khan, R. Zheng, Y. Kan, J. Ye, J. Xing and Y. J. Zhang, *Angew. Chem. Int. Ed.*, 2014, **53**, 6439.
- 4 (a) A. Farooq, J. Gordon, J. R. Hanson and J. A. Takahashi, *Phytochemistry*, 1995, **38**, 557–558; (b) X. Fu, T. Sévenet, F. Remy, M. Païs, A. H. A. Hadi and L. M. Zeng, *J. Nat. Prod.*, 1993, **56**, 1153–1163; (c) O. P. Suri and C. K. Atal, *Curr. Sci.*, 1967, **36**, 614–615; (d) S. B. Singh, H. Jayasuriya, D. L. Zink, J. D. Polishook, A. W. Dombrowski and H. Zweerink, *Tetrahedron Lett.*, 2004, **45**, 7605–7608; (e) A. Fürstner, G. Seidel and N. Kindler, *Tetrahedron*, 1999, **55**, 8215–8230; (f) S. S. Palimkar, J. Uenishi and H. Li, *J. Org. Chem.*, 2012, **77**, 388–399; (g) Y. Yan, L. Zhang, T. Ito, X. Qu, Y. Asakawa, T. Awakawa, I. Abe and Wen Liu, *Org. Lett.*, 2012, **14**, 4142–4145; (h) H. Tan, X. Yang, Q. Dai, Z. Deng, and X. Qu, *ACS Synth. Biol.*, 2019, **8**, 2659–2665.

## 11. NMR Spectra

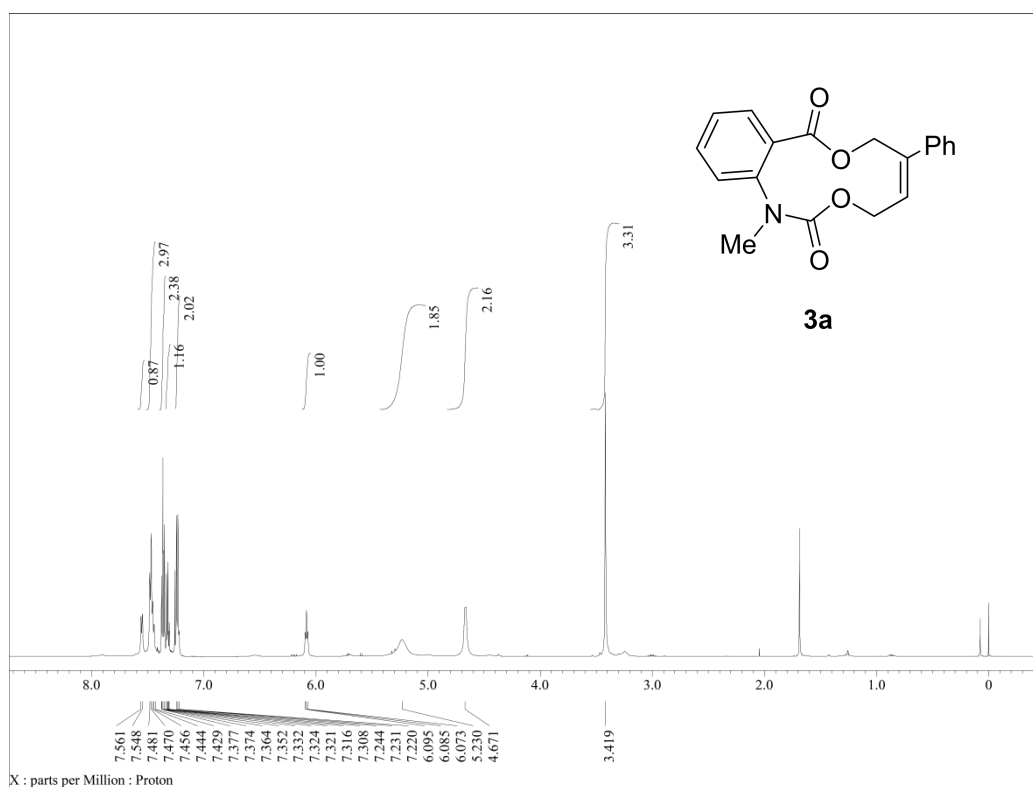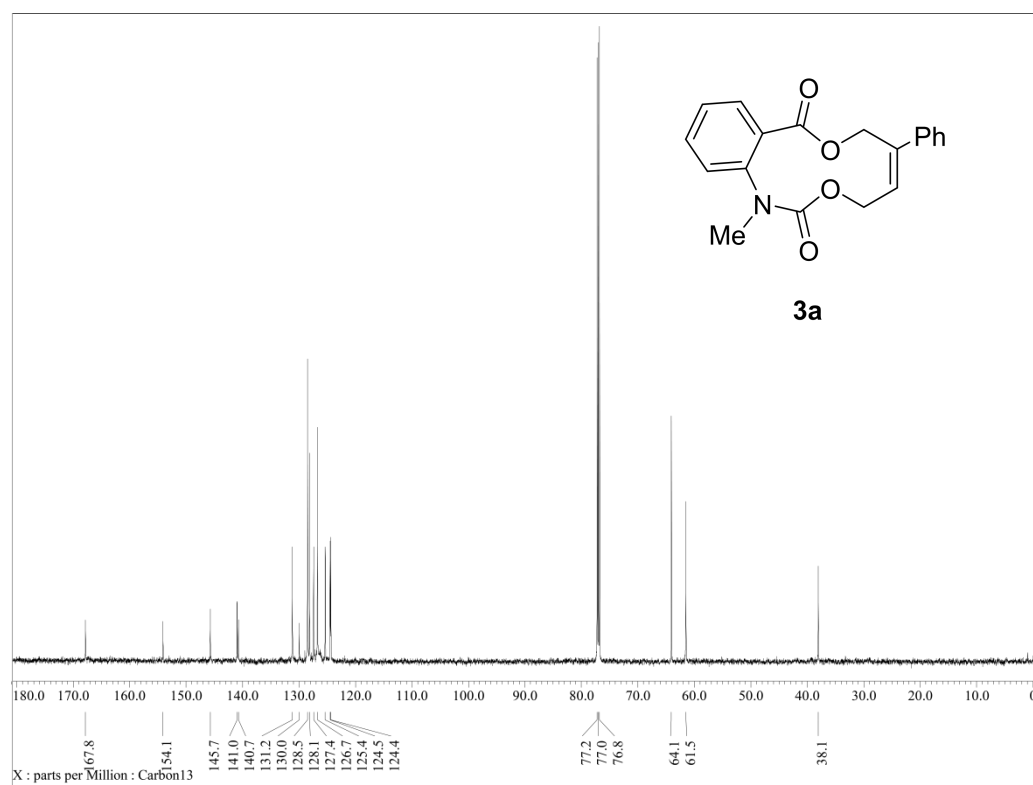

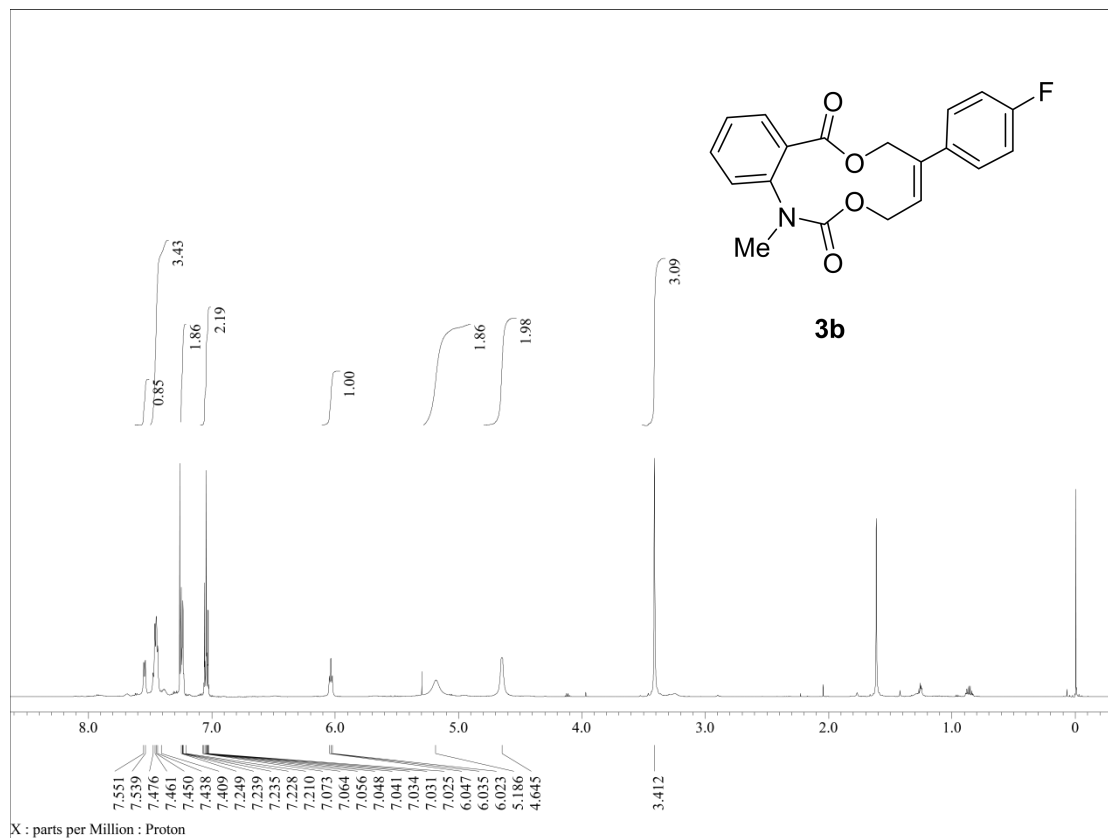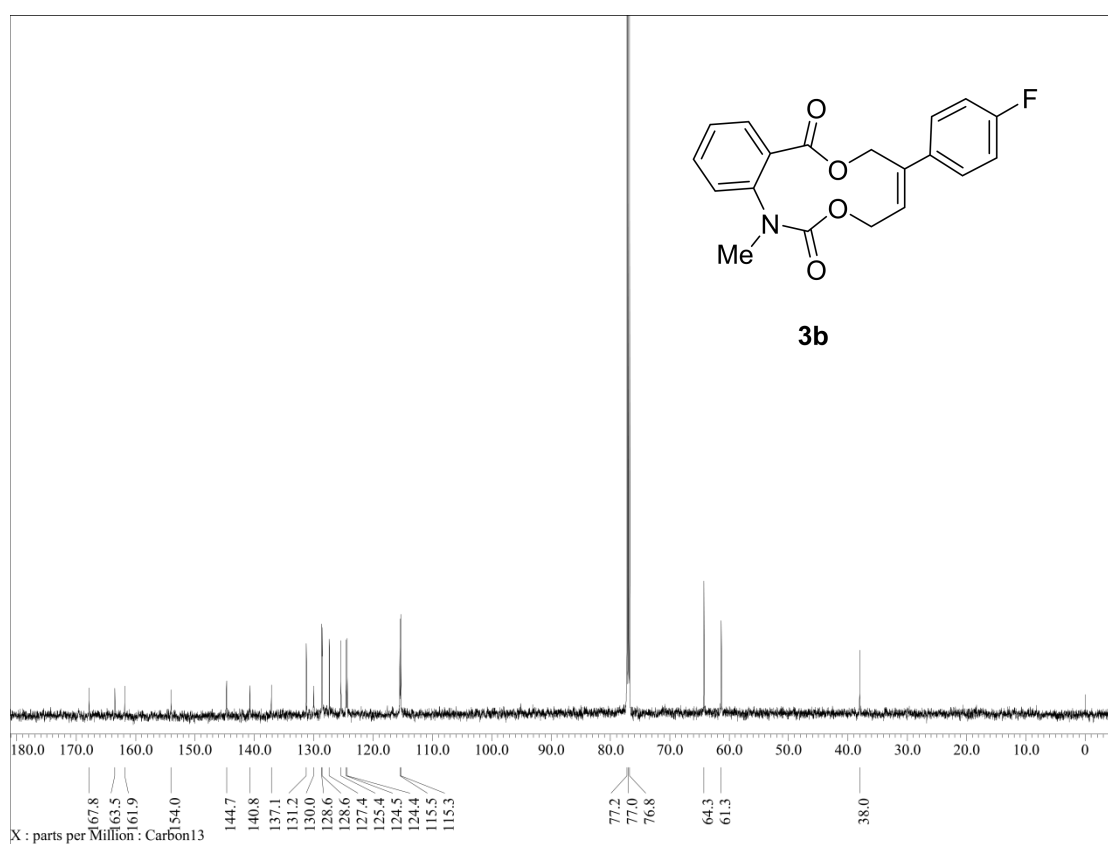

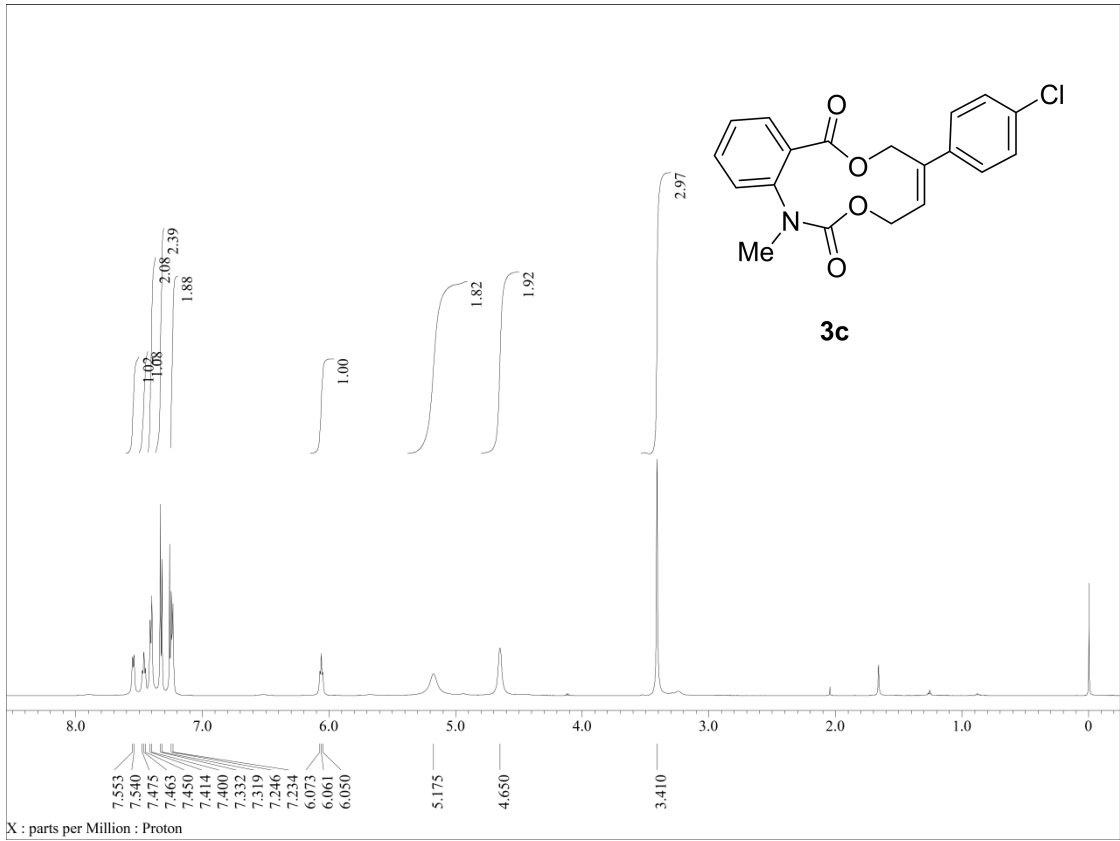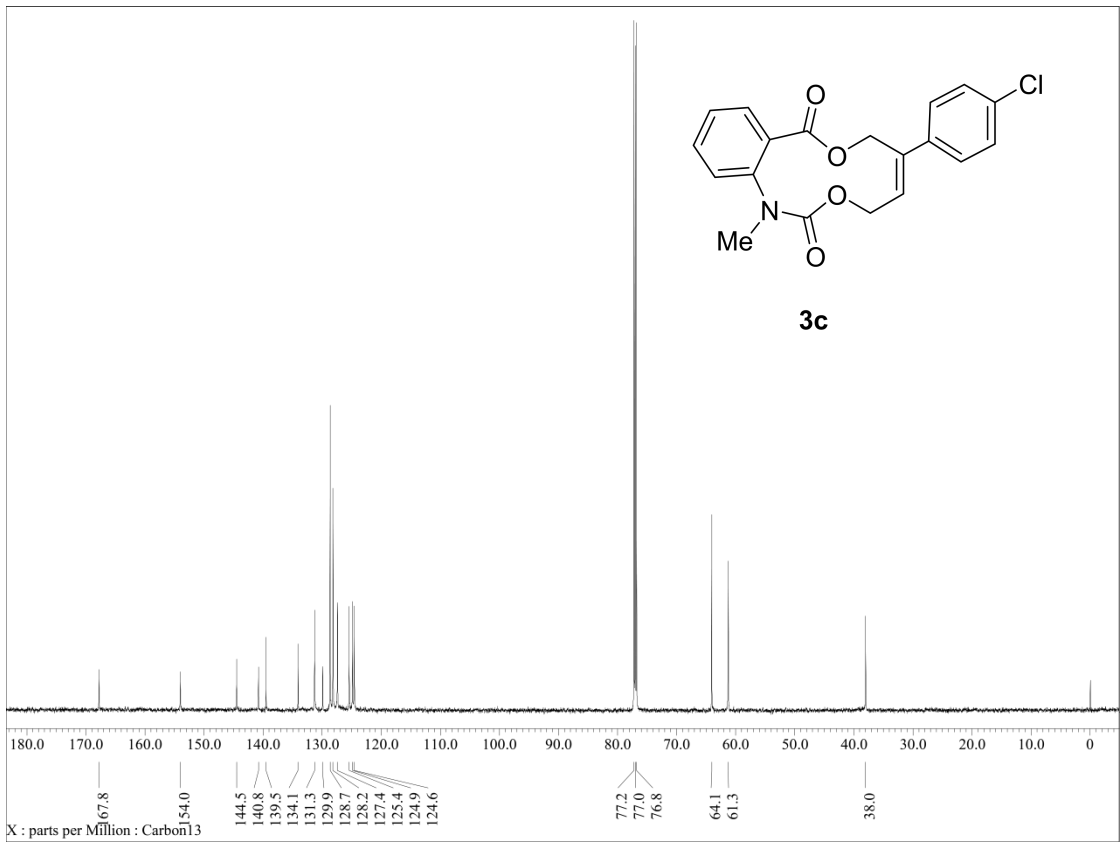

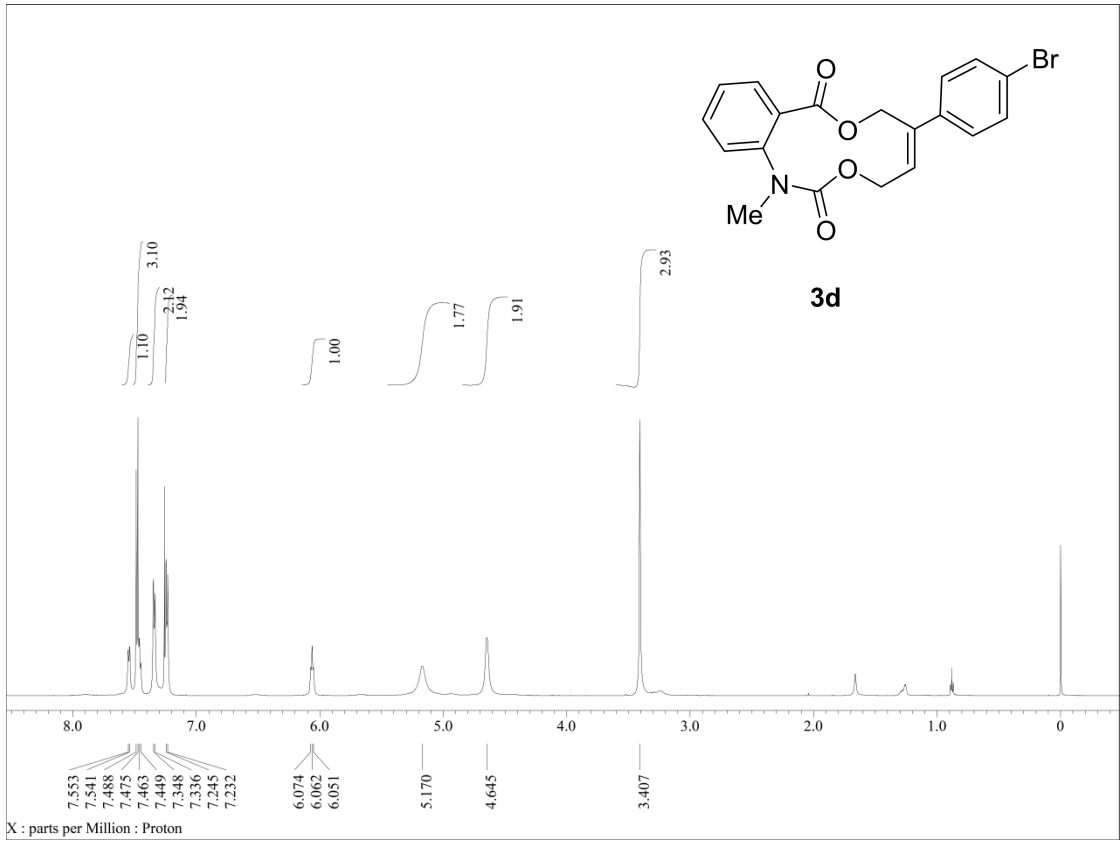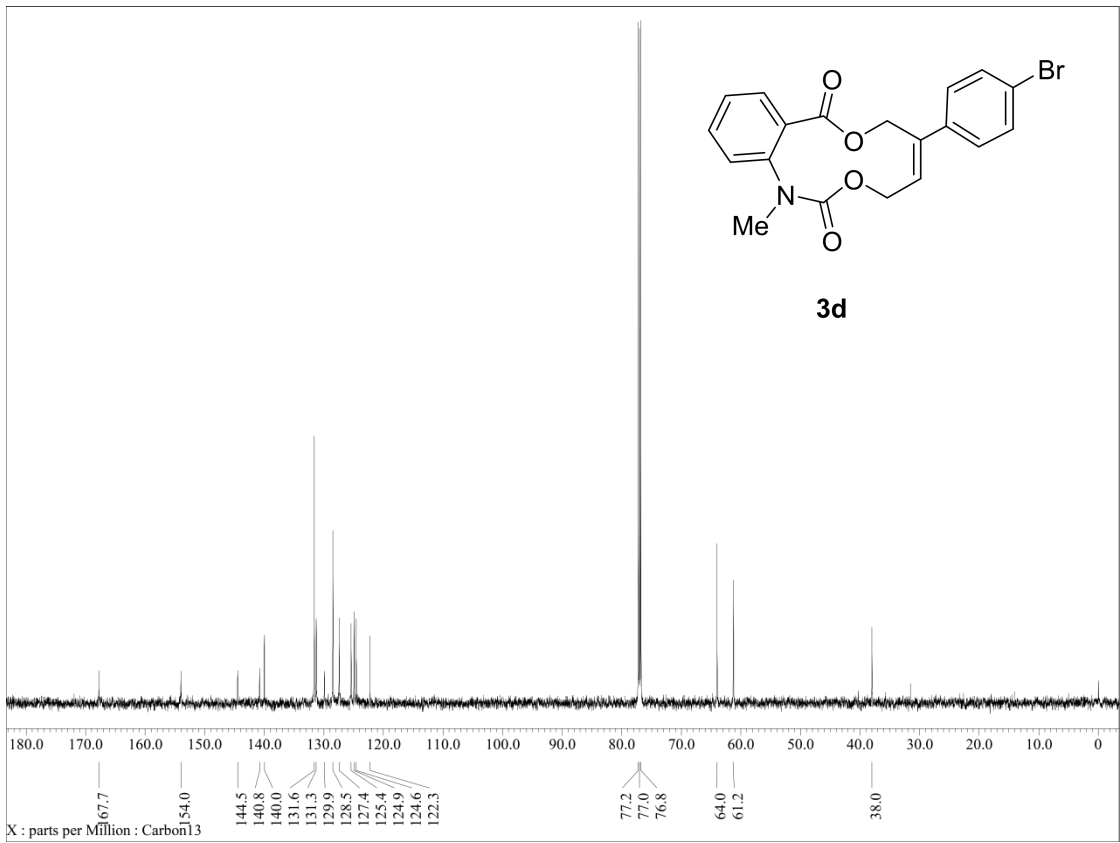

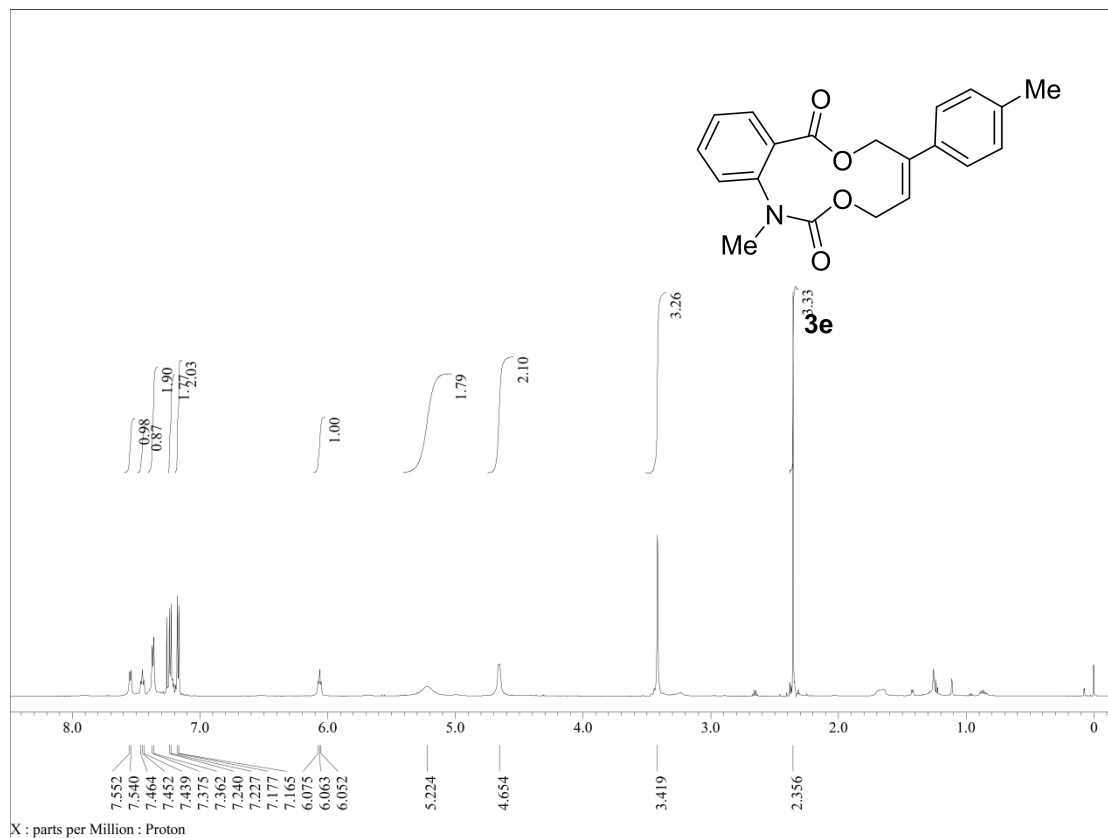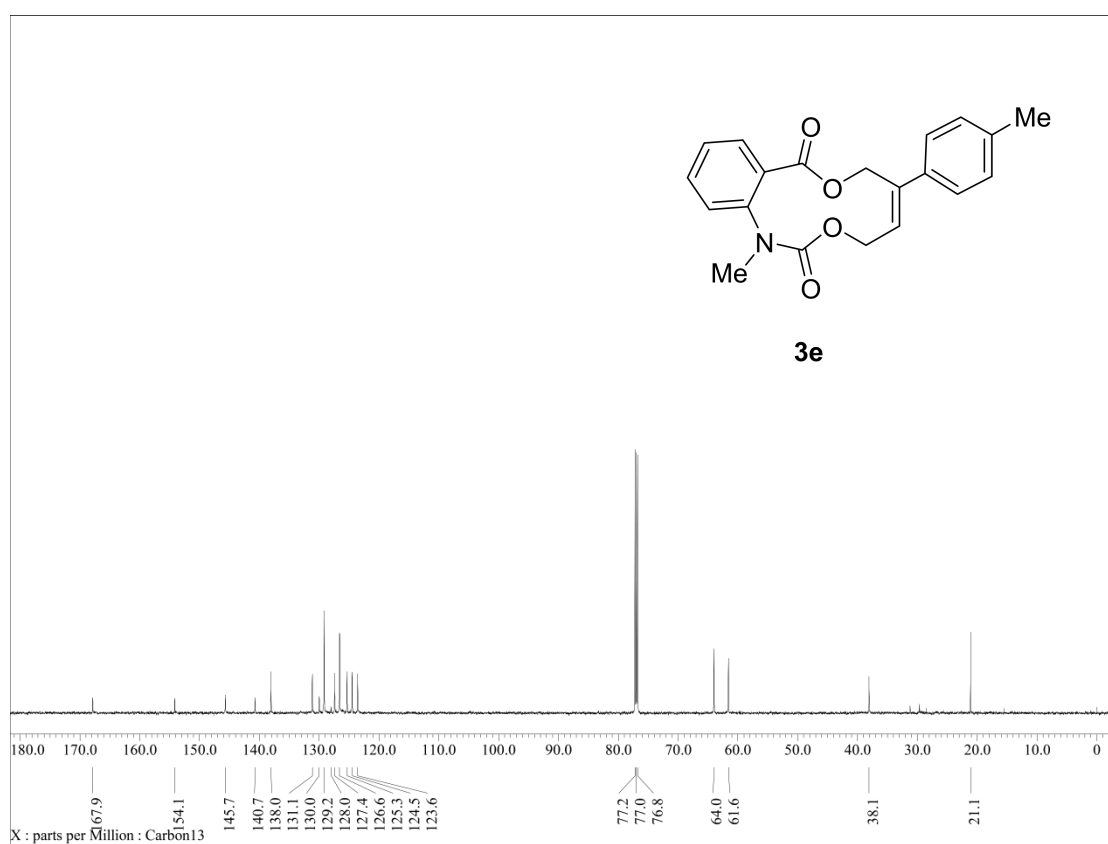



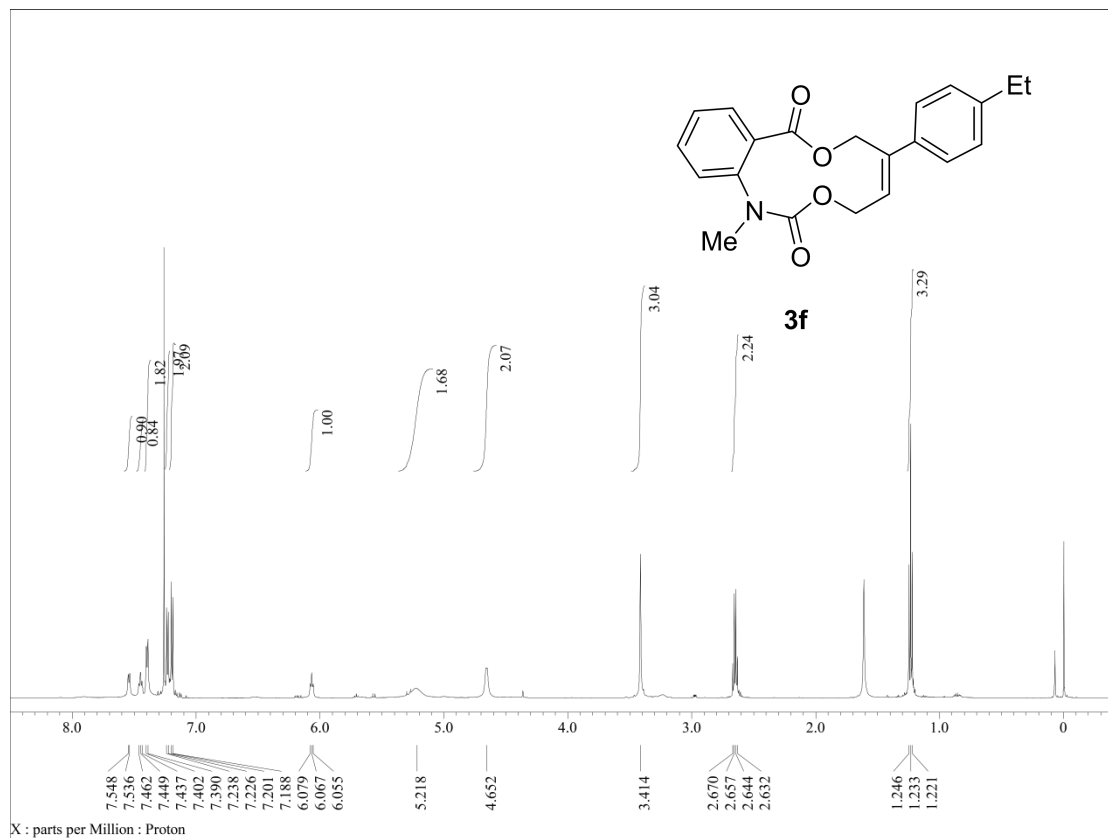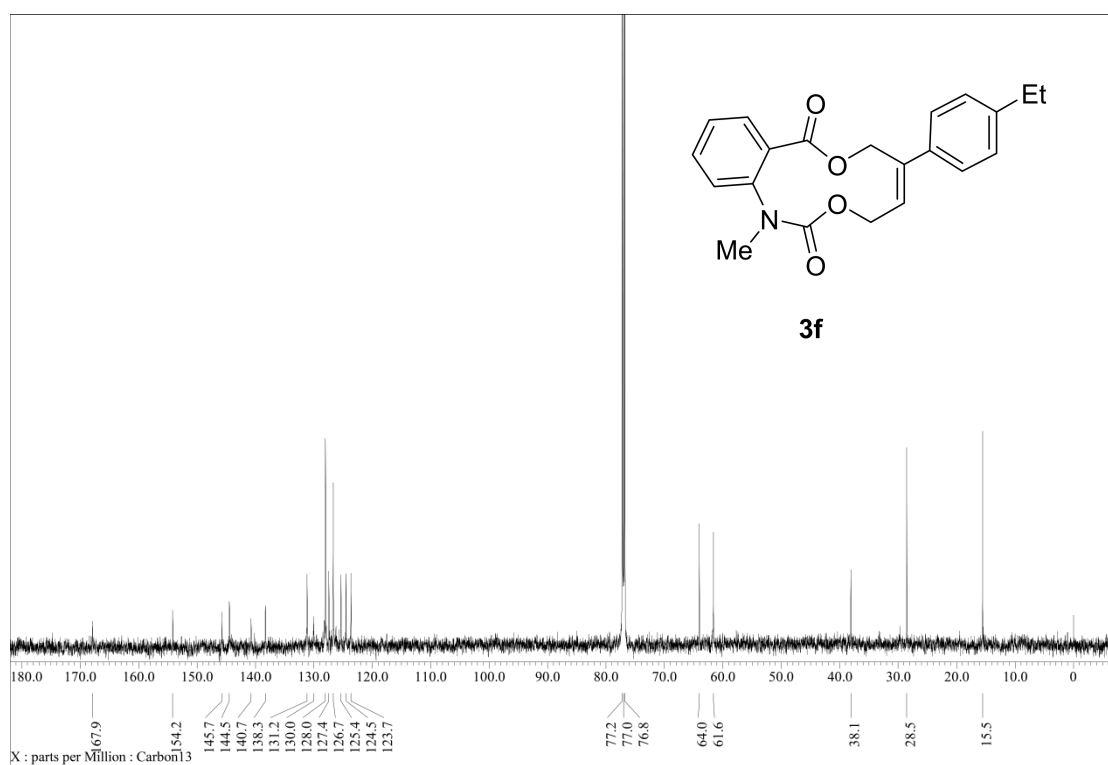

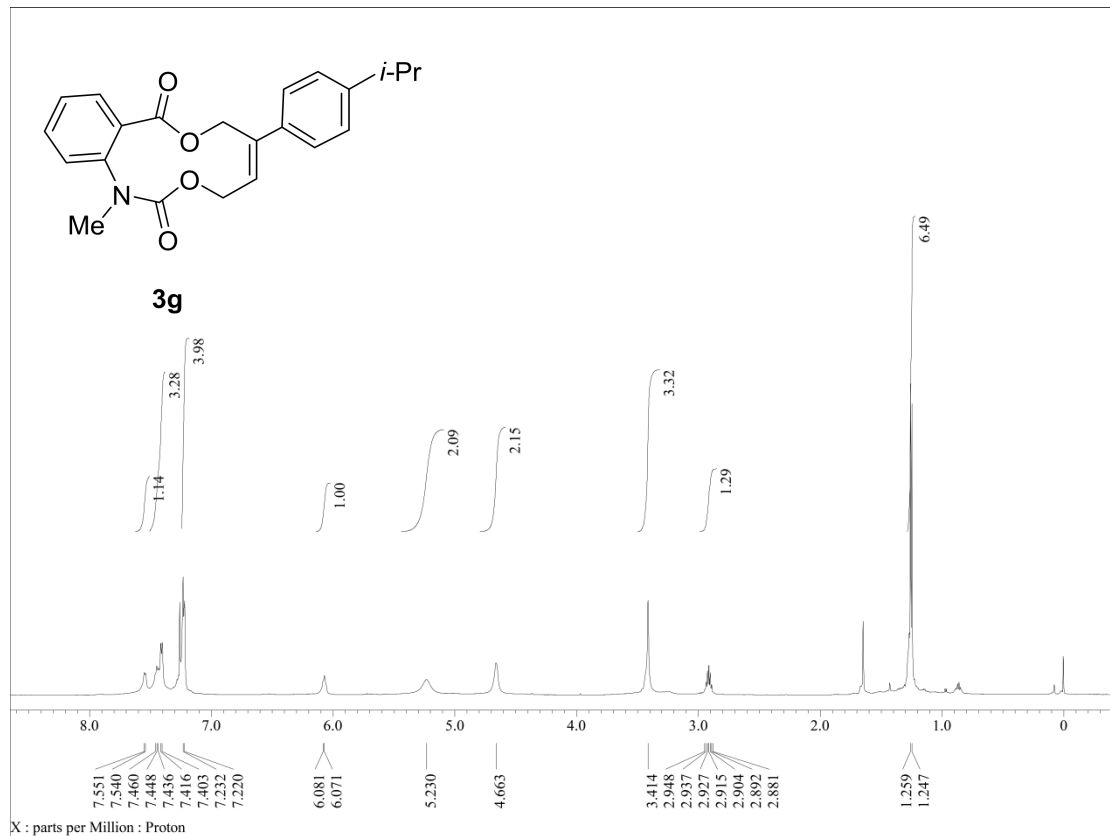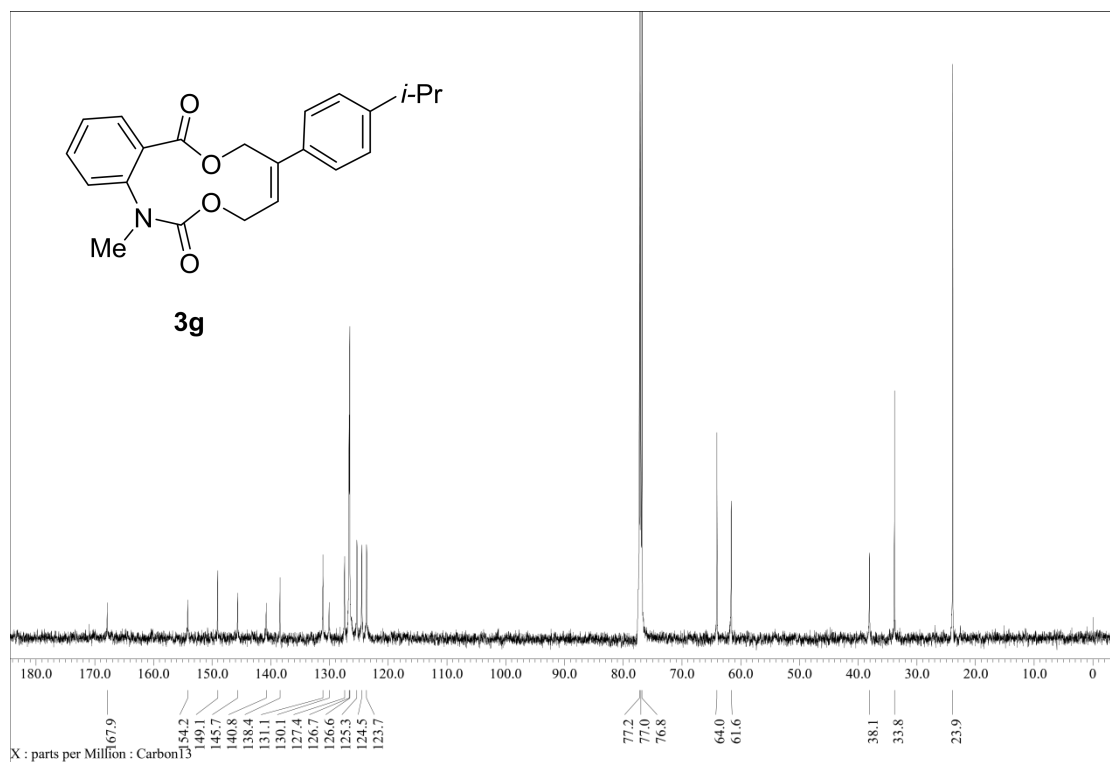

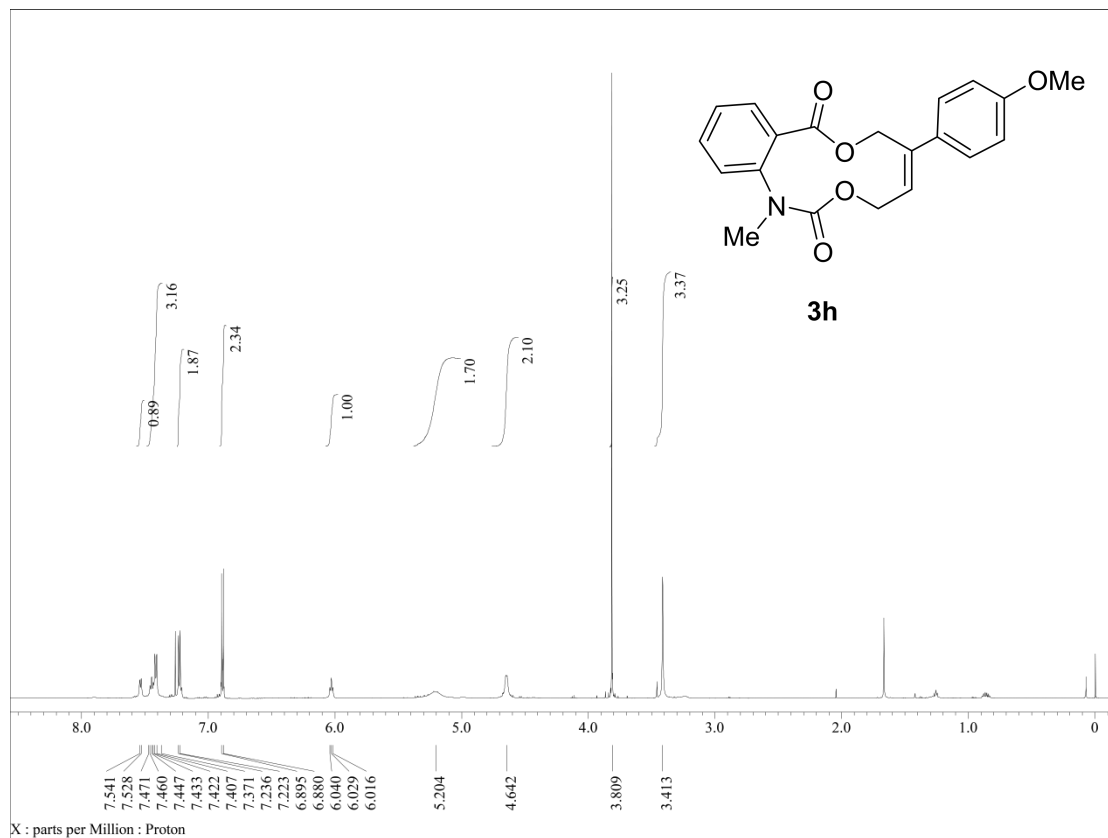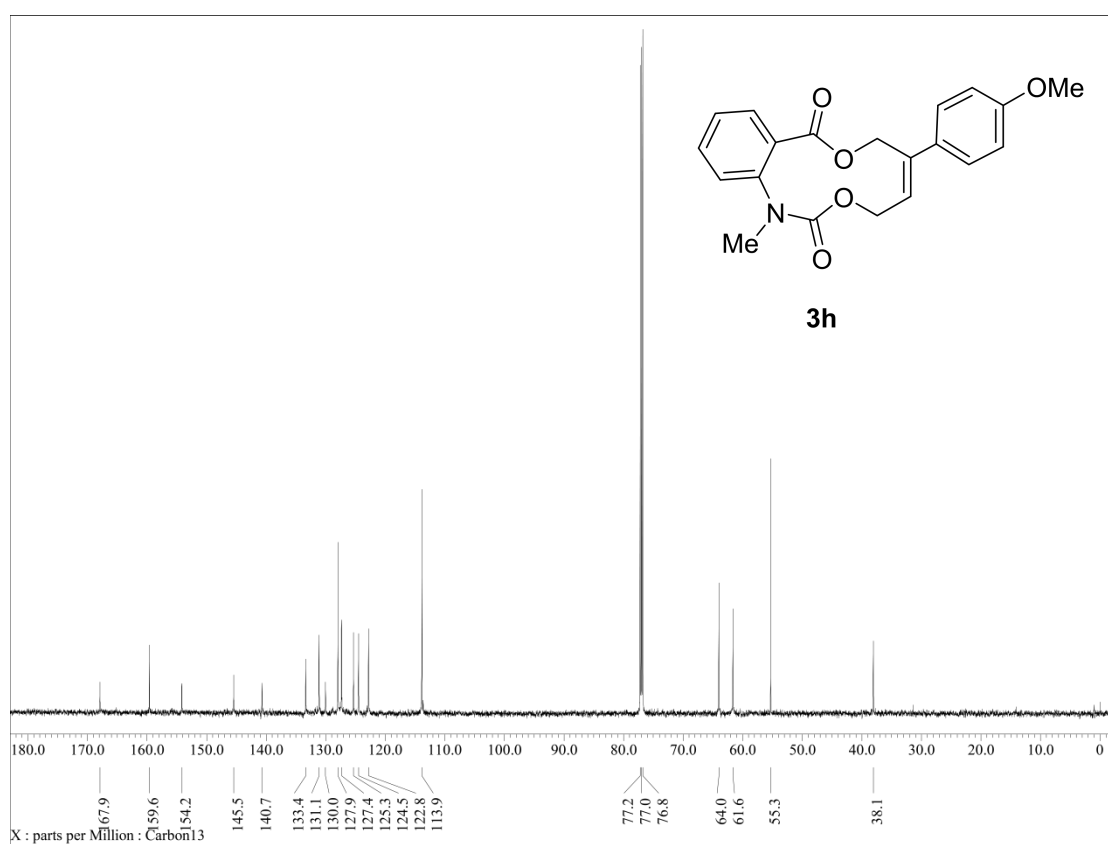

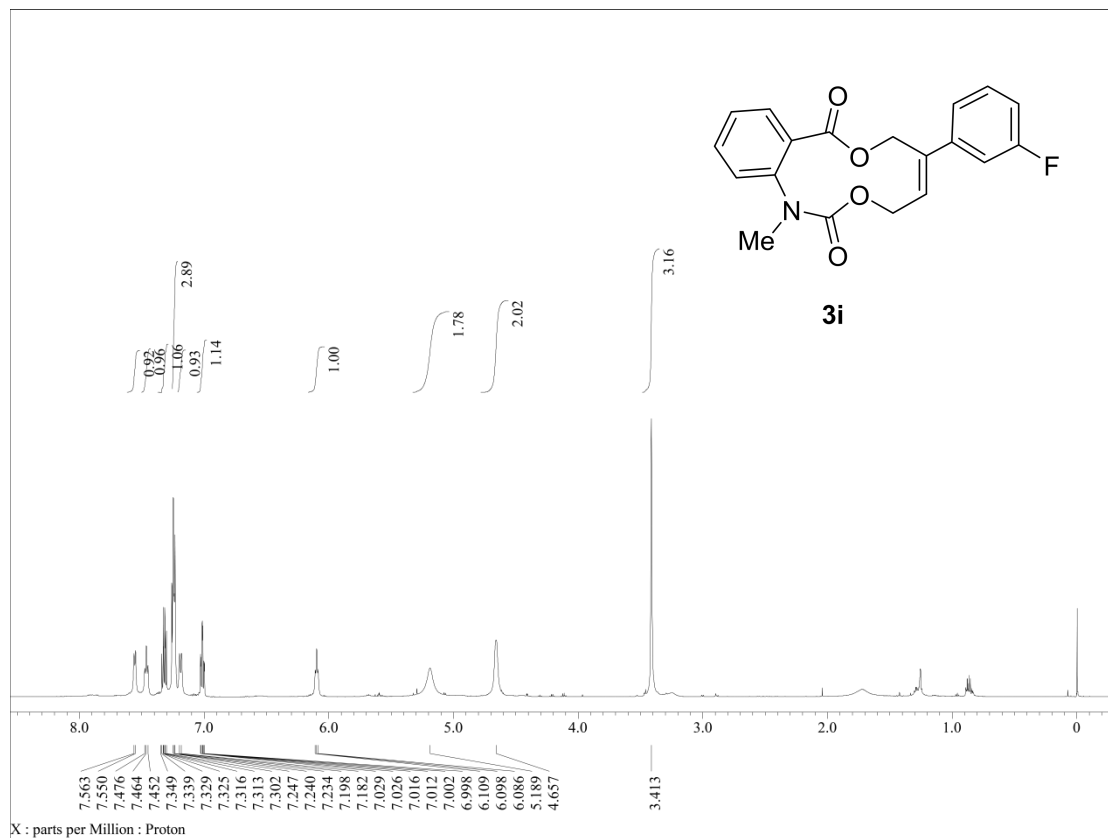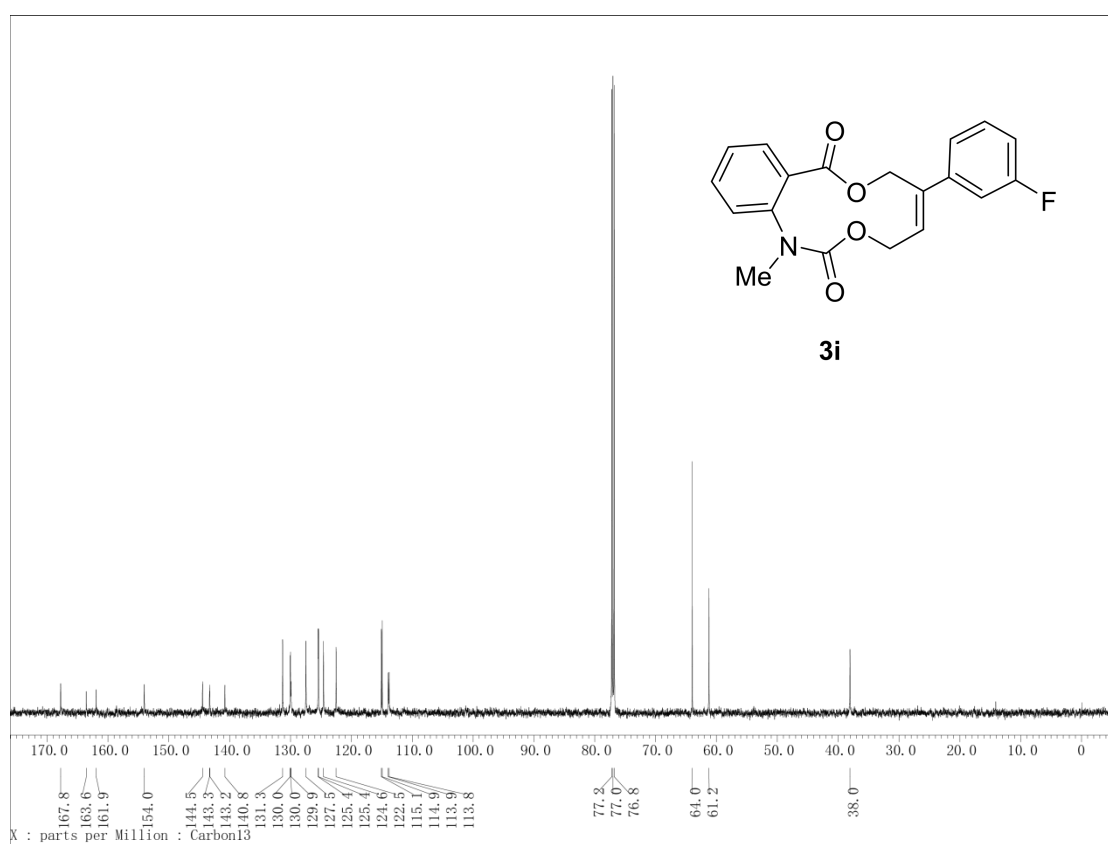

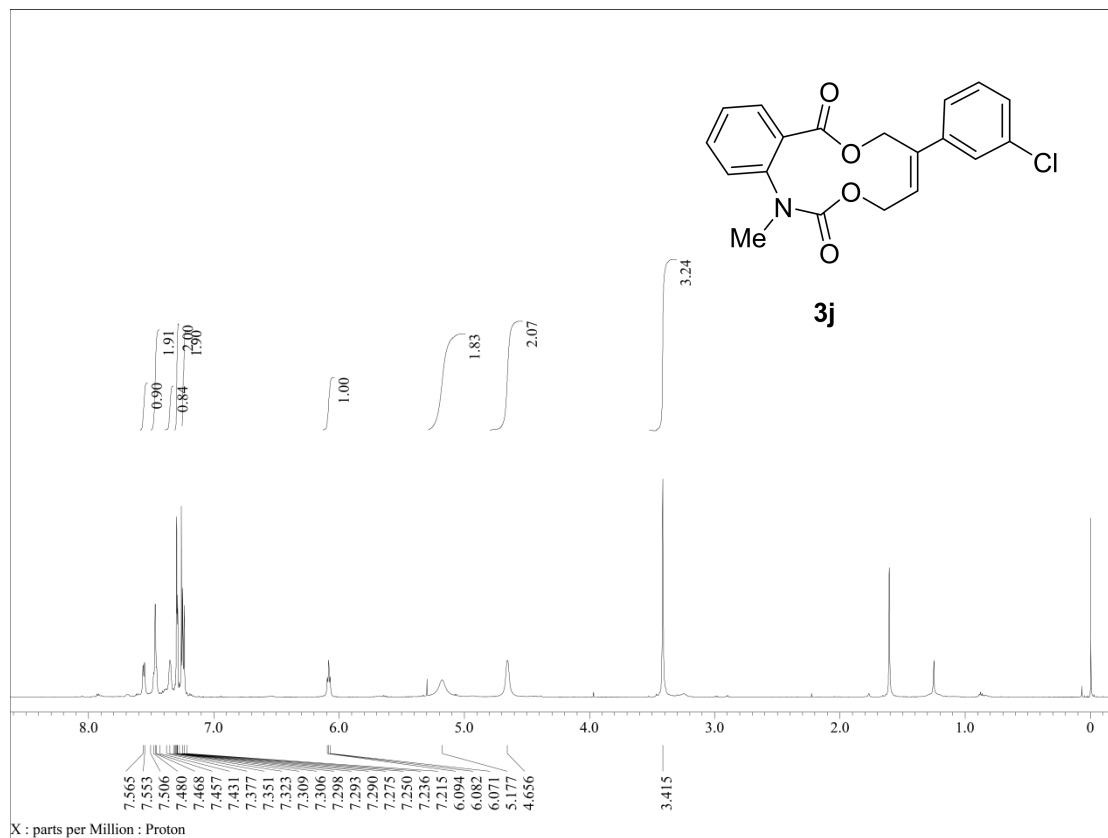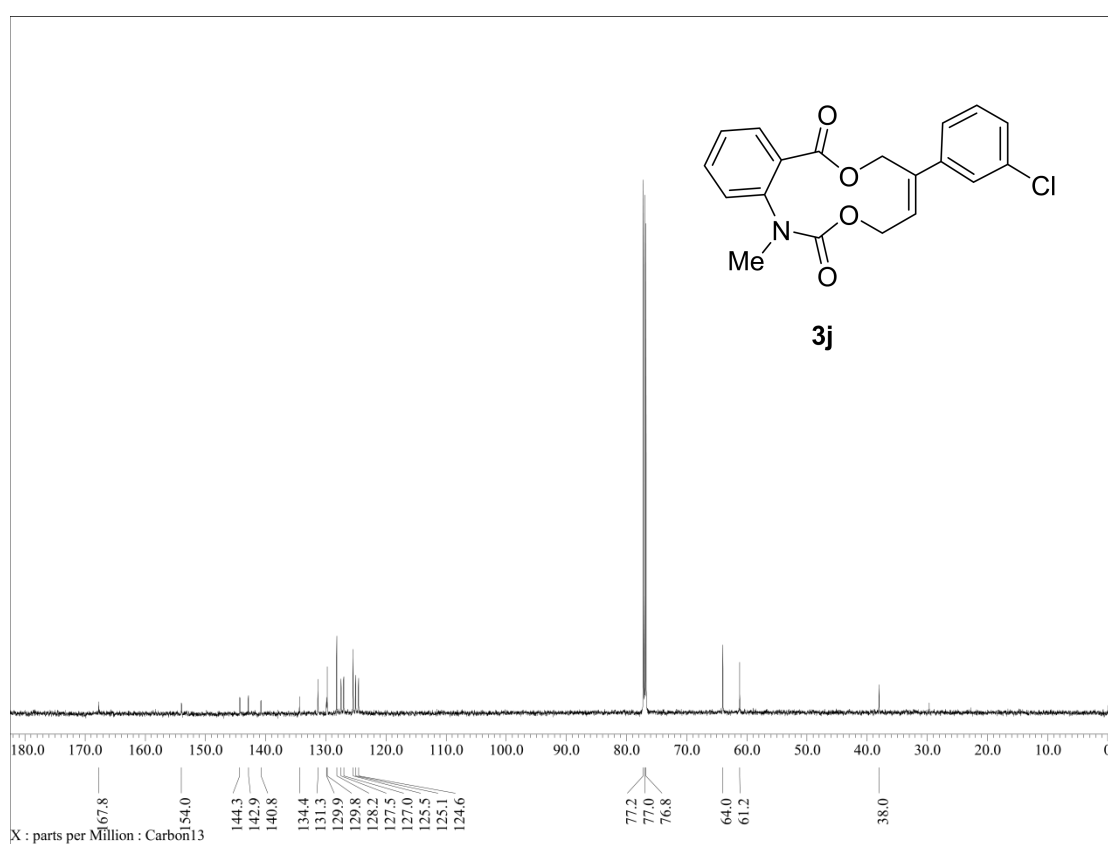

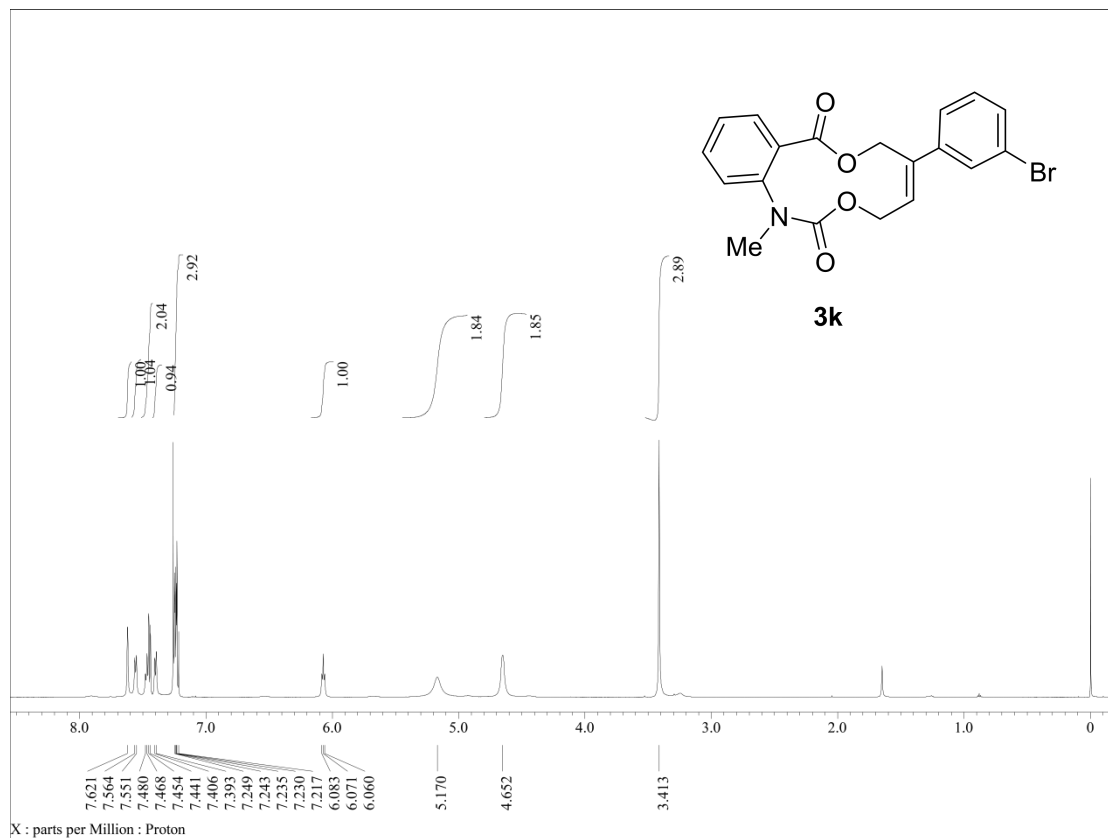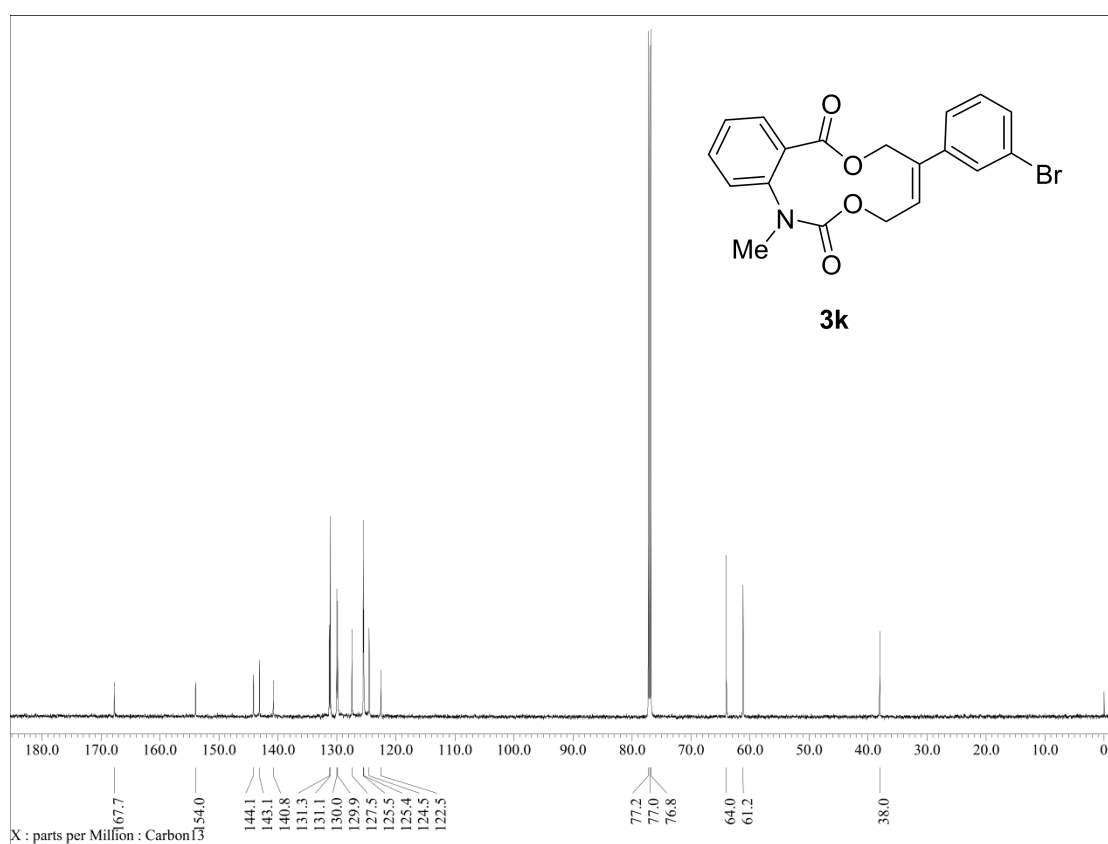

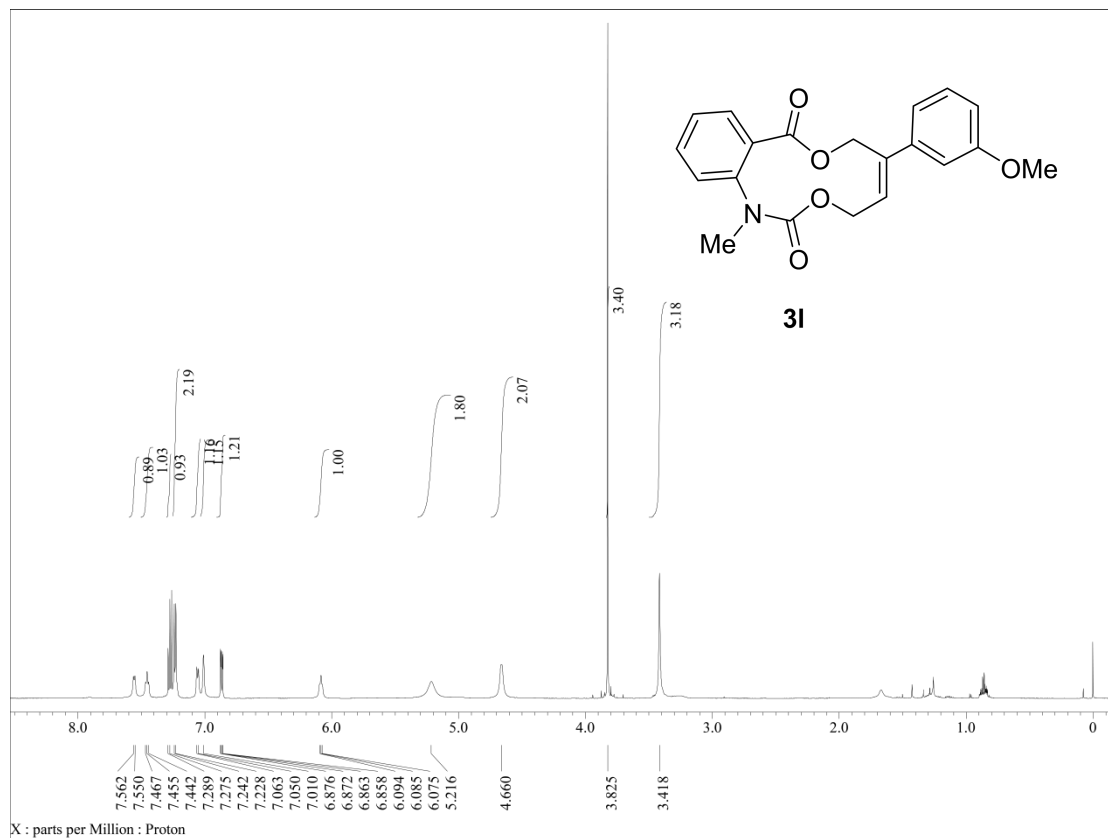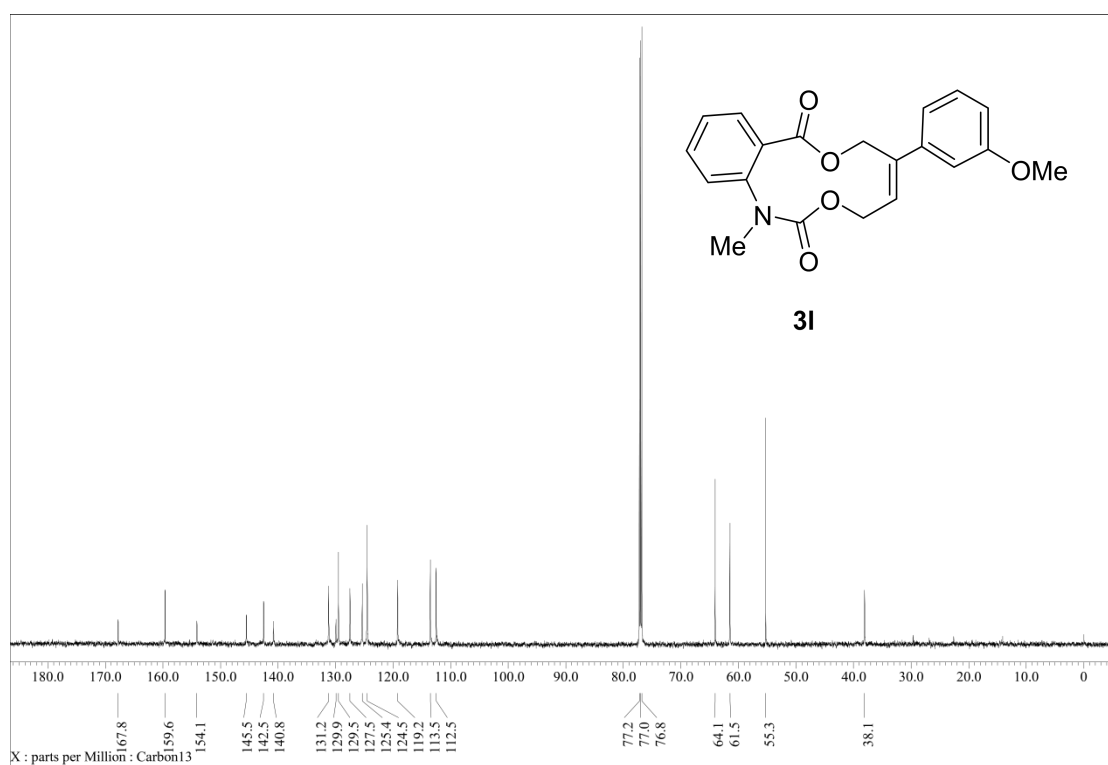

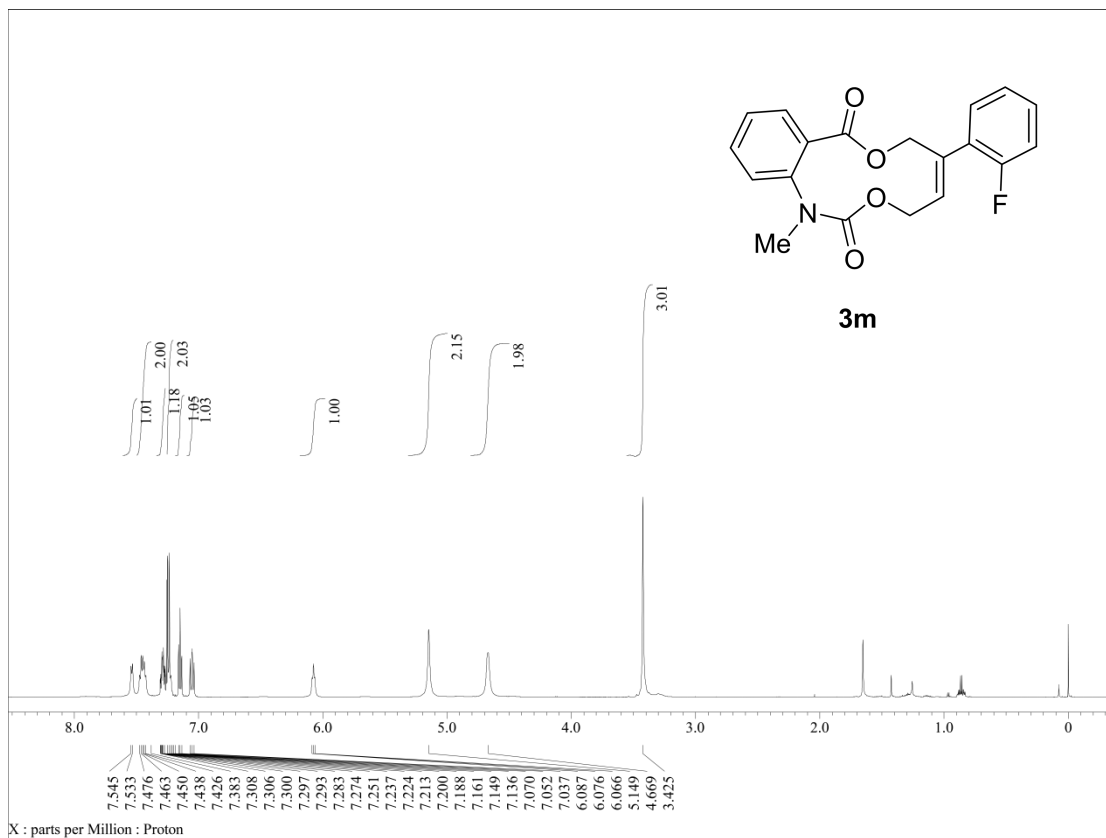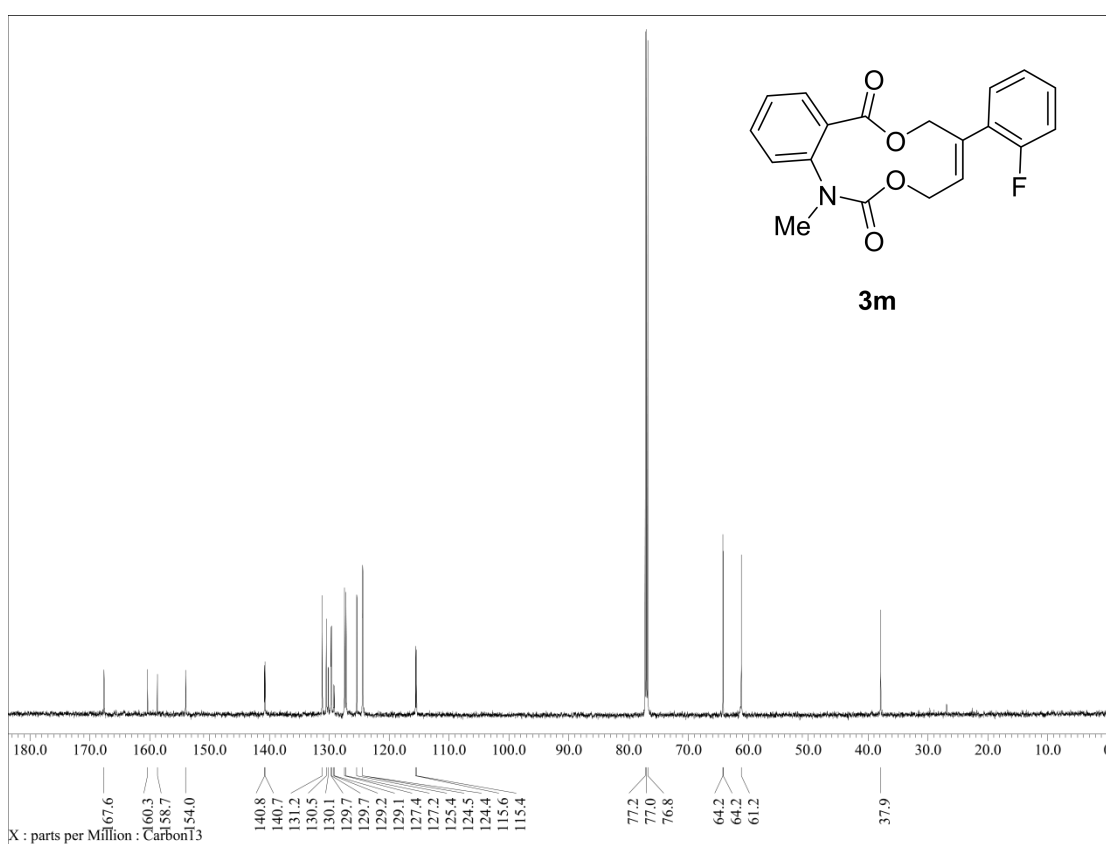



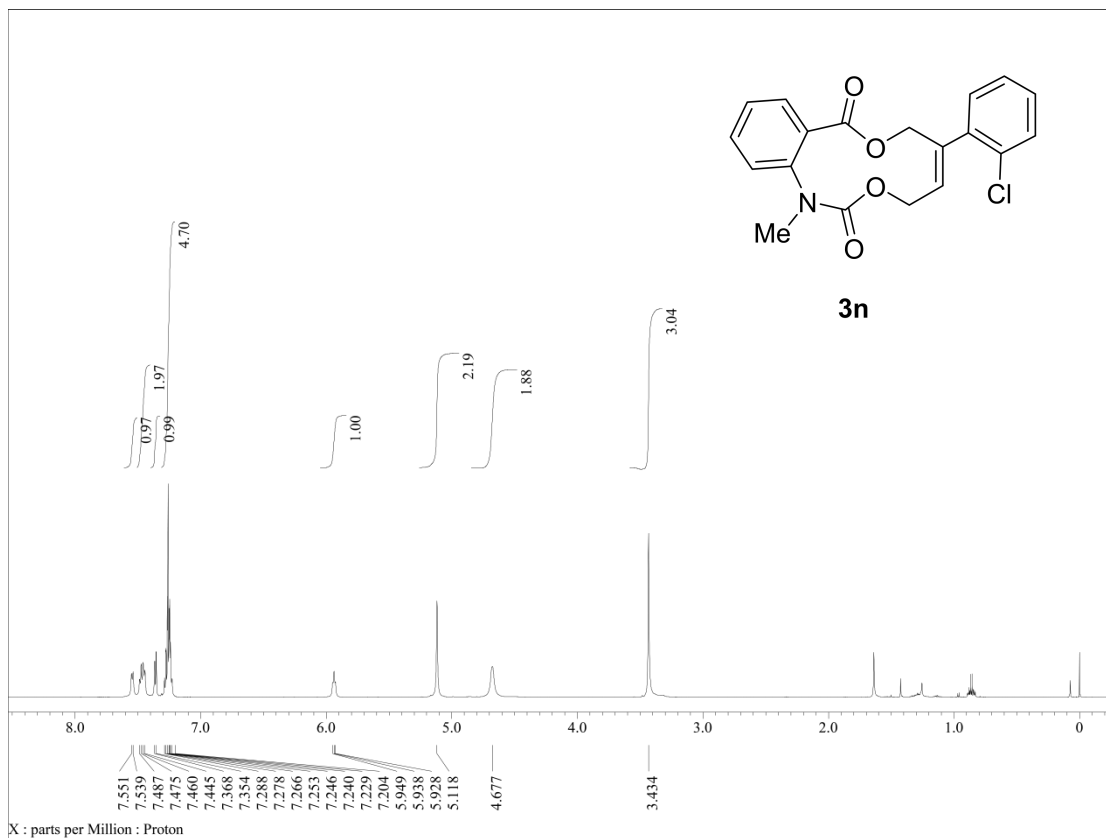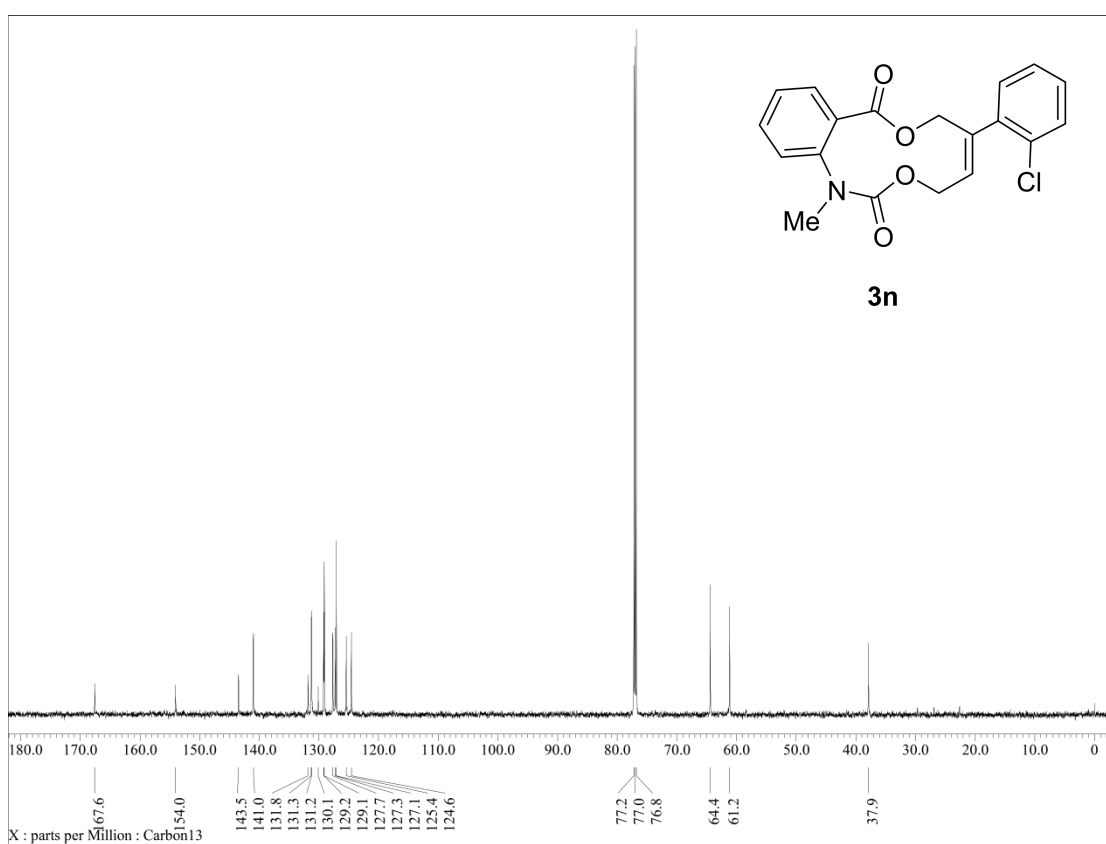

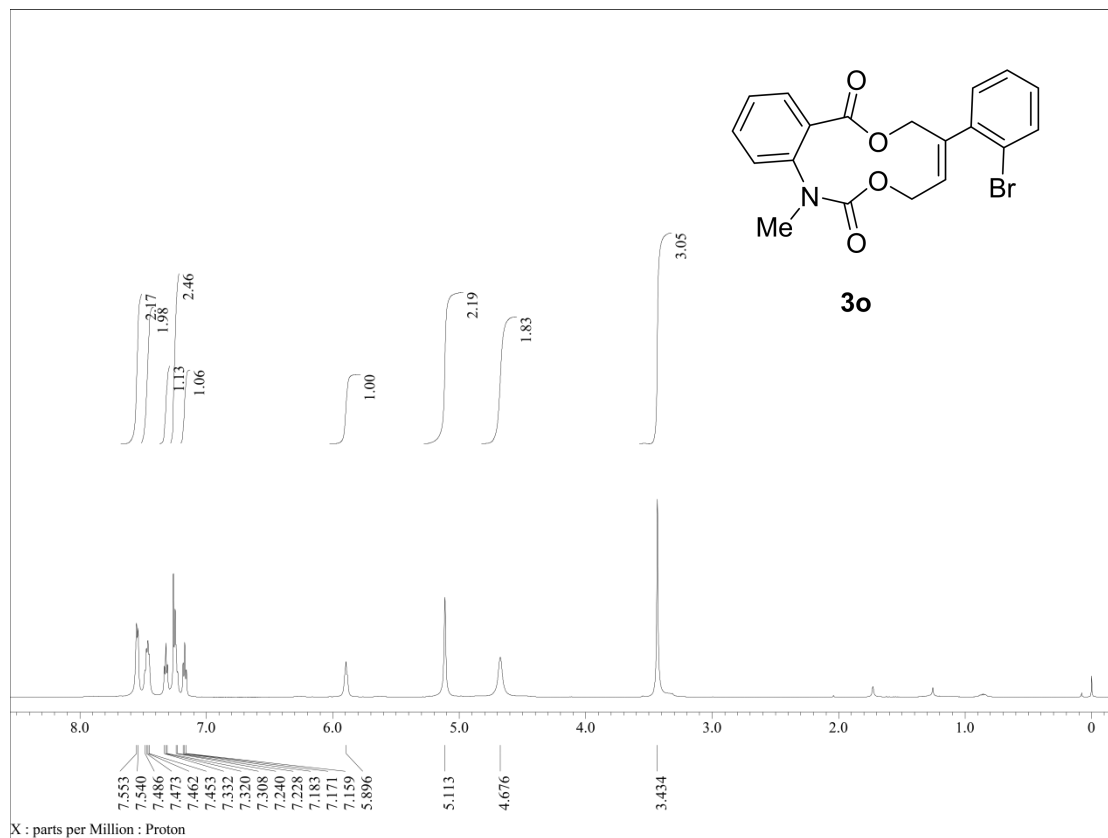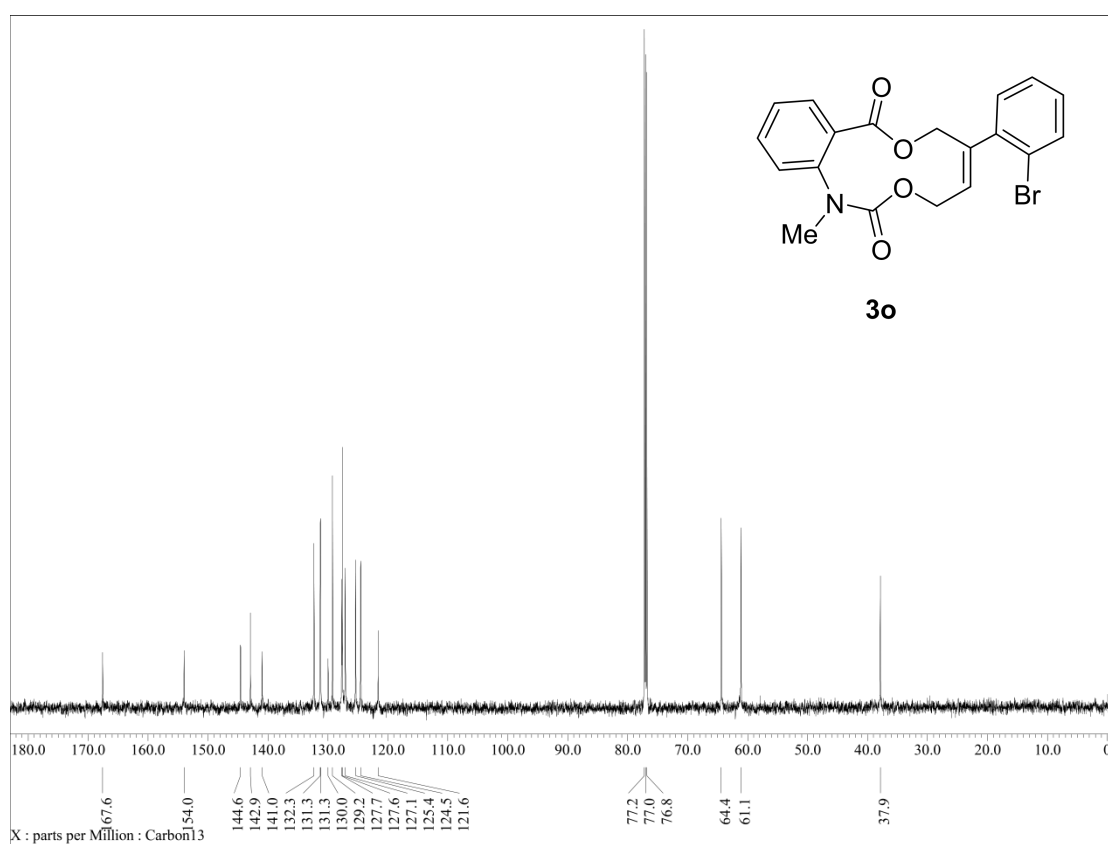

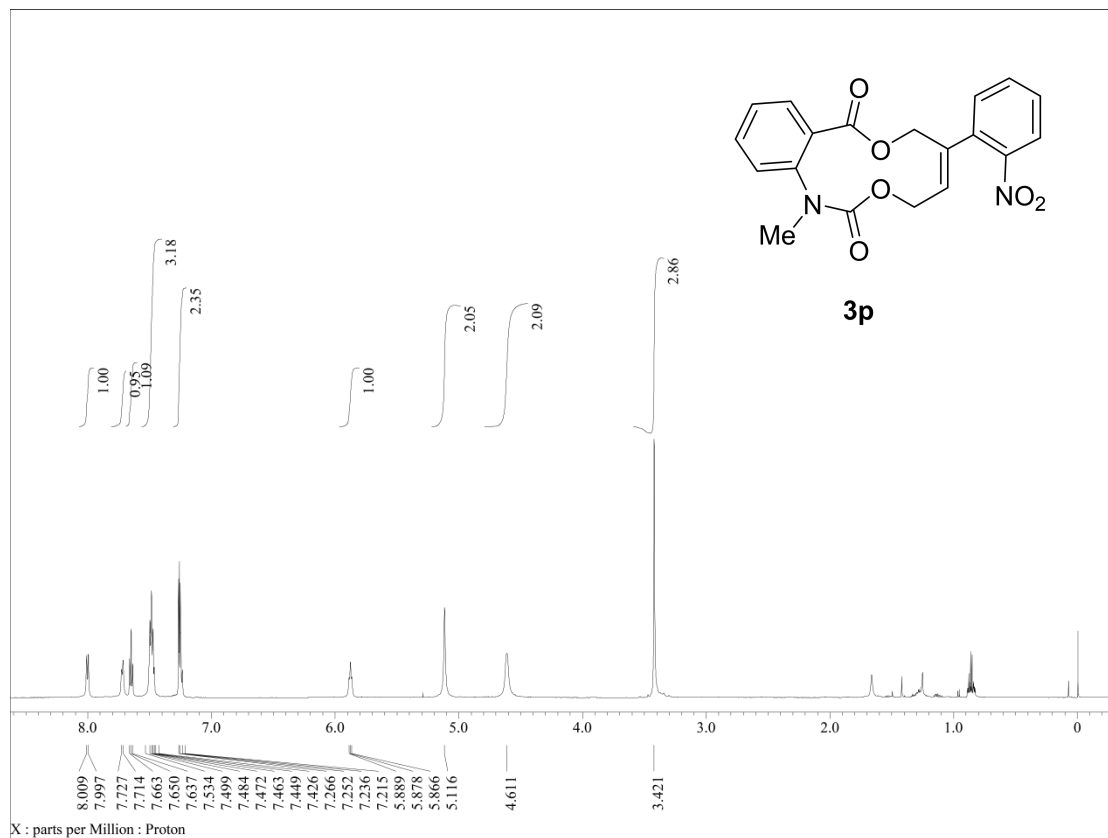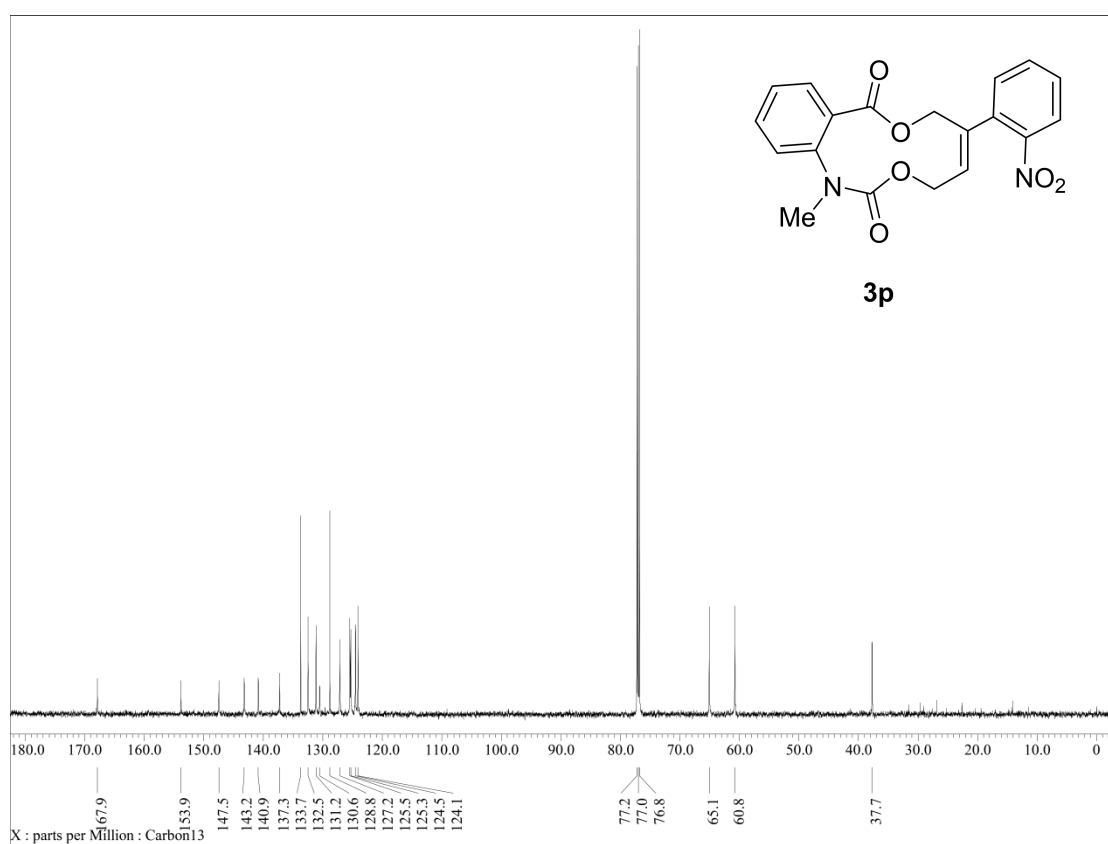

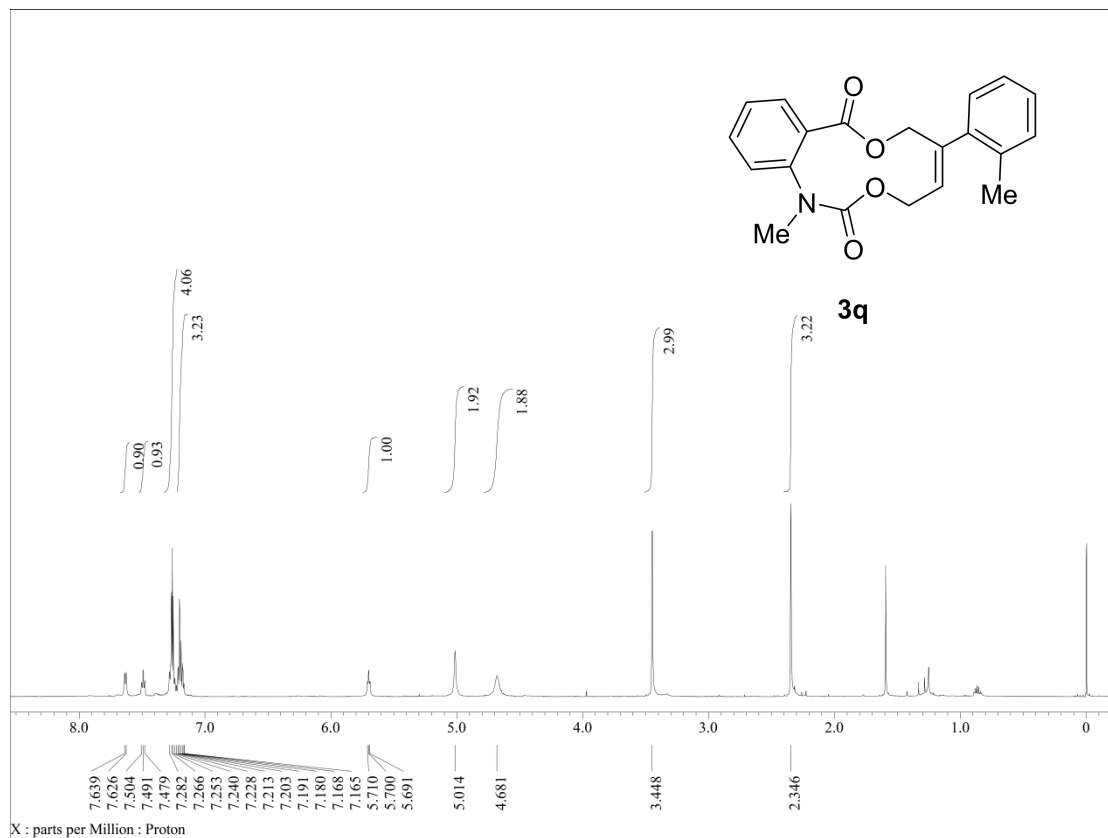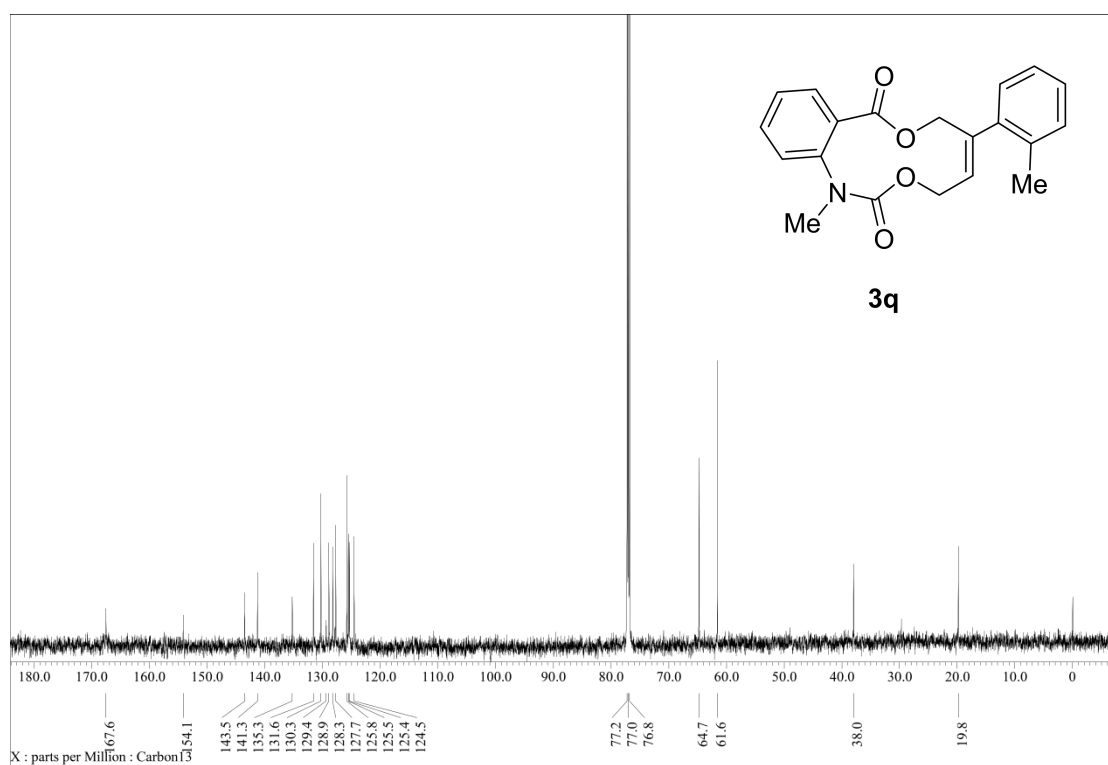

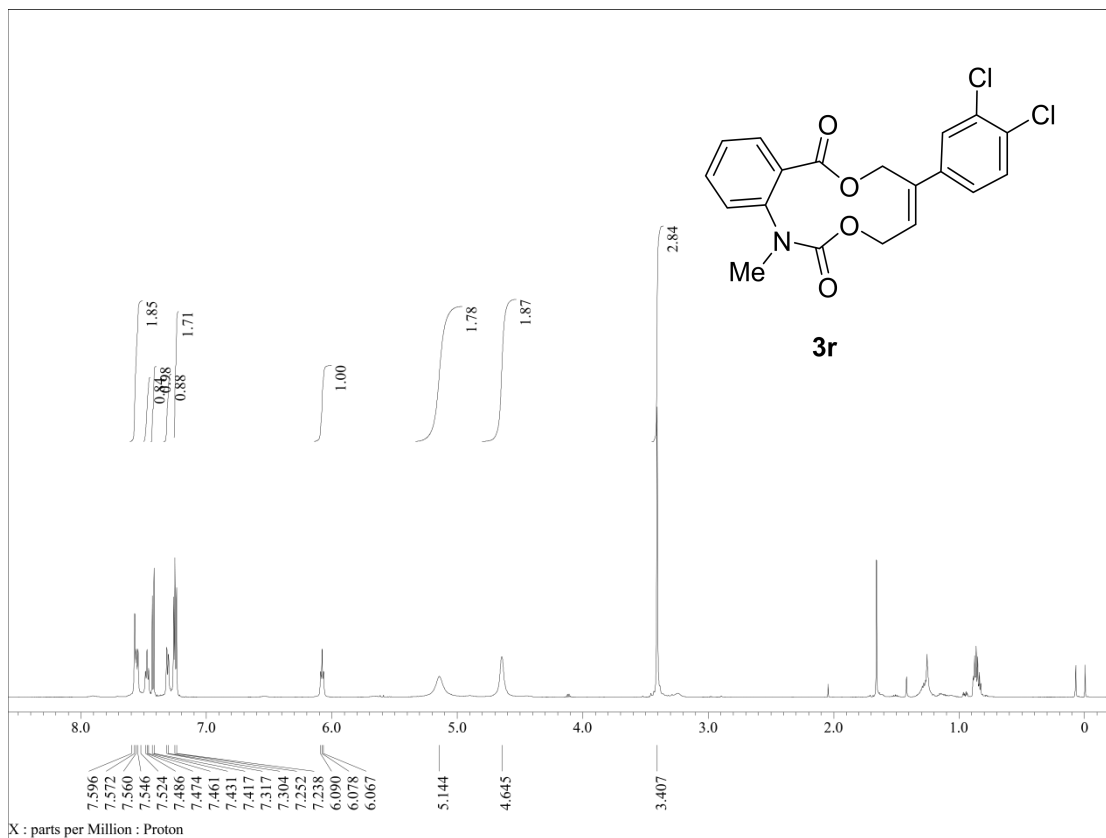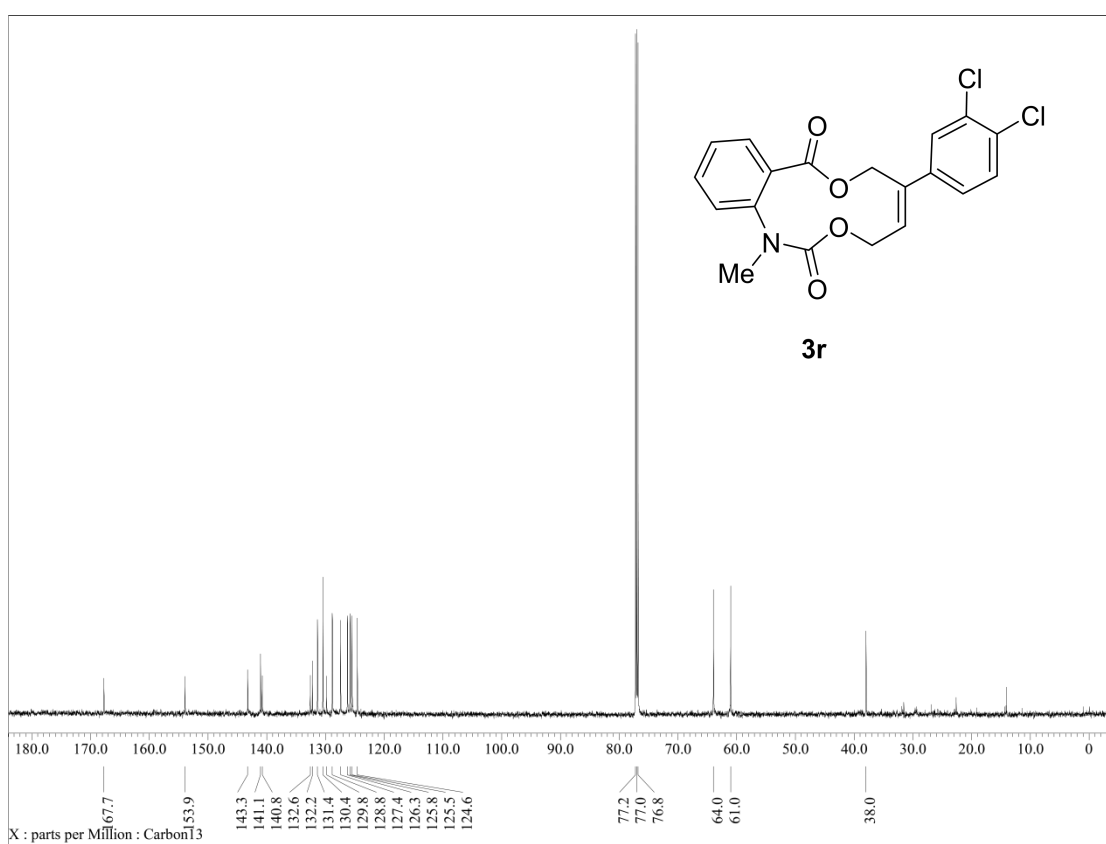

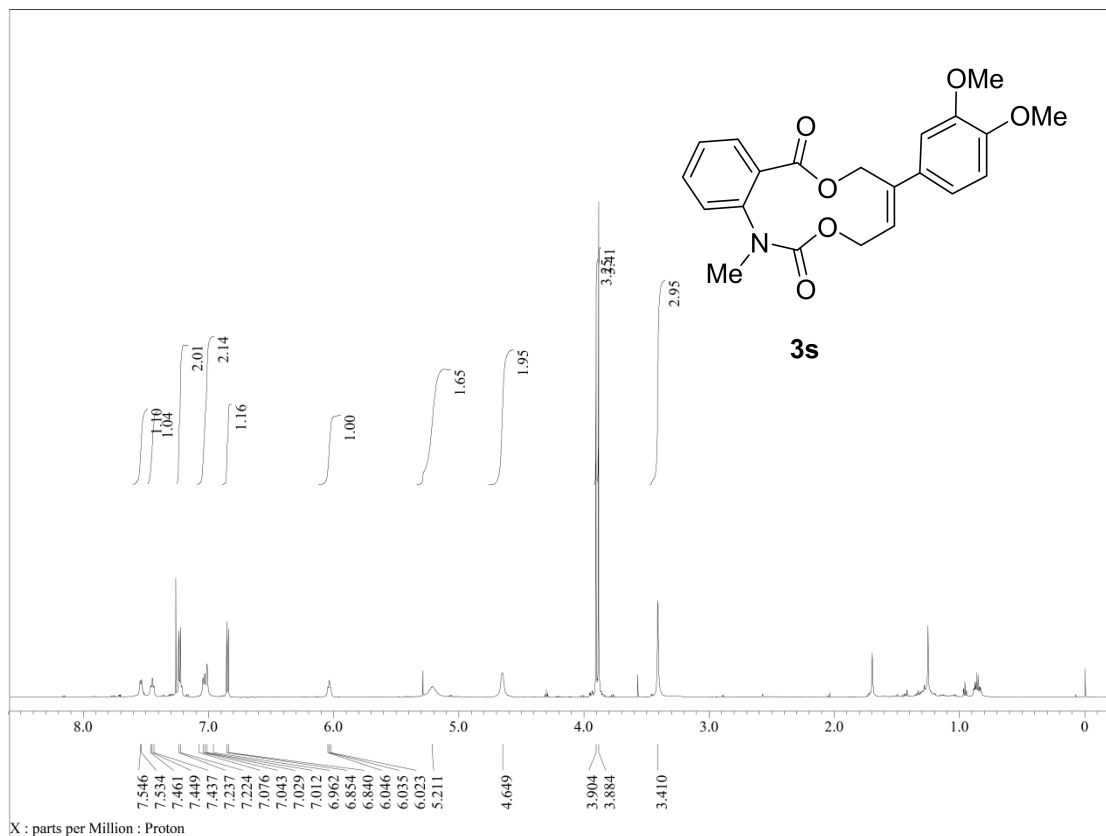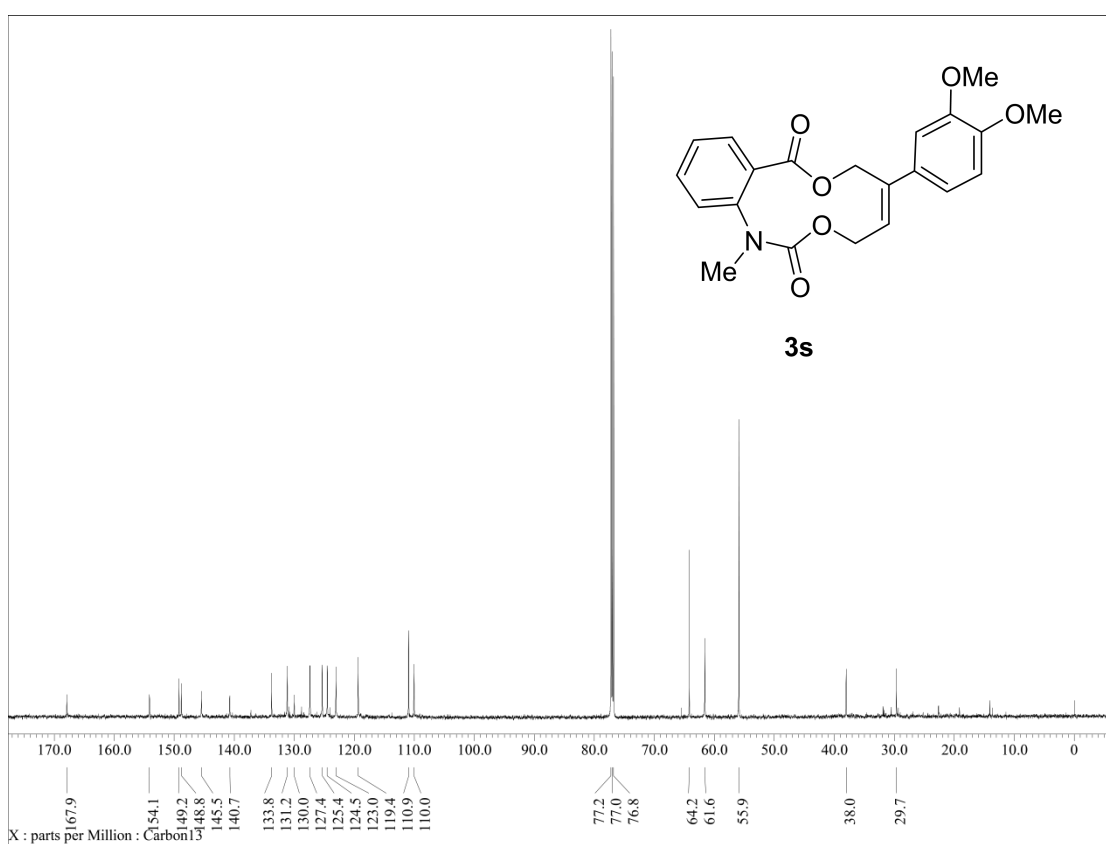

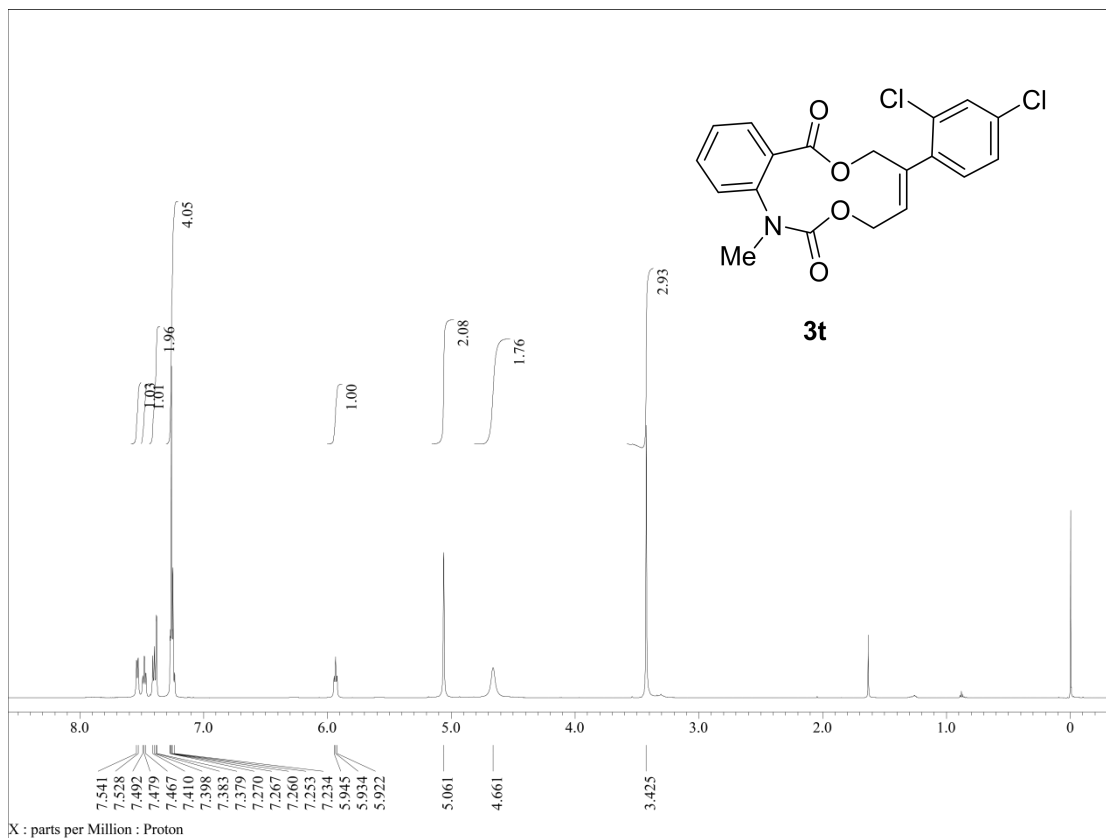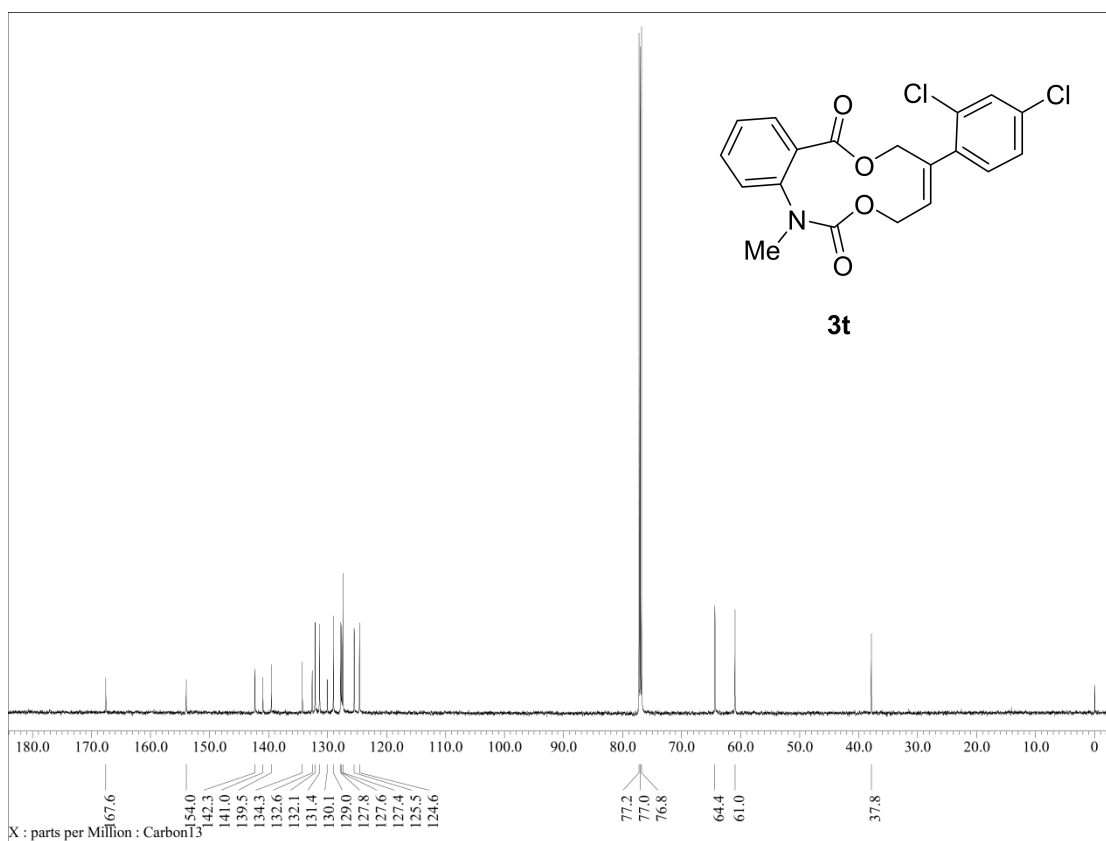

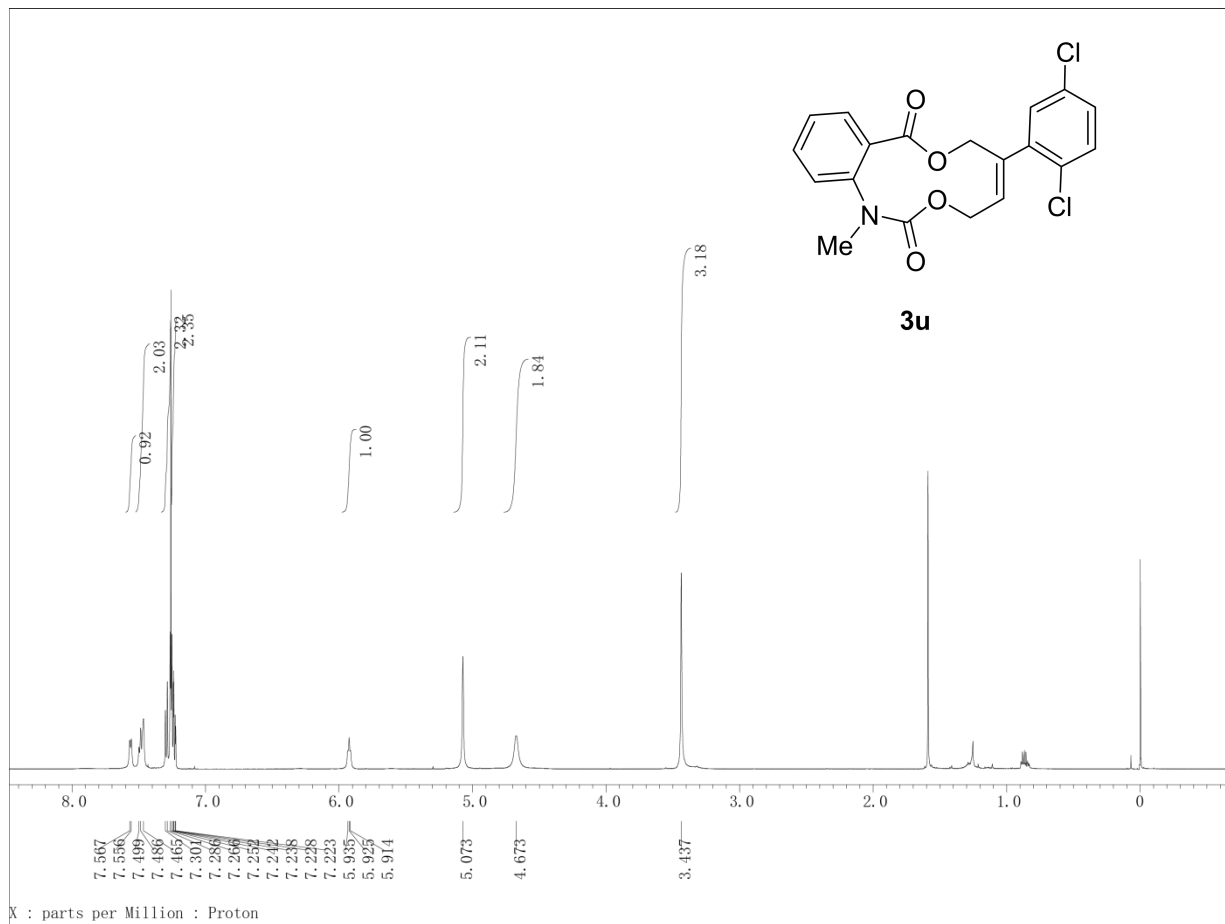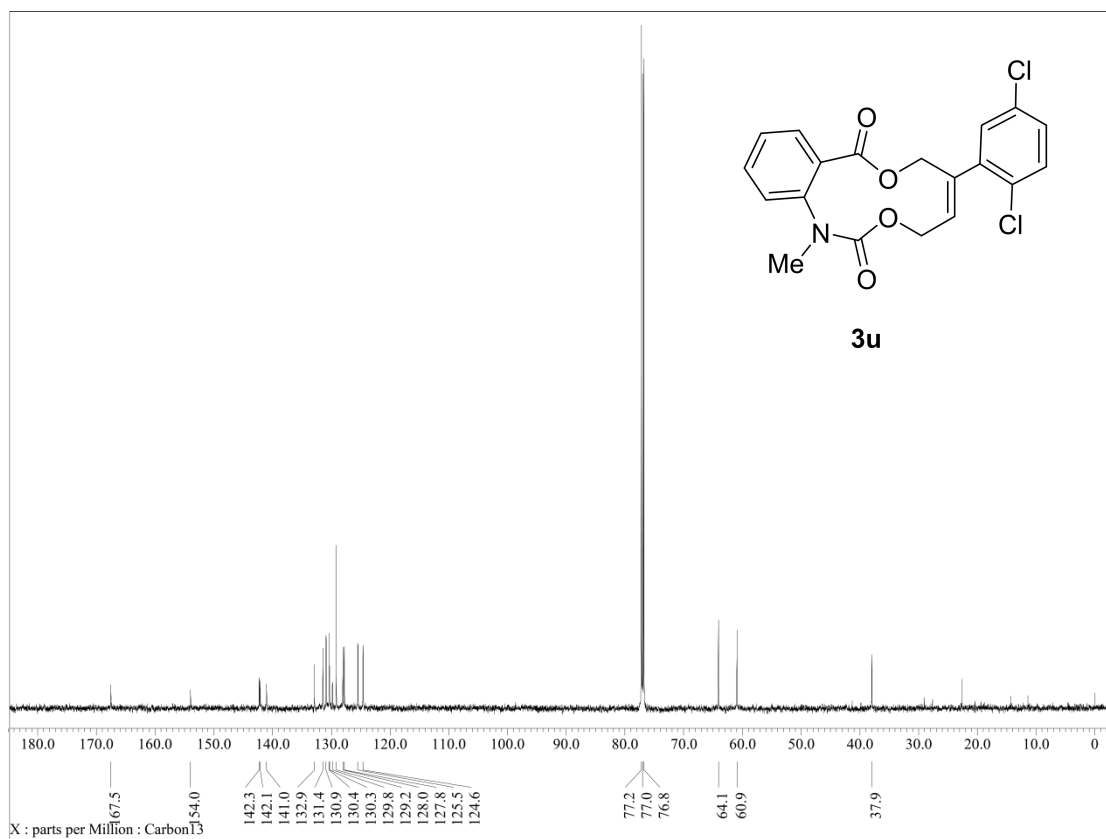



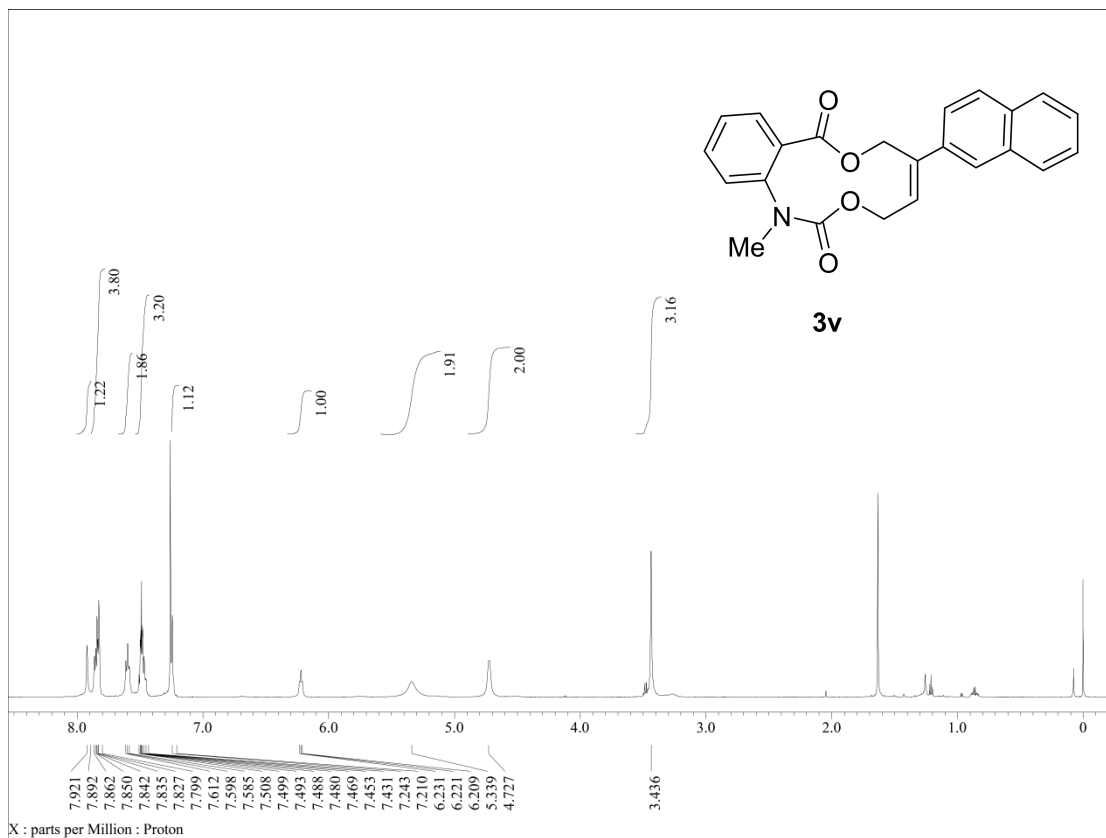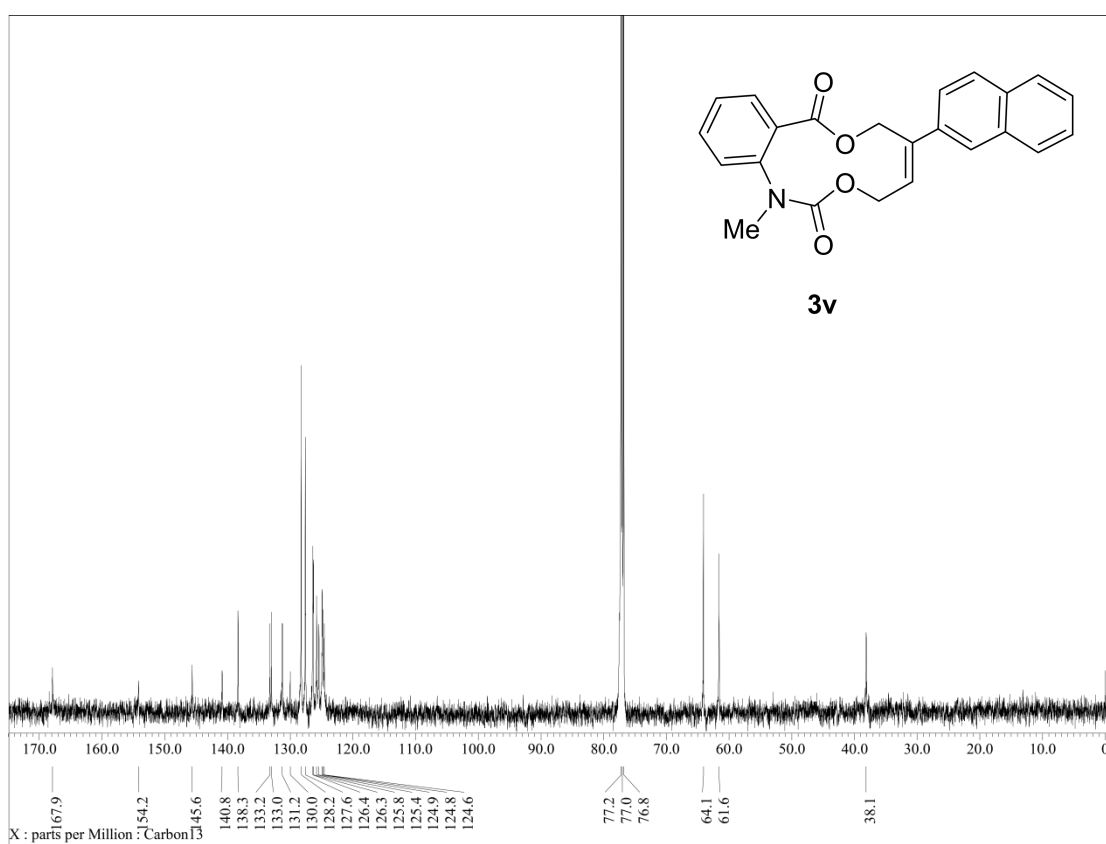

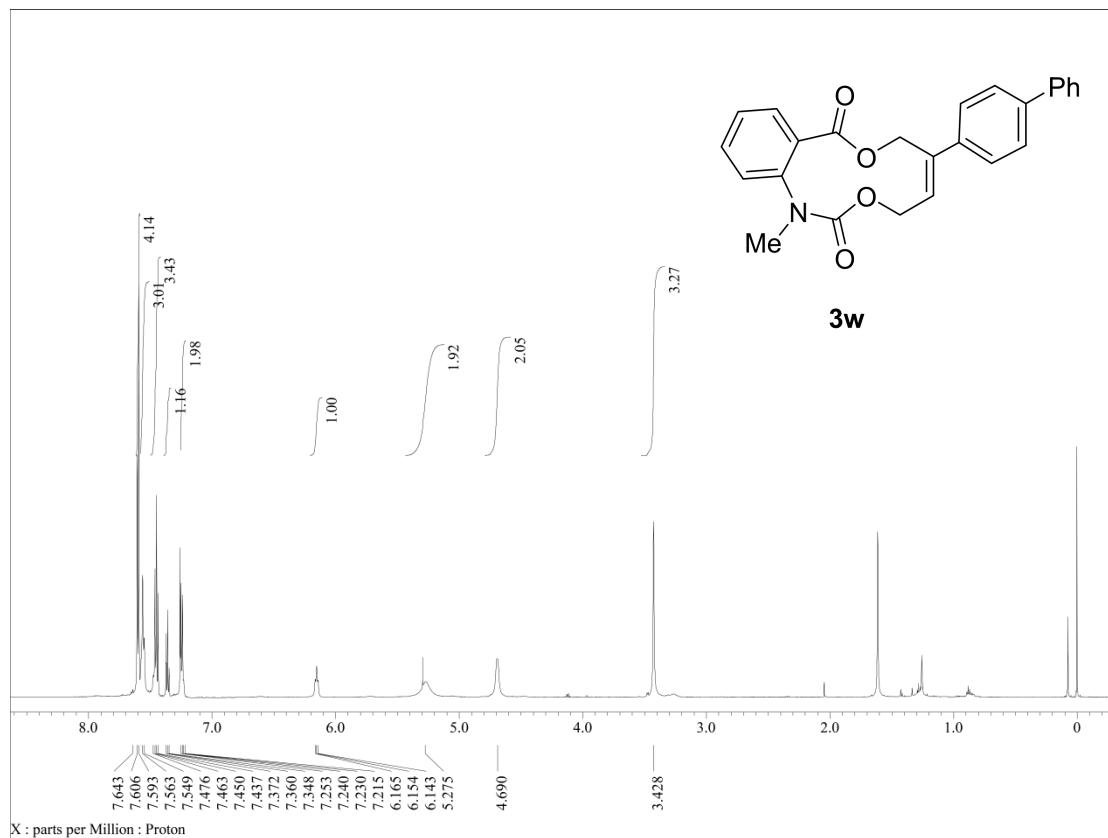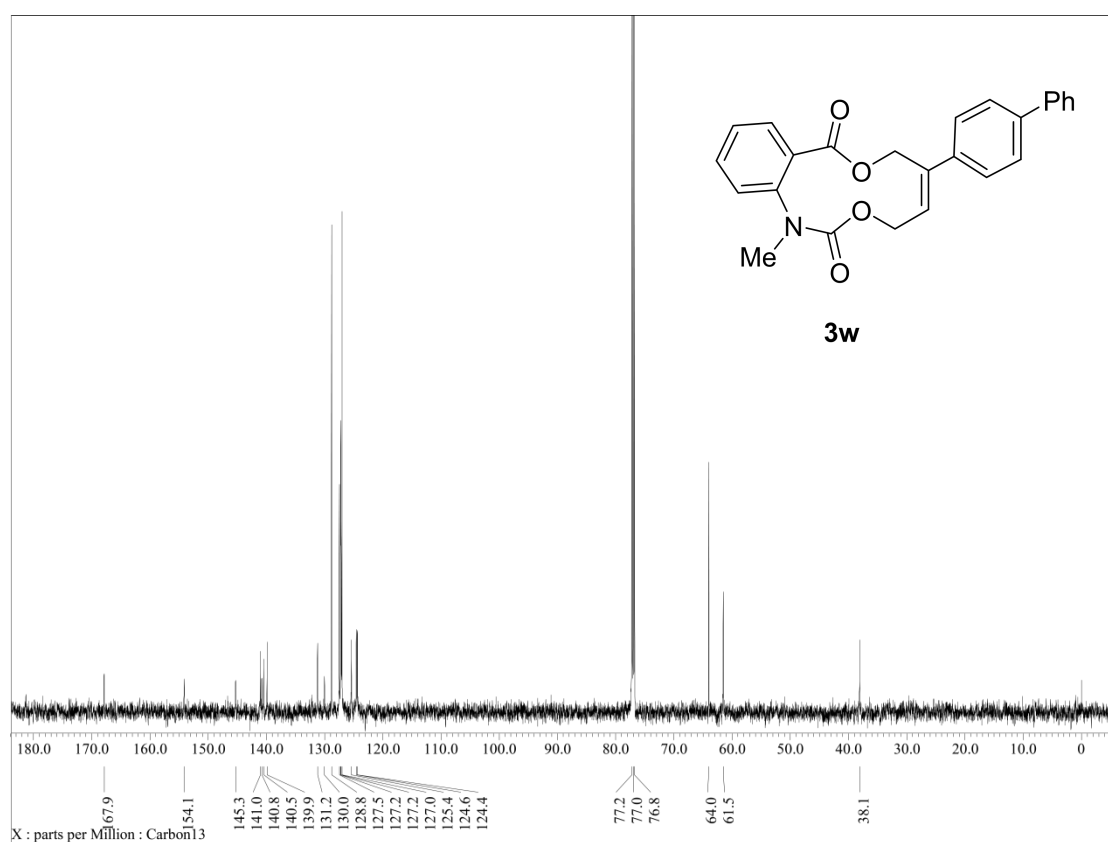

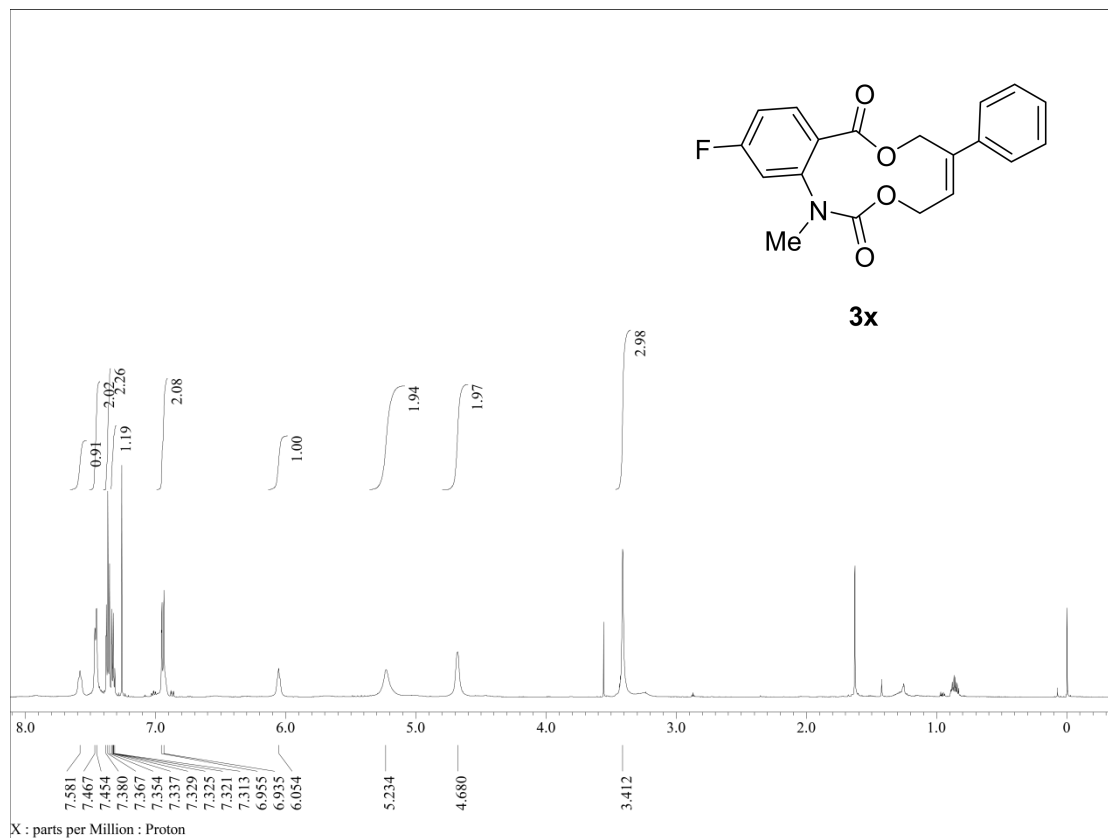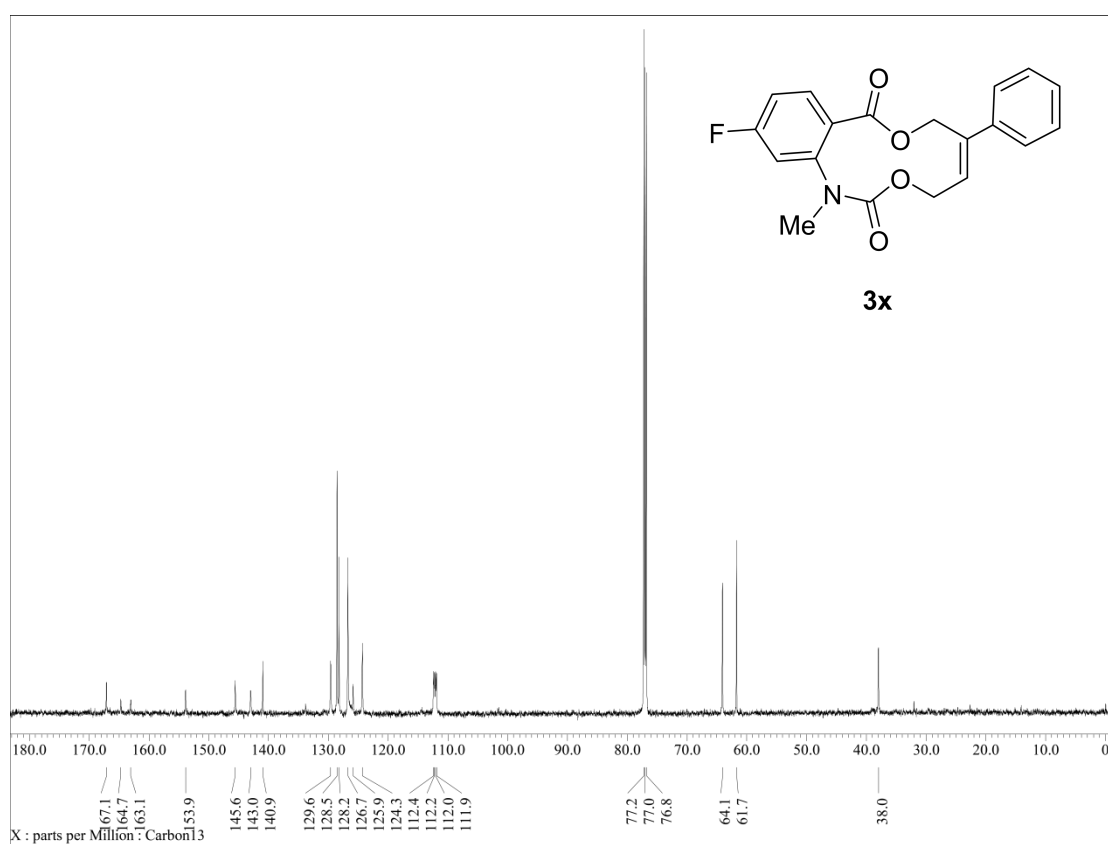

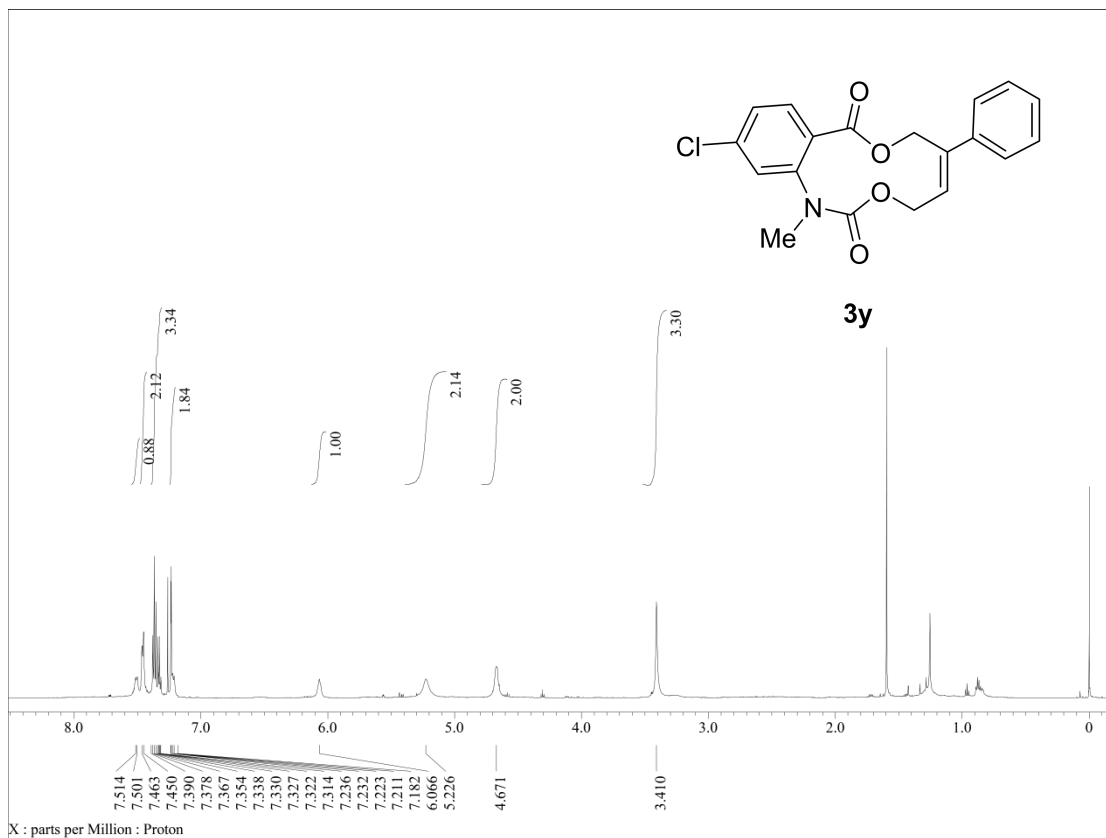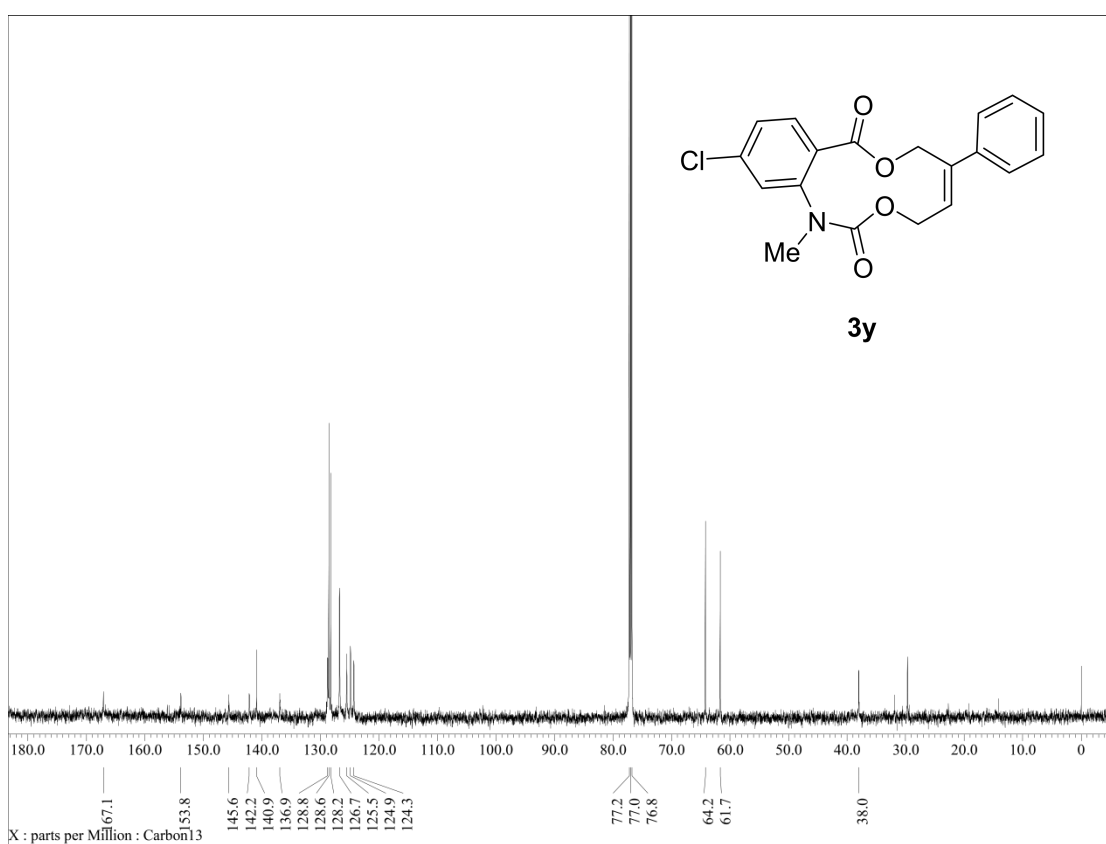

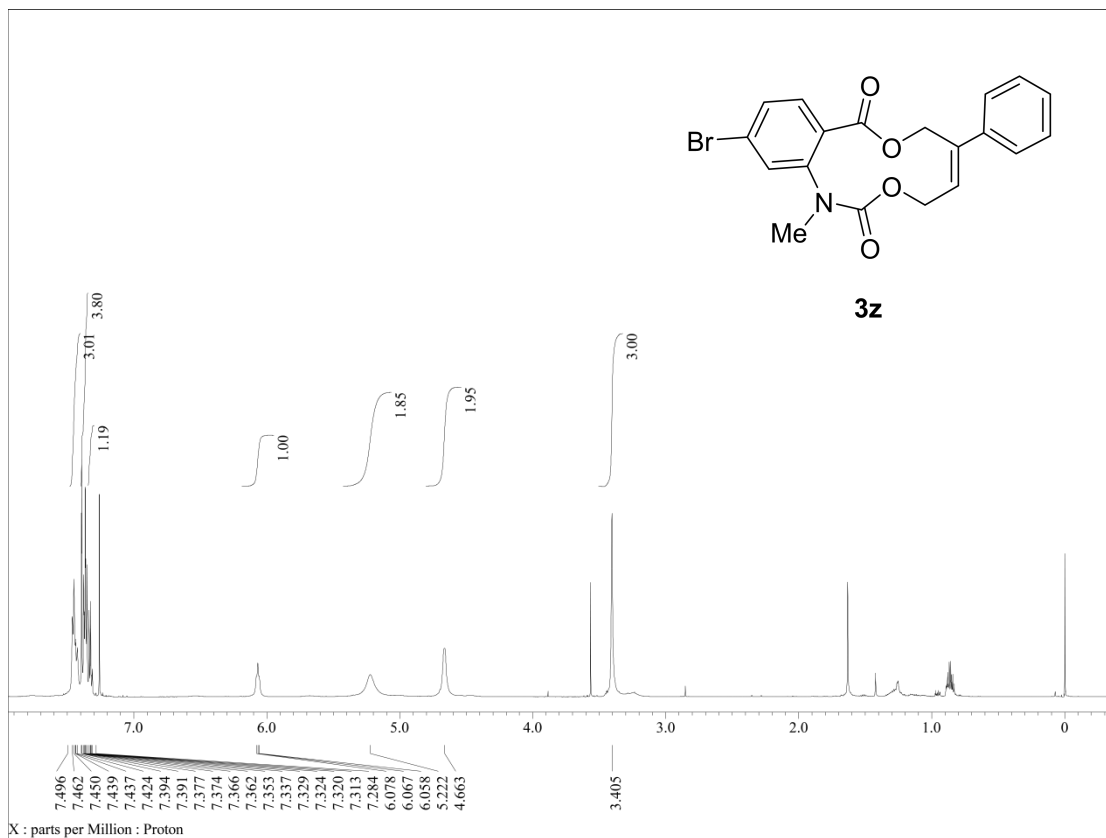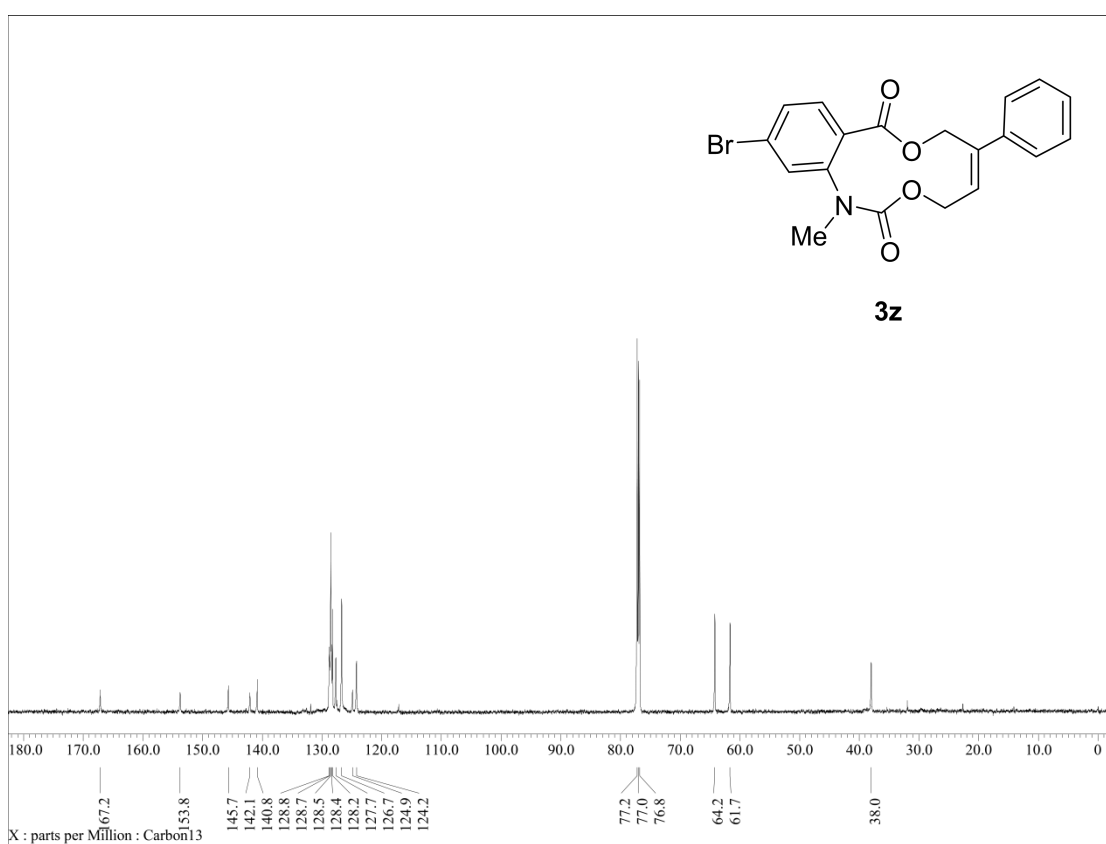

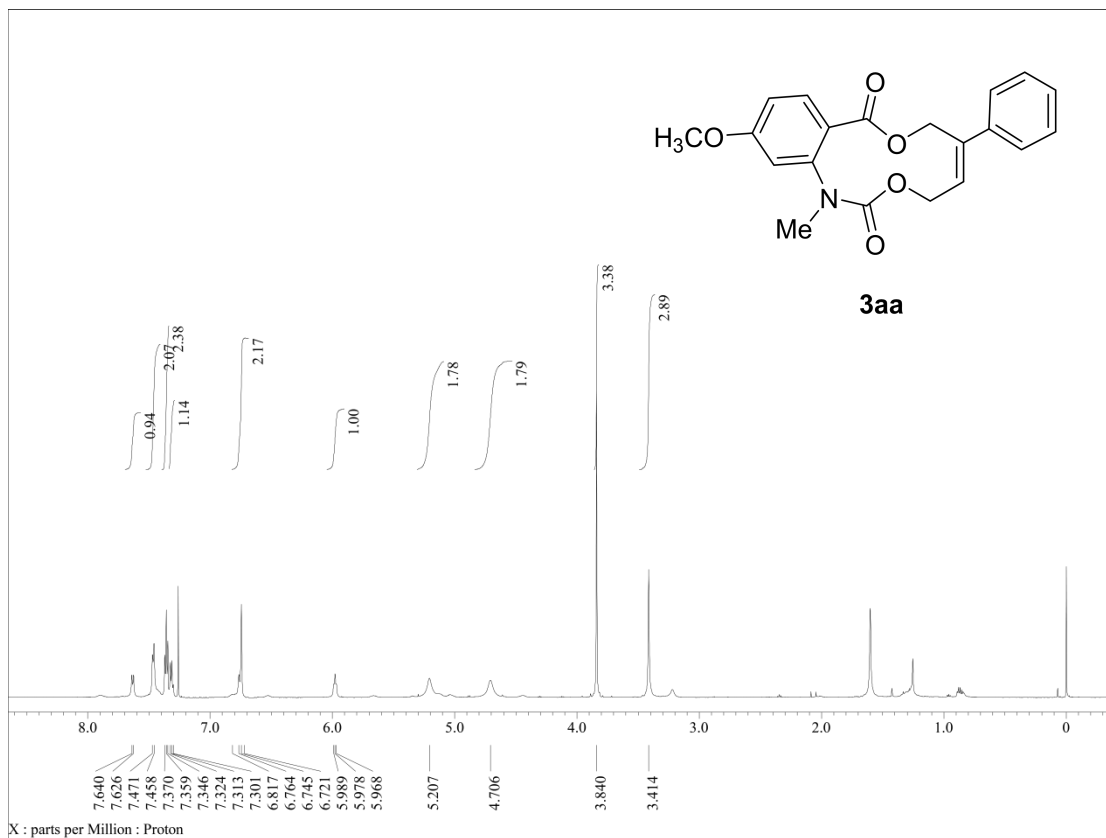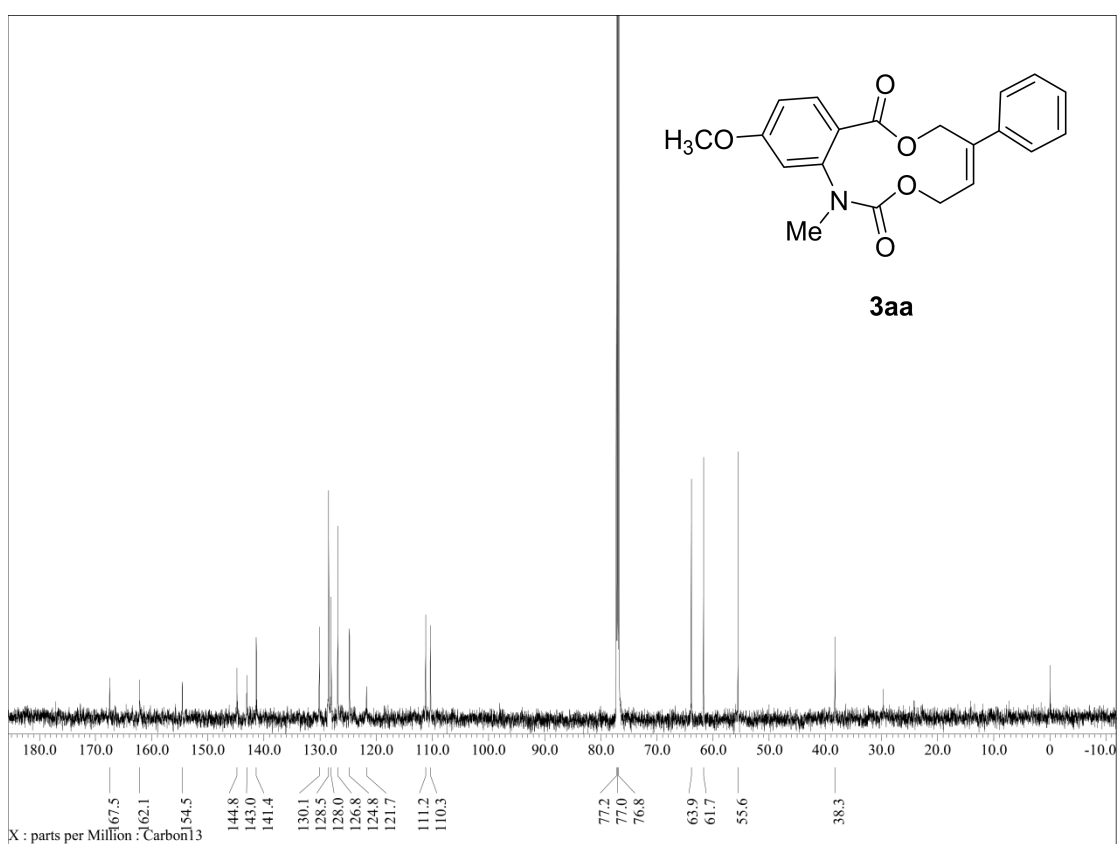

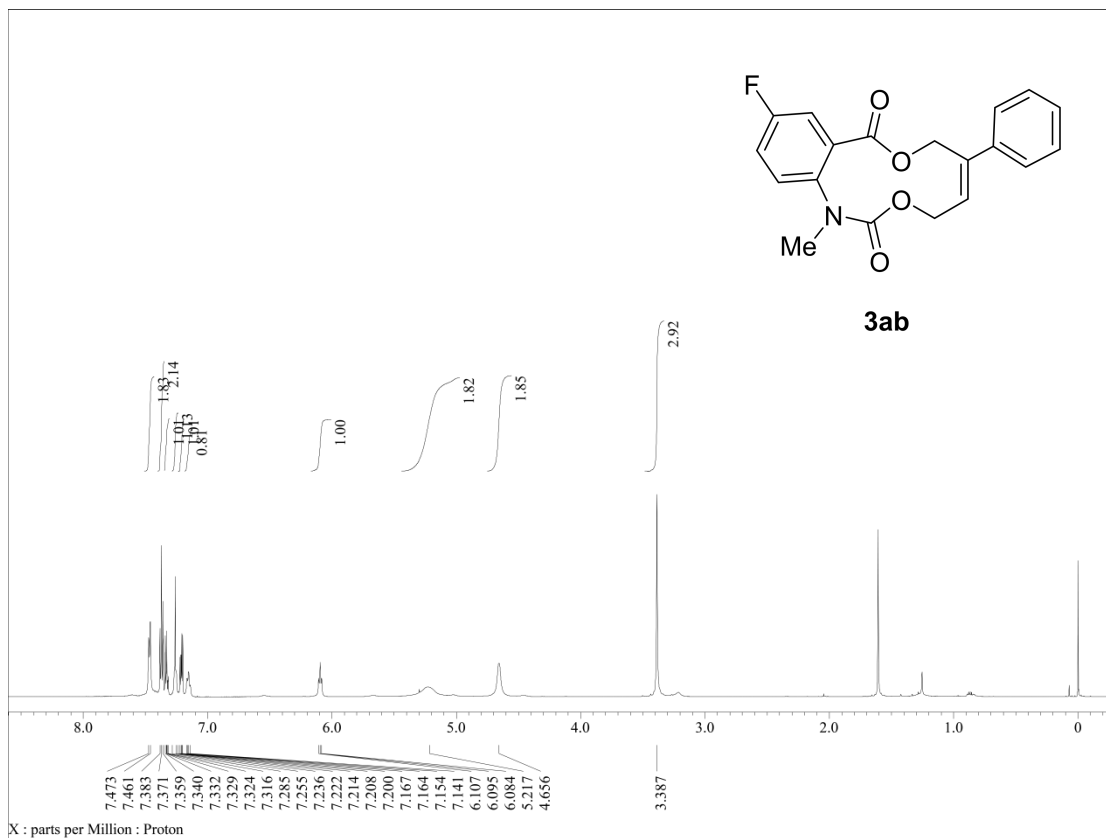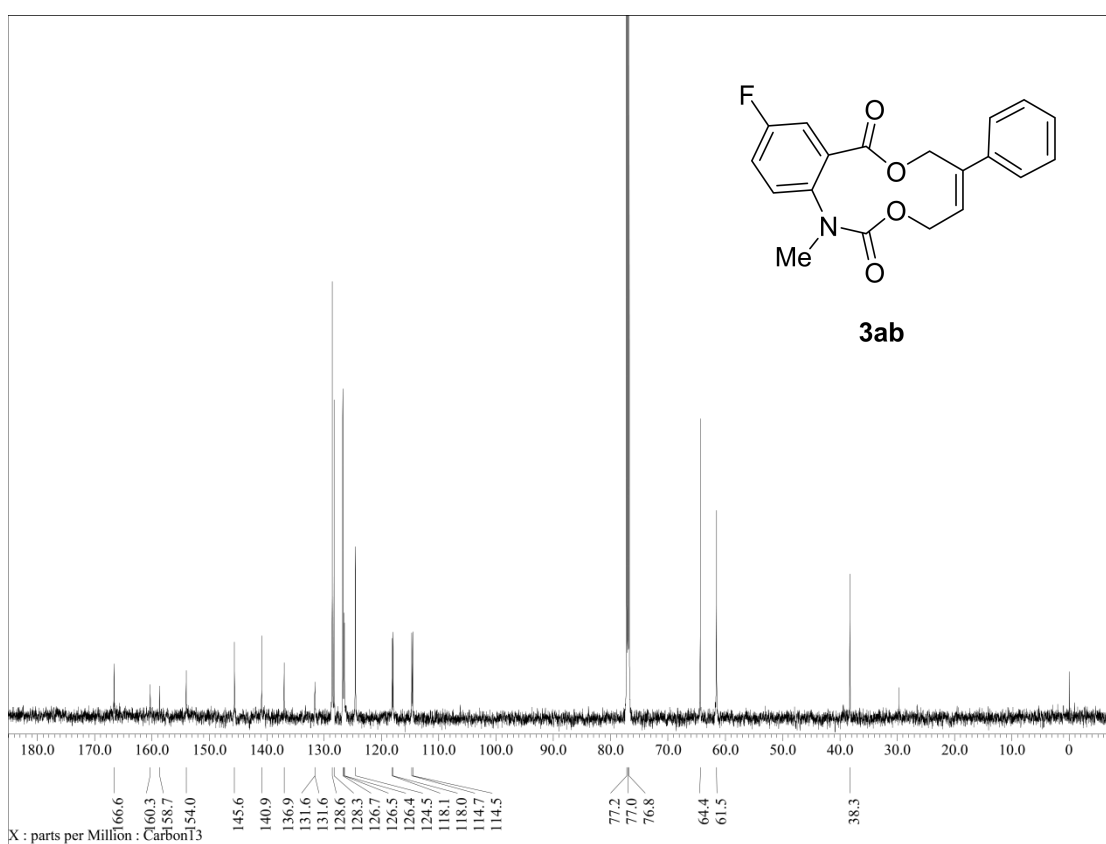

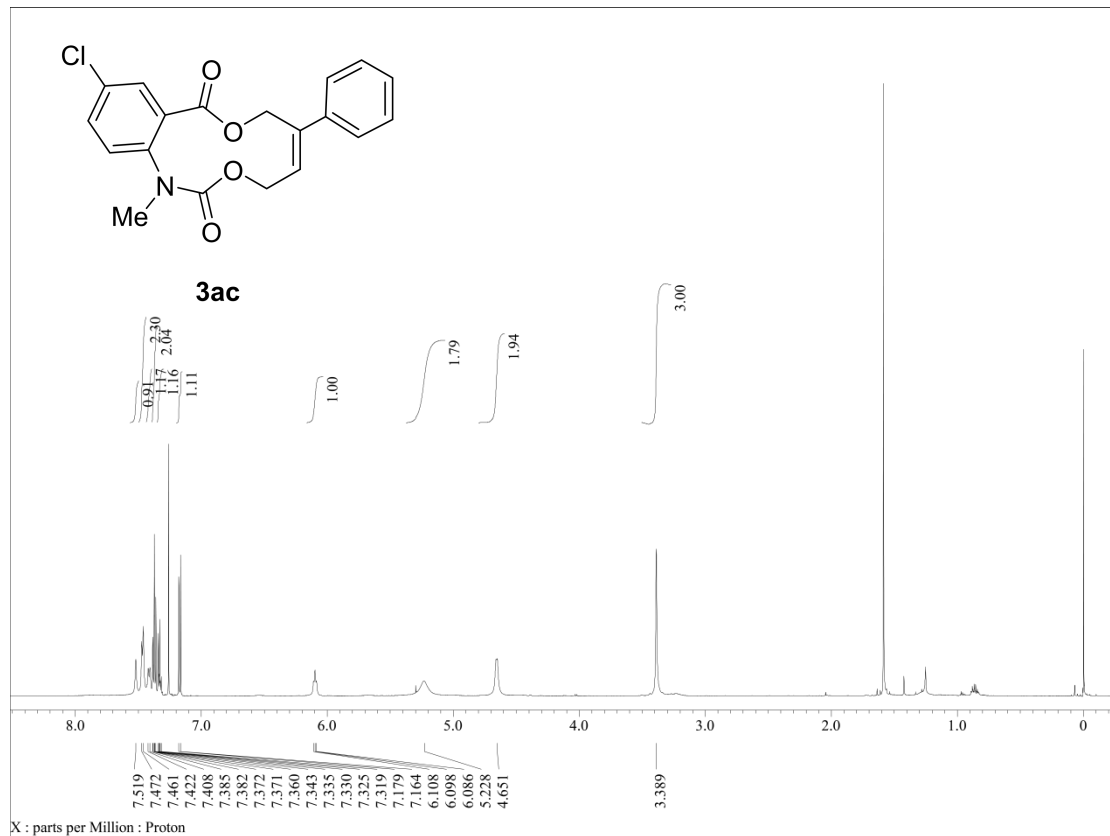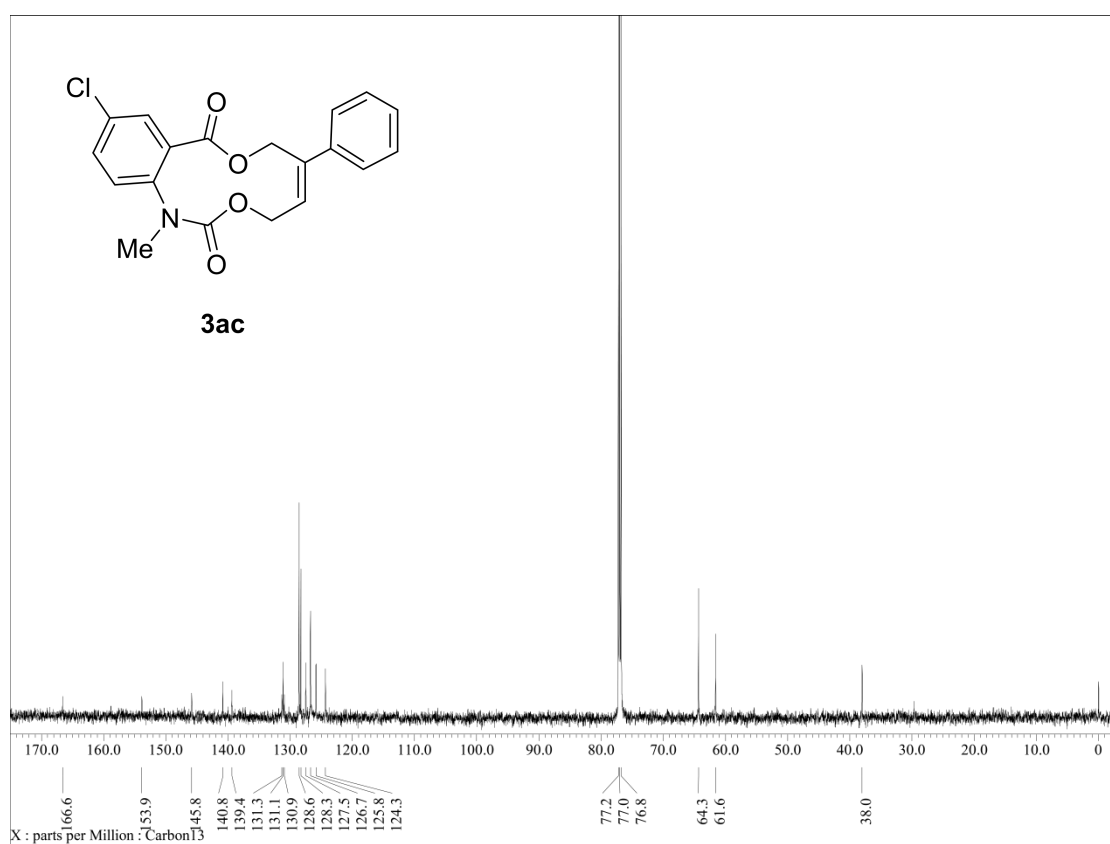



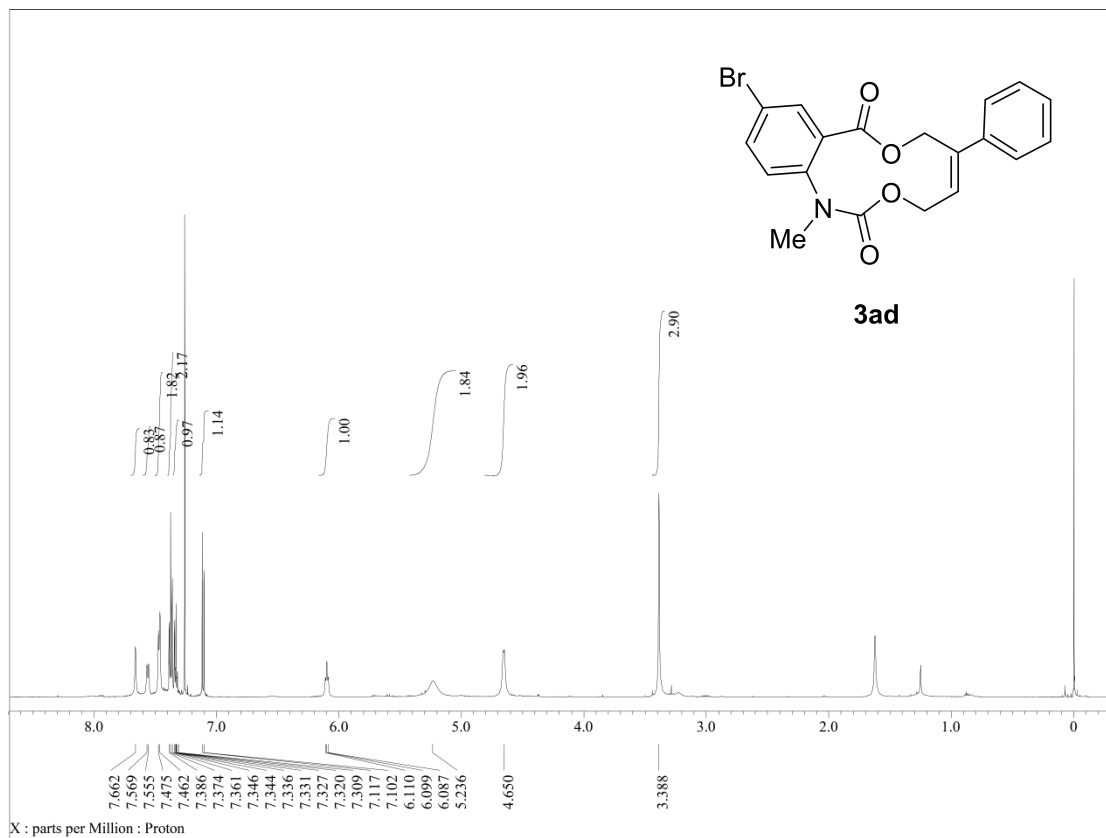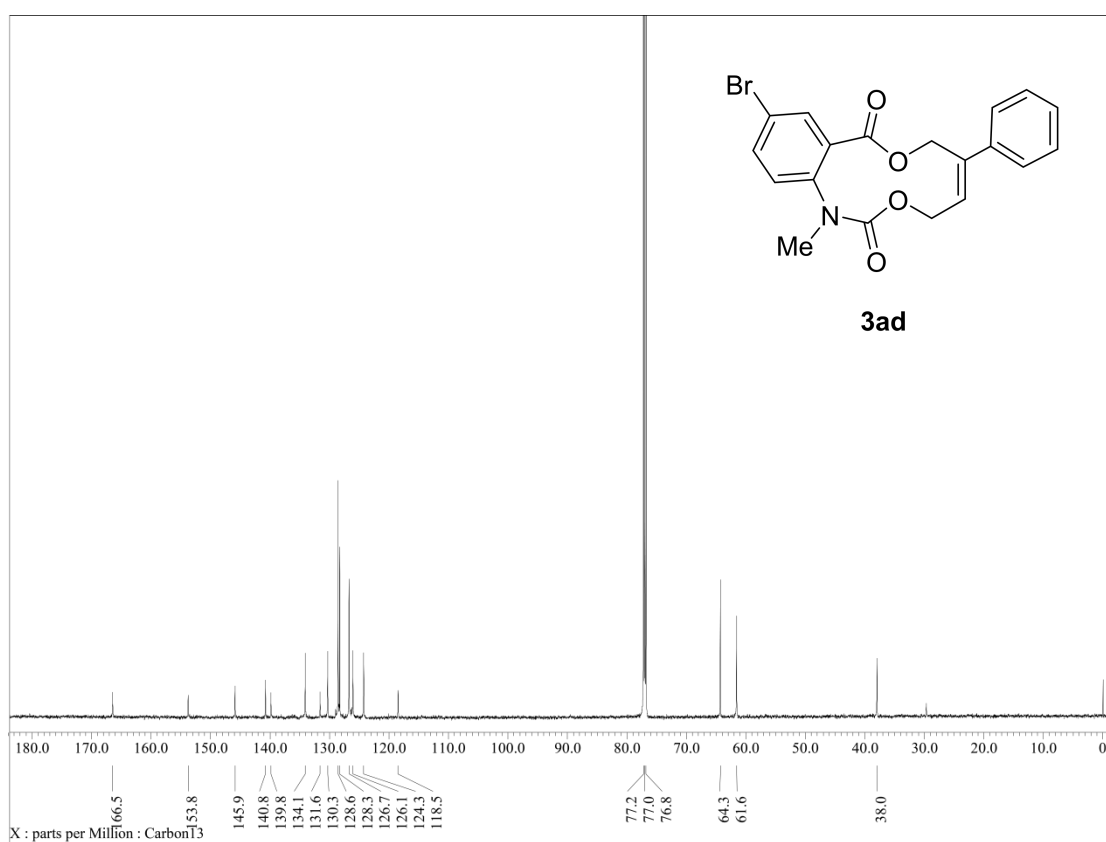

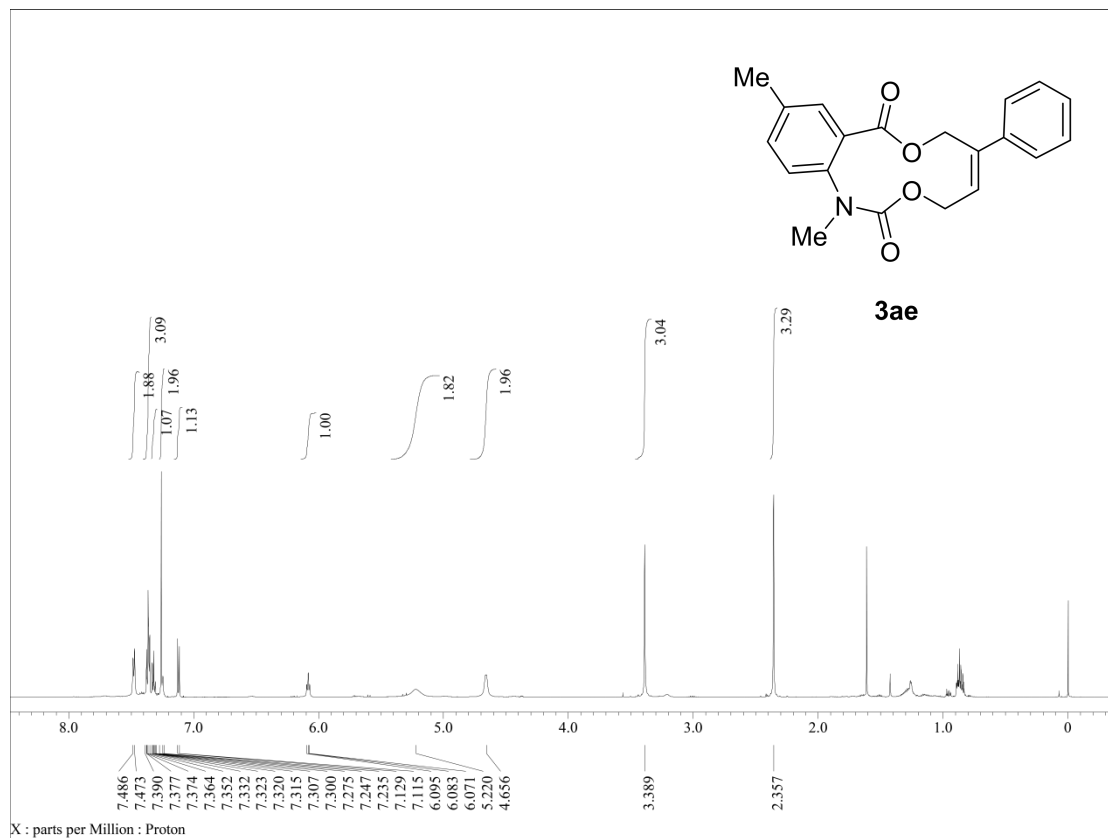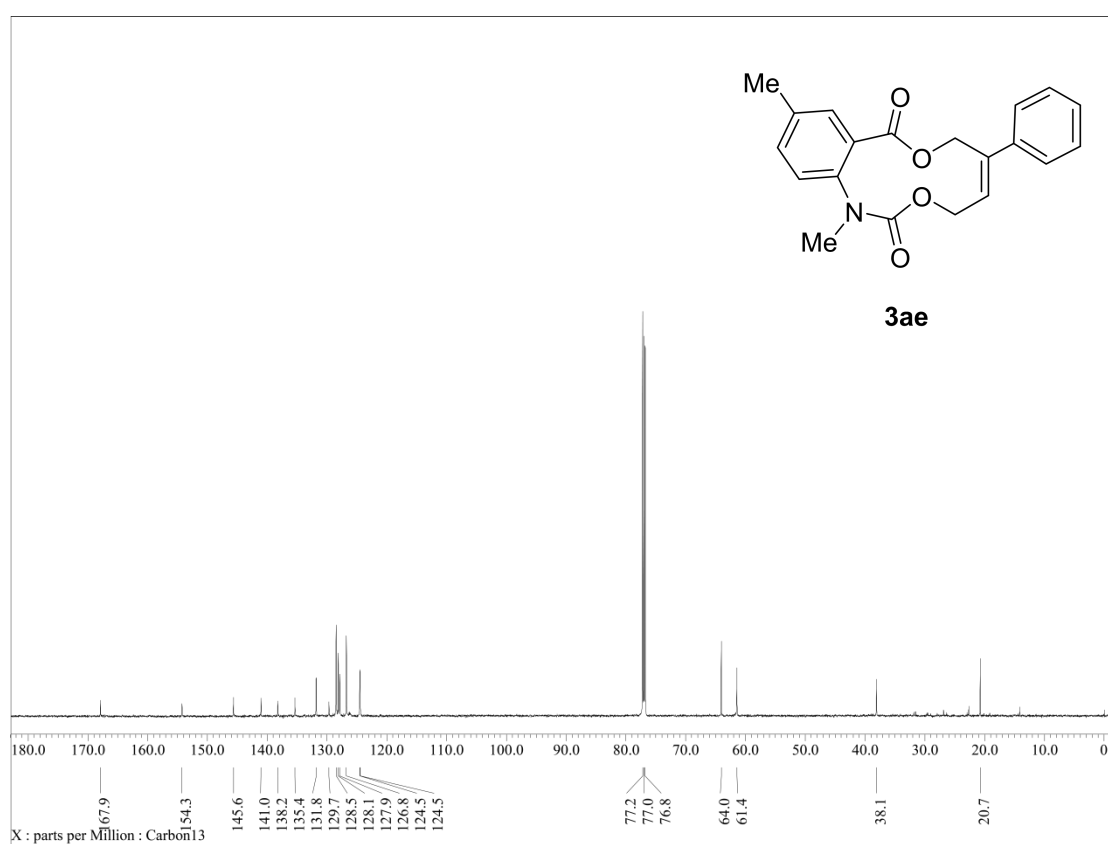

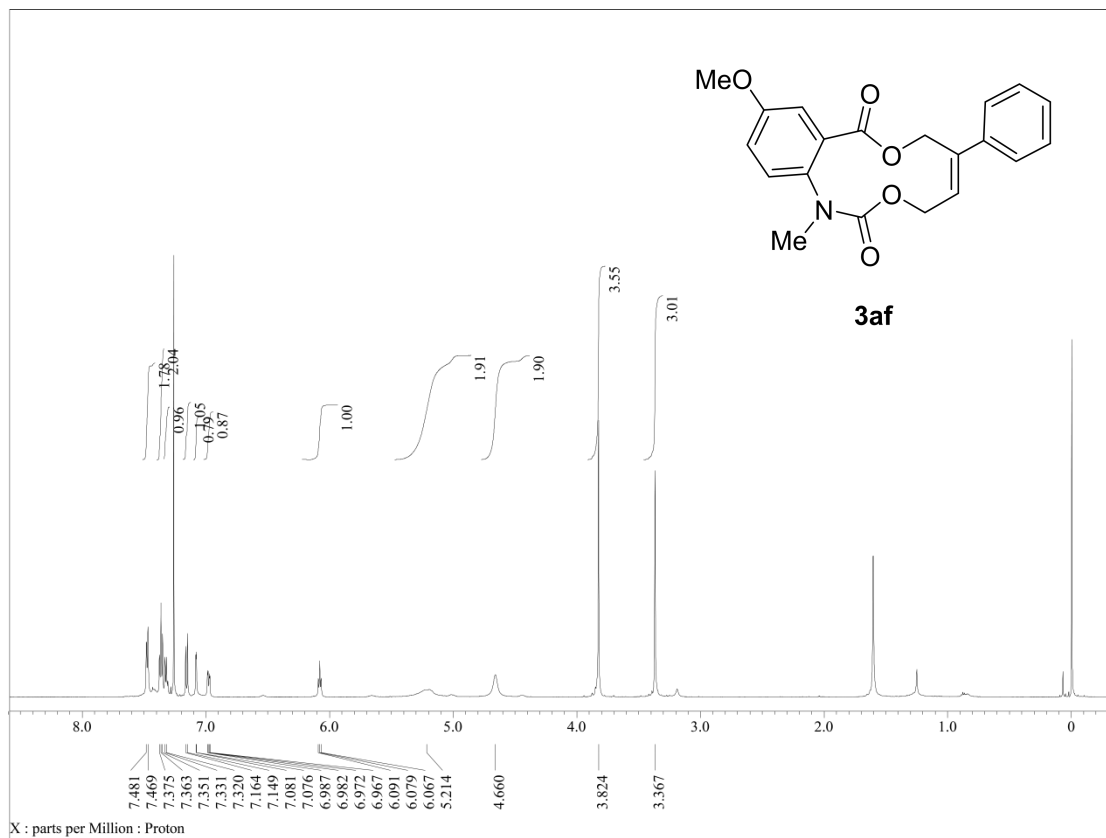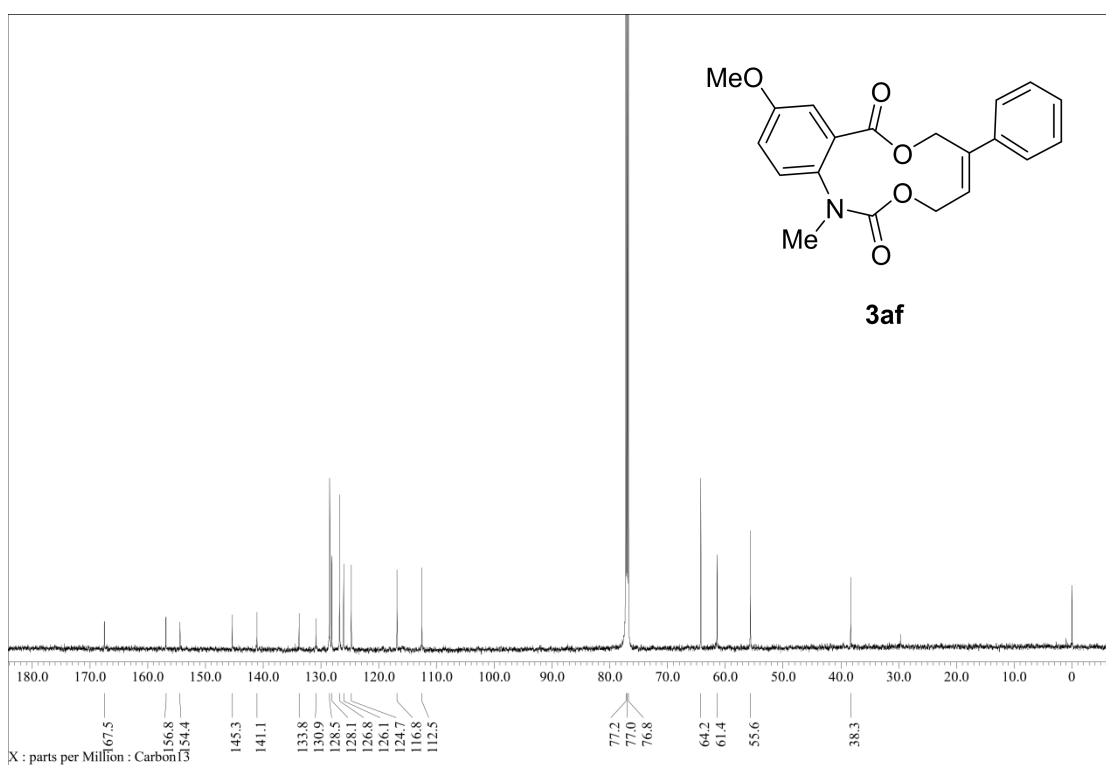

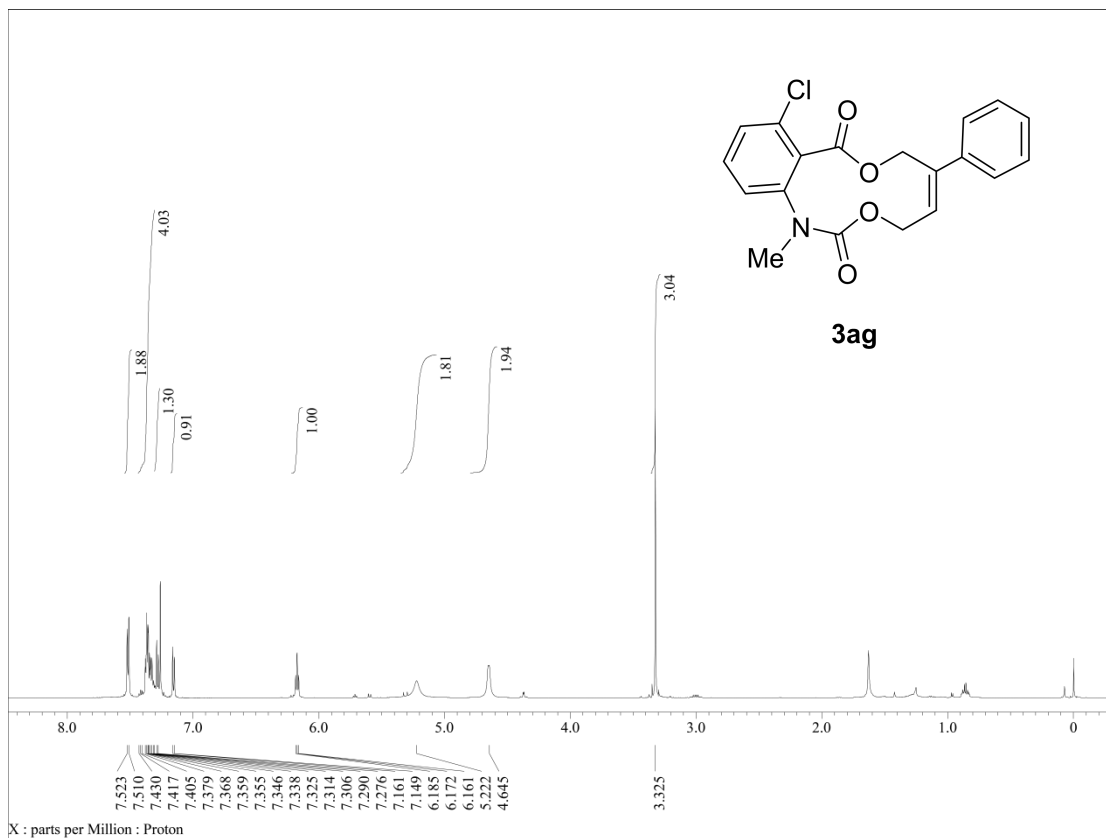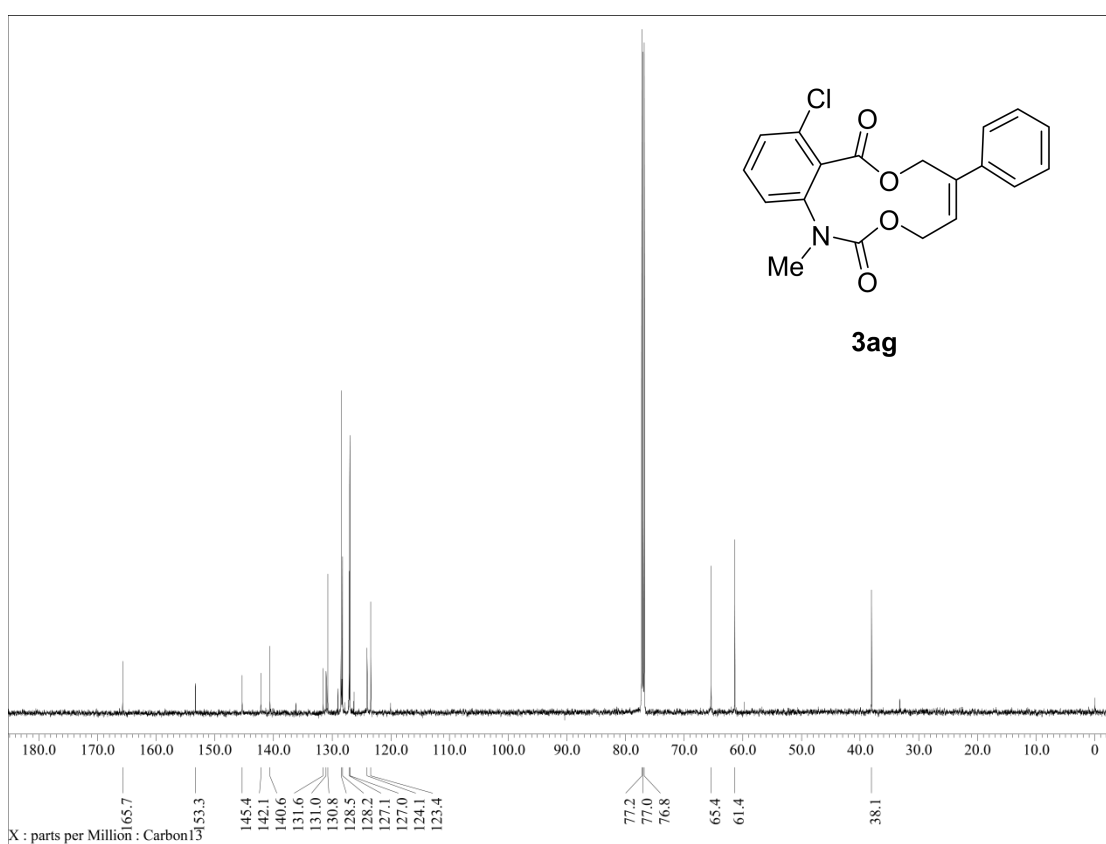

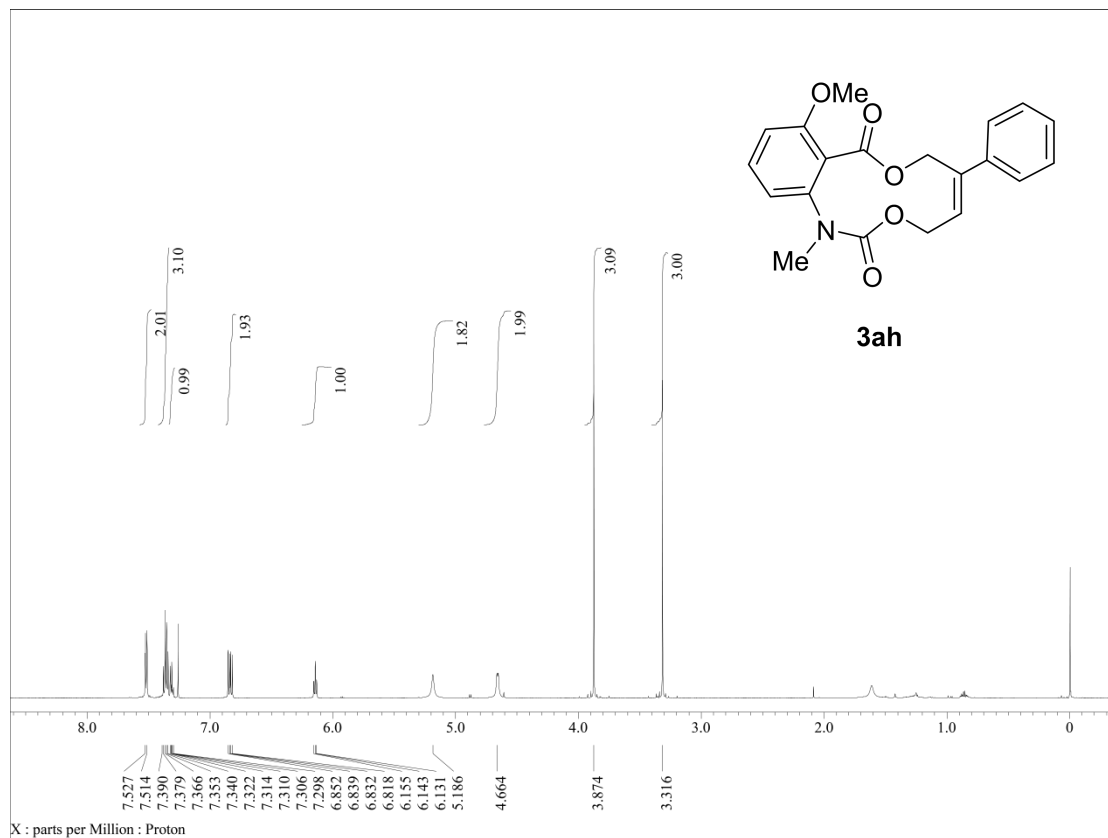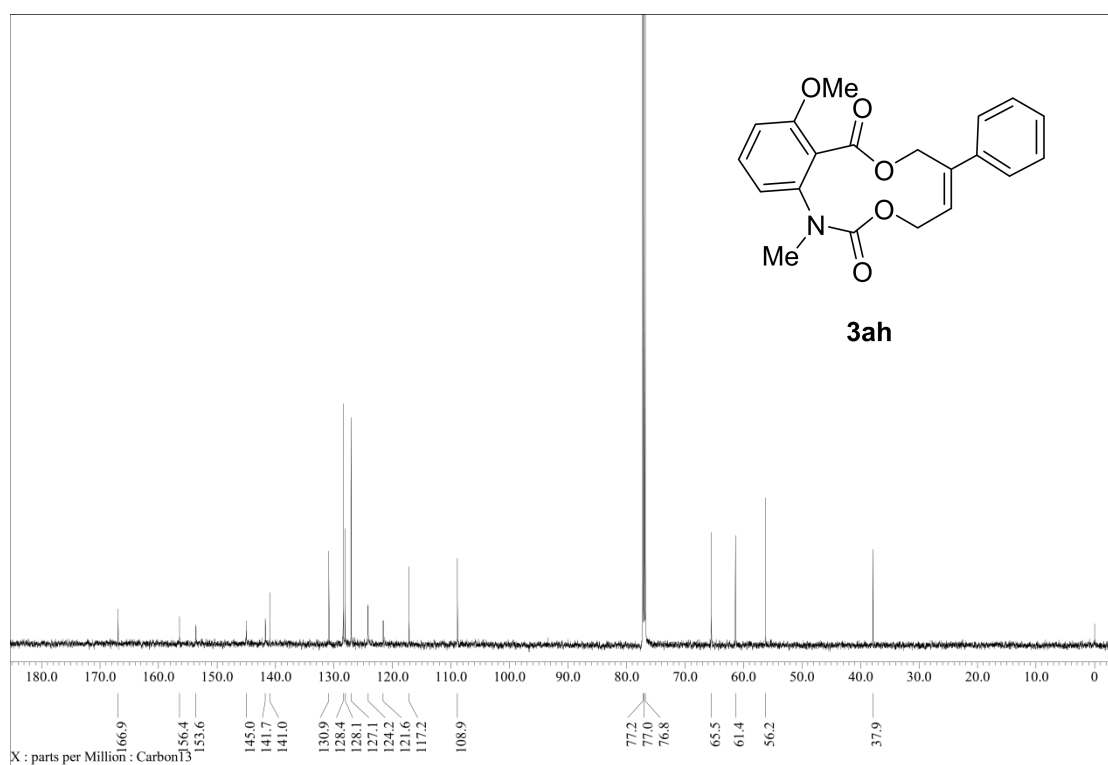

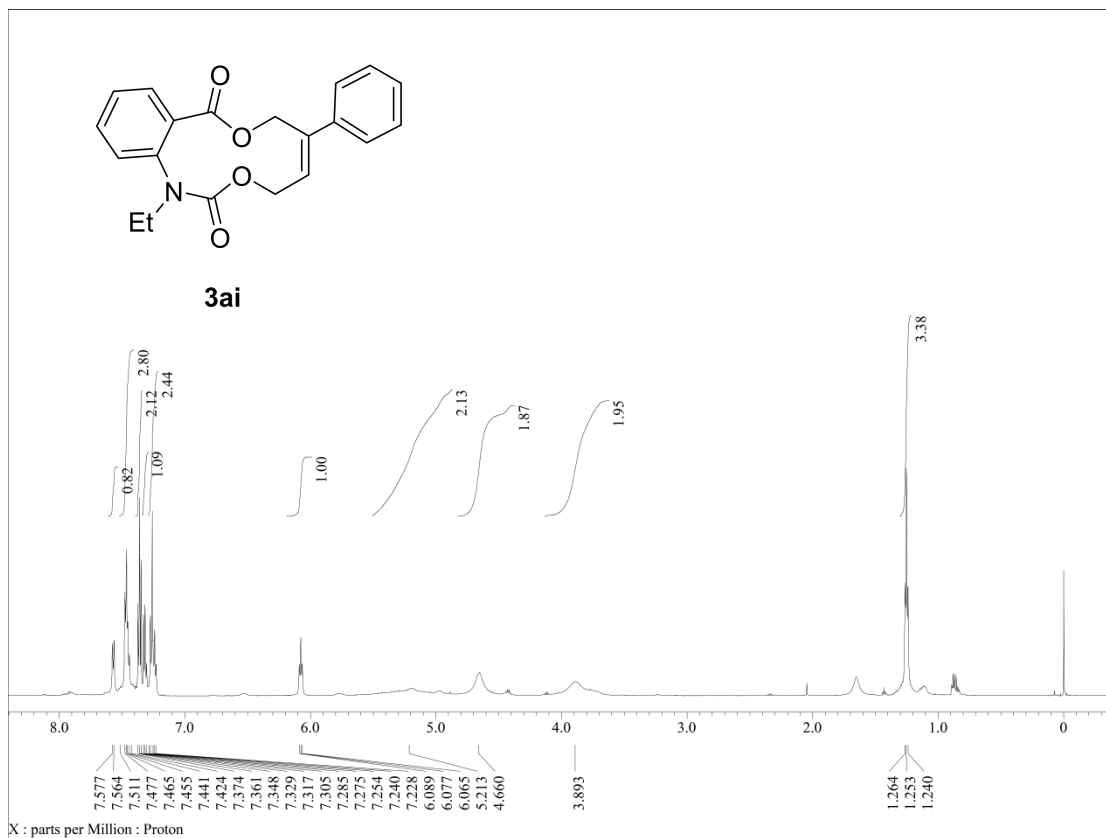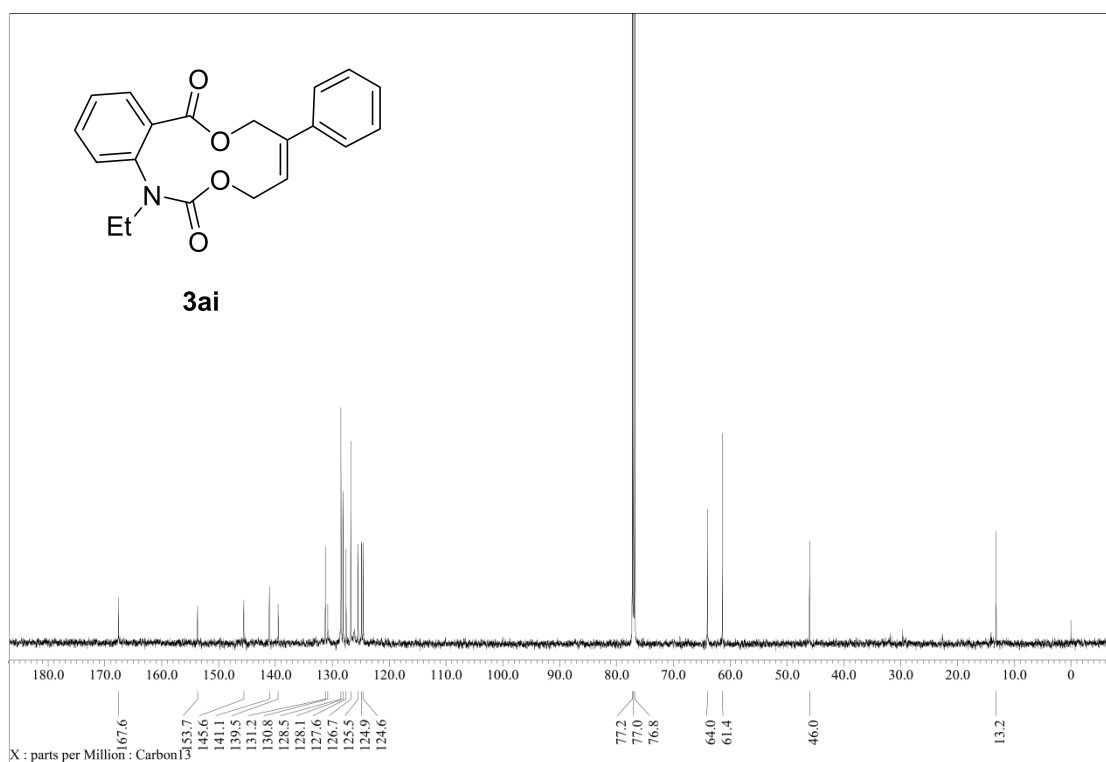

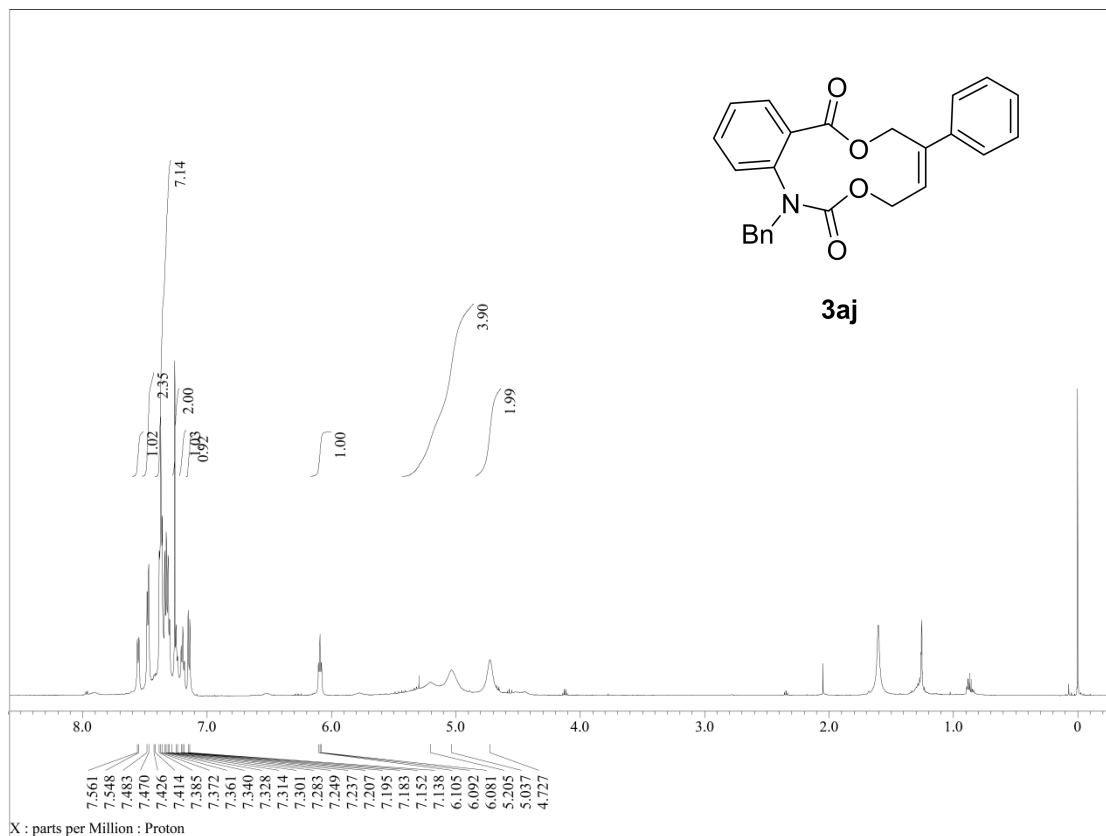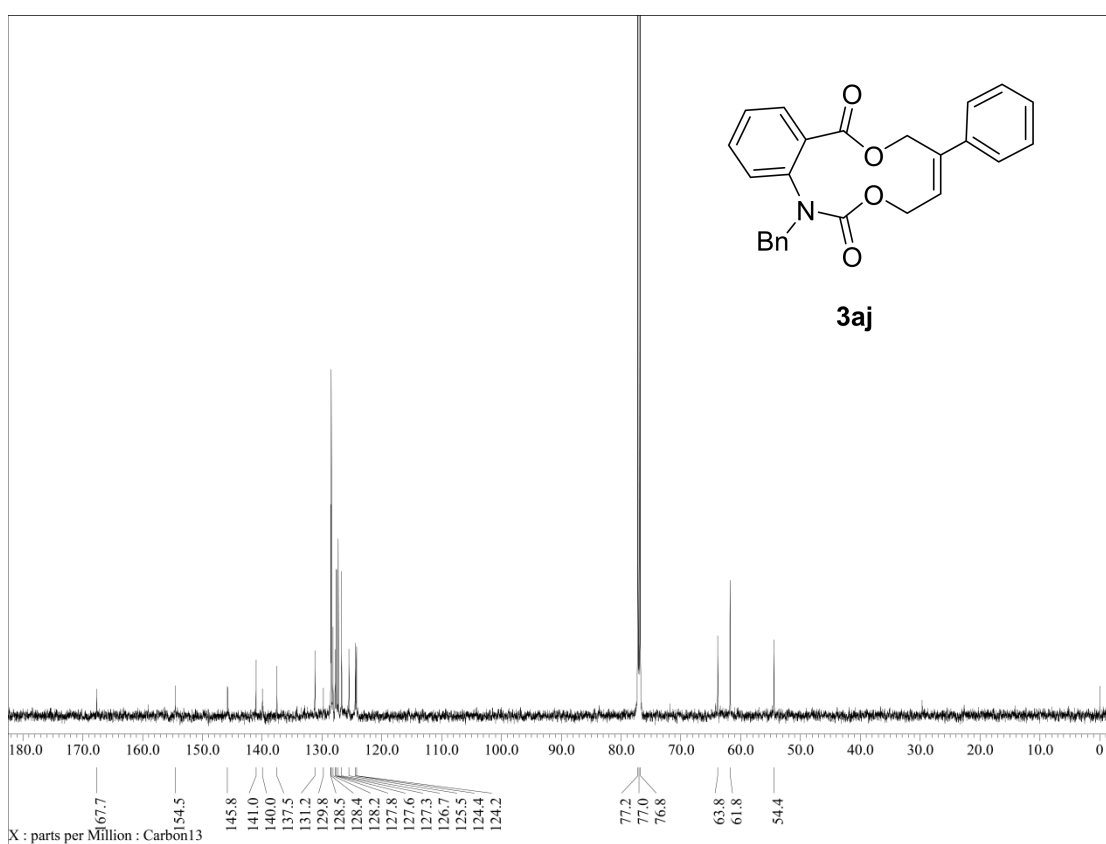

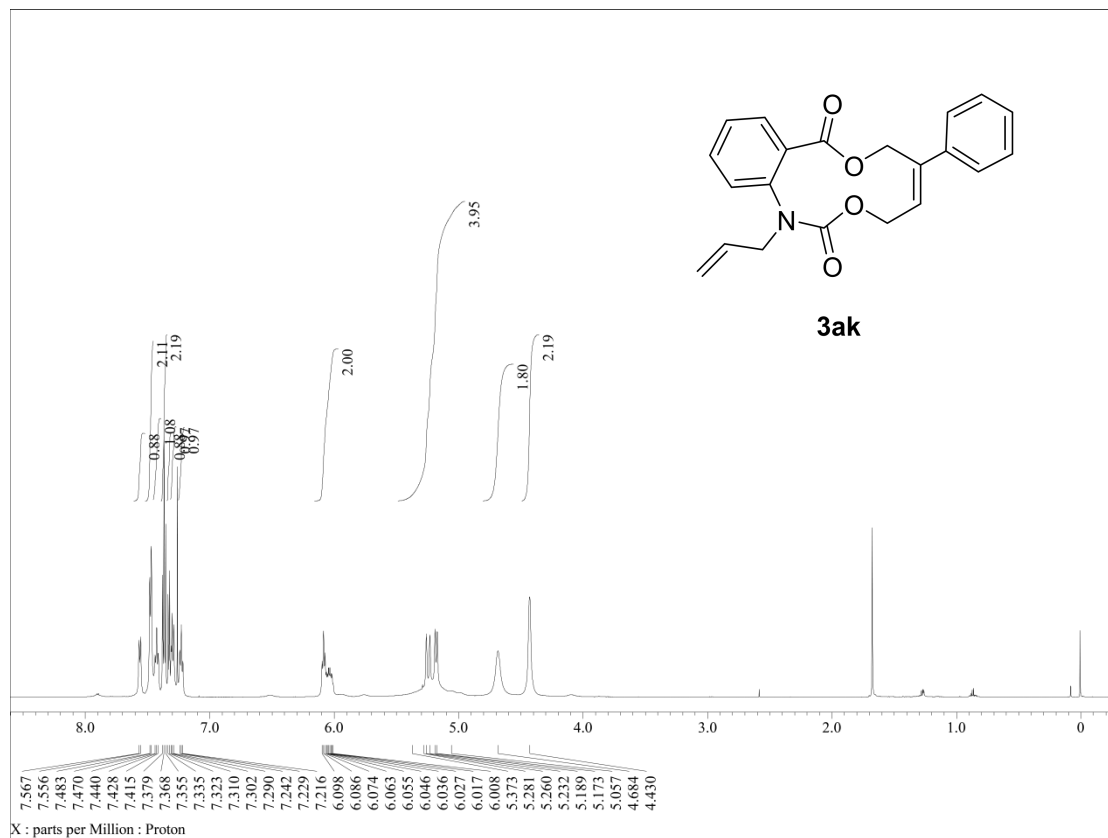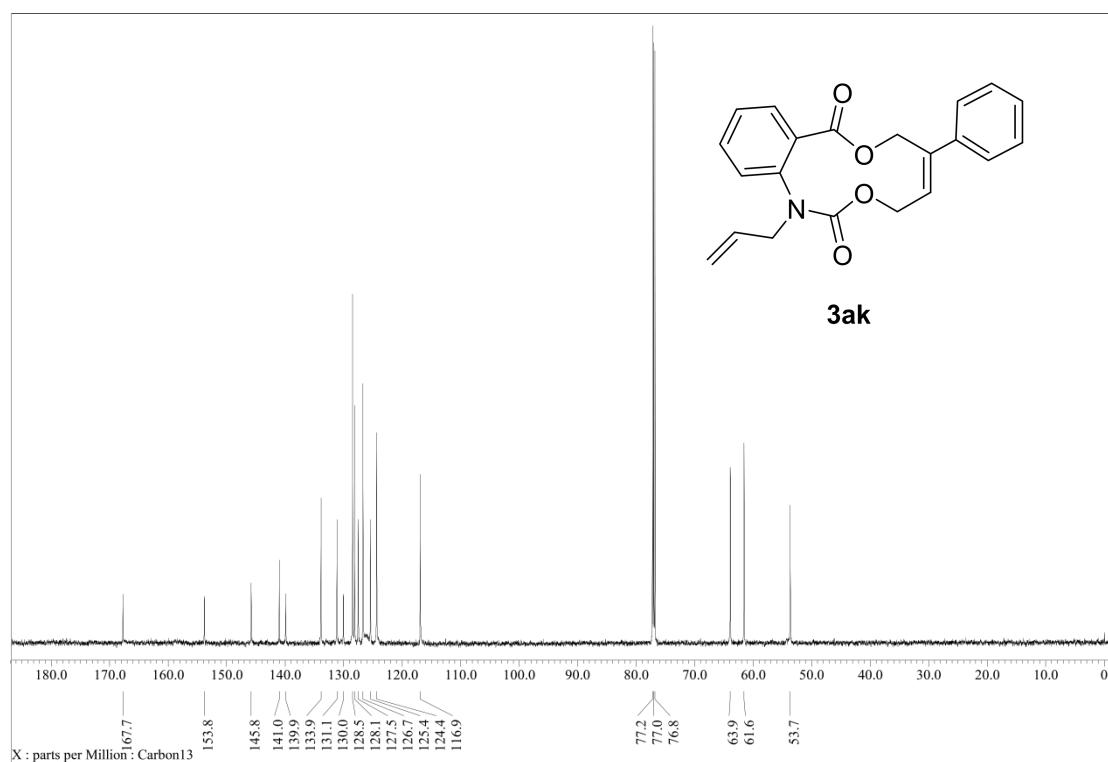



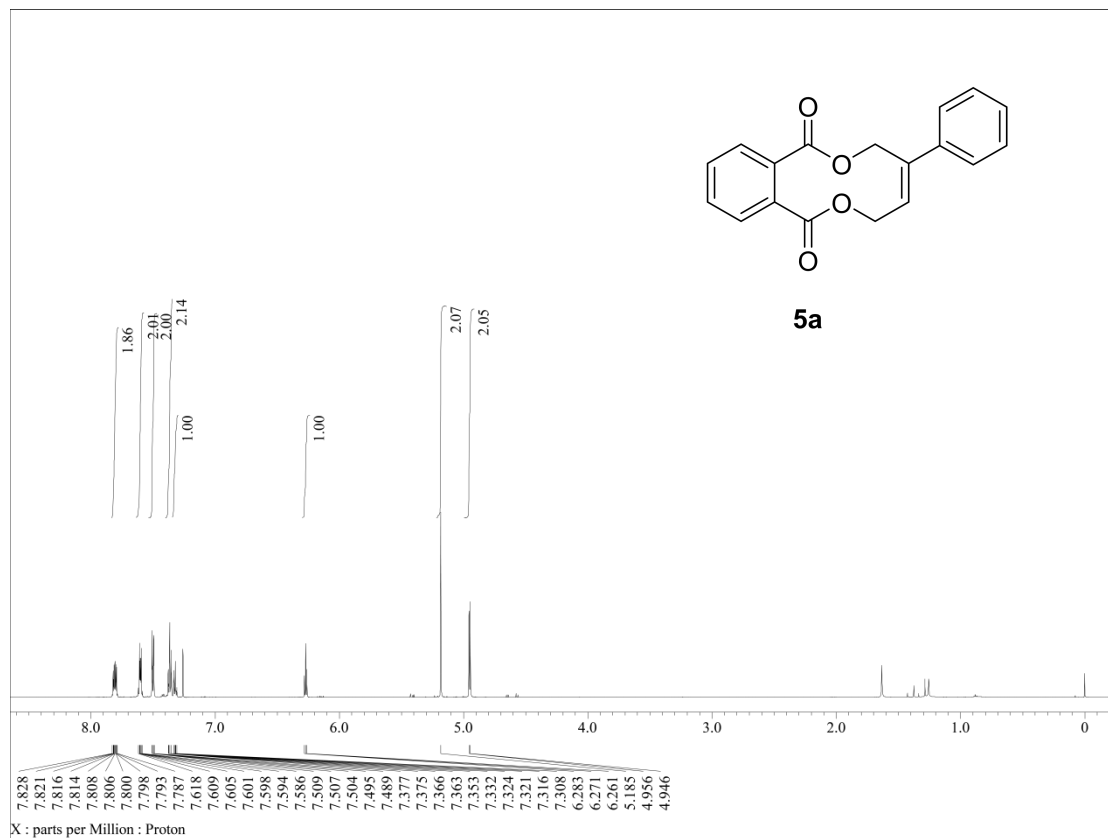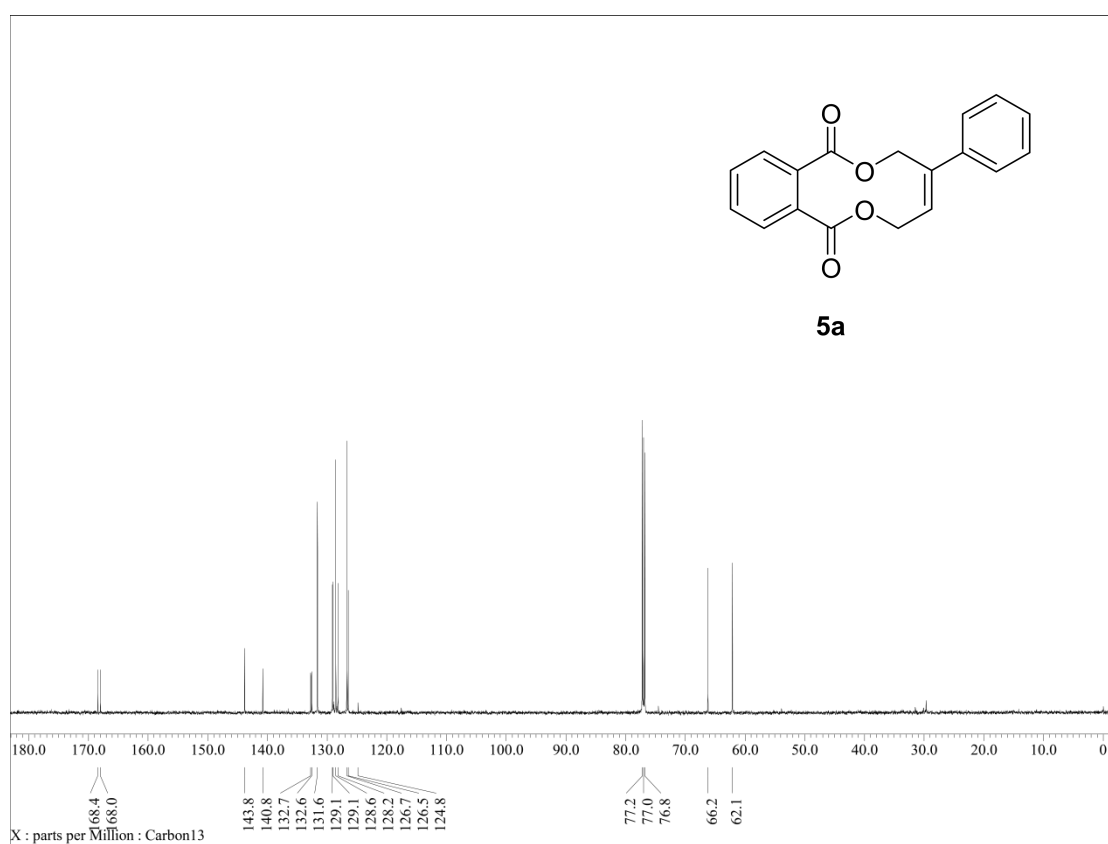

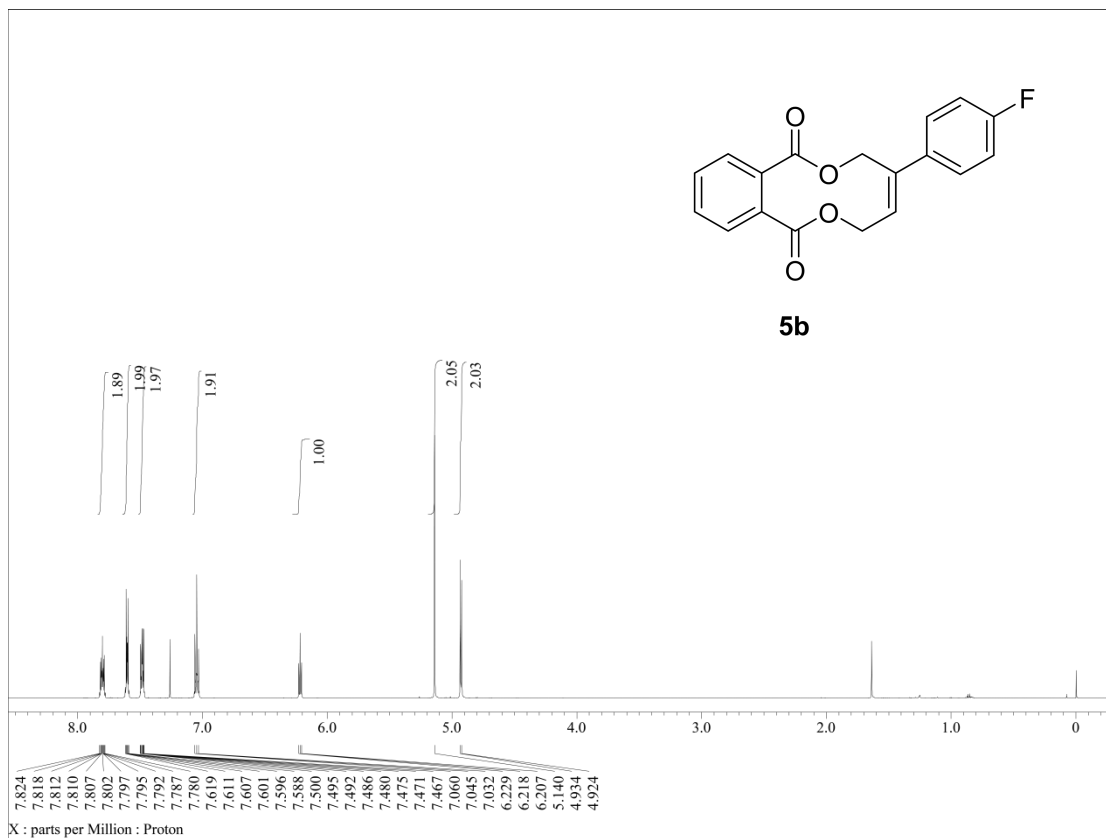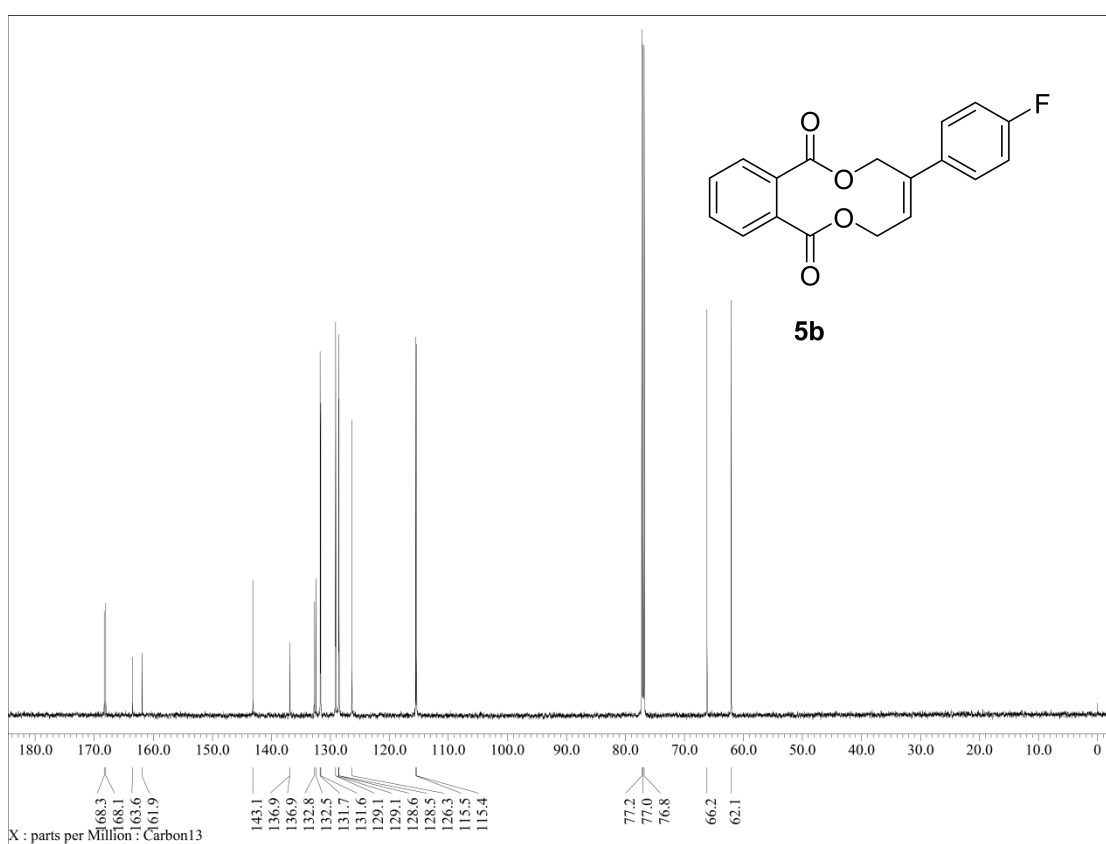

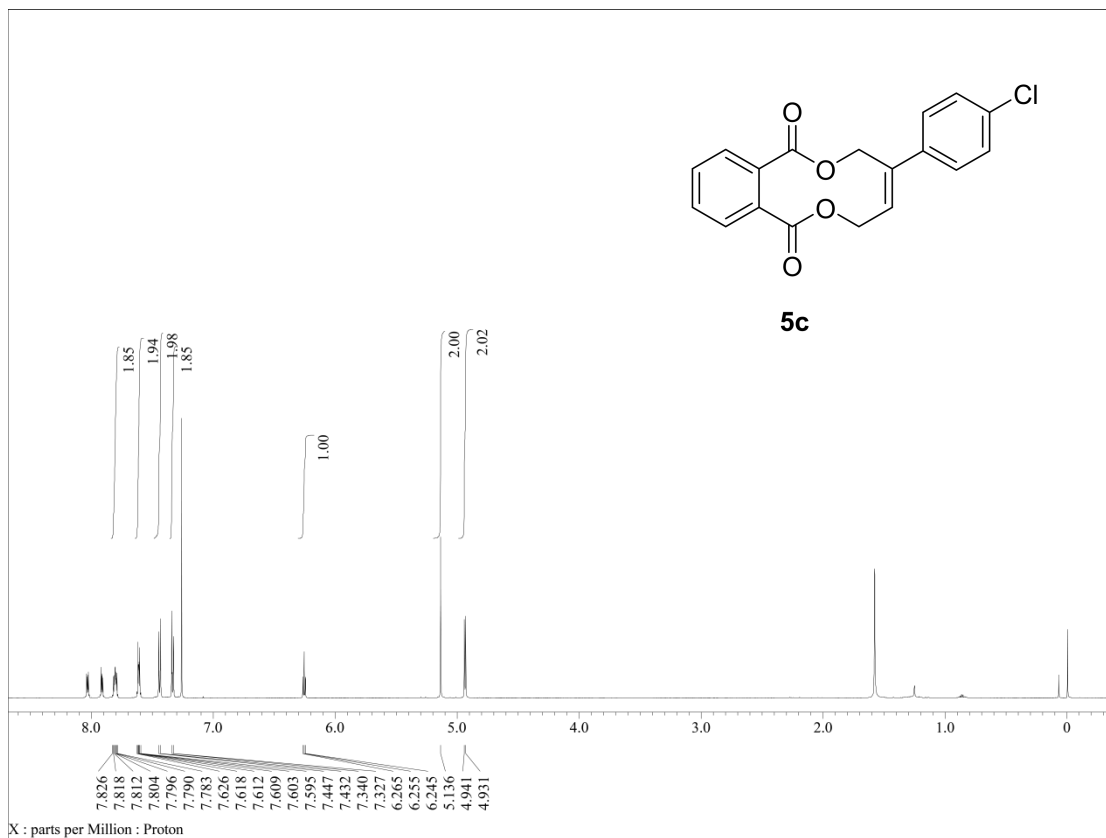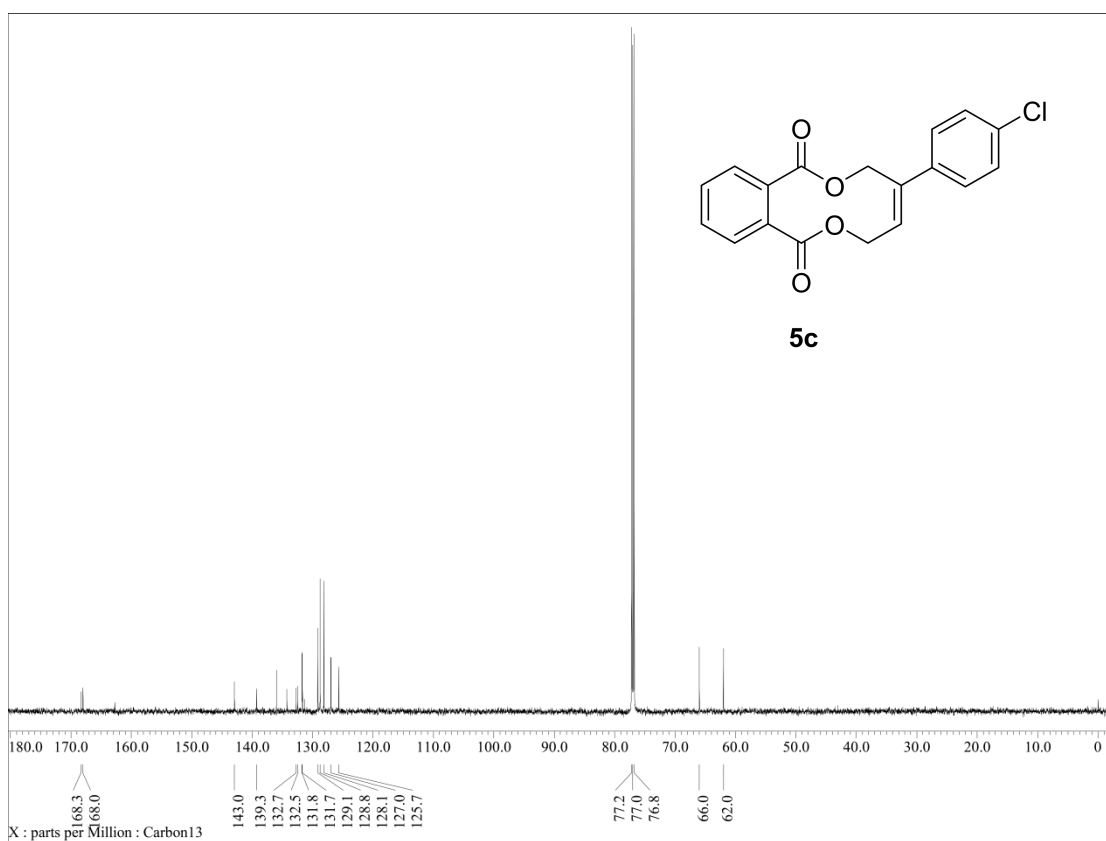

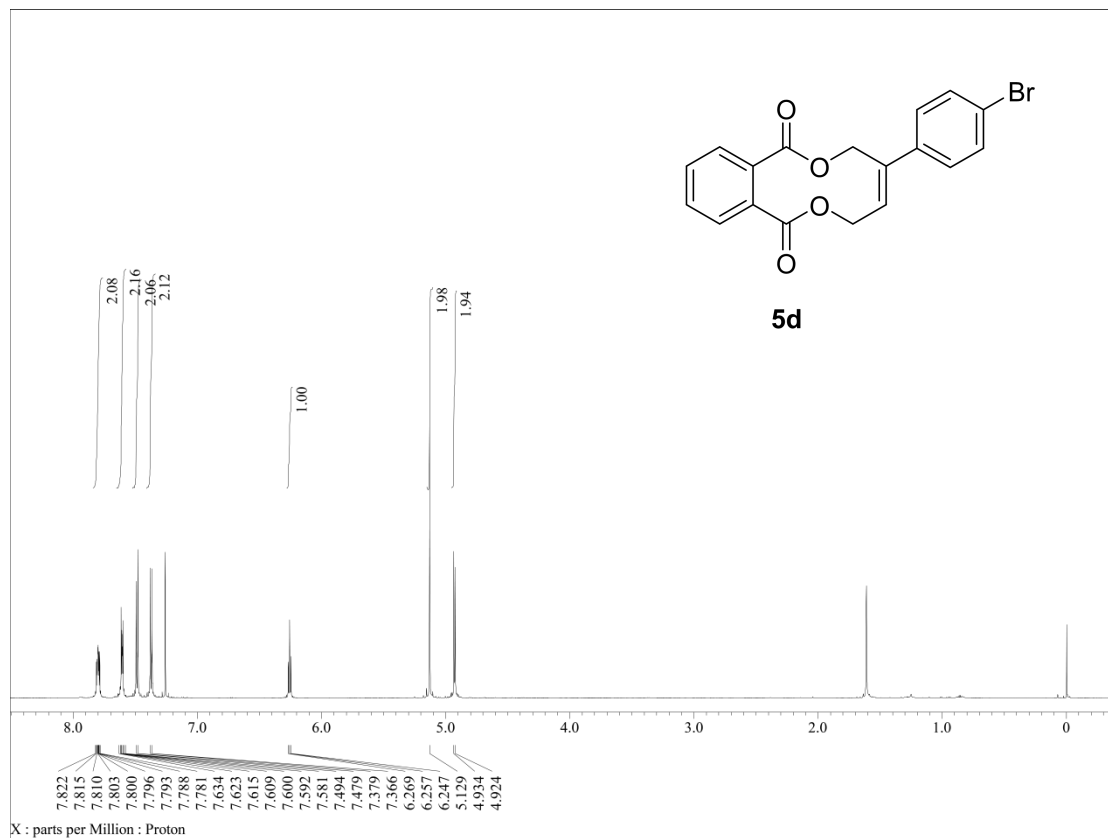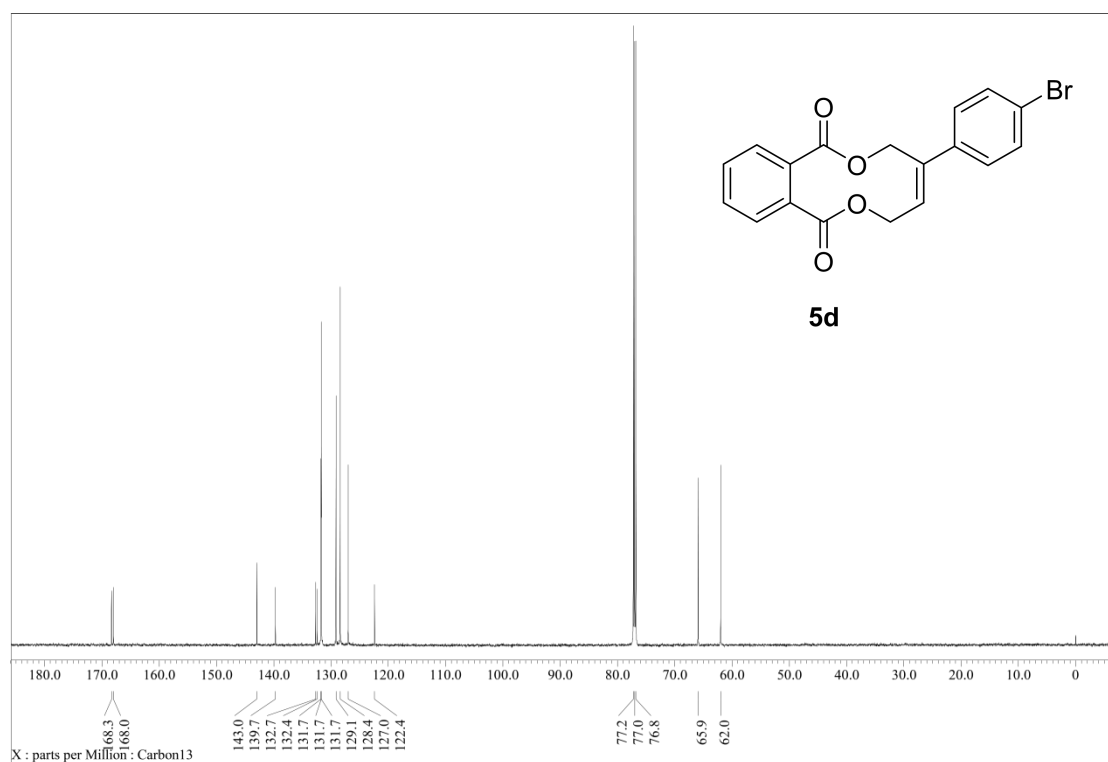

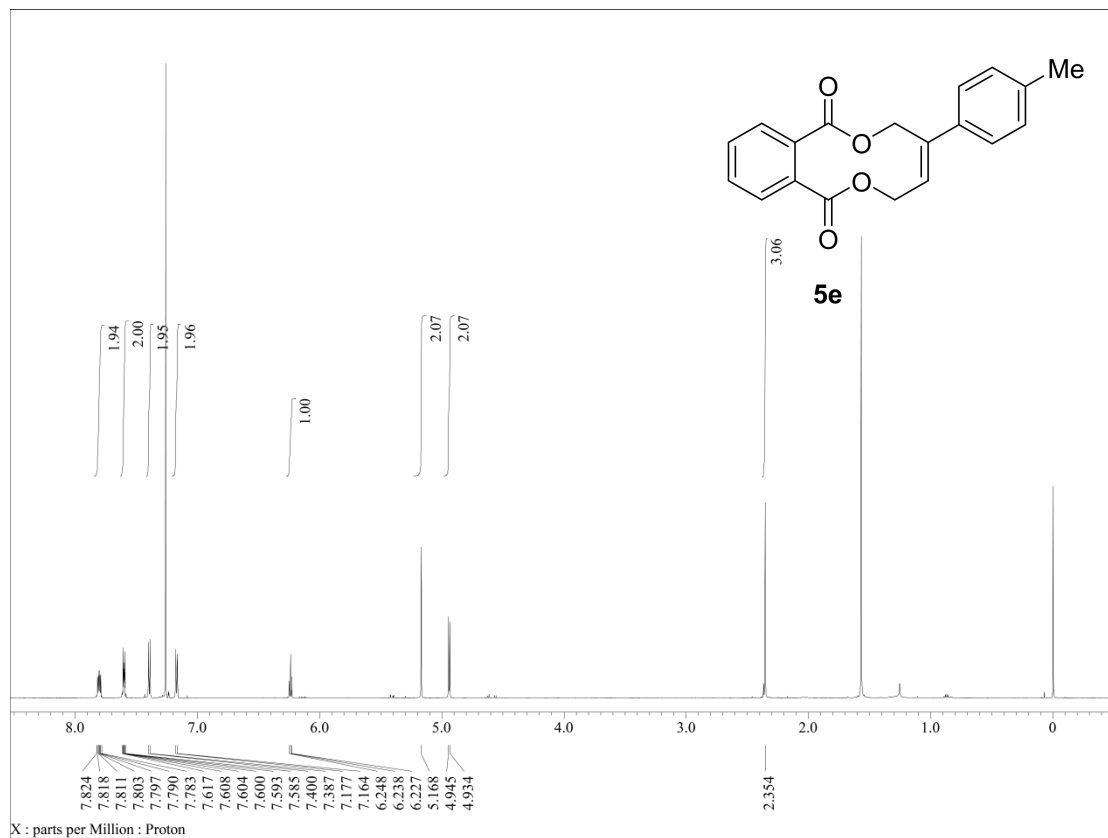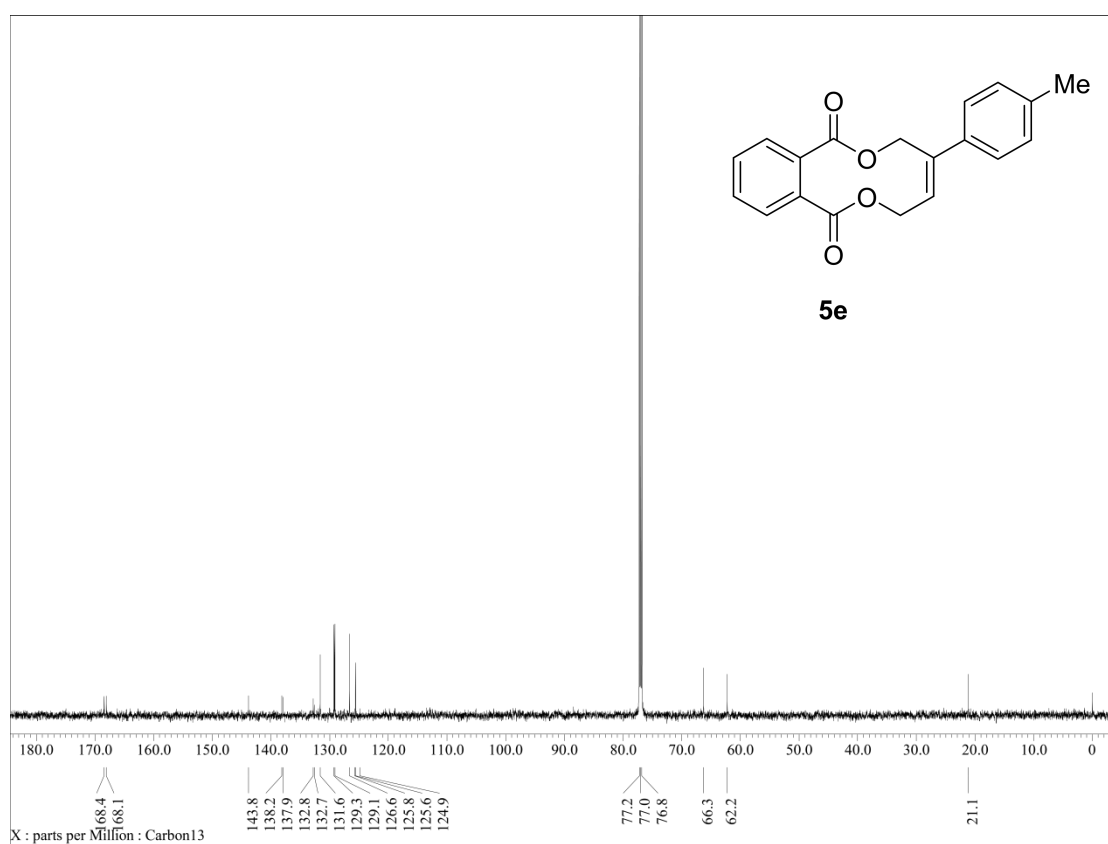

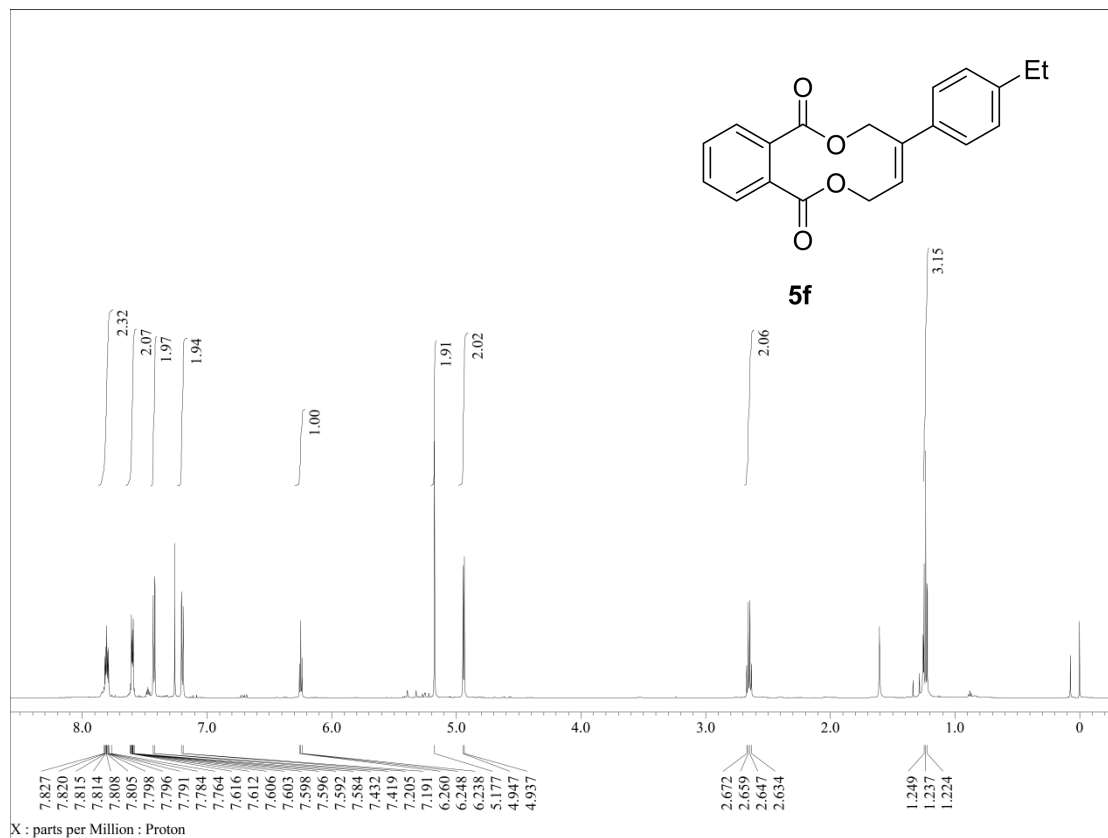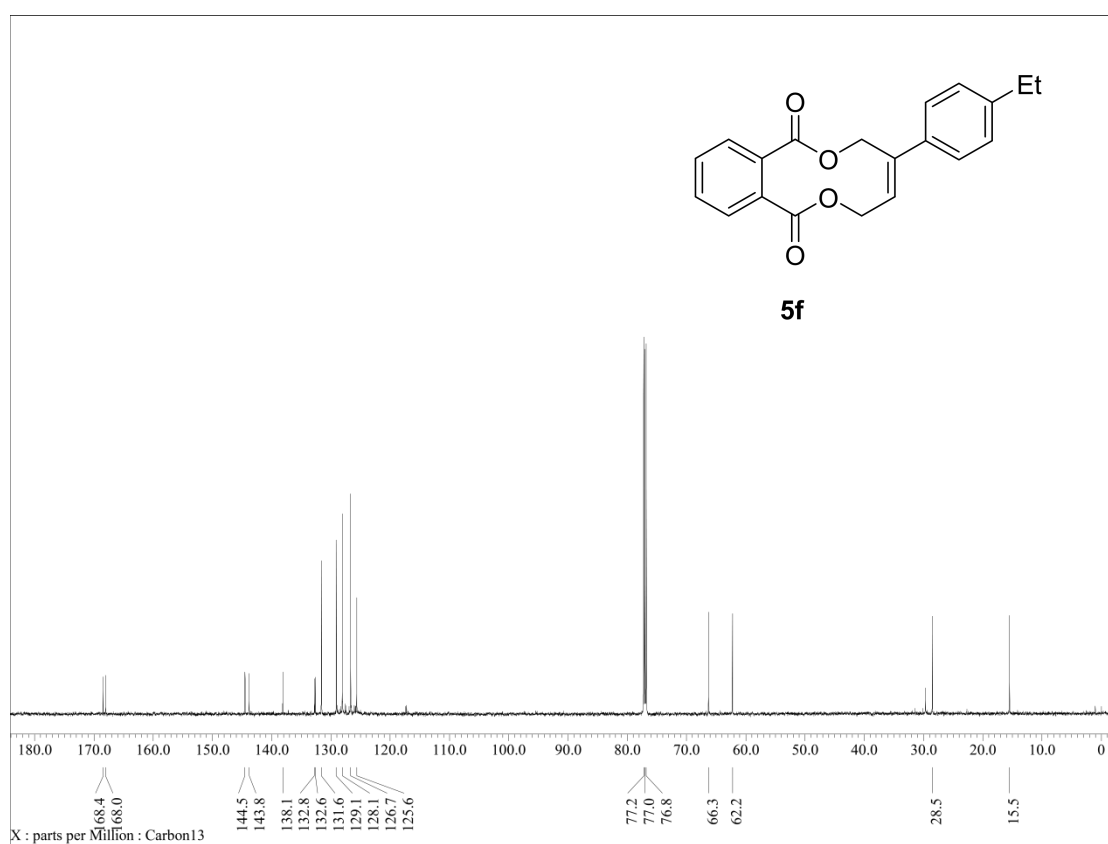

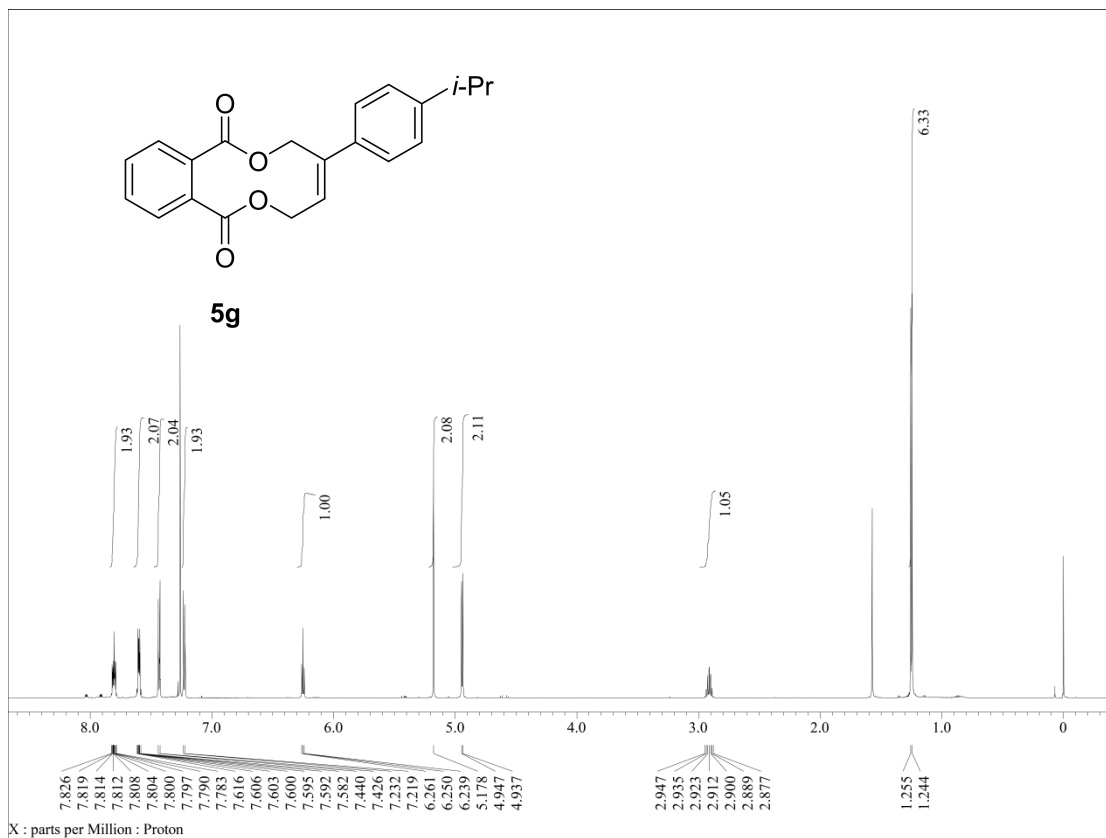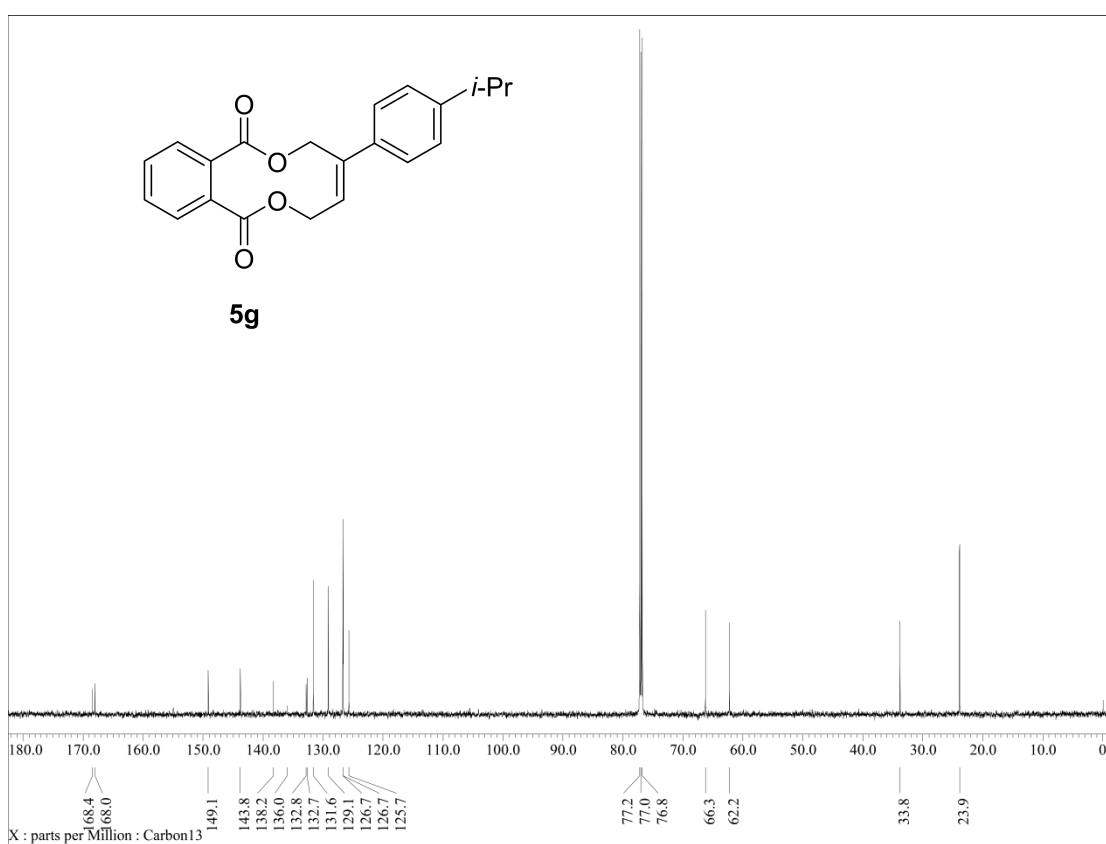

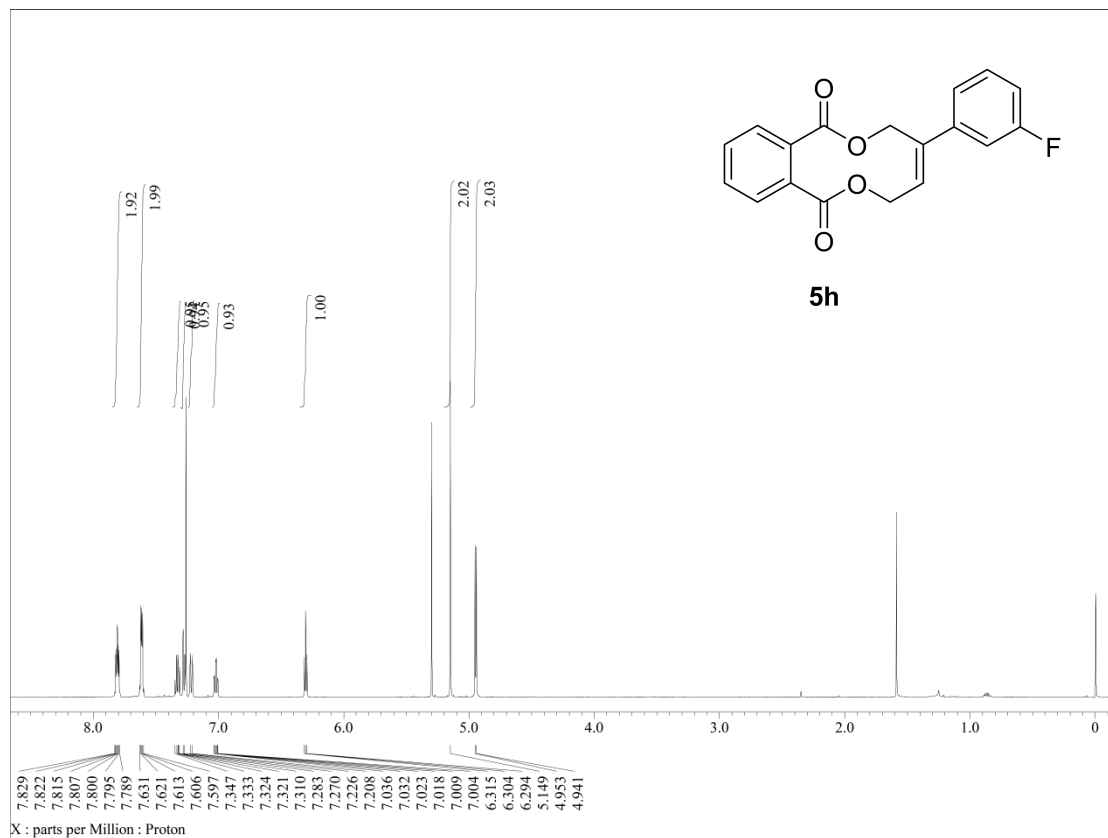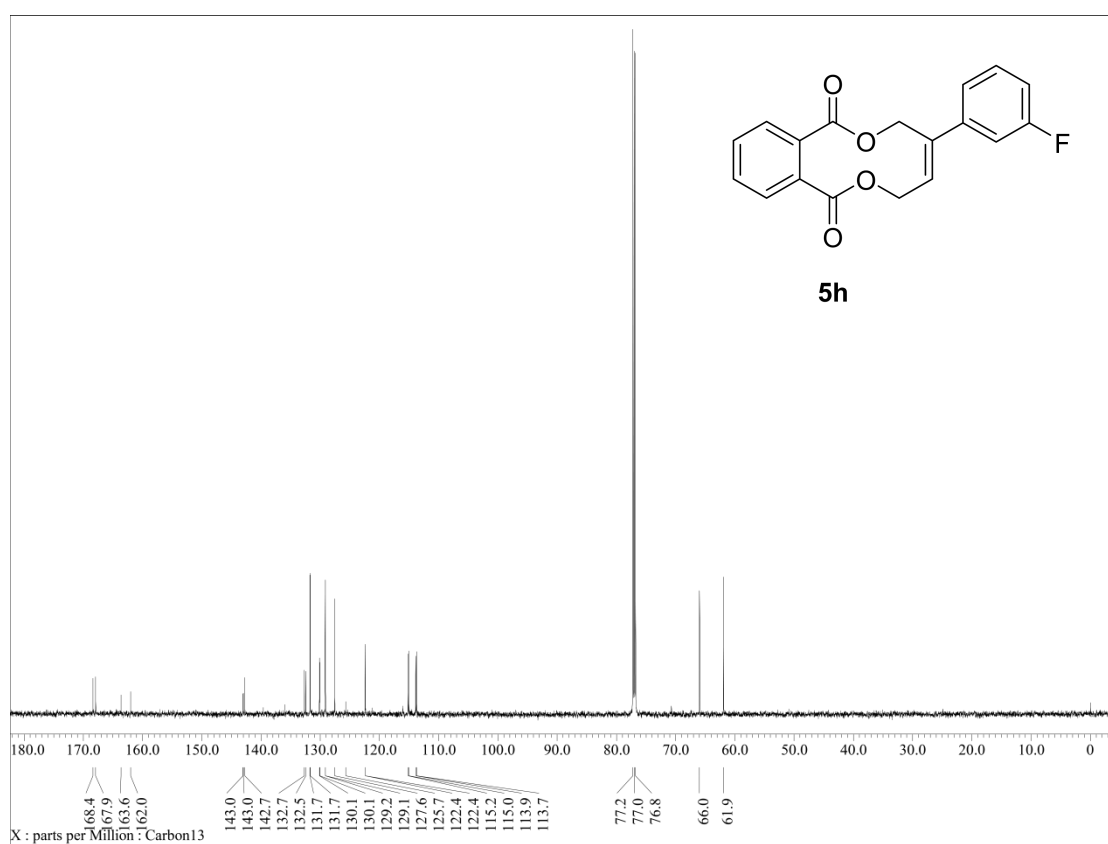



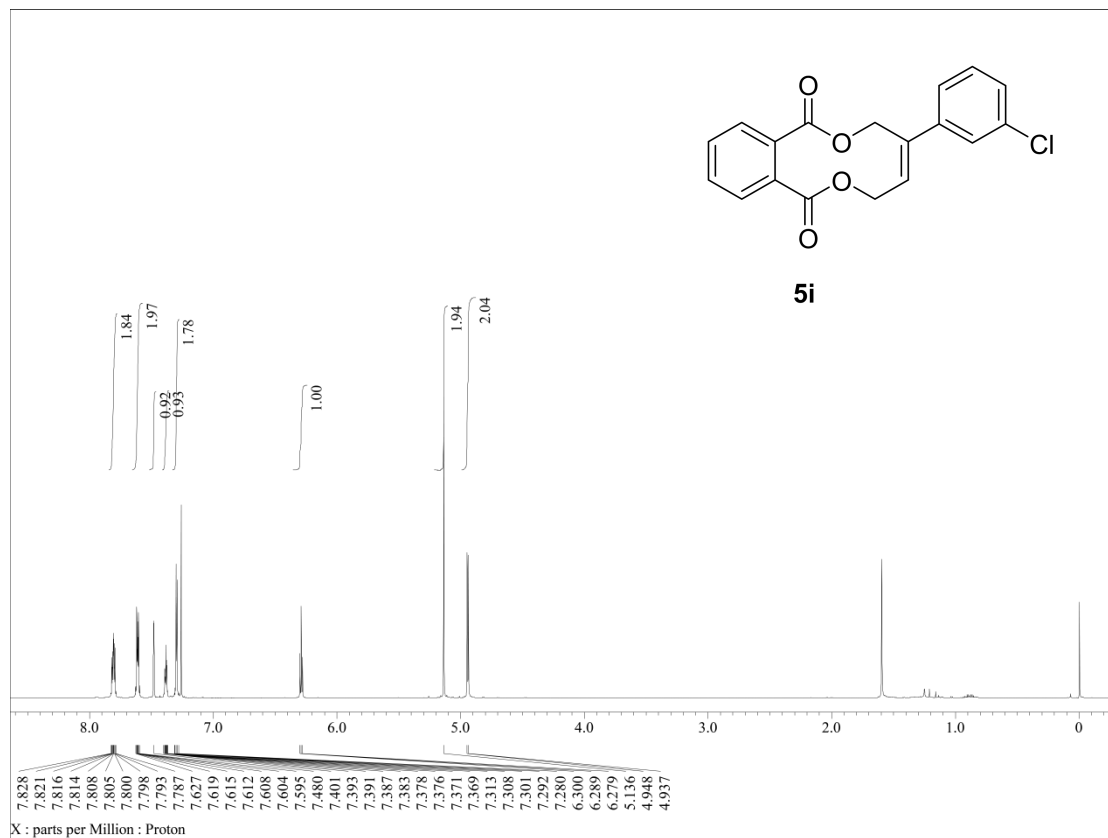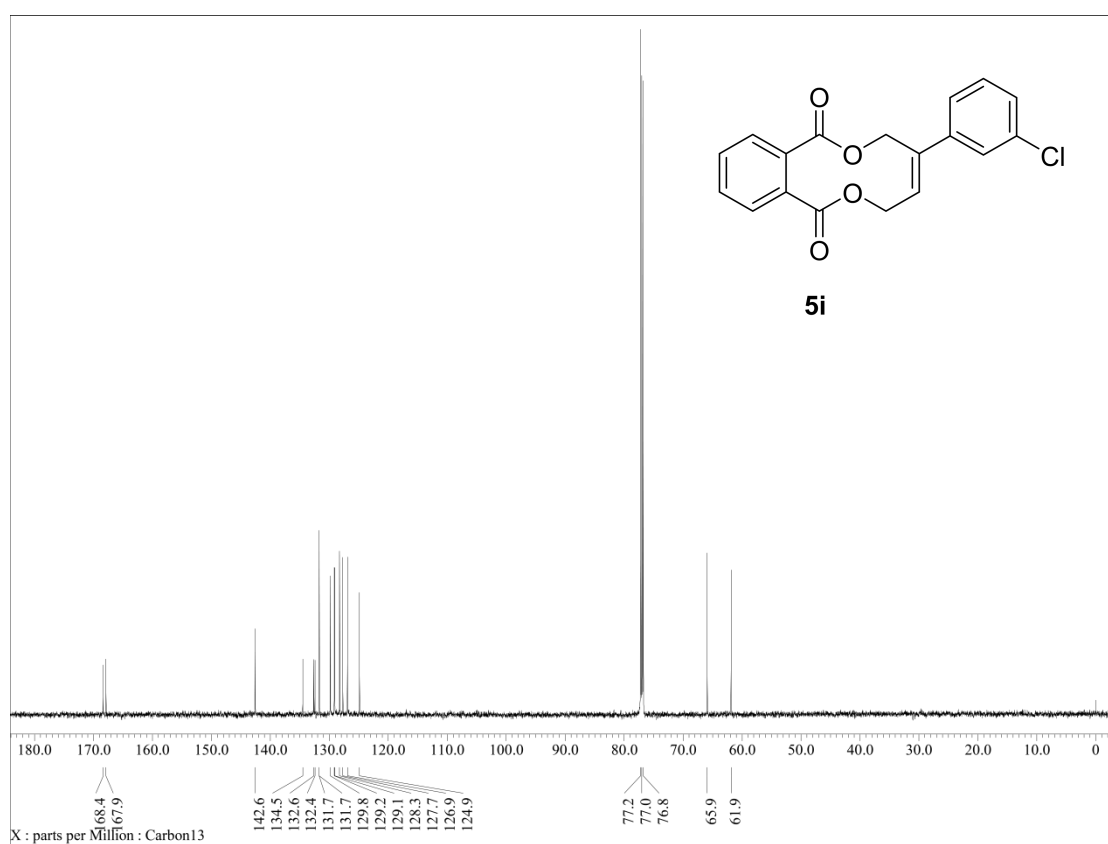

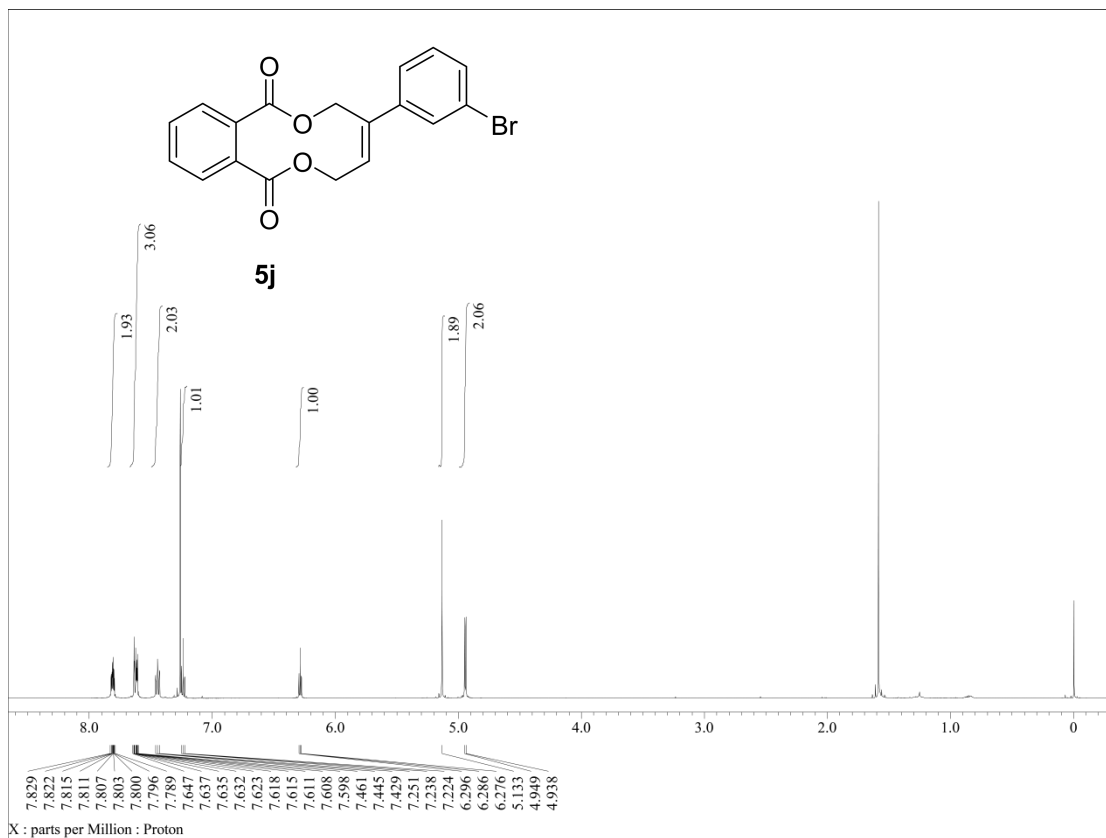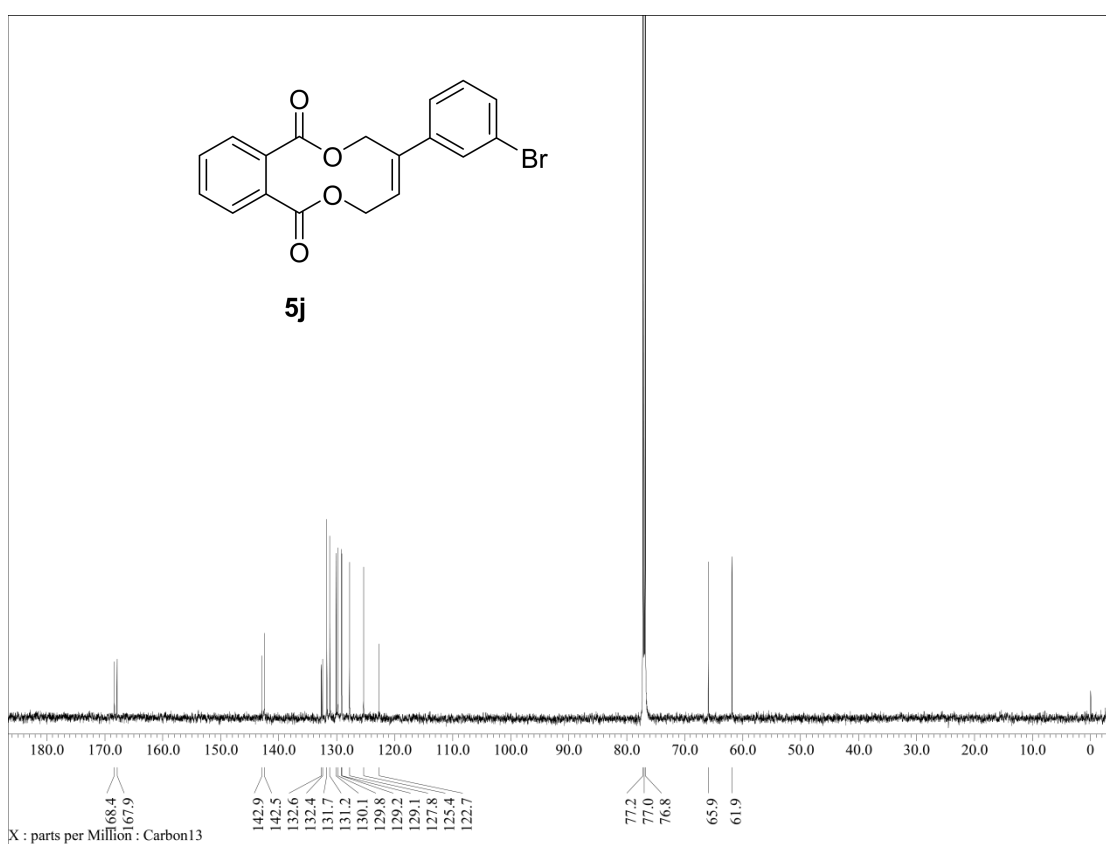

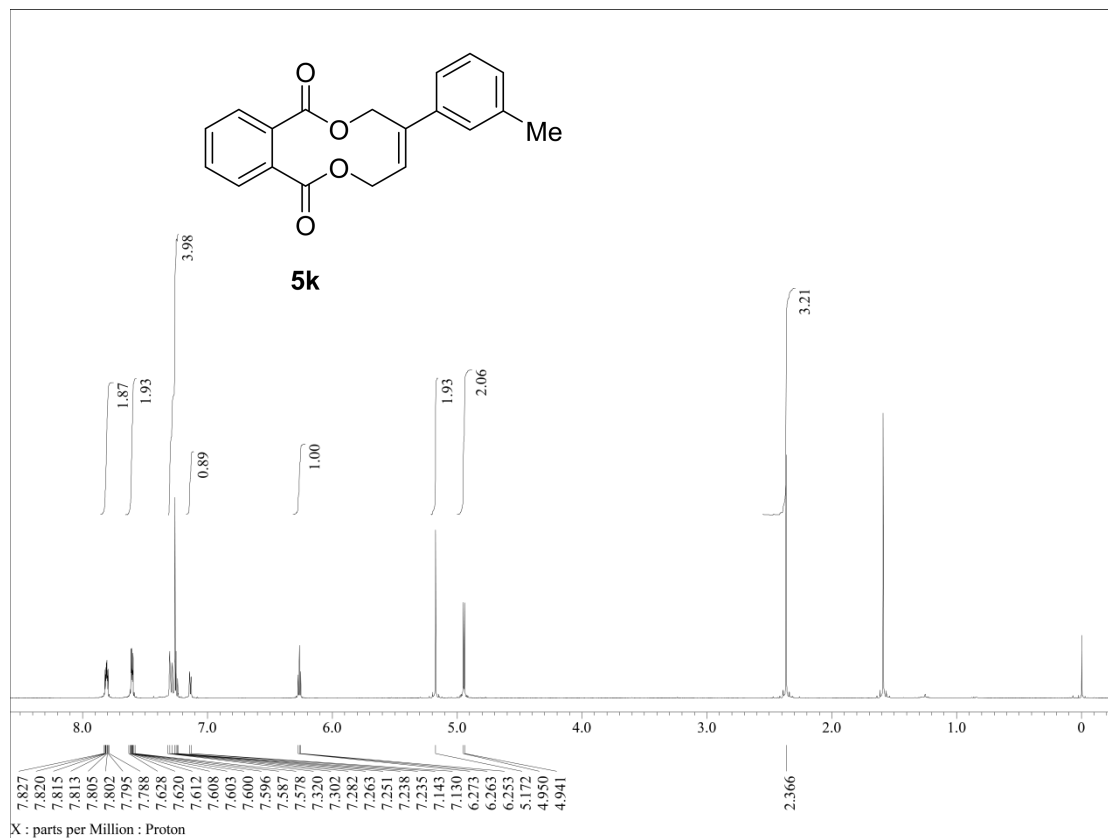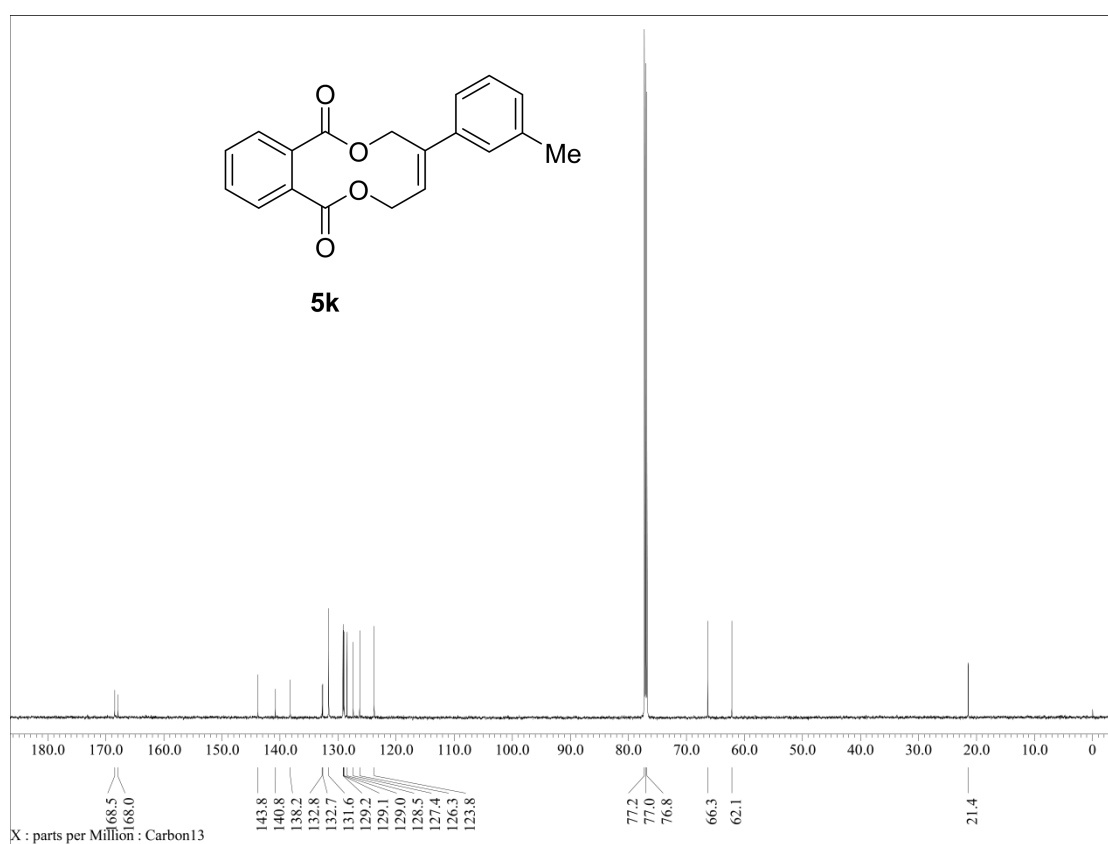

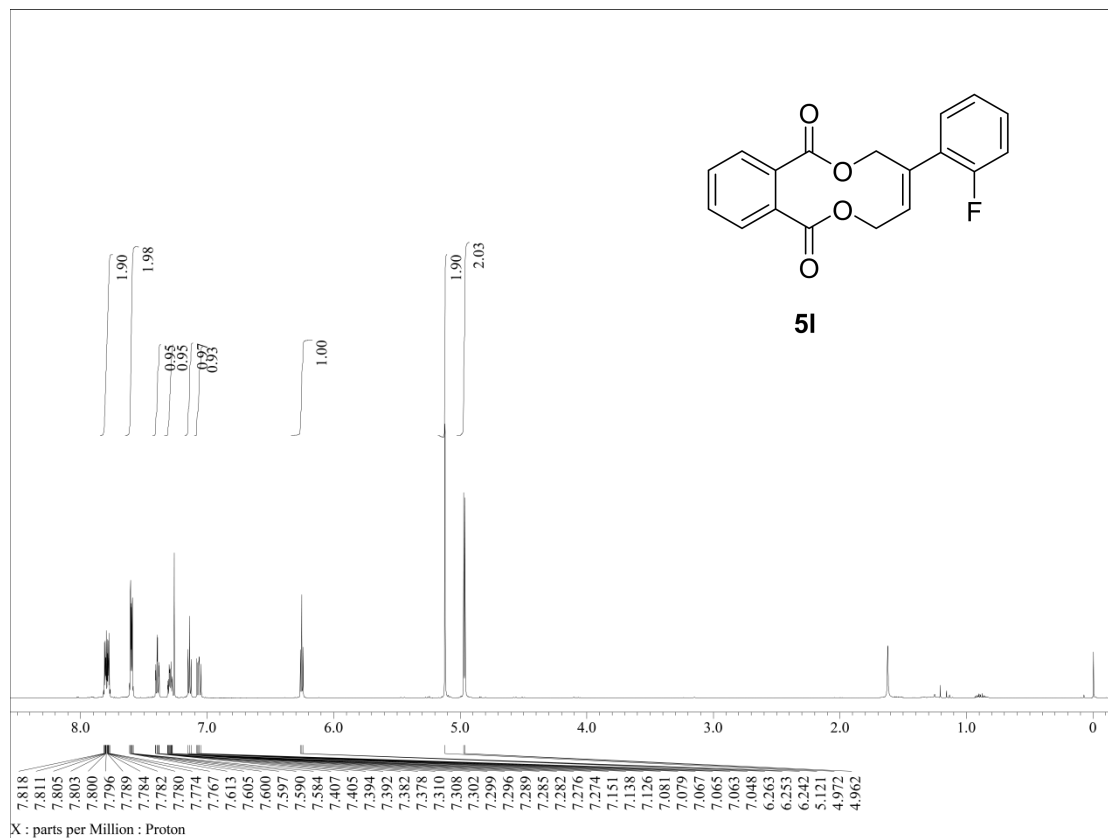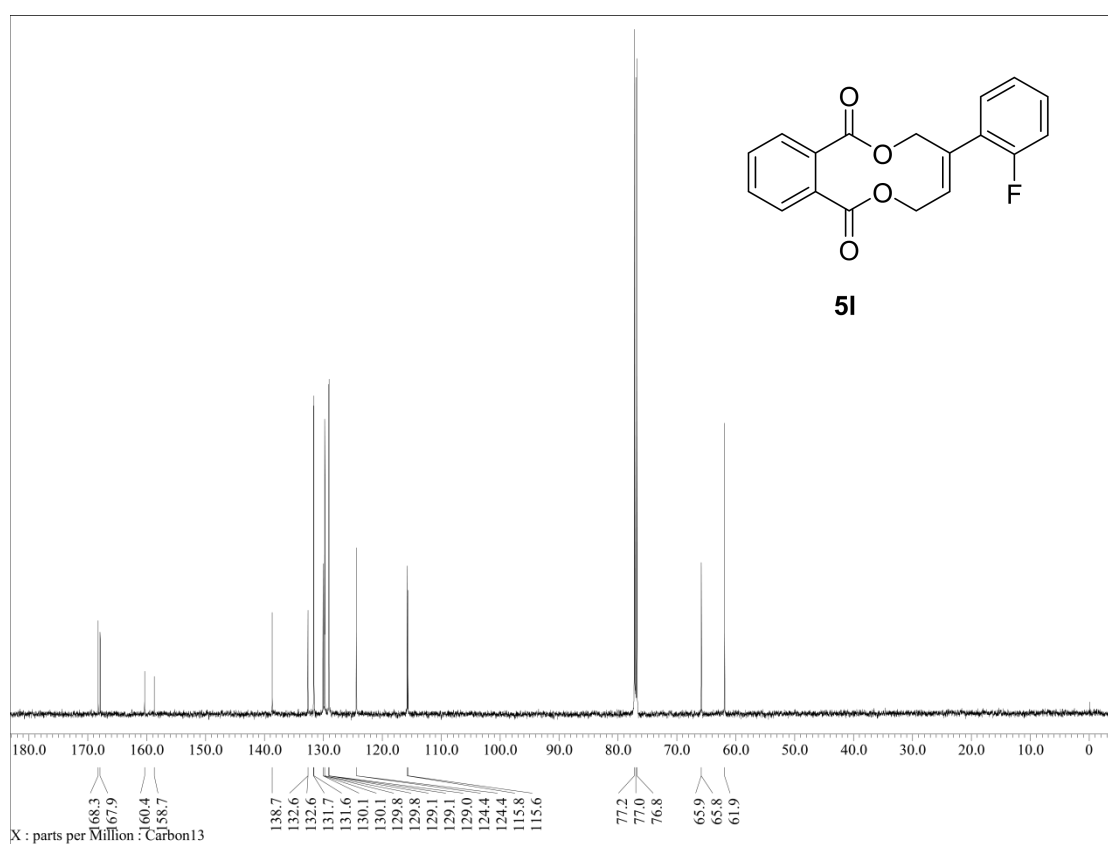

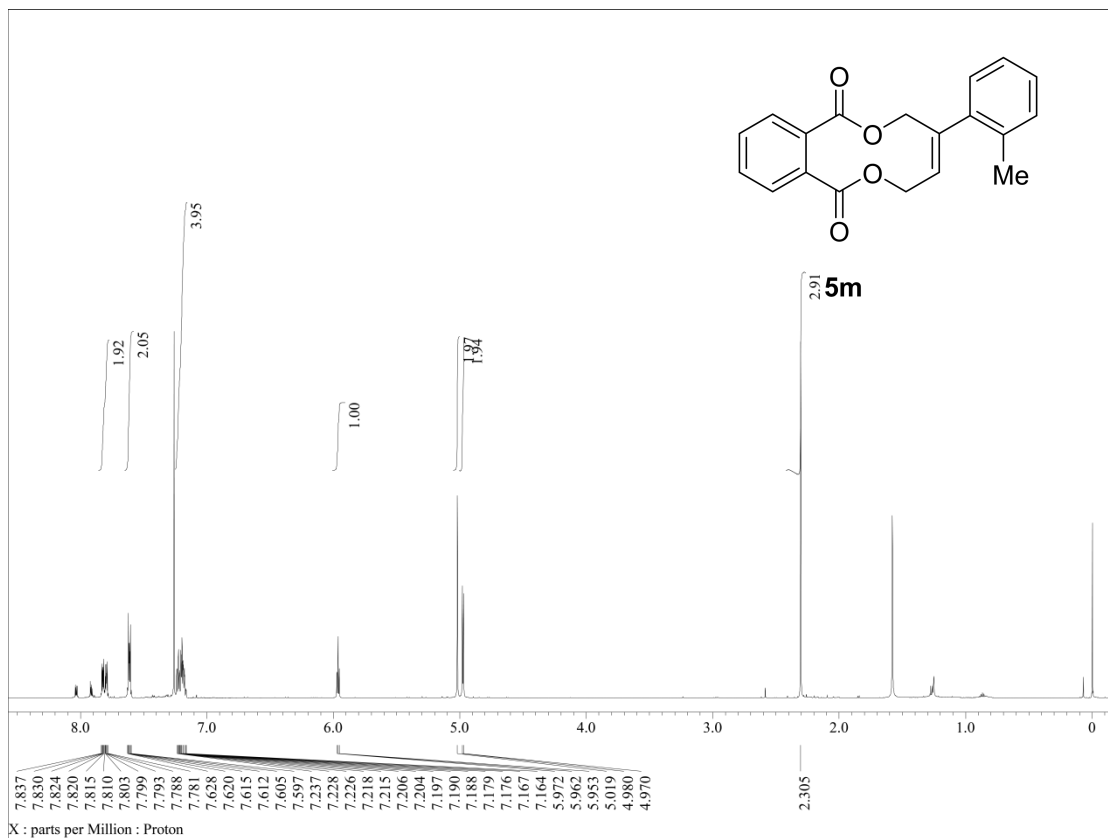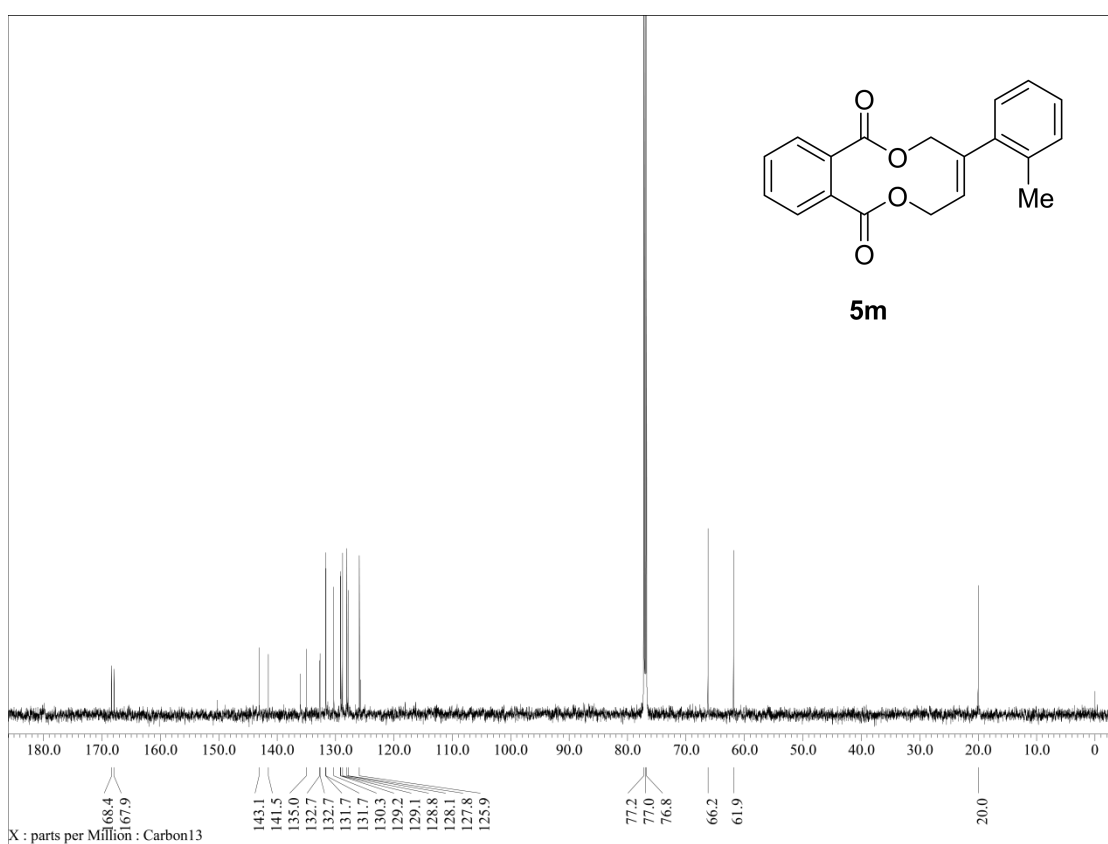

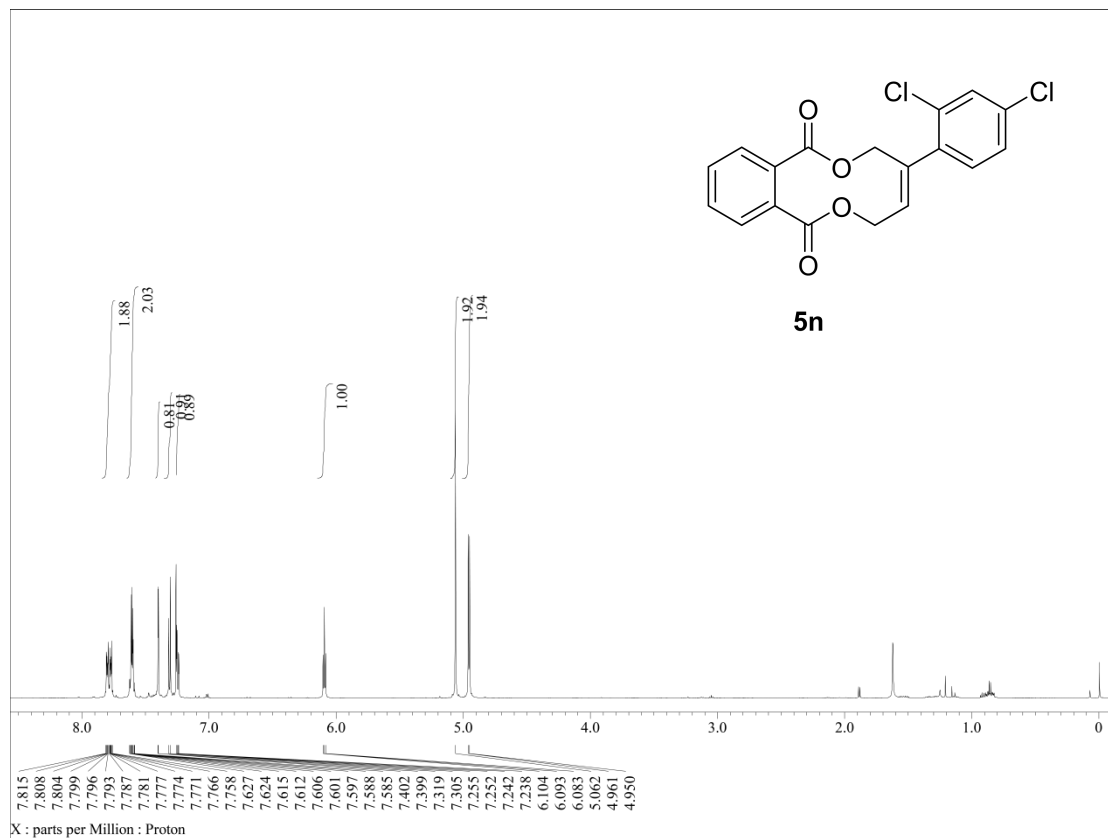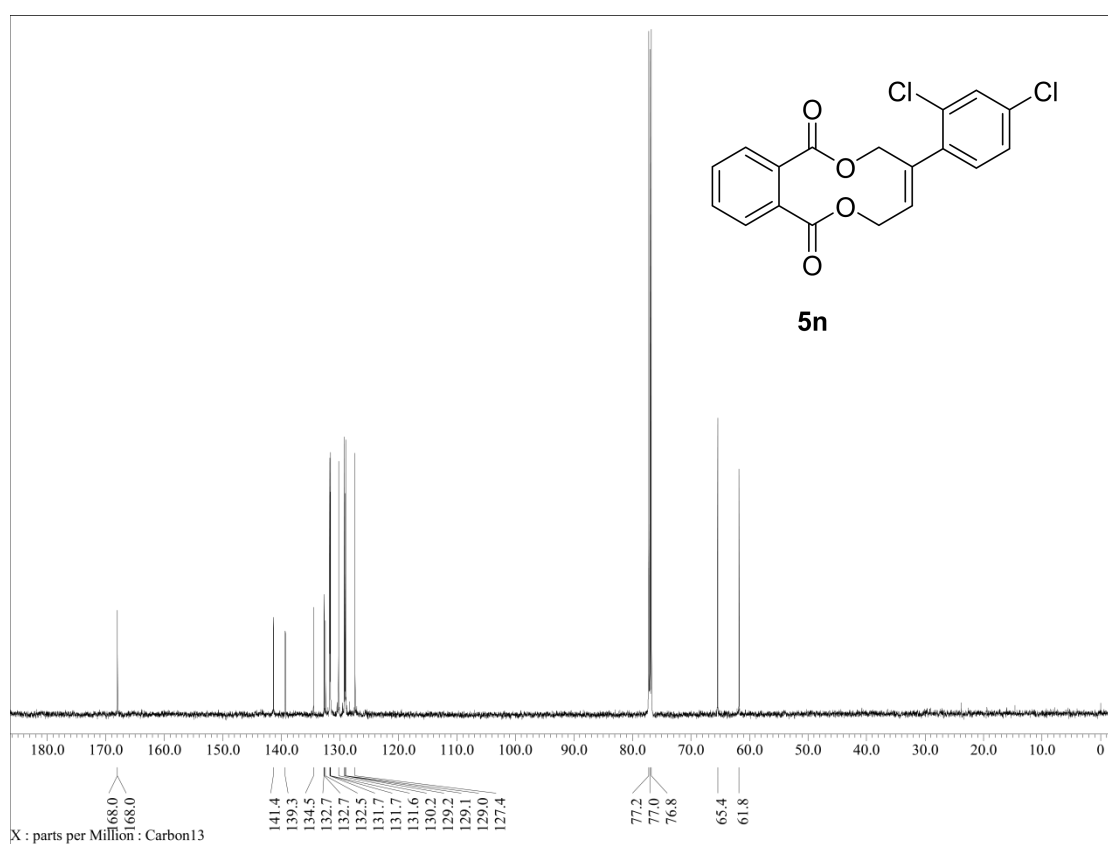

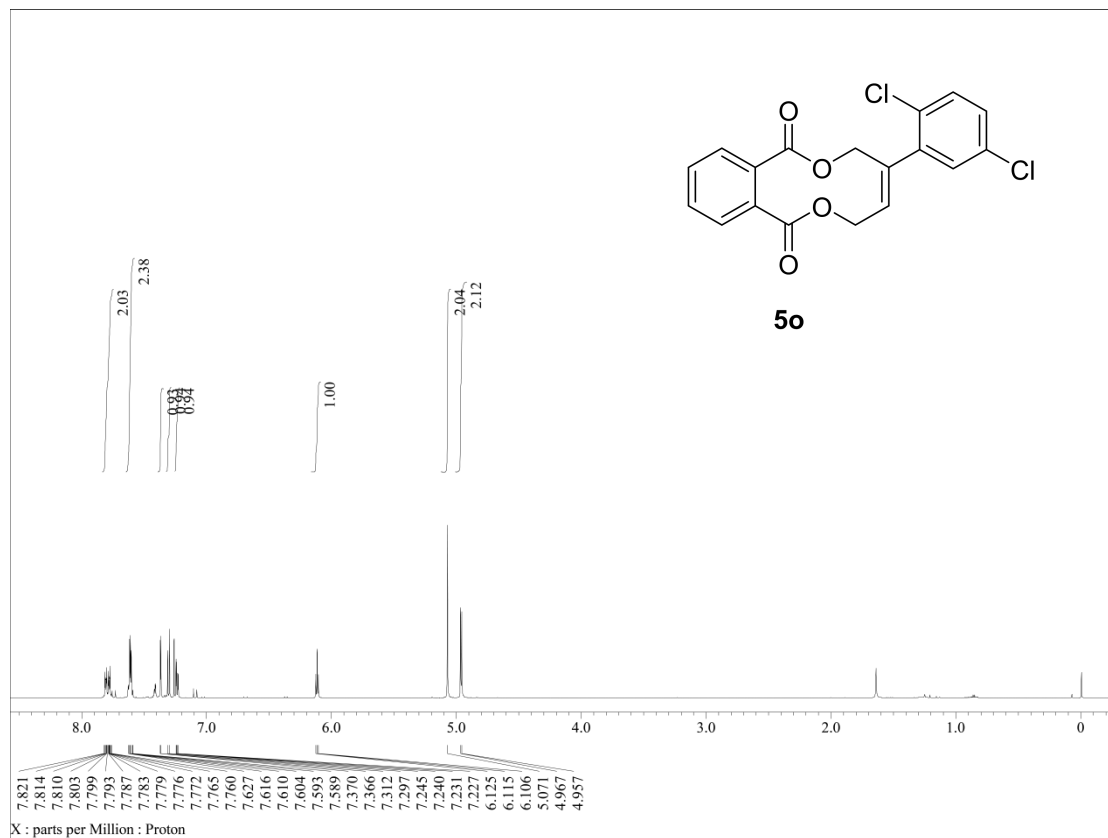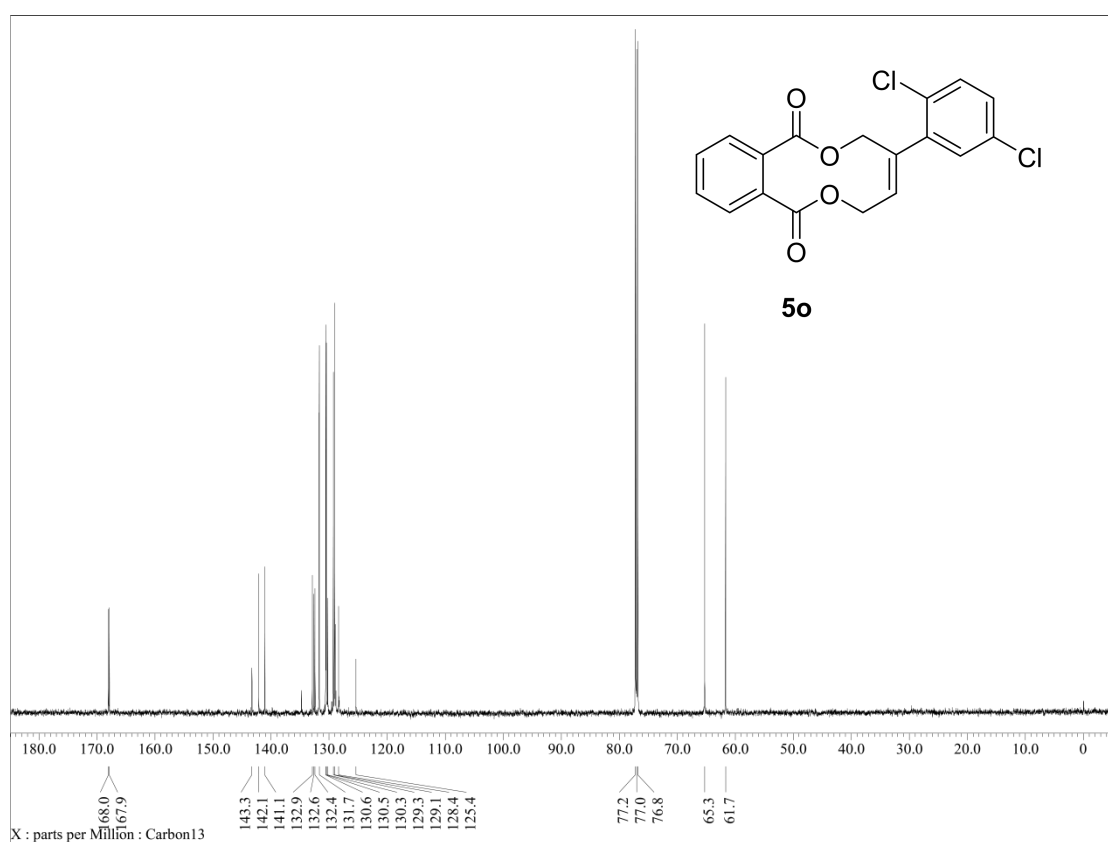

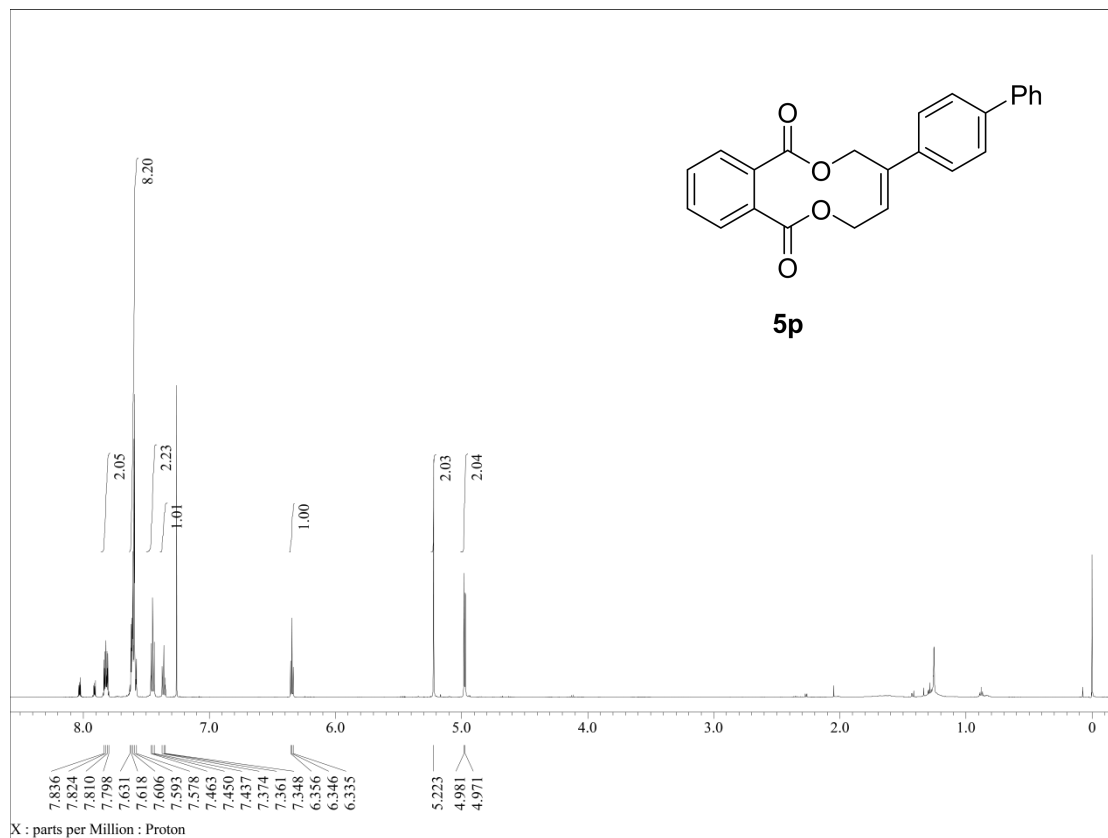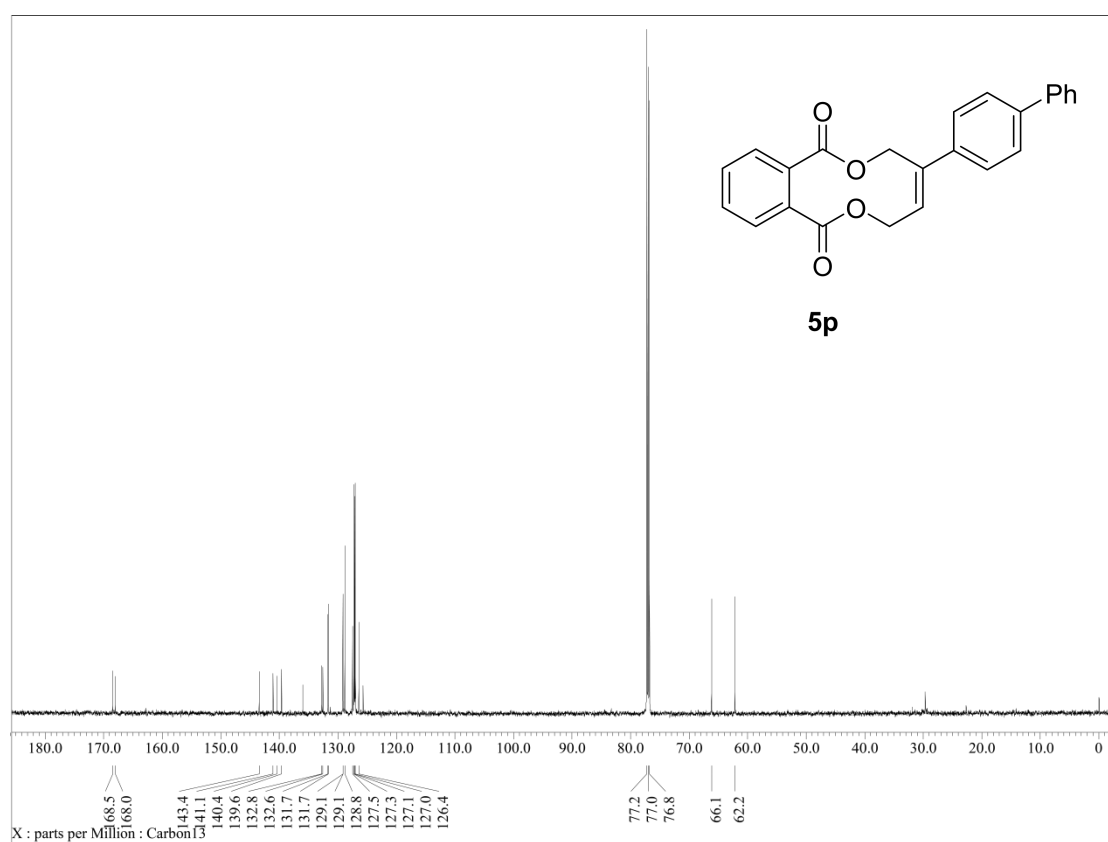



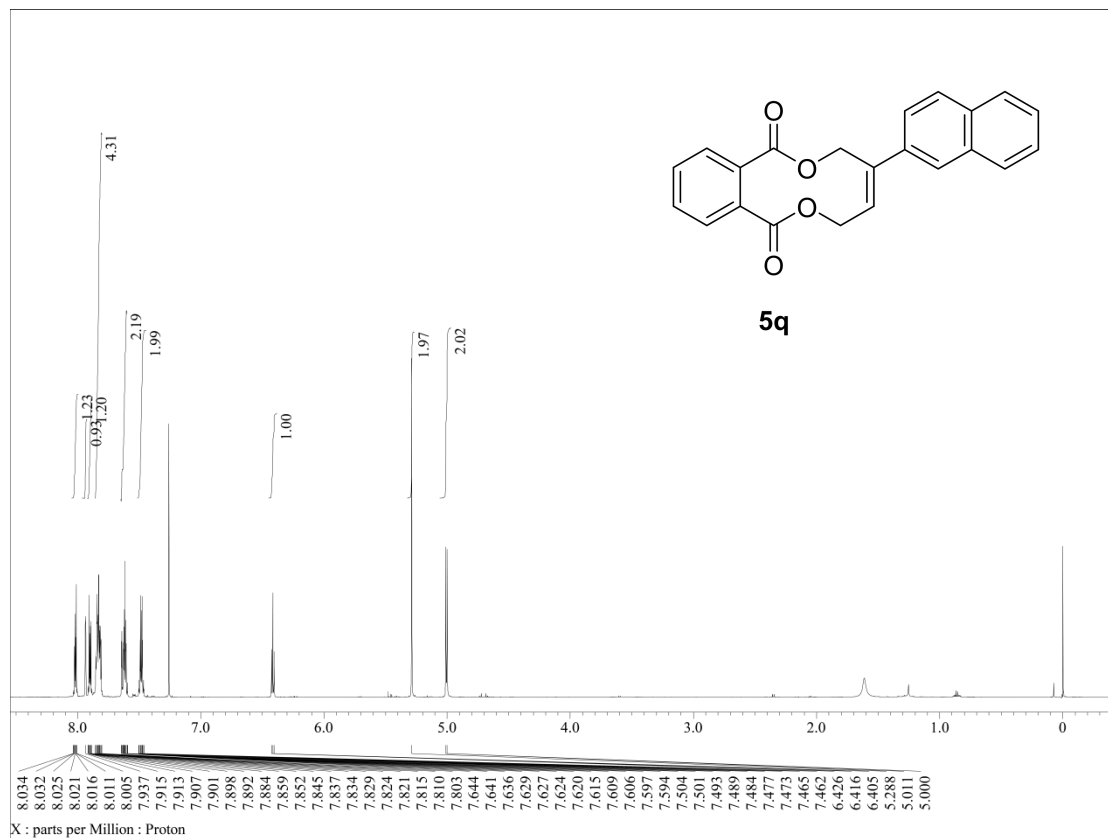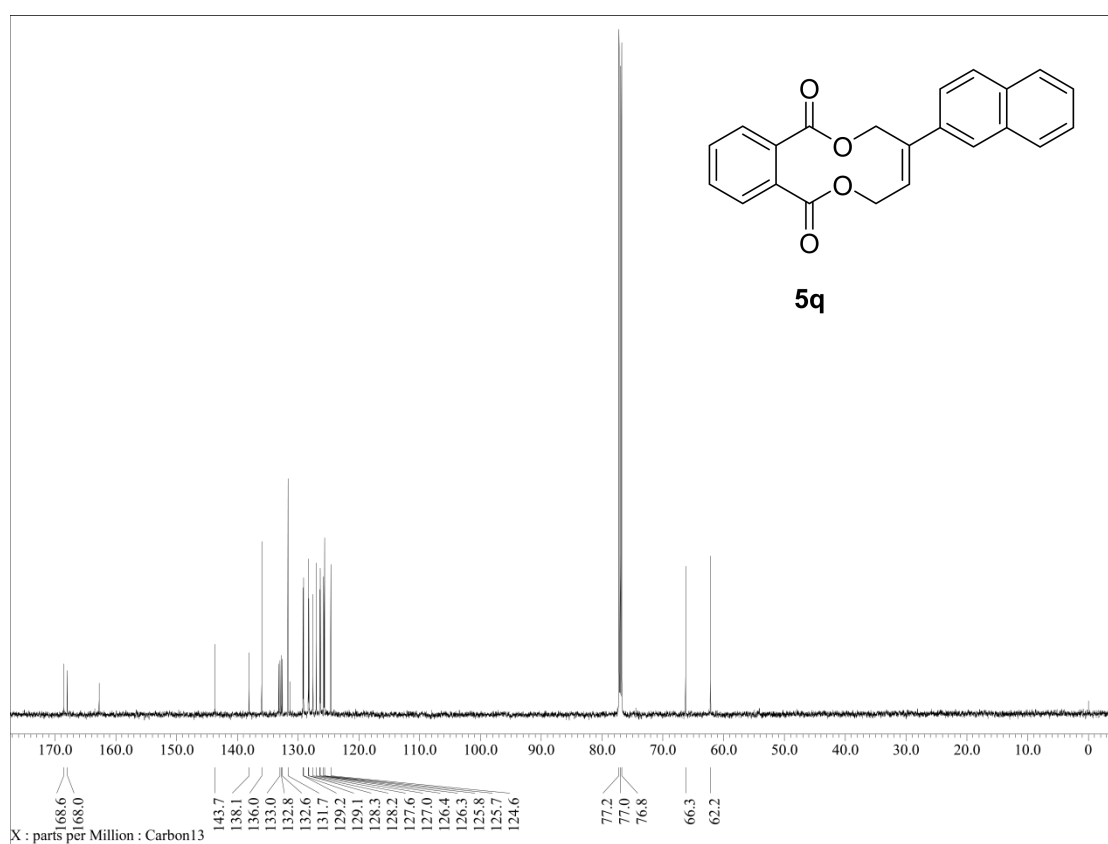

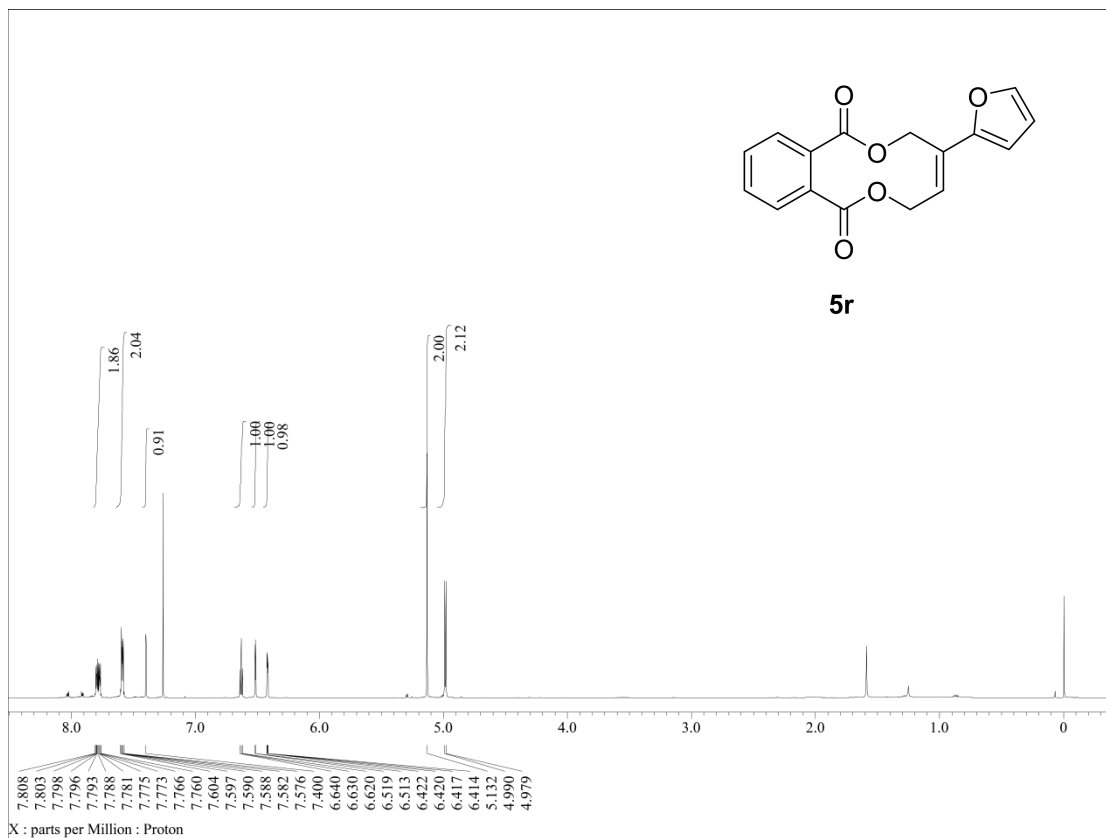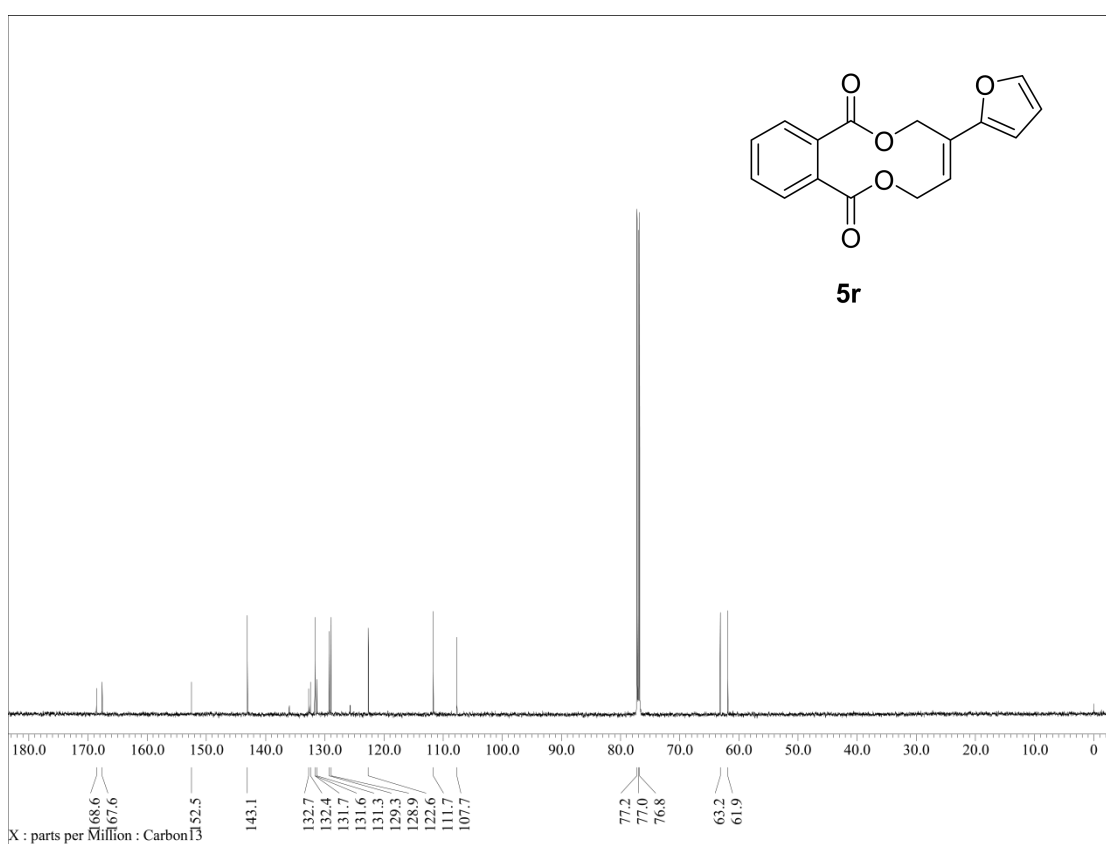

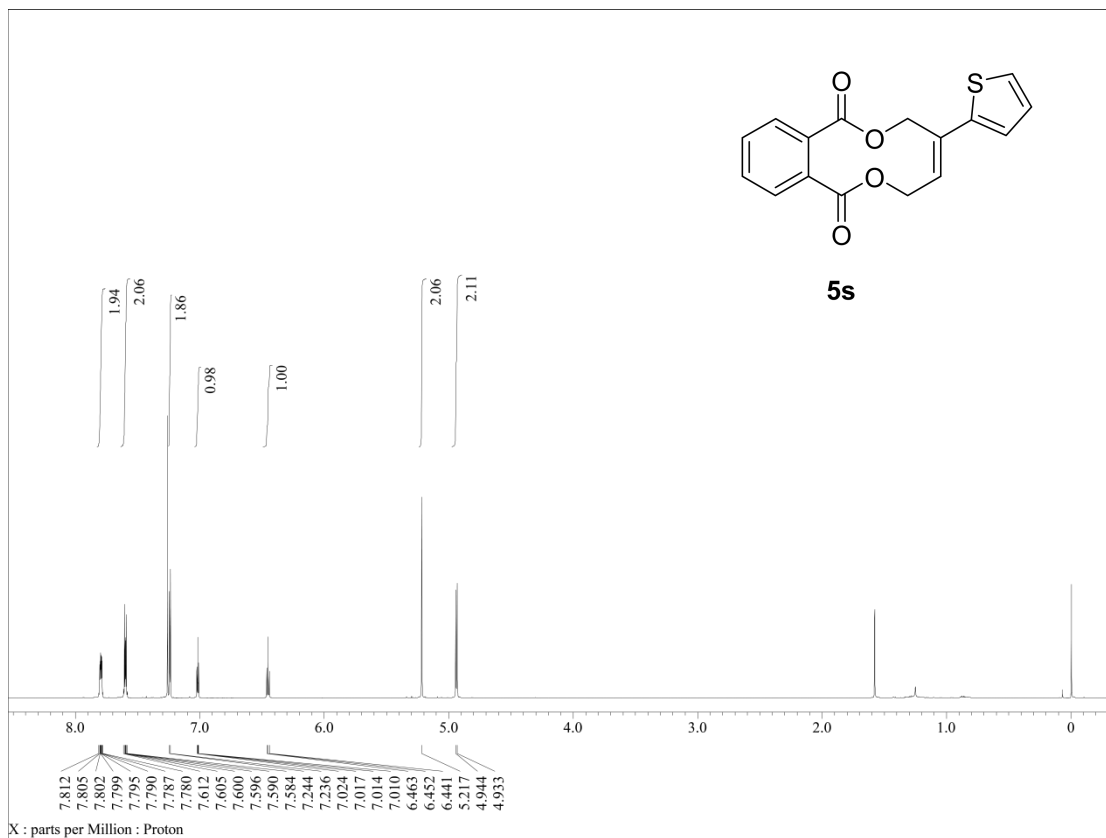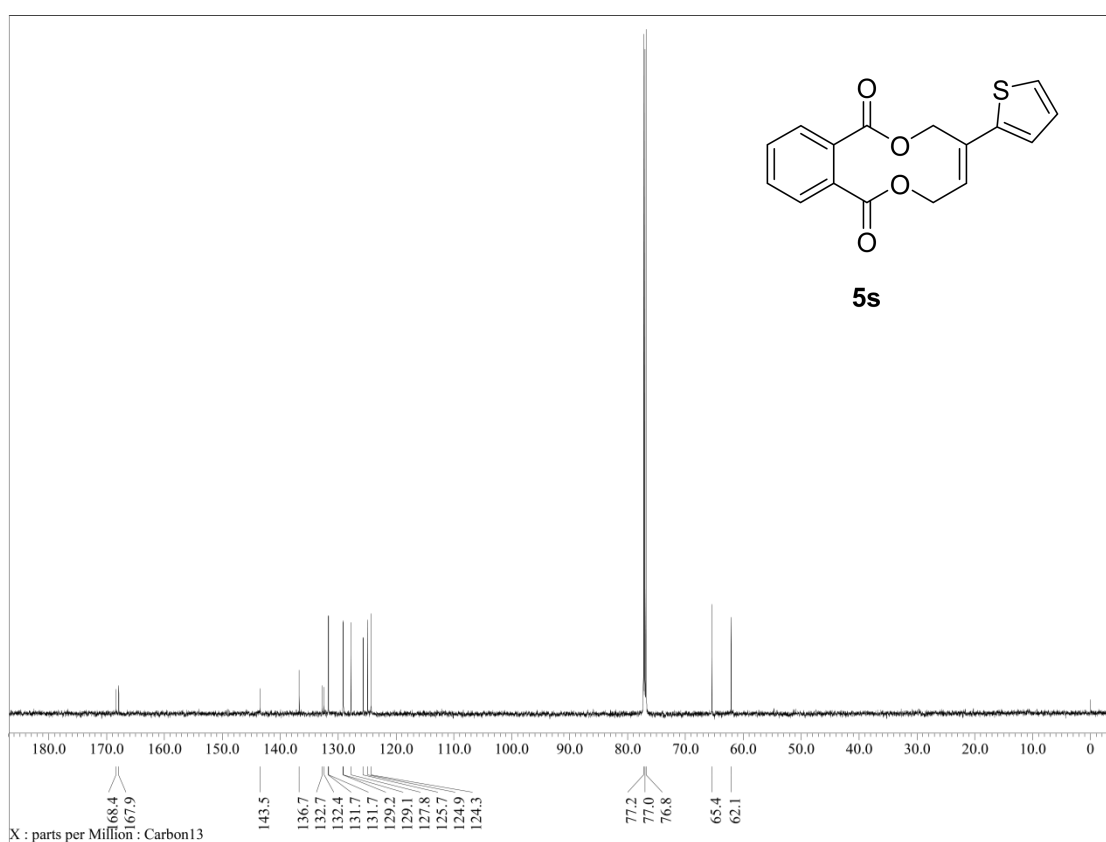

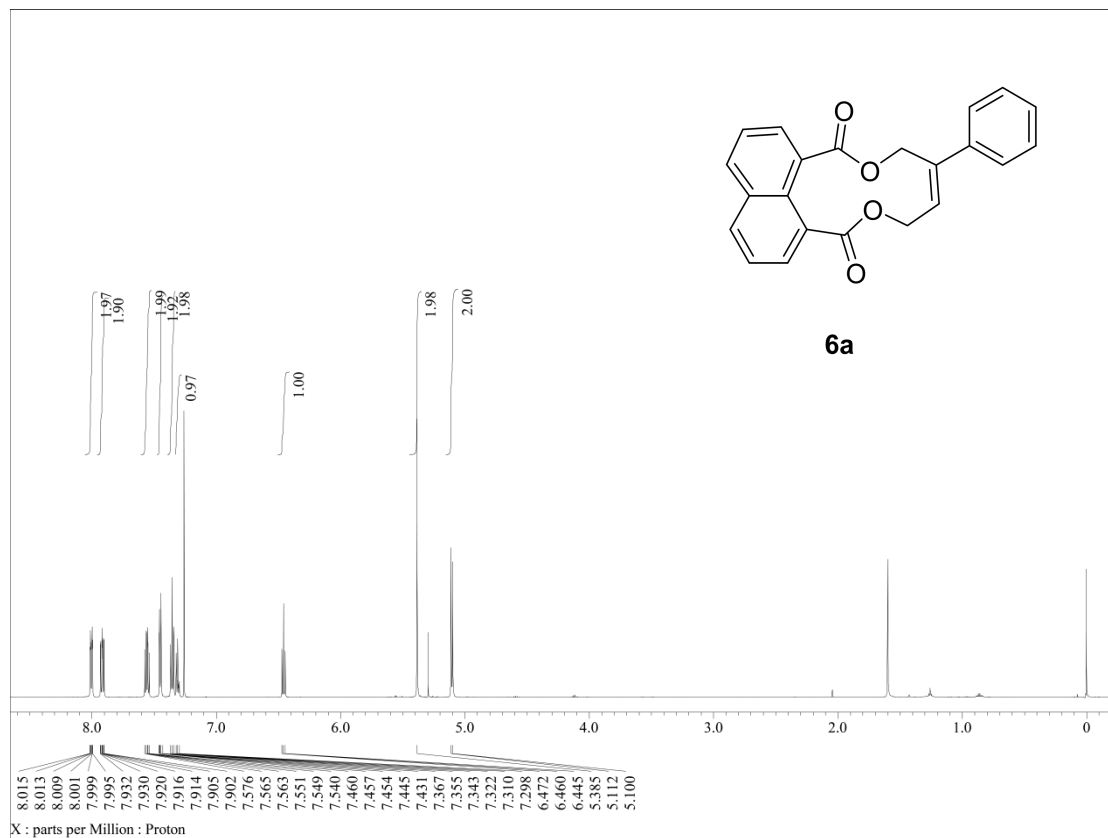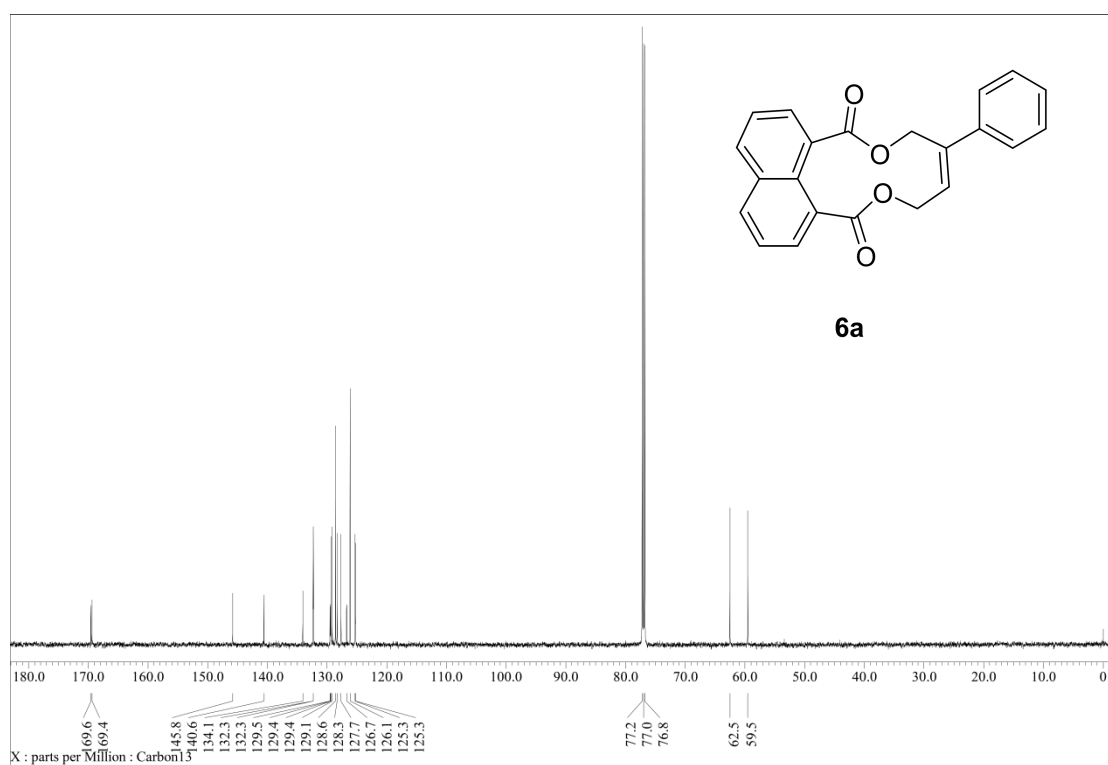

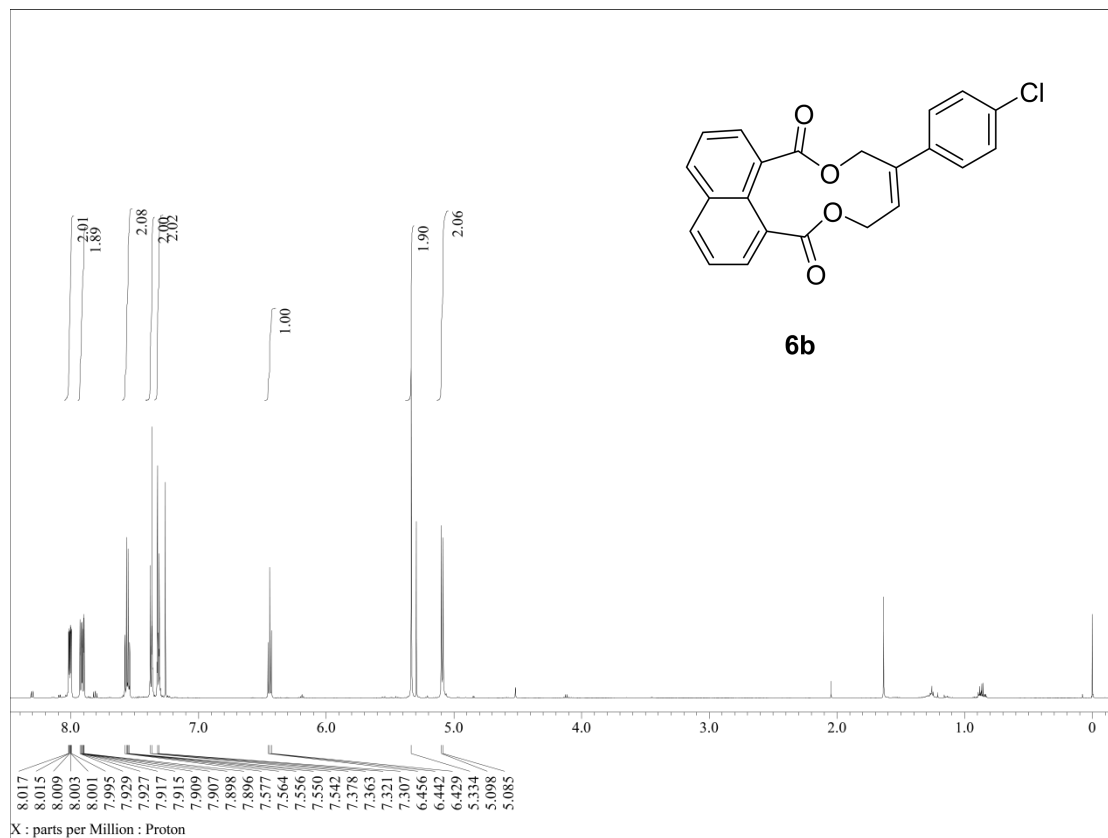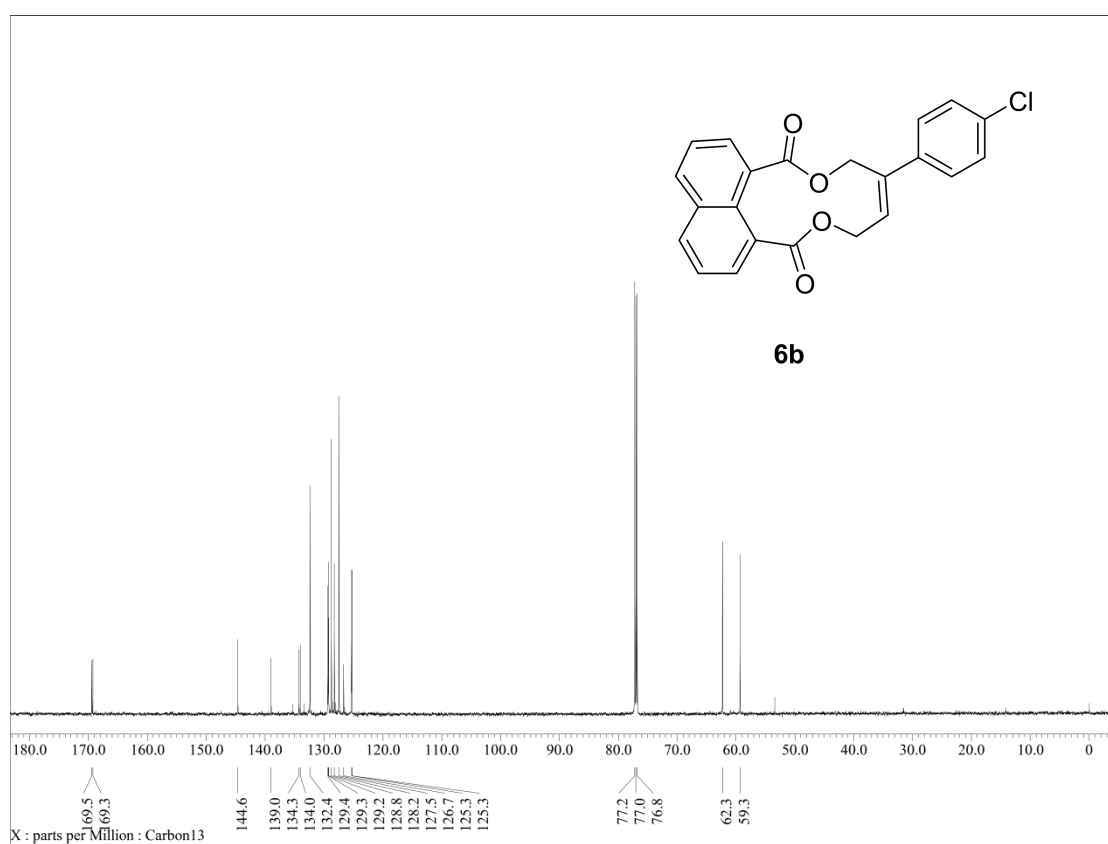

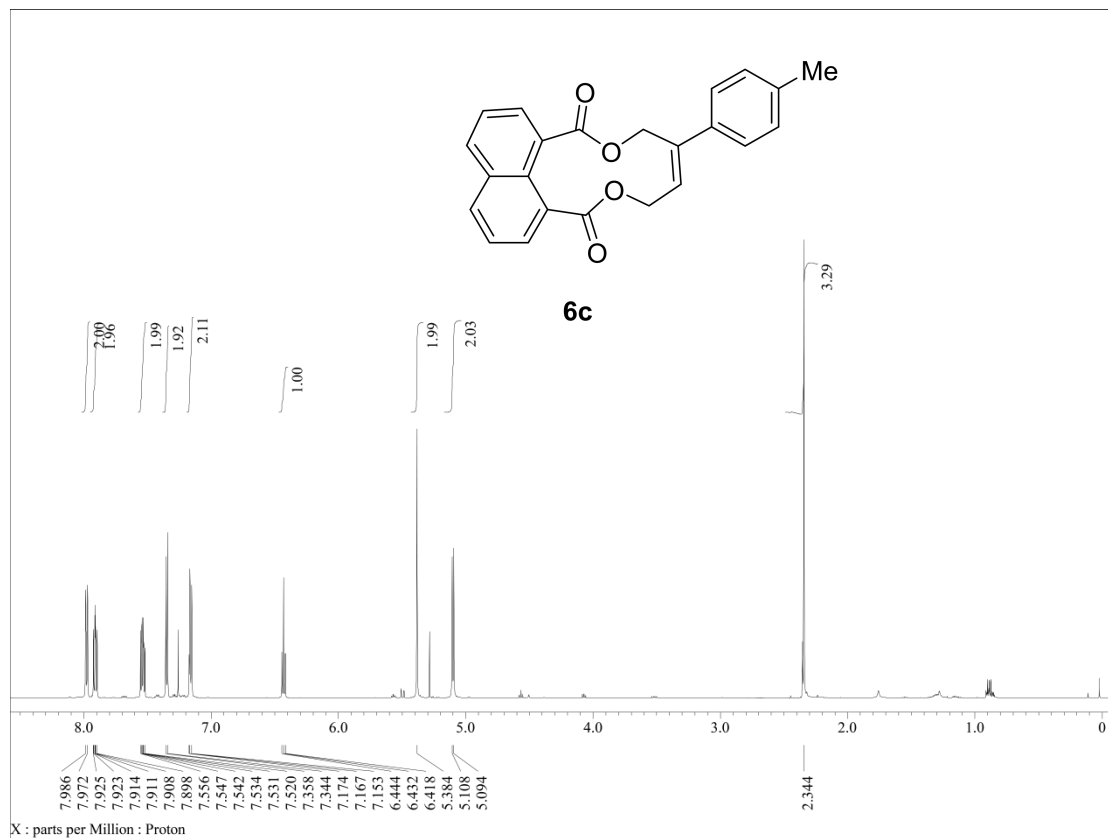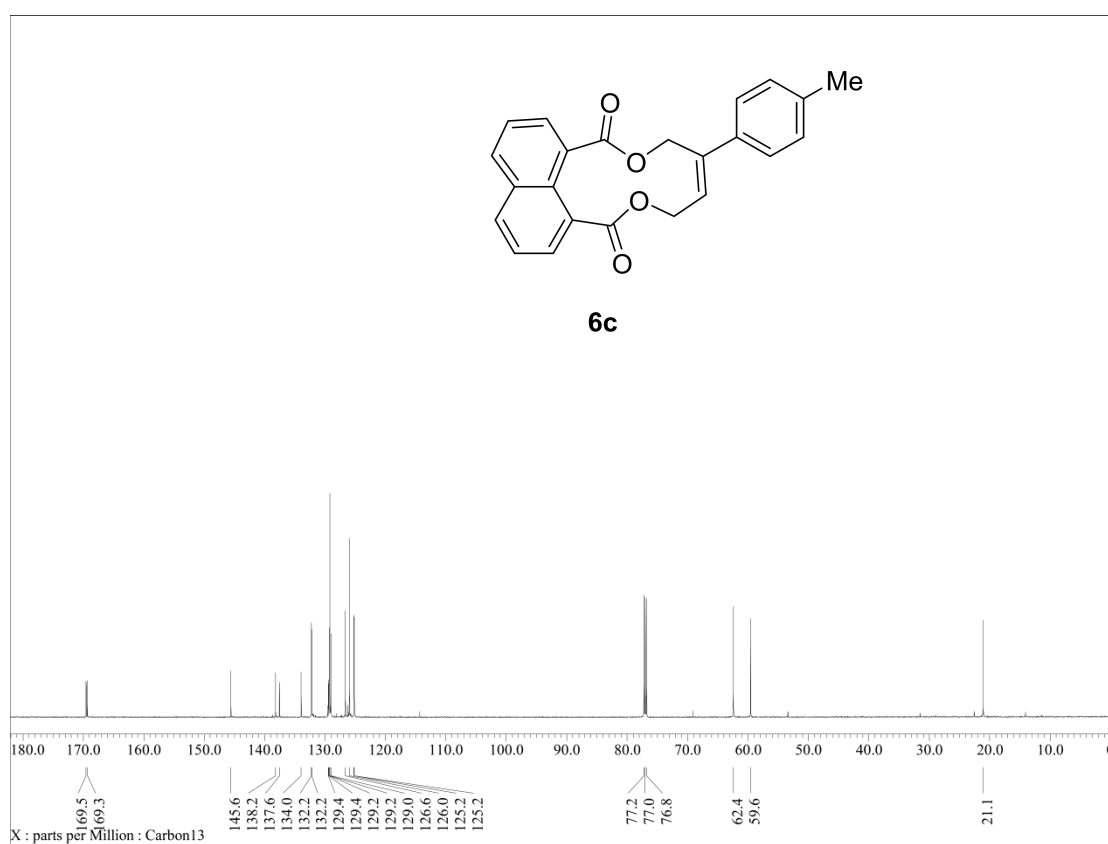

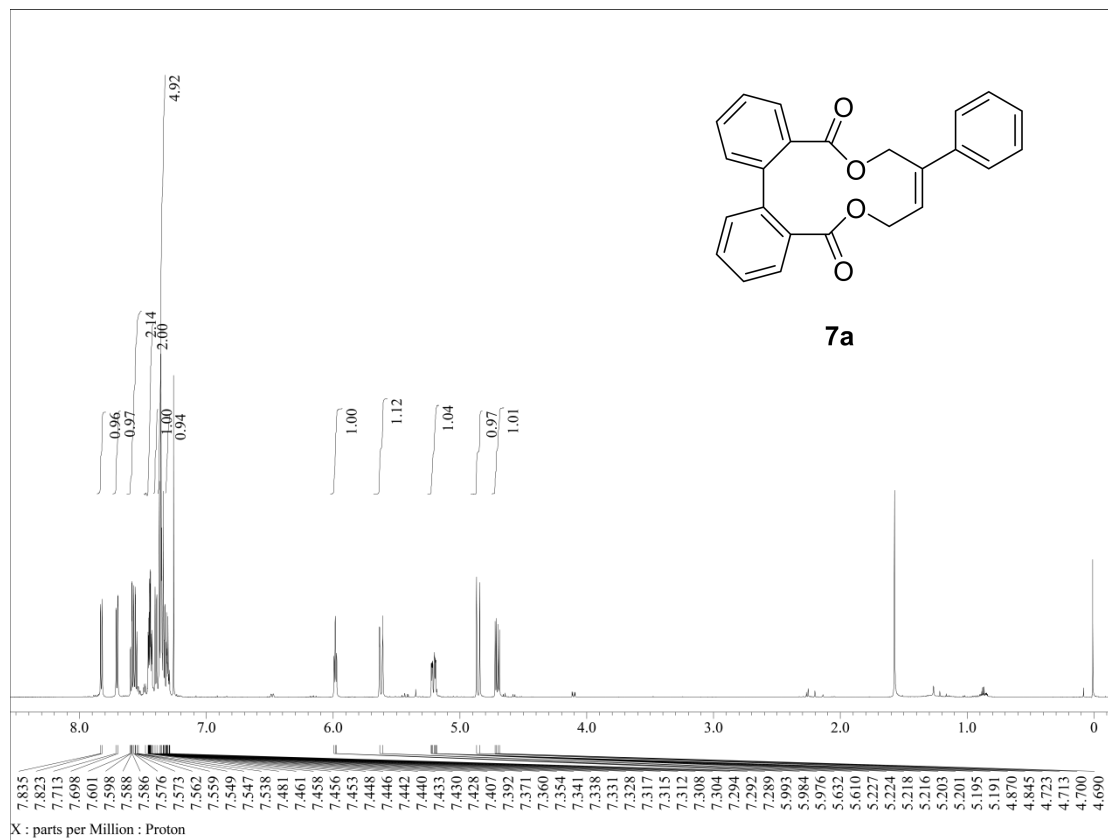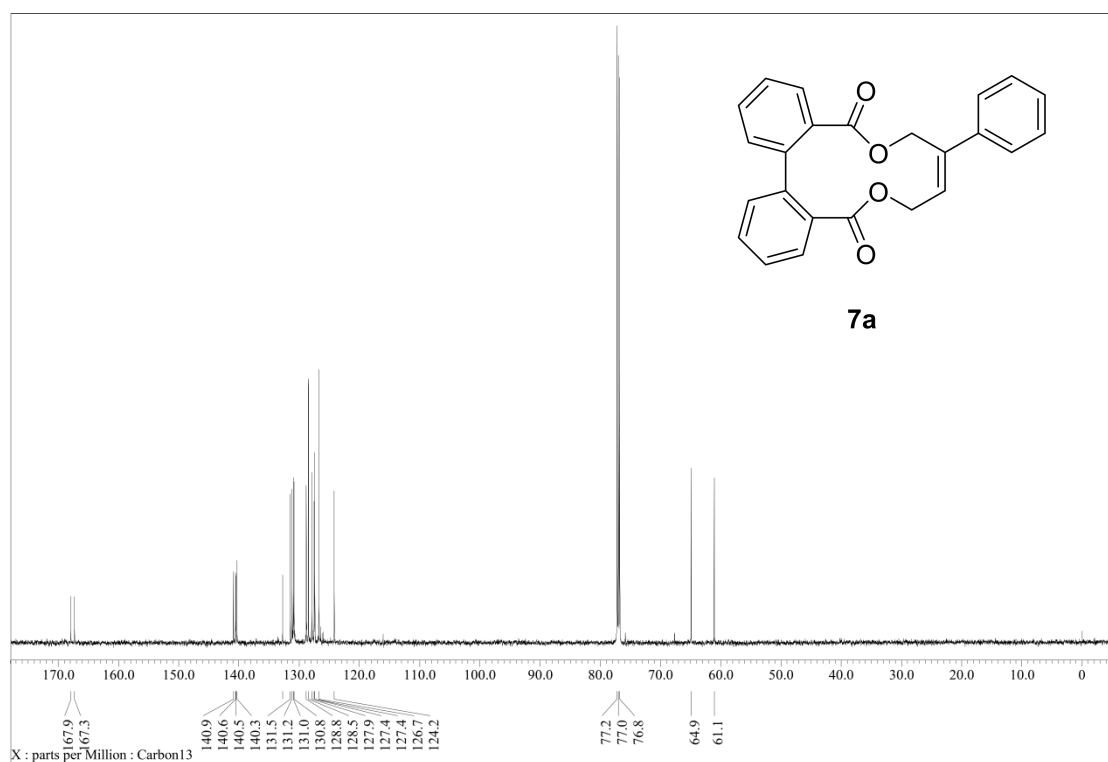

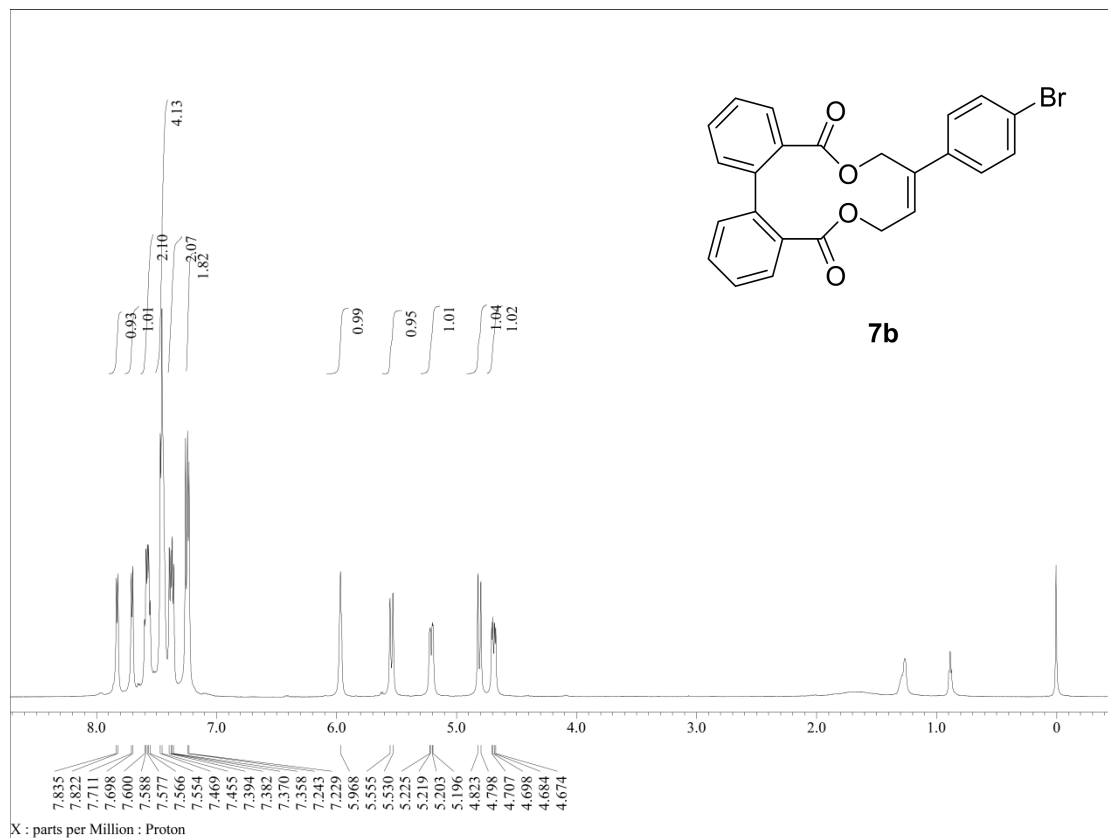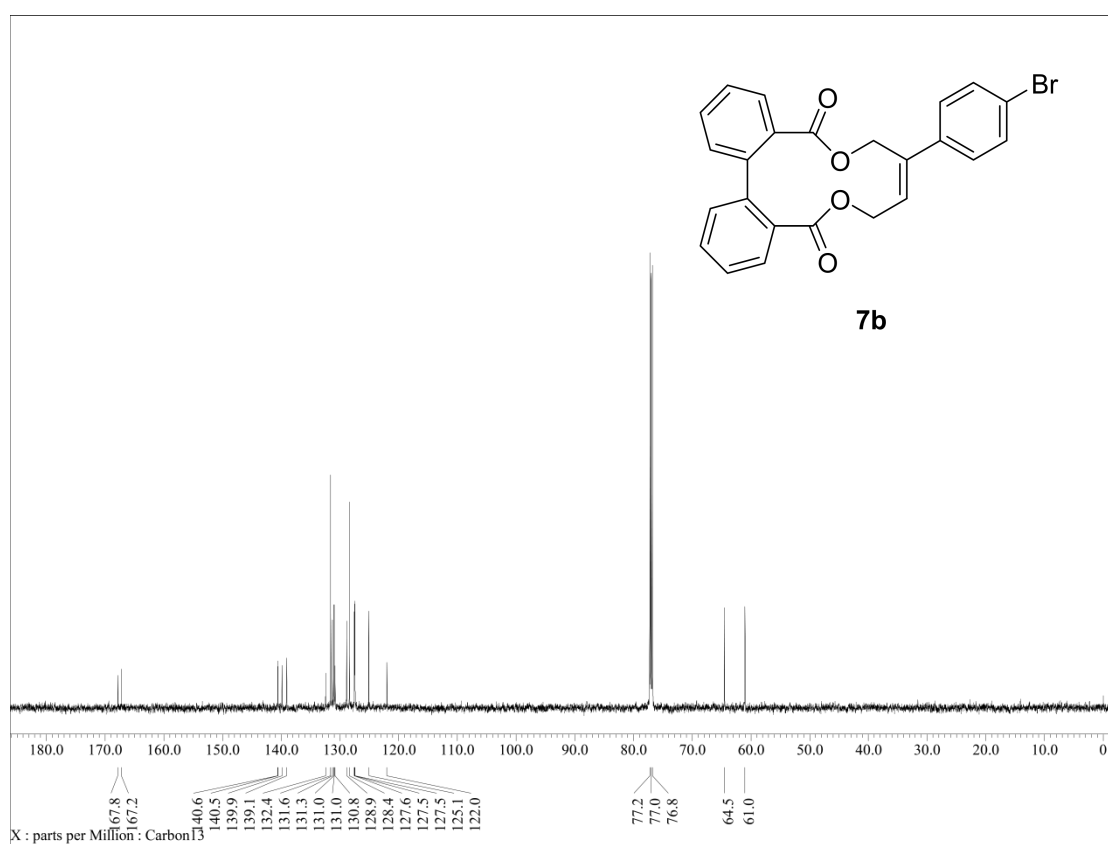



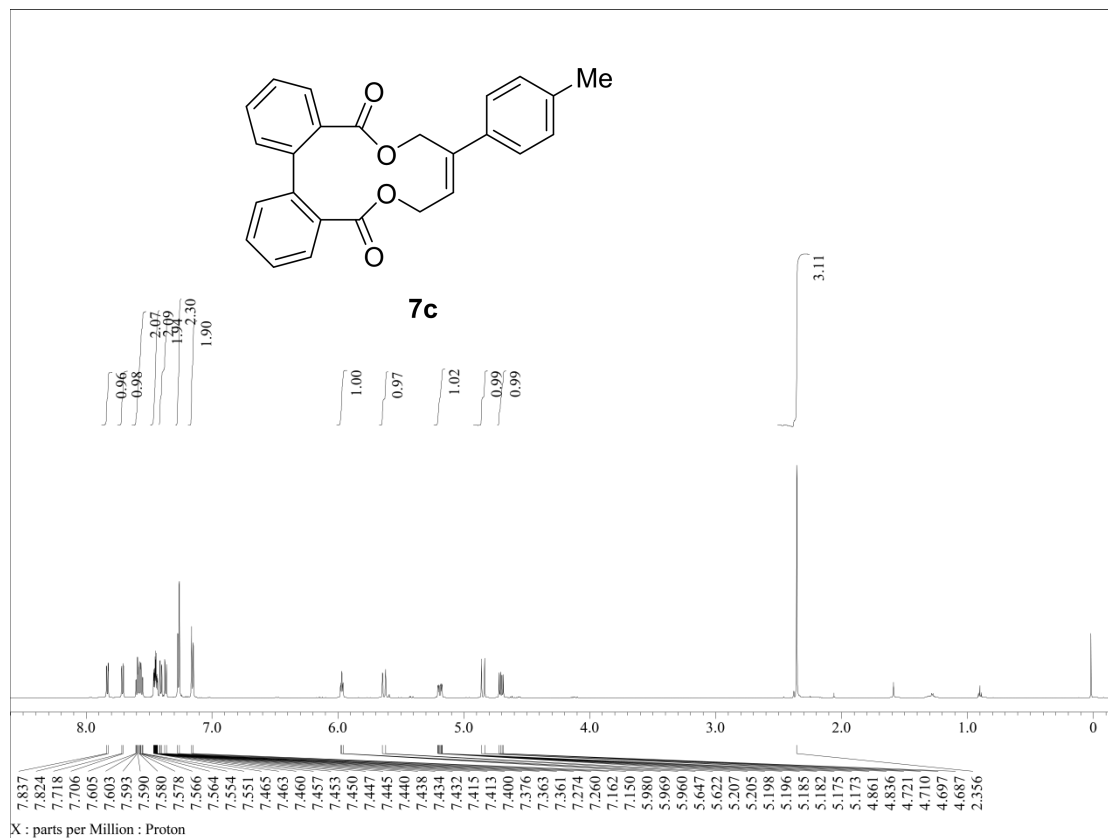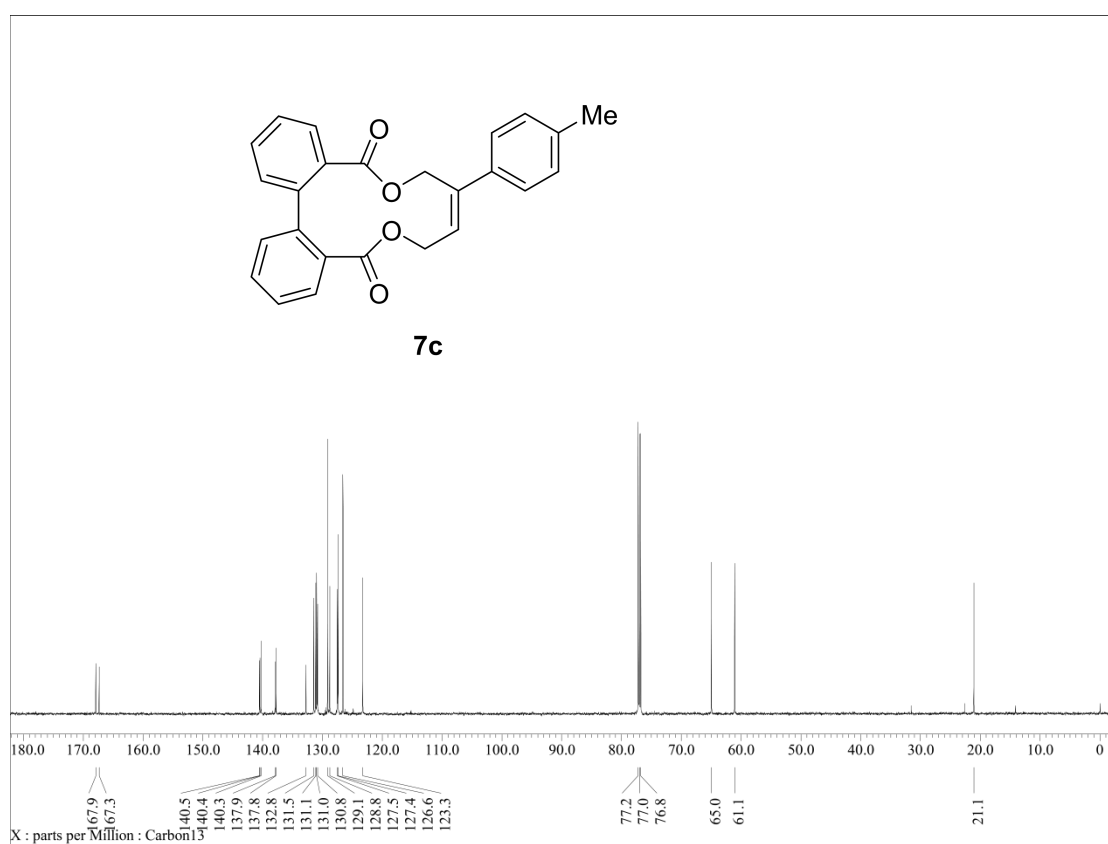

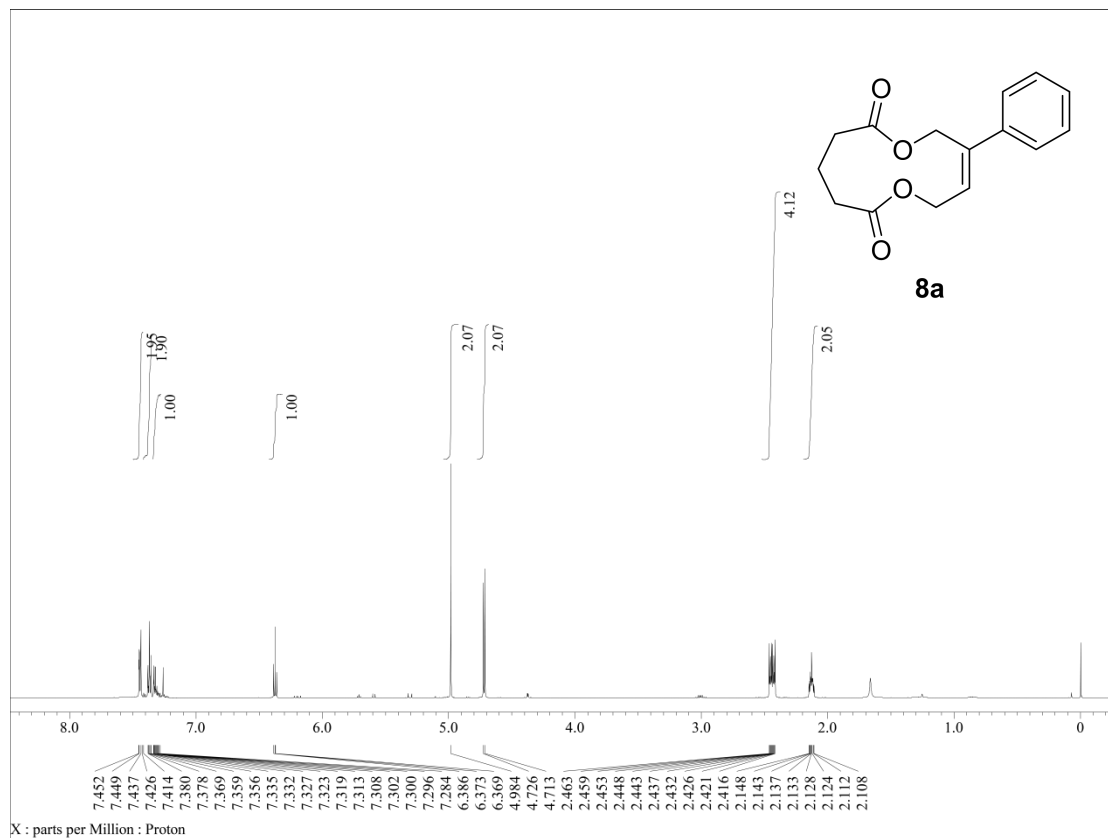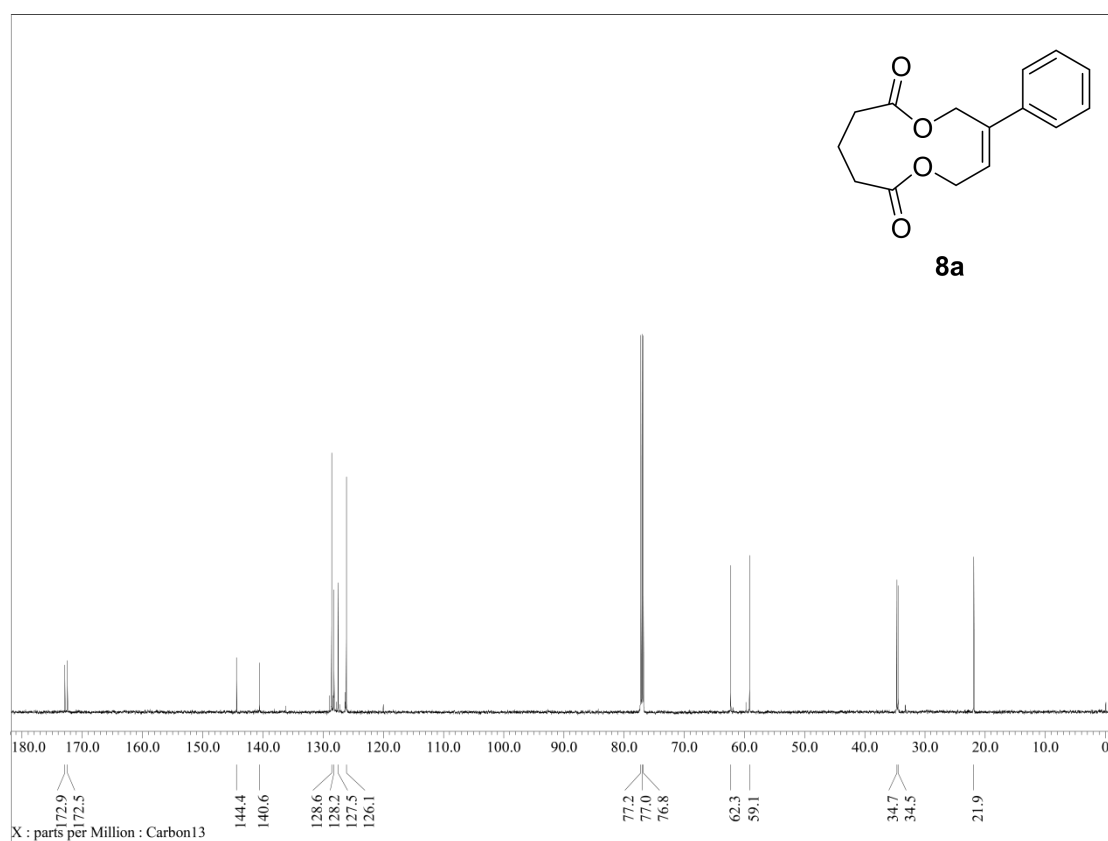

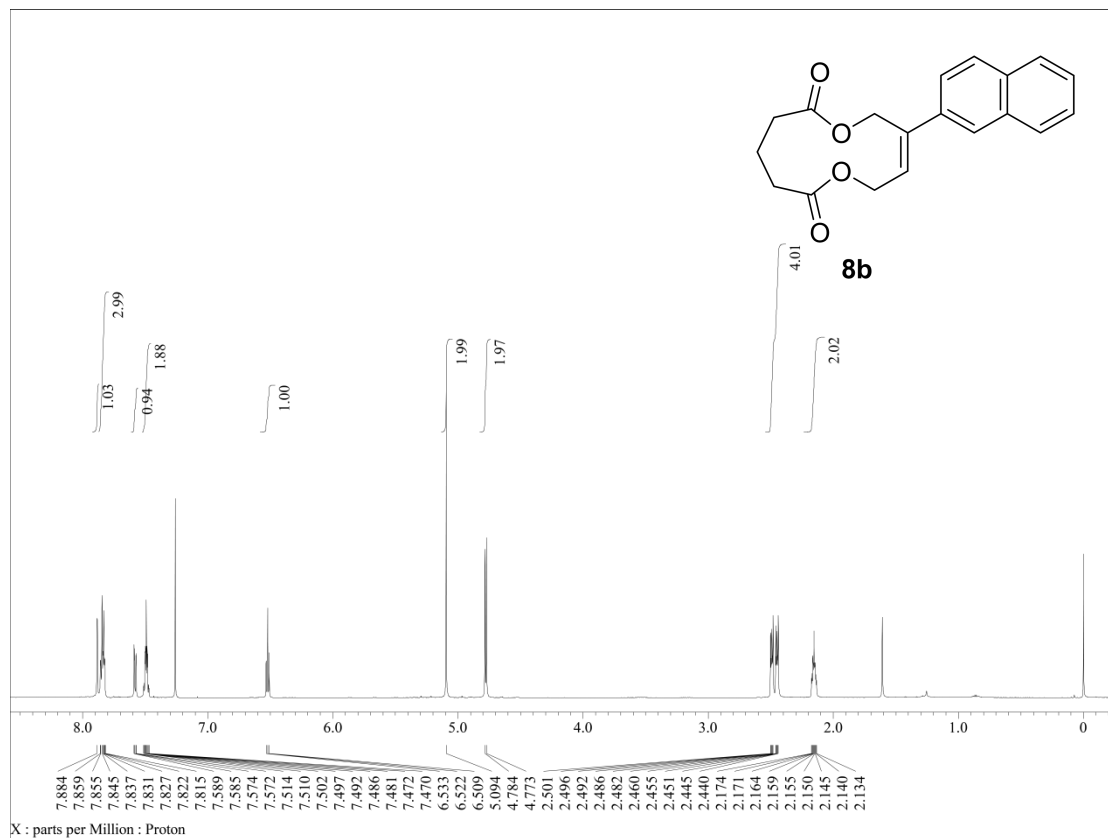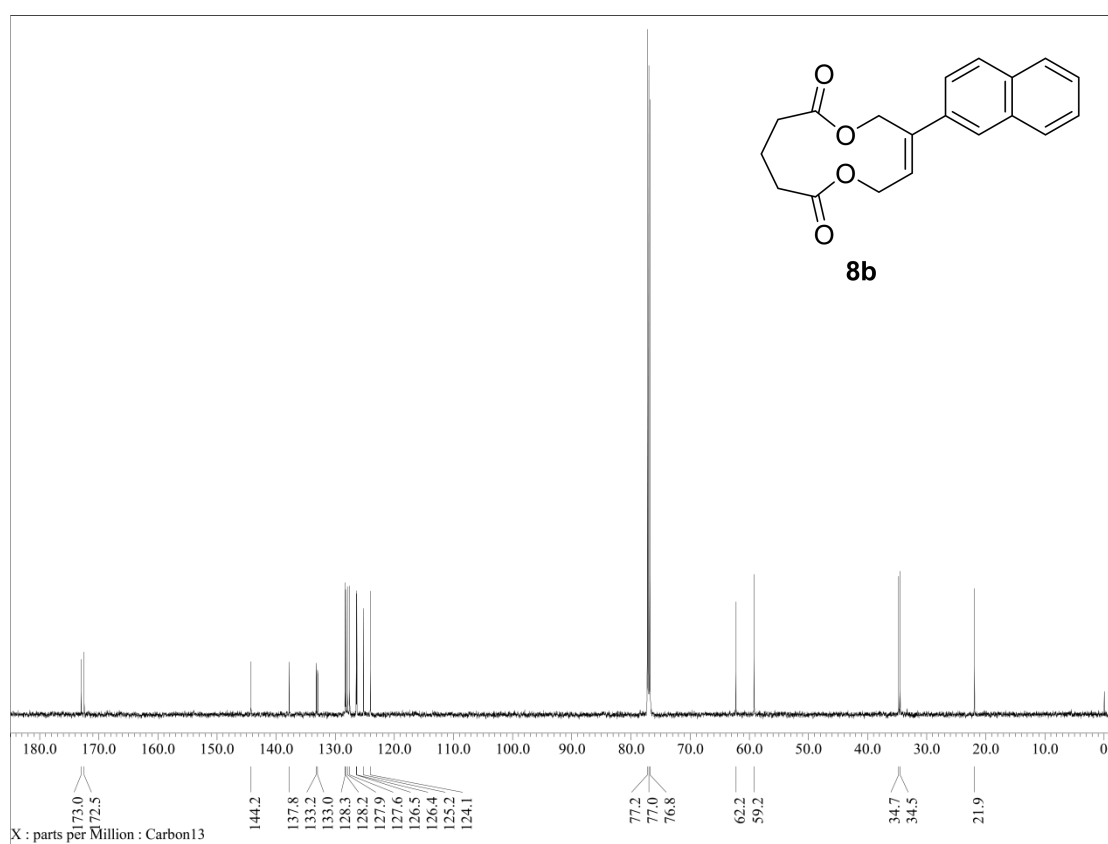

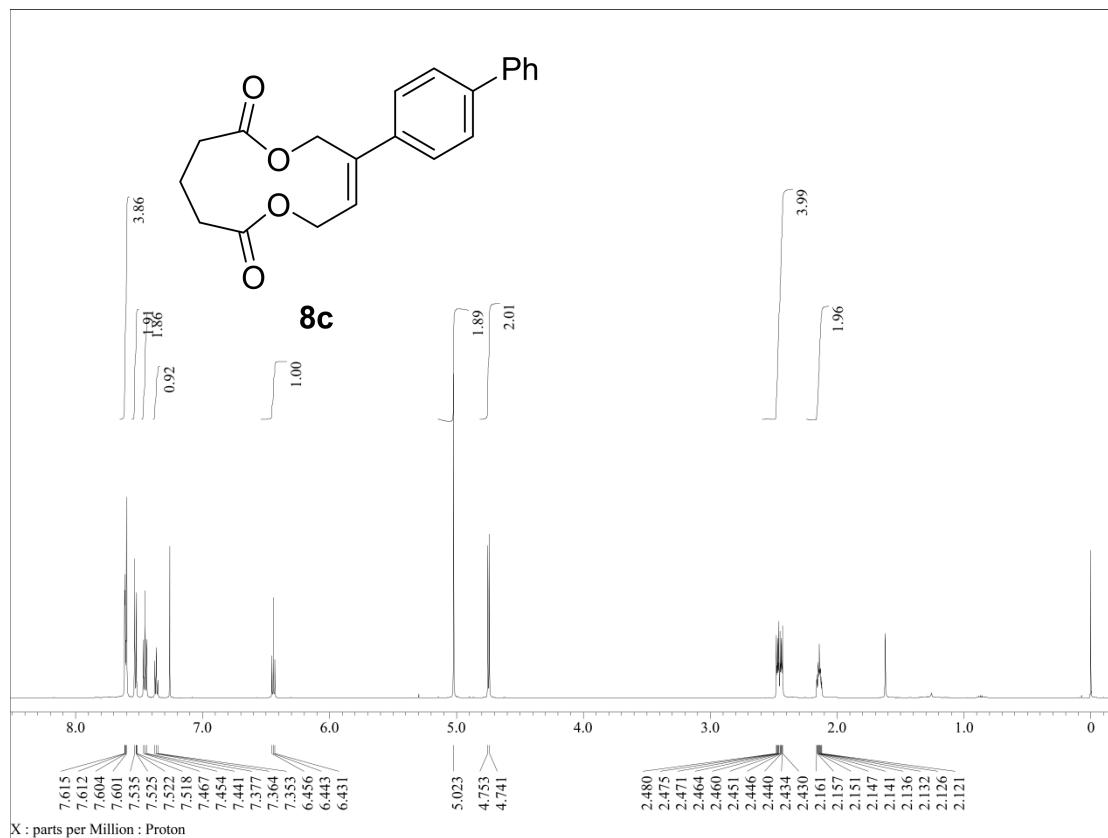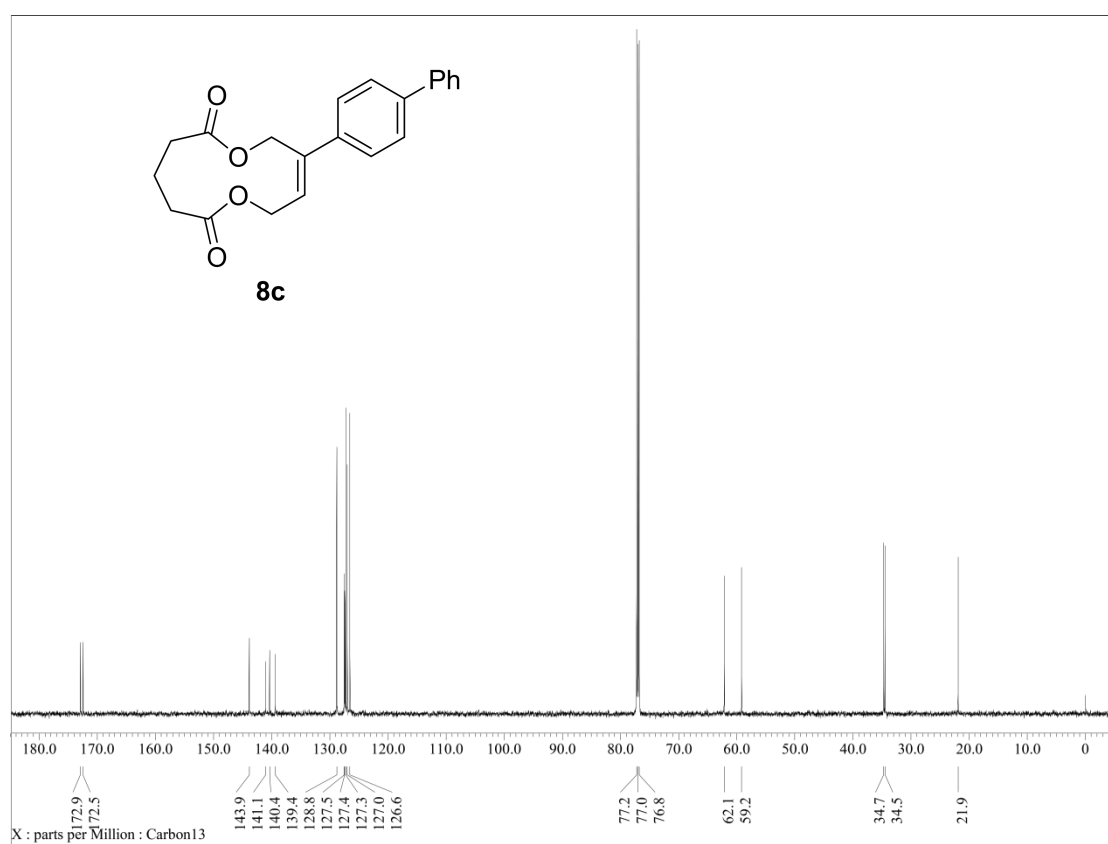

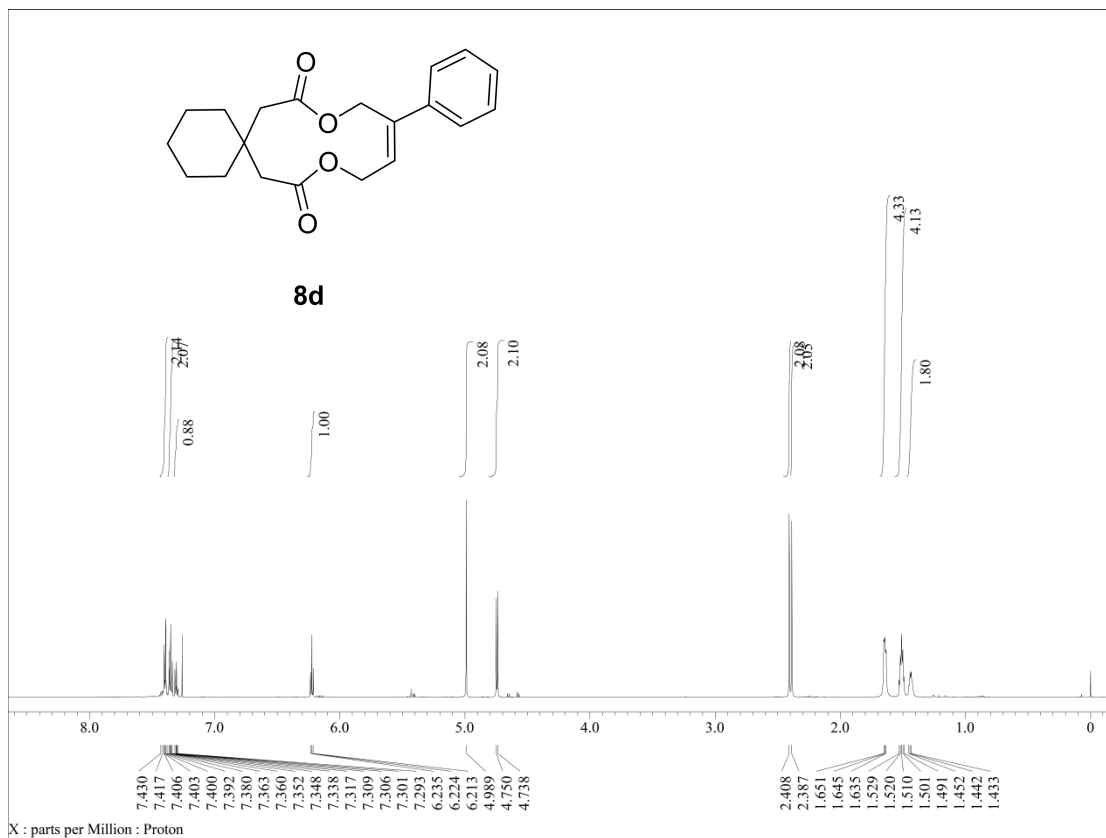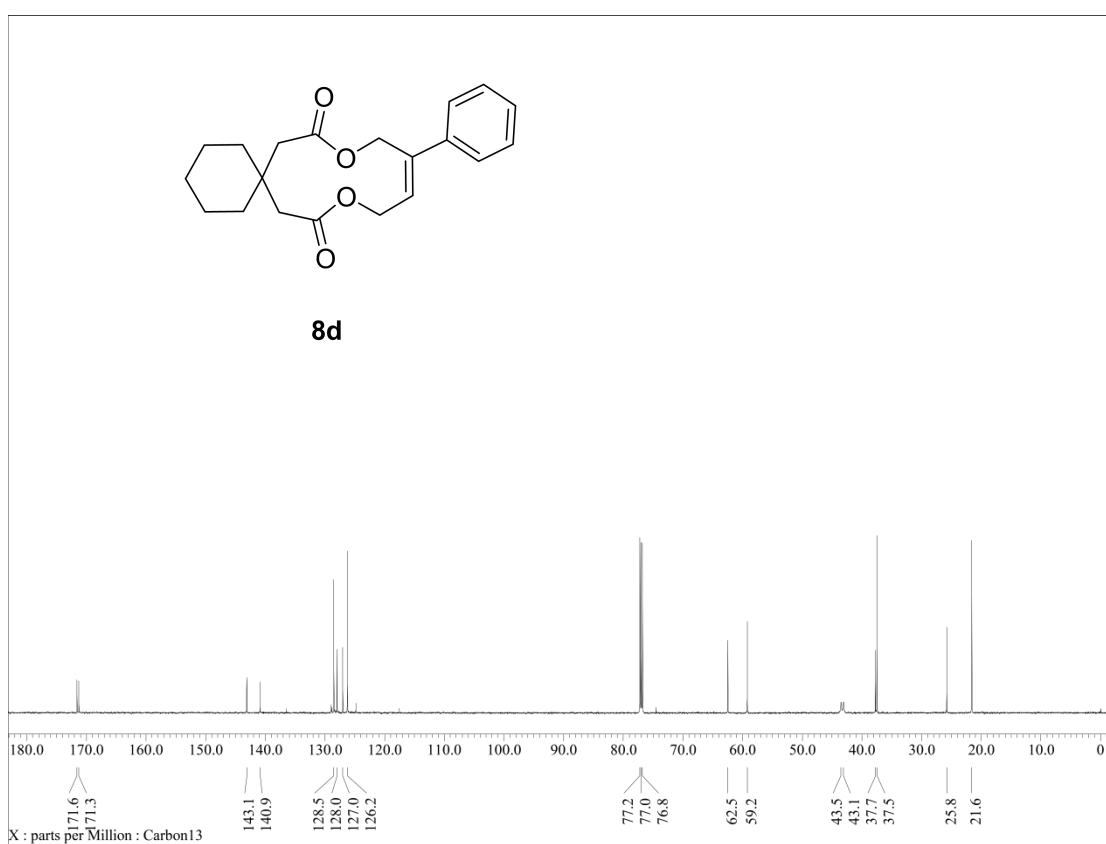

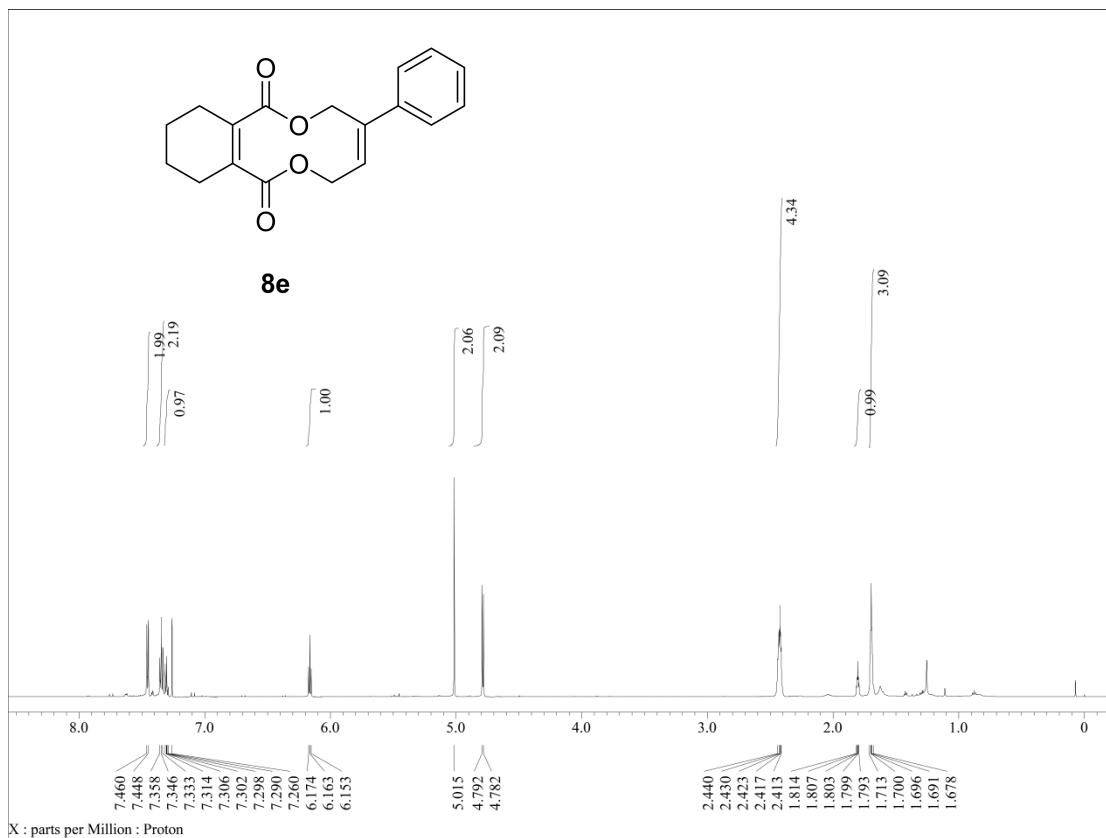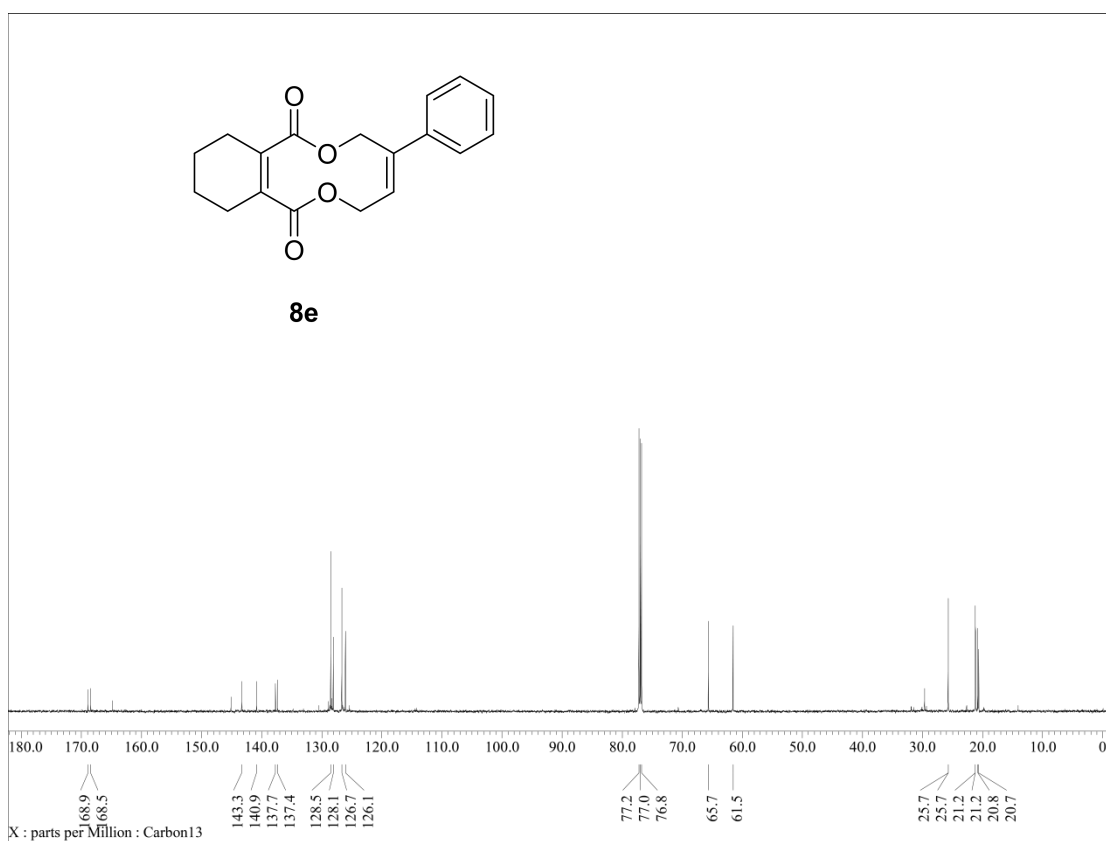

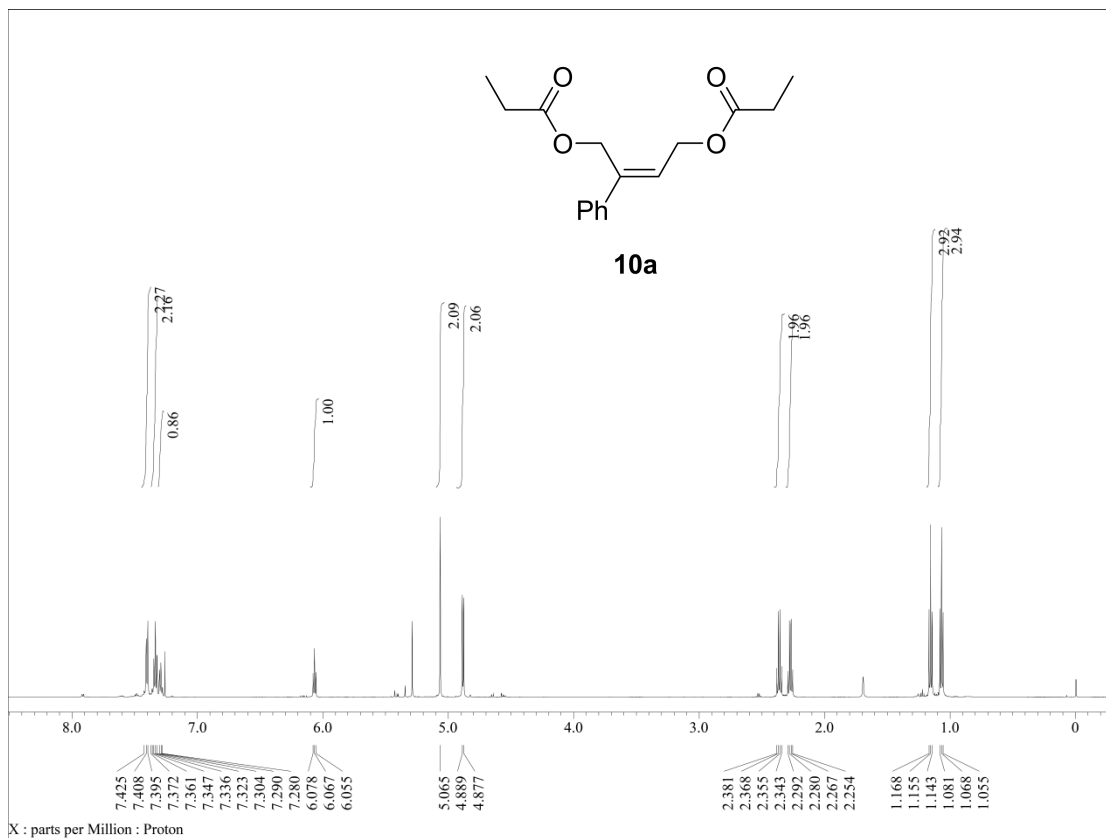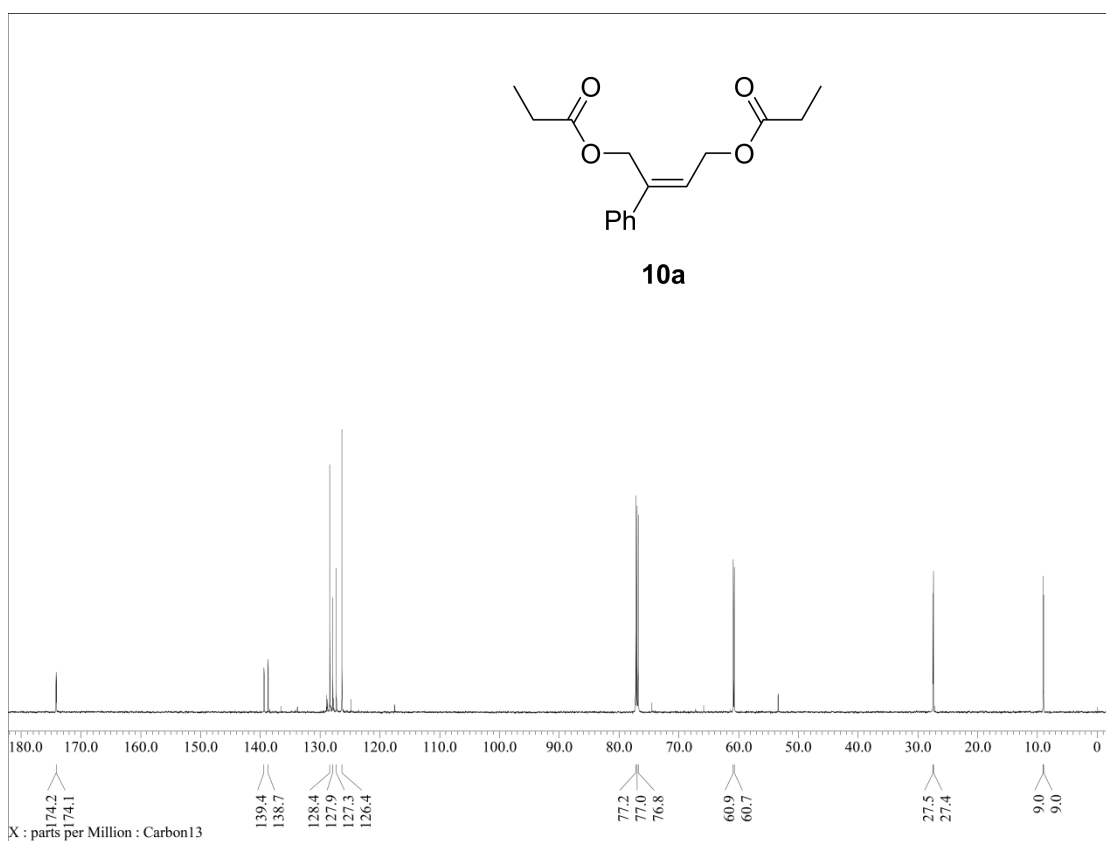

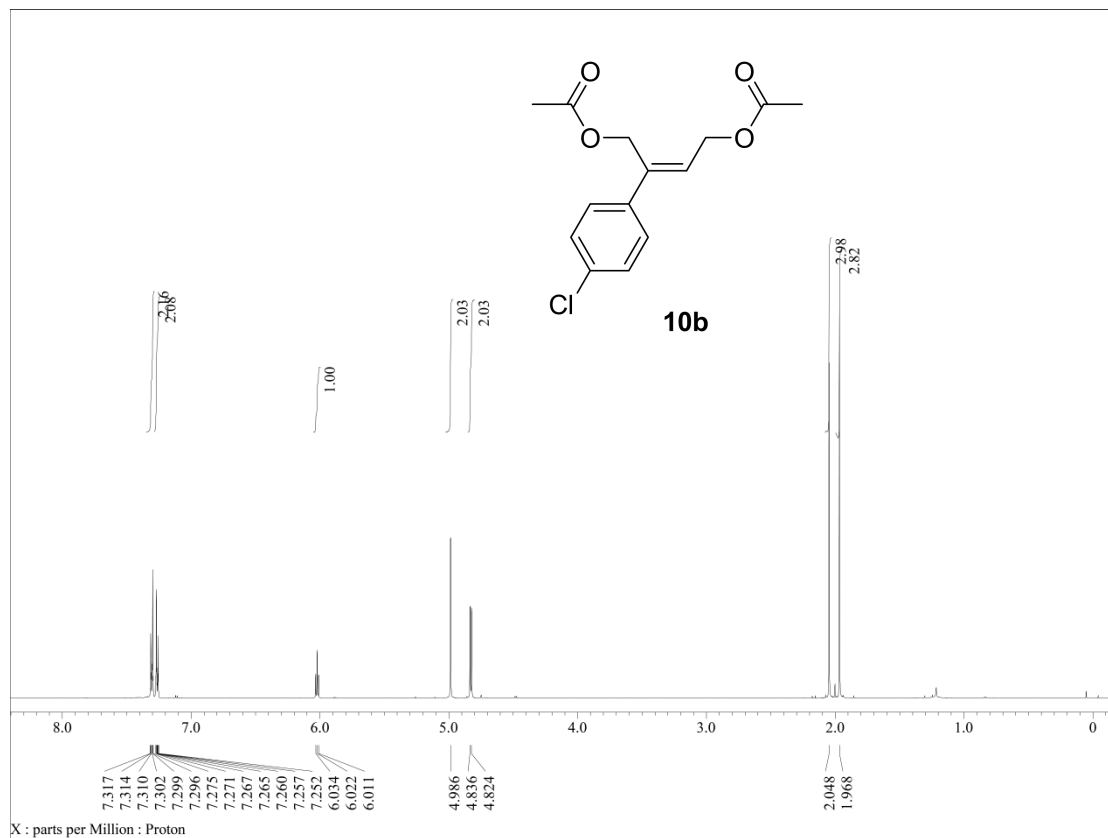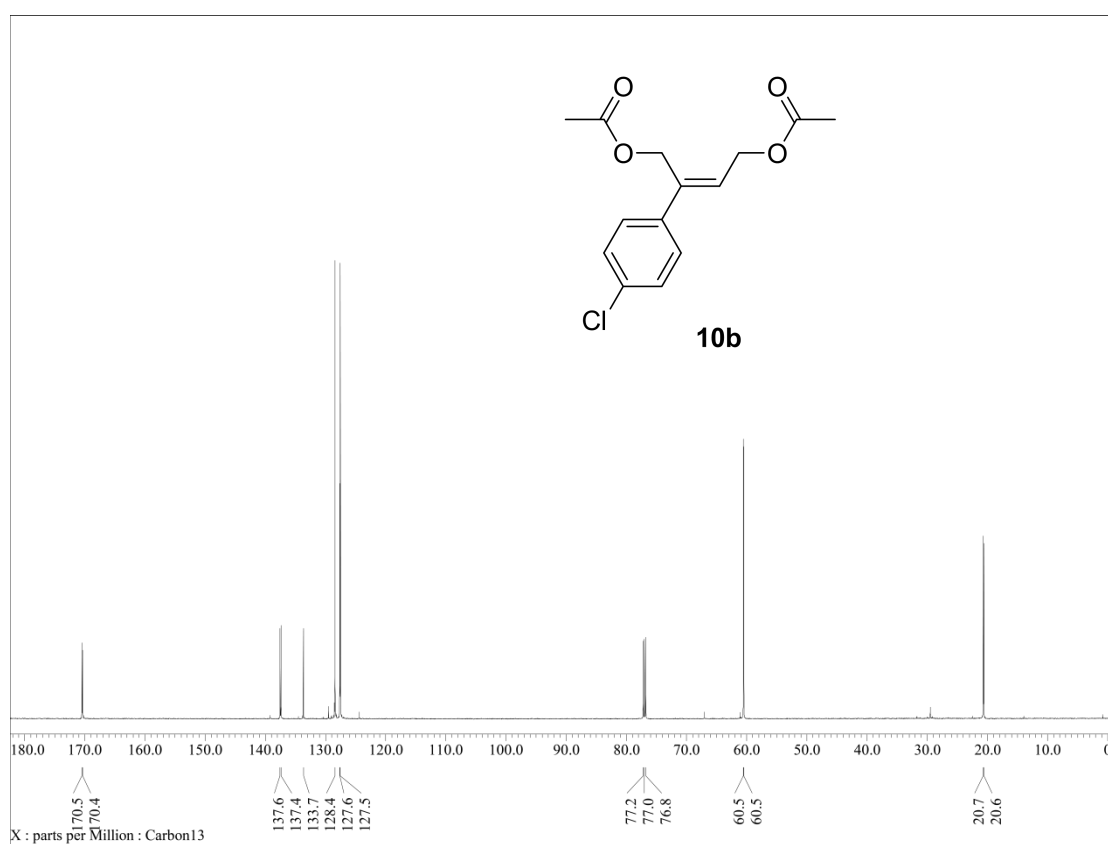



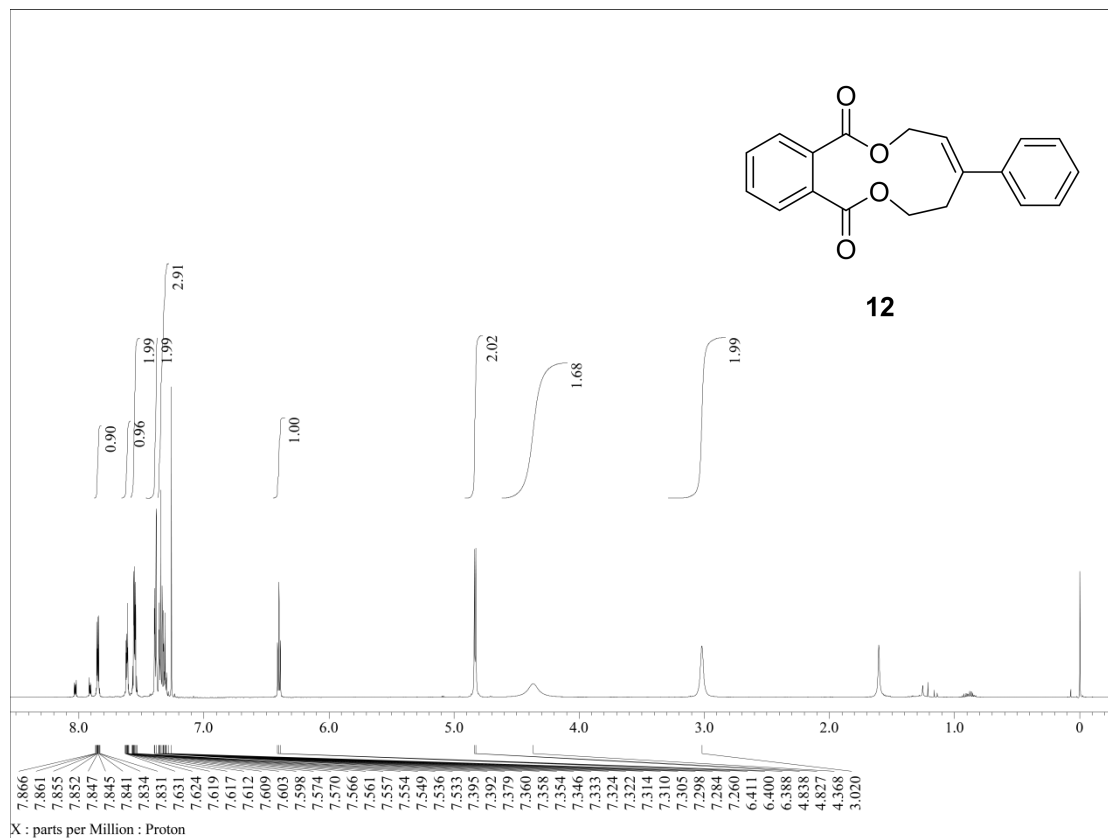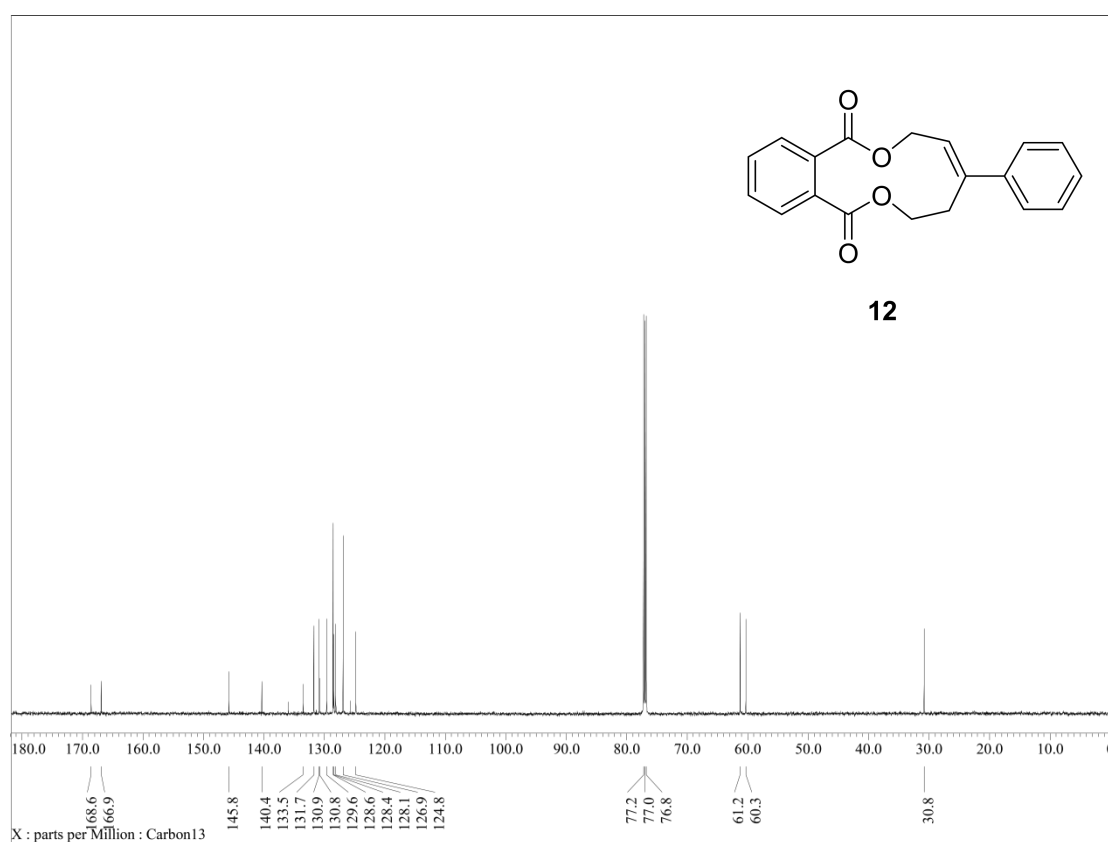

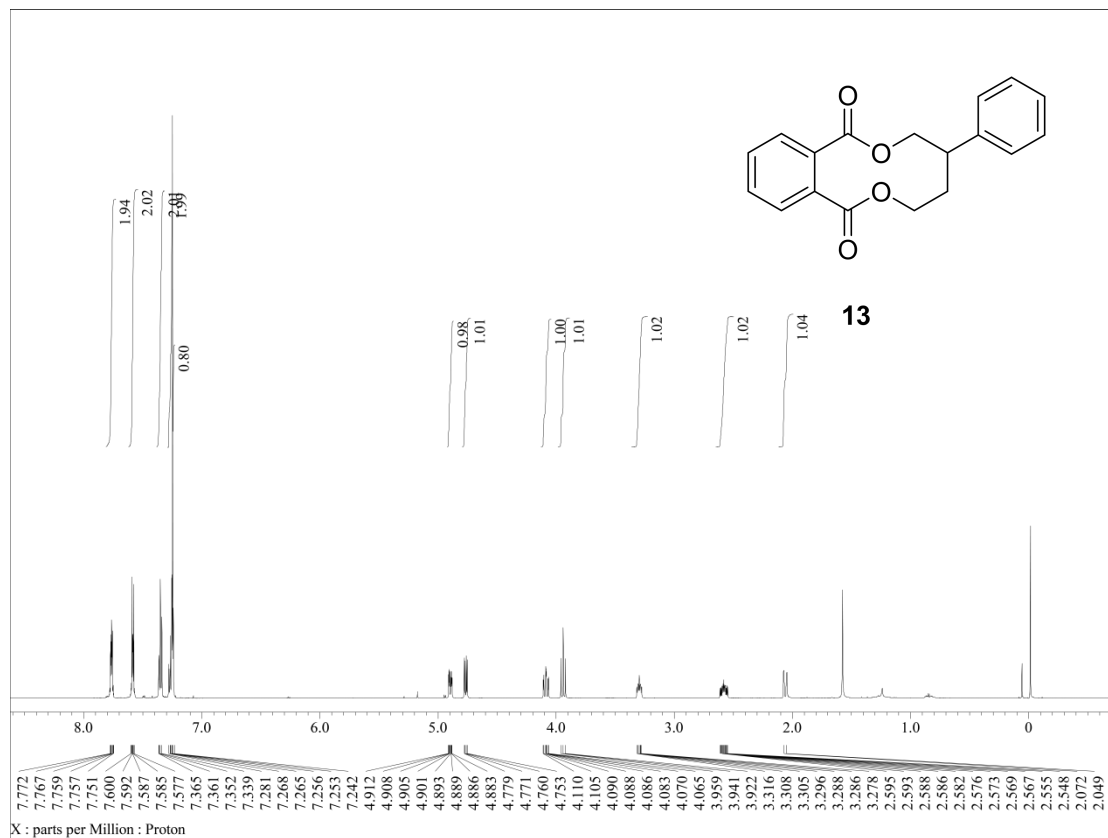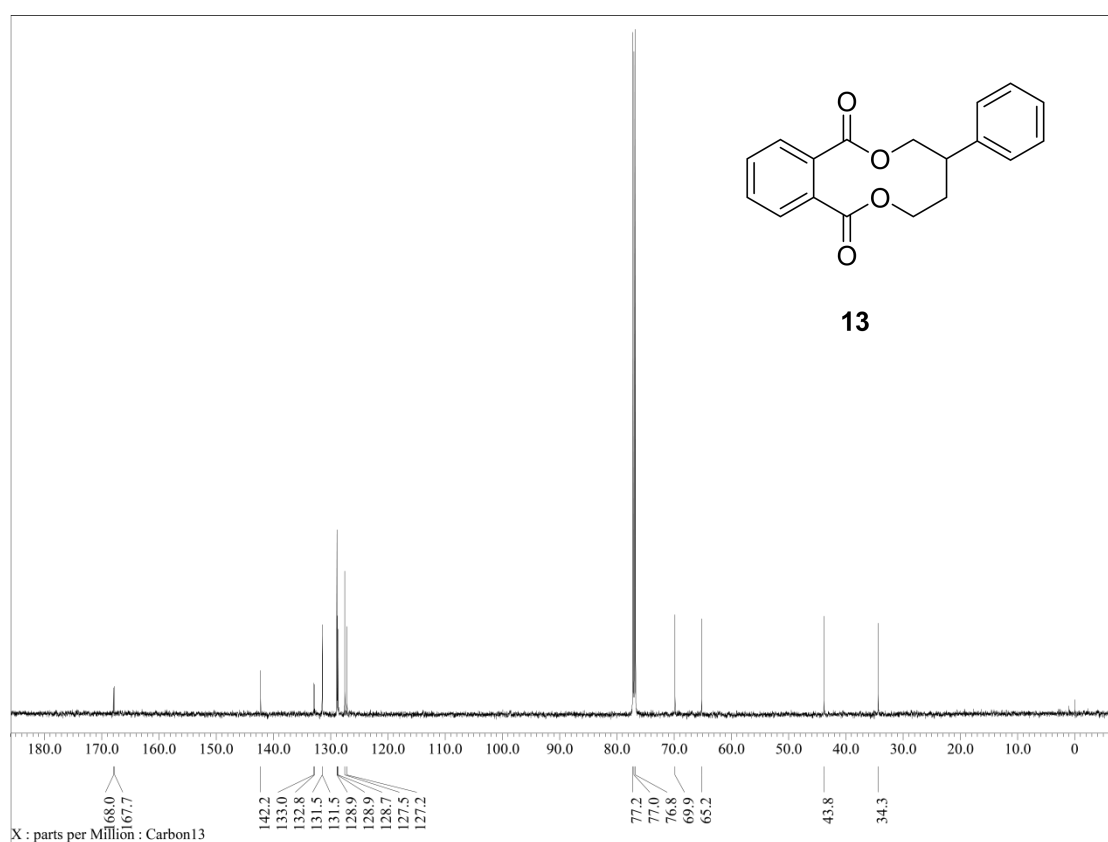



PS: The purity of the compound **3d** and **3u** determined by HPLC.

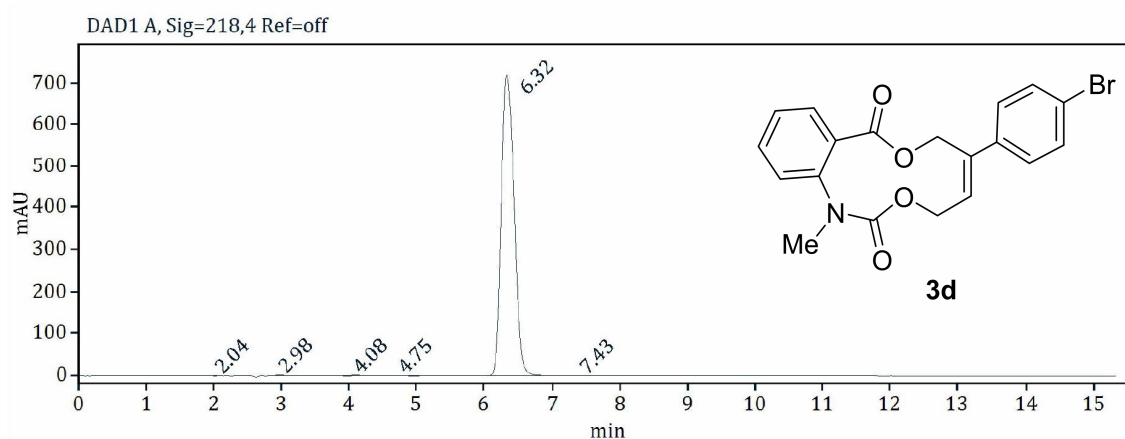

| Peak# | Ret. Time[min] | Area[mAU*s] | Height[mAU] | Rel. Area [%] |
|-------|----------------|-------------|-------------|---------------|
| 1     | 2.04           | 3.958       | 1.0301      | 0.0414        |
| 2     | 2.98           | 15.655      | 2.4083      | 0.1638        |
| 3     | 4.08           | 21.322      | 1.6707      | 0.2231        |
| 4     | 4.75           | 17.843      | 0.9887      | 0.1867        |
| 5     | 6.32           | 9491.991    | 720.8486    | 99.3013       |
| 6     | 7.43           | 8.004       | 0.393       | 0.0837        |

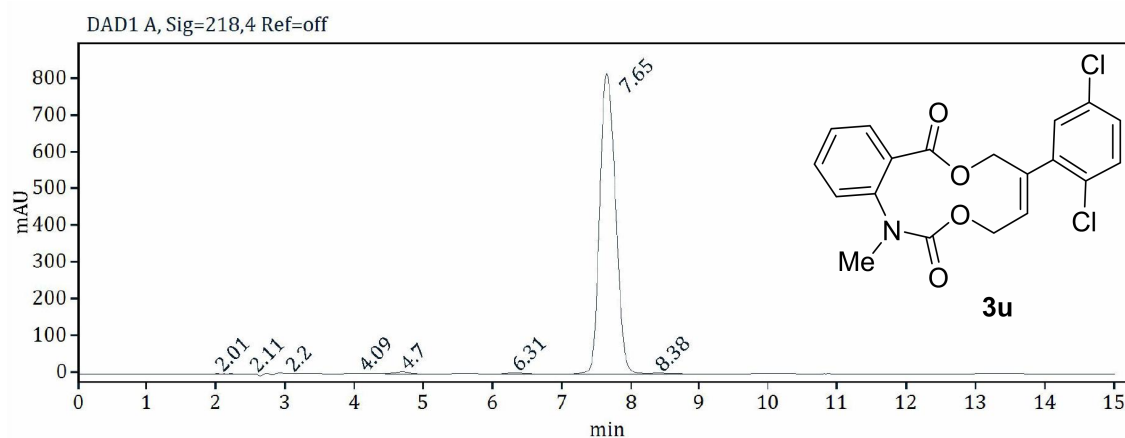

| Peak# | Ret. Time[min] | Area[mAU*s] | Height[mAU] | Rel. Area [%] |
|-------|----------------|-------------|-------------|---------------|
| 1     | 2.01           | 3.862       | 1.579       | 0.0296        |
| 2     | 2.11           | 2.309       | 0.7374      | 0.0177        |
| 3     | 2.2            | 5.065       | 1.5223      | 0.0389        |
| 4     | 4.09           | 16.071      | 1.2893      | 0.1234        |
| 5     | 4.7            | 75.925      | 5.1397      | 0.5828        |
| 6     | 6.31           | 38.917      | 2.9185      | 0.2987        |
| 7     | 7.65           | 12849.223   | 814.7239    | 98.6323       |
| 8     | 8.38           | 36.021      | 1.8596      | 0.2765        |
